# Supplementary material for: One-pot Dearomatizative C-Nucleophiles Telescoped Addition to Fluorinated 1,2,4-Oxadiazoles - Regioselective N-Functionalization
Source: Royal Society of Chemistry journal article supplement (doi:10.1039/d5qo01707f), 2026-01-01
Supplement: d5qo01707f1.pdf [file d5qo01707f1.pdf]

ELECTRONIC SUPPORTING INFORMATION  
For

**One-pot Dearomatizative C-Nucleophiles Telescoped Addition to  
Fluorinated 1,2,4-Oxadiazoles - Regioselective N-  
Functionalization**

Davide Castiglione,<sup>a</sup> Sara Amata,<sup>b</sup> Federica Lauria,<sup>a</sup> Andrea Maranzana,<sup>a</sup> Salvatore Baldino,<sup>a</sup> Alexander Roller-Prado,<sup>c</sup> Laura Castoldi,<sup>d\*</sup> Antonio Palumbo Piccionello,<sup>b\*</sup> Vittorio Pace<sup>e,f\*</sup> and Eisuke I. Comas Iwasita<sup>a</sup>

<sup>a</sup> University of Turin – Department of Chemistry, Via Giuria 7, 10125 Turin, Italy.

<sup>b</sup> University of Palermo – Department of Biological, Chemical and Pharmaceutical Sciences and Technologies, Viale delle Scienze Ed.17, 90128, Palermo, Italy. E-mail: antonio.palumbopiccionello@unipa.it

<sup>c</sup> University of Vienna - Department of Inorganic Chemistry – Functional Materials, Waehringerstrasse 42, 1090, Vienna, Austria.

<sup>d</sup> University of Milan – Department of Pharmaceutical Sciences, General and Organic Chemistry Section “A. Marchesini” – Via Venezian 21, 20133 Milan, Italy

<sup>e</sup> University of Rome "La Sapienza" - Department of Chemistry - P.le A. Moro, 5, 00185 Rome (Italy). E-mail: vittorio.pace@uniroma1.it

<sup>f</sup> University of Vienna - Department of Pharmaceutical Sciences, Josef-Holaubek-

**Table of contents**

|                                                                                                              |     |
|--------------------------------------------------------------------------------------------------------------|-----|
| <b>Instrumentation and General Analytical Methods</b> .....                                                  | 2   |
| <b>Synthesis and characterization of Starting Materials</b> .....                                            | 3   |
| <b>General procedures for the synthesis of substituted 5-trifluoromethyl-dihydro-1,2,4-oxadiazoles</b> ..... | 6   |
| <b>Characterization and Spectral Data of the Compounds</b> .....                                             | 7   |
| <b>Synthetic manipulation of products</b> .....                                                              | 24  |
| <b>Copies of <sup>1</sup>H, <sup>13</sup>C and <sup>19</sup>F-NMR Spectra of all compounds</b> .....         | 28  |
| <b>X-Ray Analysis for compounds 2, 13, 18, 23, 24 and 46</b> .....                                           | 109 |
| <b>Computational Details</b> .....                                                                           | 124 |
| <b>References</b> .....                                                                                      | 141 |



## Instrumentation and General Analytical Methods

$^1\text{H}$  and  $^{13}\text{C}$ -NMR spectra were recorded on a Jeol ECZR600 spectrometer operating at 600 MHz (600 MHz for  $^1\text{H}$ , 150 MHz for  $^{13}\text{C}$ , 565 MHz for  $^{19}\text{F}$ ) and on a Bruker Avance Neo 400 spectrometer (400 MHz for  $^1\text{H}$ , 100 MHz for  $^{13}\text{C}$ , 377 MHz for  $^{19}\text{F}$ ). The center of the (residual) solvent signal was used as an internal standard which was related to TMS with  $\delta$  7.26 ppm ( $^1\text{H}$  in  $\text{CDCl}_3$ ),  $\delta$  77.2 ppm ( $^{13}\text{C}$  in  $\text{CDCl}_3$ ), 2.05 ppm ( $^1\text{H}$  in acetone- $d_6$ ) and 202.26 – 29.84 ppm ( $^{13}\text{C}$  in acetone- $d_6$ ). Spin-spin coupling constants ( $J$ ) are given in Hz. Mass data were obtained on Agilent UHD accurate-mass Q-TOF LC/MS.

Starting materials were prepared as detailed below; those ones not reported in the manuscript are indicated with the descriptor **nn-sm**, being **nn** the corresponding final compound in the manuscript. All reactions were performed under an inert atmosphere of argon using standard Schlenk techniques. THF and  $\text{Et}_2\text{O}$  were distilled over Na/benzophenone. Chemicals and dry solvents were purchased from SigmaAldrich, Acros, Alfa Aesar, Fluorochem and TCI Europe. Solutions were evaporated under reduced pressure with a rotary evaporator. Melting points were determined on a Reichert–Kofler hot-stage microscope and are uncorrected. For column chromatography, silica Gel 60 (0.04–0.063 mm) was used. TLC was carried out on aluminium sheets precoated with silica gel 60F254 (Merchery-Nagel, Merk); the spots were visualized under UV light ( $\lambda = 254$  nm) and/or  $\text{KMnO}_4$  (aq.) was used as revealing system.



## Synthesis and characterization of Starting Materials

Most of 3-aryl-5-(trifluoromethyl)-1,2,4-oxadiazoles employed as starting materials are known substrates and were prepared as previously reported (see Table below).

|                                                                                                                                                                                     |                                                                                                                                                                                             |                                                                                                                                                                                               |
|-------------------------------------------------------------------------------------------------------------------------------------------------------------------------------------|---------------------------------------------------------------------------------------------------------------------------------------------------------------------------------------------|-----------------------------------------------------------------------------------------------------------------------------------------------------------------------------------------------|
| 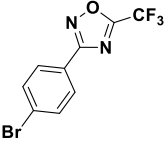 <p>Y. Huang <i>et al.</i><br/>Org. Lett. 2022, <b>24</b>, 2055</p> <p><b>1</b></p>                |  <p>Ali Darehkordi <i>et al.</i><br/>J. Heterocycl. Chem.<br/>2018, <b>55</b>, 1702</p> <p><b>4-sm</b></p> |  <p>Y. Huang <i>et al.</i><br/>Org. Lett. 2022, <b>24</b>, 2055</p> <p><b>6-sm</b></p>                     |
|  <p>Buscemi, S. <i>et al.</i><br/>J. Org. Chem. 2003, <b>68</b>, 2, 605</p> <p><b>8-sm</b></p>     |  <p>Y. Huang <i>et al.</i><br/>Org. Lett. 2022, <b>24</b>, 2055</p> <p><b>9-sm</b></p>                     |  <p>P. P. Onys'ko. <i>et al.</i><br/>Tetrahedron 2014, <b>70</b>, 2928</p> <p><b>10-sm</b></p>             |
|  <p>Buscemi, S. <i>et al.</i><br/>Eur. J. Org. Chem. 2004, <b>5</b>, 974</p> <p><b>12-sm</b></p> |  <p>Buscemi, S. <i>et al.</i><br/>Eur. J. Org. Chem. 2004, <b>5</b>, 974</p> <p><b>17-sm</b></p>         |  <p>E. Camaioni <i>et al.</i><br/>Bioorg. Med. Chem.<br/>2020, <b>28</b>, 115731</p> <p><b>18-sm</b></p> |

Table 1. Previously reported starting materials.

Unknown analogues were obtained adapting the reported procedure<sup>1</sup>, according to the general protocol:

A solution of the aryl-amidoxime (1.0 mmol, 1.0 equiv) and trifluoroacetic anhydride (1.2 mmol, 1.2 equiv) in anhydrous toluene (10 mL) was refluxed for 8 h. After removal of the solvent, the residue was treated with water and the organic phase was extracted with EtOAc, washed with brine, dried over Na<sub>2</sub>SO<sub>4</sub> and concentrated under reduced pressure. The final 3-aryl-5-trifluoromethyl-1,2,4-oxadiazole was obtained after purification by column chromatography on silica gel, as reported below.



### Isopropyl 3-(5-(trifluoromethyl)-1,2,4-oxadiazol-3-yl)benzoate (5-sm)

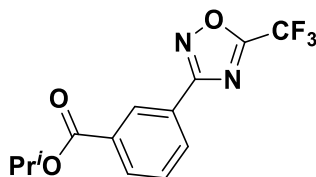

By following the general protocol, compound **5-sm** was obtained in 69% yield as colorless oil after chromatography on silica gel (50:1 v/v, petroleum ether/ethyl acetate).

**<sup>1</sup>H-NMR** (400 MHz, CDCl<sub>3</sub>)  $\delta$ : 8.75 (t, 1H, J=1.8 Hz), 8.28 (dt, 1H, J=7.9, 1.5 Hz), 8.24 (dt, 1H, J=7.8, 1.5 Hz), 7.60 (t, 1H, J=7.8 Hz), 5.30 (hept, 1H, J=6.3 Hz), 1.40 (d, 6H, J=6.3 Hz).

**<sup>13</sup>C-NMR** (100 MHz, CDCl<sub>3</sub>)  $\delta$ : 168.6 (s), 166.06 (q, J=44.6 Hz), 165.0 (s), 133.1 (s), 132.1 (s), 131.6 (s), 129.3 (s), 128.7 (s), 125.3 (s), 116.0 (q, J=273.7 Hz), 69.1 (s), 21.9 (s).

**<sup>19</sup>F-NMR** (377 MHz, CDCl<sub>3</sub>)  $\delta$ : -65.4 (s).

**GC/MS** distribution for C<sub>13</sub>H<sub>11</sub>N<sub>2</sub>O<sub>3</sub>F<sub>3</sub> 69(100%), 241 (100%), 259 (40%), 300 (5%)

### 3-(pyridin-2-yl)-5-(trifluoromethyl)-1,2,4-oxadiazole (7-sm)

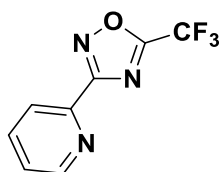

By following the general protocol, compound **7-sm** was obtained in 33% yield as yellow oil after chromatography on silica gel (50:1 v/v, petroleum ether/ethyl acetate).

**<sup>1</sup>H-NMR** (600 MHz, CDCl<sub>3</sub>)  $\delta$ : 8.81 (ddd, 1H, J=4.8, 1.7, 0.9 Hz), 8.15 (dt, 1H, J=7.9, 1.1 Hz), 7.89 (td, 1H, J=7.8, 1.8 Hz), 7.48 (ddd, 1H, J=7.7, 4.8, 1.2 Hz).

**<sup>13</sup>C-NMR** (150 MHz, CDCl<sub>3</sub>)  $\delta$ : 168.8 (s), 166.4 (q, J=44.7 Hz), 150.7 (s), 144.6 (s), 137.3 (s), 126.4 (s), 123.6 (s), 115.8 (q, J=274.0 Hz).

**<sup>19</sup>F-NMR** (565 MHz, CDCl<sub>3</sub>)  $\delta$ : -65.2 (s).

**HRMS** (ESI) [M+H]<sup>+</sup>: m/z for C<sub>8</sub>H<sub>5</sub>N<sub>3</sub>OF<sub>3</sub><sup>+</sup> theoretical: 216.0379; found: 216.0396.

### 3-(thiophen-2-yl)-5-(trifluoromethyl)-1,2,4-oxadiazole (13-sm)

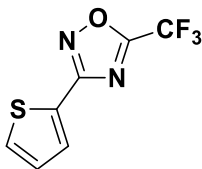

By following the general protocol, compound **13-sm** was obtained in 41% yield as yellow oil after chromatography on silica gel (50:1 v/v, petroleum ether/ethyl acetate).

**<sup>1</sup>H-NMR** (600 MHz, CDCl<sub>3</sub>)  $\delta$ : 7.88 (dd, J=3.7, 1.2 Hz), 7.59 (dd, J=5.0, 1.2 Hz), 7.19 (dd, J=5.0, 3.7 Hz).

**<sup>13</sup>C-NMR** (150 MHz, CDCl<sub>3</sub>)  $\delta$ : 165.6 (q, J=44.5 Hz), 165.2 (s), 131.2 (s), 130.8 (s), 128.3 (s), 126.1 (s), 115.9 (q, J=273.9 Hz).

**<sup>19</sup>F-NMR** (565 MHz, CDCl<sub>3</sub>)  $\delta$ : -65.3 (s).

**GC/MS** distribution for C<sub>7</sub>H<sub>3</sub>N<sub>2</sub>OSF<sub>3</sub> 69(100%), 125(25%), 220 (50%).



***N,N*-dimethyl-4-(5-(trifluoromethyl)-1,2,4-oxadiazol-3-yl)aniline (16-*sm*)**

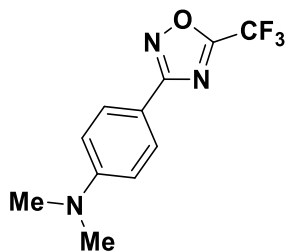

By following the general protocol, compound **16-*sm*** was obtained in 62% yield as white solid (m.p.: 95-96 °C) after chromatography on silica gel (50:1 v/v, petroleum ether/ethyl acetate).

**<sup>1</sup>H-NMR** (600 MHz, CDCl<sub>3</sub>) δ: 7.95 (m, 2H), 6.74 (m, 2H), 3.06 (s, 6H).

**<sup>13</sup>C-NMR** (150 MHz, CDCl<sub>3</sub>) δ: 169.2 (s), 165.0 (q, J=43.9 Hz), 152.7 (s), 129.0 (s), 116.2 (q, J=273.5 Hz), 111.7 (s), 111.6 (s), 40.0 (s).

**<sup>19</sup>F-NMR** (565 MHz, CDCl<sub>3</sub>) δ: -65.4 (s).

**HRMS** (ESI) [M+H]<sup>+</sup>: m/z for C<sub>11</sub>H<sub>11</sub>N<sub>3</sub>OF<sub>3</sub><sup>+</sup> theoretical 258.0849; found: 258.0853

**3-(pyridin-4-yl)-5-(trifluoromethyl)-1,2,4-oxadiazole (24-*sm*)**

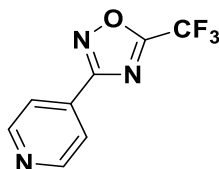

By following the general protocol, compound **24-*sm*** was obtained in 55% yield as yellow oil after chromatography on silica gel (50:1 v/v, petroleum ether/ethyl acetate).

**<sup>1</sup>H-NMR** (600 MHz, CDCl<sub>3</sub>) δ: 8.89 (d, 2H, J=6.3 Hz), 8.14 (d, 2H, J=6.3 Hz).

**<sup>13</sup>C-NMR** (150 MHz, CDCl<sub>3</sub>) δ: 167.2 (s), 166.9 (d, q=45.0 Hz), 149.1 (s), 134.2 (s), 122.2 (s), 115.7 (q, J=274.1 Hz).

**<sup>19</sup>F-NMR** (565 MHz, CDCl<sub>3</sub>) δ: -65.3 (s).

**HRMS** (ESI) [M+H]<sup>+</sup>: m/z for C<sub>8</sub>H<sub>5</sub>N<sub>3</sub>OF<sub>3</sub><sup>+</sup> theoretical: 216.0379; found 216.0396



## **General procedures for the synthesis of substituted 5-trifluoromethyl-dihydro-1,2,4-oxadiazoles**

### **General procedure for the addition of lithium halocarbenoids and trapping of MeI: (GP1)**

Under Ar atmosphere, to the solution of 3-aryl-5-(trifluoromethyl)-1,2,4-oxadiazoles (1.0 equiv) in dry THF (THF/Et<sub>2</sub>O 1:1 for fluoromethylation), the competent dihalomethane (3 equiv) was added and the resulting solution was cooled down to -78 °C. Then MeLi-LiBr (2.2 M in Et<sub>2</sub>O, 2.8 equiv) was added dropwise and the mixture was stirred overnight and allowed to gradually reach room temperature; subsequently, a saturated solution of NH<sub>4</sub>Cl<sub>(aq.)</sub> was added. The organic phase was extracted with EtOAc (3 x 10 mL) and was washed with brine then, was dried over anhydrous Na<sub>2</sub>SO<sub>4</sub> and the solvent was removed under reduced pressure. The final product was obtained after purification by column chromatography on silica gel.

### **General procedure for the addition of organolithium and Grignard reagents (GP2)**

Under Ar atmosphere, to the solution of 3-aryl-5-(trifluoromethyl)-1,2,4-oxadiazoles (1.0 equiv) in dry THF, cooled to -78 °C, the competent organolithium or Grignard reagent (2.8 equiv) was added dropwise and, the mixture was stirred for 1 hour; subsequently, a saturated solution of NH<sub>4</sub>Cl<sub>(aq.)</sub> was added. The organic phase was extracted with EtOAc (3 x 10 mL) and was washed with brine then, was dried over anhydrous Na<sub>2</sub>SO<sub>4</sub> and the solvent was removed under reduced pressure. The final product was obtained after filtration on silica plug.

### **General procedure for the addition of lithium halocarbenoids and protonation at position 2: (GP3)**

Under Ar atmosphere, to the solution of 3-aryl-5-(trifluoromethyl)-1,2,4-oxadiazoles (1.0 equiv) in dry THF (or dry 1:1 THF/Et<sub>2</sub>O for fluoromethylation), the competent dihalomethane (3 equiv) was added and the resulting solution was cooled down to -78 °C. Then PhLi (1.9 M in dibutyl ether, 2.8 equiv) was added dropwise and, the mixture was stirred for 1 hour; subsequently, a saturated solution of NH<sub>4</sub>Cl<sub>(aq.)</sub> was added. The organic phase was extracted with EtOAc (3 x 10 mL) and was washed with brine then, was dried over anhydrous Na<sub>2</sub>SO<sub>4</sub> and the solvent was removed under reduced pressure. The final product was obtained after purification by column chromatography on silica gel.

### **General procedure for the addition of lithium halocarbenoids and trapping of an external electrophile: (GP4)**

Under Ar atmosphere, to the solution of 3-aryl-5-(trifluoromethyl)-1,2,4-oxadiazoles (1.0 equiv) in dry THF (or dry 1:1 THF/Et<sub>2</sub>O for fluoromethylation), the competent dihalomethane (3 equiv) was added and the resulting solution was cooled down to -78 °C. Then PhLi (1.9 M in dibutyl ether, 2.8 equiv) was added dropwise and, the mixture was stirred for 1 hour, then the electrophile was added dropwise to the solution. The mixture was stirred overnight and allowed to gradually reach room temperature. Subsequently, a saturated solution of NH<sub>4</sub>Cl<sub>(aq.)</sub> was added. The organic phase was extracted with EtOAc (3 x 10 mL) and was washed with brine then, was dried over anhydrous Na<sub>2</sub>SO<sub>4</sub> and the solvent was removed under reduced pressure. The final product was obtained after purification by column chromatography on silica gel.



## Characterization and Spectral Data of the Compounds

### 3-(4-bromophenyl)-5-(chloromethyl)-2-methyl-5-(trifluoromethyl)-2,5-dihydro-1,2,4-oxadiazole (2)

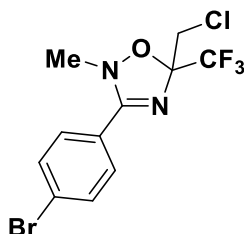

By following the general procedure 1 (GP1), starting from 3-(4-bromophenyl)-5-(trifluoromethyl)-1,2,4-oxadiazole (293.4 mg, 1.0 mmol, 1.0 equiv), chloriodomethane (529.1 mg, 0.22 mL, 3.0 mmol, 3.0 equiv) and MeLi-LiBr complex (1.27 mL of a solution 2.2 M in Et<sub>2</sub>O, 2.8 mmol, 2.8 equiv) in THF (5 mL), compound **2** was obtained in 86% yield (307.5 mg) as white solid (m.p.: 92 °C) after chromatography on silica gel (97:3 v/v, petroleum ether/ethyl acetate).

<sup>1</sup>H-NMR (600 MHz, CDCl<sub>3</sub>) δ: 7.62 (br s, 4H), 4.02 (d, 1H, J = 12.6 Hz), 3.82 (d, 1H, J = 12.2 Hz), 3.16 (s, 3H).

<sup>13</sup>C-NMR (150 MHz, CDCl<sub>3</sub>) δ: 168.7 (s), 132.3 (s), 130.3 (s), 127.2 (s), 124.7 (s), 121.9 (q, J = 288.0 Hz), 105.7 (q, J = 30.1 Hz), 43.4 (s), 42.5 (s).

<sup>19</sup>F-NMR (565 MHz, CDCl<sub>3</sub>) δ: -80.8 (s).

HRMS (ESI), m/z: calc. for C<sub>11</sub>H<sub>9</sub>BrClF<sub>3</sub>N<sub>2</sub>O<sup>+</sup>: 356,9612 [M+H]<sup>+</sup>; found: 356,9617.

### 3-(4-bromophenyl)-5-(iodomethyl)-4-methyl-5-(trifluoromethyl)-4,5-dihydro-1,2,4-oxadiazole (3)

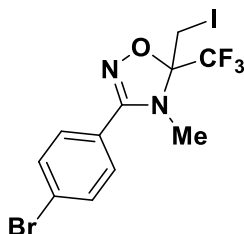

By following the general procedure 1 (GP1), starting from 3-(4-bromophenyl)-5-(trifluoromethyl)-1,2,4-oxadiazole (293.4 mg, 1.0 mmol, 1.0 equiv), diiodomethane (903.5 mg, 0.24 mL, 3.0 mmol, 3.0 equiv) and MeLi-LiBr complex (1.27 mL of a solution 2.2 M in Et<sub>2</sub>O, 2.8 mmol, 2.8 equiv) in THF (5 mL), compound **3** was obtained in 88% yield (395.1 mg) as white solid (m.p.: 70 °C) after chromatography on silica gel (97:3 v/v, petroleum ether/ethyl acetate).

<sup>1</sup>H-NMR (600 MHz, CDCl<sub>3</sub>) δ: 7.63 (br s, 4H), 3.84 (d, 1H, J = 11.4 Hz), 3.60 (d, 1H, J = 11.5 Hz), 3.23 (s, 3H).

<sup>13</sup>C-NMR (150 MHz, CDCl<sub>3</sub>) δ: 168.2 (s), 132.3 (s), 130.3 (s), 127.2 (s), 124.8 (s), 119.7 (q, J = 288.8 Hz), 104.9 (q, J = 30.4 Hz), 42.2 (s), 7.8 (s).

<sup>19</sup>F-NMR (565 MHz, CDCl<sub>3</sub>) δ: -80.6 (s).

HRMS (ESI), m/z: calc. for C<sub>11</sub>H<sub>10</sub>BrF<sub>3</sub>IN<sub>2</sub>O<sup>+</sup>: 448,8968 [M+H]<sup>+</sup>; found: 448,8970.

### 5-(chloromethyl)-3-(4-fluorophenyl)-2-methyl-5-(trifluoromethyl)-2,5-dihydro-1,2,4-oxadiazole (4)



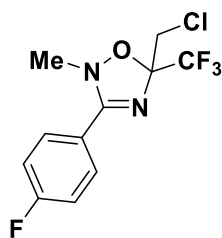

By following the general procedure 1 (GP1), starting from 3-(4-fluorophenyl)-5-(trifluoromethyl)-1,2,4-oxadiazole (232.1 mg, 1.0 mmol, 1.0 equiv), chloriodomethane (529.1 mg, 0.22 mL, 3.0 mmol, 3.0 equiv) and MeLi-LiBr complex (1.27 mL of a solution 2.2 M in Et<sub>2</sub>O, 2.8 mmol, 2.8 equiv) in THF (5 mL), compound **4** was obtained in 81% yield (240.2 mg) as yellow solid (m.p.: 70 °C) after chromatography on silica gel (98:2 v/v, petroleum ether/ethyl acetate).

Scale-up to 20 mmol:

By following the general procedure 1 (GP1), starting from 3-(4-fluorophenyl)-5-(trifluoromethyl)-1,2,4-oxadiazole (4.64 g, 20.0 mmol, 1.0 equiv), chloriodomethane (10.58 g, 4.4 mL, 60.0 mmol, 3.0 equiv) and MeLi-LiBr complex (25.4 mL of a solution 2.2 M in Et<sub>2</sub>O, 56.0 mmol, 2.8 equiv) in THF (100 mL), compound **4** was obtained in 84% yield (4.98 g) as yellow solid (m.p.: 70 °C) after chromatography on silica gel (98:2 v/v, petroleum ether/ethyl acetate).

**<sup>1</sup>H-NMR** (600 MHz, CDCl<sub>3</sub>) δ: 7.77 (m, 2H), 7.19 - 7.13 (m, 2H), 4.02 (d, 1H, J=12.2 Hz), 3.82 (d, 1H, J=12.2 Hz), 3.17 (s, 3H).

**<sup>13</sup>C-NMR** (150 MHz, CDCl<sub>3</sub>) δ: 168.6 (s), 165.2 (d, J=254.2 Hz), 131.26 (d, J=8.9 Hz), 121.9 (q, J=287.7 Hz), 122.00 (d, J=2.7 Hz), 116.32 (s), 116.17 (s), 105.65 (q, J=30.1 Hz), 43.5 (s), 42.6 (s).

**<sup>19</sup>F-NMR** (565 MHz, CDCl<sub>3</sub>) δ: -80.8 (s).

**HRMS (ESI)**, m/z: calc. for C<sub>11</sub>H<sub>9</sub>ClF<sub>4</sub>N<sub>2</sub>O<sup>+</sup>: 297,0412 [M+H]<sup>+</sup>; found: 297,0430.

**Isopropyl 3-(5-(chloromethyl)-2-methyl-5-(trifluoromethyl)-2,5-dihydro-1,2,4-oxadiazol-3-yl)benzoate (5)**

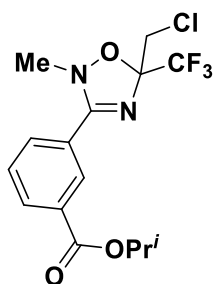

By following the general procedure 1 (GP1), starting from isopropyl 3-(5-(trifluoromethyl)-1,2,4-oxadiazol-3-yl)benzoate (300.2 mg, 1.0 mmol, 1.0 equiv), chloriodomethane (529.1 mg, 0.22 mL, 3.0 mmol, 3.0 equiv) and MeLi-LiBr complex (1.27 mL of a solution 2.2 M in Et<sub>2</sub>O, 2.8 mmol, 2.8 equiv) in THF (5 mL), compound **5** was obtained in 86% yield (312.6 mg) as yellow oil after chromatography on silica gel (92:8 v/v, petroleum ether/ethyl acetate).

**<sup>1</sup>H-NMR** (400 MHz, CDCl<sub>3</sub>) δ: 8.35 (s, 1H), 8.21 (d, 1H, J=7.8 Hz), 7.93 (d, 1H, J=7.7 Hz), 7.55 (t, 1H, J=7.8 Hz), 5.26 (hept, 1H, J=6.3 Hz), 4.02 (d, 1H, J=12.2 Hz), 3.82 (d, 1H, J=12.3 Hz), 3.17 (s, 3H), 1.37 (d, 6H, J=6.4 Hz).

**<sup>13</sup>C-NMR** (100 MHz, CDCl<sub>3</sub>) δ: 168.8 (s), 164.7 (s), 133.3 (s), 132.8 (s), 131.8 (s), 129.7 (s), 129.1 (s), 126.2 (s), 121.9 (q, J=287.9 Hz), 105.7 (q, J=30.2 Hz), 69.1 (s), 43.4 (s), 42.4 (s), 21.8 (s).

**<sup>19</sup>F-NMR** (377 MHz, CDCl<sub>3</sub>) δ: -80.9 (s).

**HRMS (ESI)**, m/z: calc. for C<sub>15</sub>H<sub>17</sub>ClF<sub>3</sub>N<sub>2</sub>O<sub>3</sub><sup>+</sup>: 365,0874 [M+H]<sup>+</sup>; found: 365,0875.



#### 4-(5-(chloromethyl)-2-methyl-5-(trifluoromethyl)-2,5-dihydro-1,2,4-oxadiazol-3-yl) benzonitrile (6)

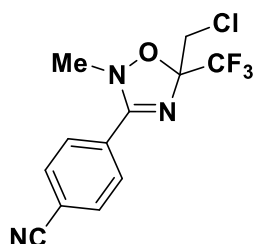

By following the general procedure 1 (GP1), starting from 4-(5-(trifluoromethyl)-1,2,4-oxadiazol-3-yl)benzonitrile (239.2 mg, 1.0 mmol, 1.0 equiv), chloriodomethane (529.1 mg, 0.22 mL, 3.0 mmol, 3.0 equiv) and MeLi-LiBr complex (1.27 mL of a solution 2.2 M in Et<sub>2</sub>O, 2.8 mmol, 2.8 equiv) in THF (5 mL), compound **6** was obtained in 91% yield (276.4 mg) as white solid (m.p.: 118 °C) after chromatography on silica gel (89:11 v/v, petroleum ether/ethyl acetate).

<sup>1</sup>H-NMR (600 MHz, CDCl<sub>3</sub>) δ: 7.90 - 7.82 (m, 2H), 7.81 - 7.73 (m, 2H), 4.02 (d, 1H, J=12.3 Hz), 3.82 (d, 1H, J=12.3 Hz), 3.16 (s, 3H).

<sup>13</sup>C-NMR (150 MHz, CDCl<sub>3</sub>) δ: 168.0 (s), 132.8 (s), 130.2 (s), 129.7 (s), 121.9 (q, J = 287.7 Hz), 117.7 (s), 116.2 (s), 106.1 (q, J = 30.3 Hz), 43.5 (s), 42.4 (s).

<sup>19</sup>F-NMR (565 MHz, CDCl<sub>3</sub>) δ: -80.8 (s).

HRMS (ESI), m/z: calc. for C<sub>12</sub>H<sub>9</sub>ClF<sub>3</sub>N<sub>3</sub>O<sup>+</sup>: 304,0459 [M+H]<sup>+</sup>; found: 304,0460.

#### 5-(chloromethyl)-2-methyl-3-(pyridin-2-yl)-5-(trifluoromethyl)-2,5-dihydro-1,2,4-oxadiazole (7)

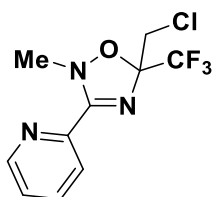

By following the general procedure 1 (GP1), starting from 3-(pyridin-2-yl)-5-(trifluoromethyl)-1,2,4-oxadiazole (215.1 mg, 1.0 mmol, 1.0 equiv), chloriodomethane (529.1 mg, 0.22 mL, 3.0 mmol, 3.0 equiv) and MeLi-LiBr complex (1.27 mL of a solution 2.2 M in Et<sub>2</sub>O, 2.8 mmol, 2.8 equiv) in THF (5 mL), compound **7** was obtained in 89% yield (248.8 mg) as white solid (m.p.: 33 °C) after chromatography on silica gel (87:13 v/v, petroleum ether/ethyl acetate).

<sup>1</sup>H-NMR (600 MHz, CDCl<sub>3</sub>) δ: 8.67 (ddd, 1H, J = 4.8, 1.7, 0.9 Hz), 8.14 (dt, 1H, J = 7.9, 1.0 Hz), 7.82 (td, 1H, J = 7.8, 1.8 Hz), 7.44 (ddd, 1H J = 7.7, 4.8, 1.2 Hz), 4.01 (d, 1H, J = 12.5 Hz), 3.83 (d, 1H J = 12.2 Hz), 3.51 (s, 3H).

<sup>13</sup>C-NMR (150 MHz, CDCl<sub>3</sub>) δ: 166.5 (s), 149.3 (s), 145.5 (s), 137.0 (s), 126.3 (s), 125.2 (s), 122.0 (q, J = 288.1 Hz), 105.0 (q, J = 30.2 Hz), 43.4 (s), 42.2 (s).

<sup>19</sup>F-NMR (565 MHz, CDCl<sub>3</sub>) δ: -80.8 (s).

HRMS (ESI), m/z: calc. for C<sub>10</sub>H<sub>10</sub>ClF<sub>3</sub>N<sub>3</sub>O<sup>+</sup>: 280,0459 [M+H]<sup>+</sup>; found: 280,0464.

#### 5-(chloromethyl)-2-methyl-3-phenyl-5-(trifluoromethyl)-2,5-dihydro-1,2,4-oxadiazole (8)

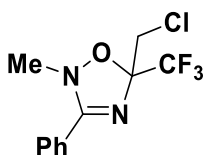



By following the general procedure 1 (GP1), starting from 3-(phenyl)-5-(trifluoromethyl)-1,2,4-oxadiazole (214.2 mg, 1.0 mmol, 1.0 equiv), chloriodomethane (529.1 mg, 0.22 mL, 3.0 mmol, 3.0 equiv) and MeLi-LiBr complex (1.27 mL of a solution 2.2 M in Et<sub>2</sub>O, 2.8 mmol, 2.8 equiv) in THF (5 mL), compound **8** was obtained in 84% yield (234.0 mg) as white solid (m.p.: 61 °C) after chromatography on silica gel (98:2 v/v, petroleum ether/ethyl acetate).

<sup>1</sup>H-NMR (600 MHz, CDCl<sub>3</sub>) δ: 7.77-7.74 (m, 2H), 7.58-7.54 (m, 1H), 7.47 (m, 2H), 4.04 (d, 1H, J=12.1 Hz), 3.84 (d, 1H J=12.2 Hz), 3.19 (s, 3H).

<sup>13</sup>C-NMR (150 MHz, CDCl<sub>3</sub>) δ: 169.6 (s), 132.4 (s), 128.9 (s), 125.9 (s), 122.0 (q, J = 287.9 Hz), 105.6 (q, J = 30.0 Hz), 43.5 (s), 42.5 (s).

<sup>19</sup>F-NMR (565 MHz, CDCl<sub>3</sub>) δ: -80.8 (s).

HRMS (ESI), m/z: calc. for C<sub>11</sub>H<sub>11</sub>ClF<sub>3</sub>N<sub>2</sub>O<sup>+</sup>: 279,0507 [M+H]<sup>+</sup>; found: 279,0518.

### 3-(4-chlorophenyl)-5-(fluoromethyl)-2-methyl-5-(trifluoromethyl)-2,5-dihydro-1,2,4-oxadiazole (**9**)

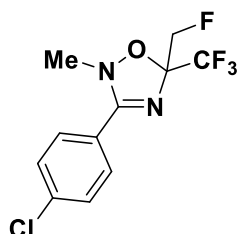

By following the general procedure 1 (GP1), starting from 3-(4-chlorophenyl)-5-(trifluoromethyl)-1,2,4-oxadiazole (248.6 mg, 1.0 mmol, 1.0 equiv), fluoroiodomethane (479.8 mg, 0.20 mL, 3.0 mmol, 3.0 equiv) and MeLi-LiBr complex (1.27 mL of a solution 2.2 M in Et<sub>2</sub>O, 2.8 mmol, 2.8 equiv) in THF/ Et<sub>2</sub>O 1:1 (5 mL), compound **9** was obtained in 85% yield (151.0 mg) as white solid (m.p.: 80 °C) after chromatography on silica gel (97:3 v/v, petroleum ether/ethyl acetate).

<sup>1</sup>H-NMR (600 MHz, CDCl<sub>3</sub>) δ: 7.71 (m, 2H), 7.46 (m, 2H), 4.75 (ddd, 1H, J=45.9, 10.1, 0.6 Hz), 4.63 (dd, 1H, J=46.9, 10.2 Hz), 3.14 (s, 3H).

<sup>13</sup>C-NMR (150 MHz, CDCl<sub>3</sub>) δ: 168.9 (s), 138.9 (s), 130.3 (s), 129.3 (s), 124.2 (s), 121.6 (qd, J=286.5, 4.2 Hz), 105.20 (m), 79.8 (d, J=179.5 Hz), 43.1 (s).

<sup>19</sup>F-NMR (565 MHz, CDCl<sub>3</sub>) δ: -80.5 (s), -239.6 (t, J=46.9 Hz).

HRMS (ESI), m/z: calc. for C<sub>11</sub>H<sub>10</sub>ClF<sub>4</sub>N<sub>2</sub>O<sup>+</sup>: 297,0412 [M+H]<sup>+</sup>; found: 297,0412.

### 5-(fluoromethyl)-2-methyl-5-(trifluoromethyl)-3-(4-(trifluoromethyl)phenyl)-2,5-dihydro-1,2,4-oxadiazole (**10**)

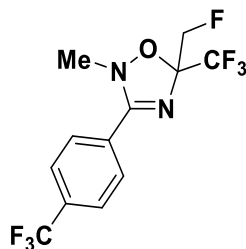

By following the general procedure 1 (GP1), starting from 5-(trifluoromethyl)-3-(4-(trifluoromethyl)phenyl)-1,2,4-oxadiazole (282.1 mg, 1.0 mmol, 1.0 equiv), fluoroiodomethane (479.8 mg, 0.20 mL, 3.0 mmol, 3.0 equiv) and MeLi-LiBr complex (1.27 mL of a solution 2.2 M in Et<sub>2</sub>O, 2.8 mmol, 2.8 equiv) in THF/ Et<sub>2</sub>O 1:1 (5 mL), compound **10** was obtained in 89% yield (293.9 mg) as colorless oil after chromatography on silica gel (98:2 v/v, petroleum ether/ethyl acetate).

<sup>1</sup>H-NMR (600 MHz, CDCl<sub>3</sub>) δ: 7.90 (d, 2H, J=8.1 Hz), 7.75 (d, 2H, J=8.3 Hz), 4.77 (dd, 1H, J=46.0, 10.2 Hz), 4.64 (dd, 1H, J=46.9, 10.2 Hz), 3.16 (s, 3H).



**<sup>13</sup>C-NMR** (150 MHz, CDCl<sub>3</sub>) δ: 168.6 (s), 134.3 (q, J=33.1 Hz), 129.5 (s), 129.3 (s), 129.3 (s), 128.5 (q, J = 276.0 Hz), 126.0 (q, J=11.0 Hz), 123.5 (qd, J=285.7, 4.7 Hz), 105.4 (m), 79.7 (d, J=179.5 Hz), 42.9 (s).

**<sup>19</sup>F-NMR** (565 MHz, CDCl<sub>3</sub>) δ: -63.1 (s), -80.5 (s), -239.8 (t, J=46.5 Hz).

**HRMS (ESI)**, m/z: calc. for C<sub>12</sub>H<sub>10</sub>F<sub>7</sub>N<sub>2</sub>O<sup>+</sup>: 331,0676 [M+H]<sup>+</sup>; found: 331,0676.

#### 4-(5-(fluoromethyl)-2-methyl-5-(trifluoromethyl)-2,5-dihydro-1,2,4-oxadiazol-3-yl)benzonitrile (**11**)

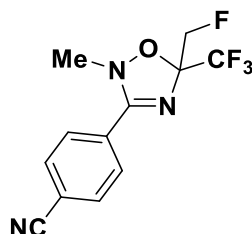

By following the general procedure 1 (GP1), starting from 4-(5-(trifluoromethyl)-1,2,4-oxadiazol-3-yl)benzonitrile (239.2 mg, 1.0 mmol, 1.0 equiv), fluoroiodomethane (479.8 mg, 0.20 mL, 3.0 mmol, 3.0 equiv) and MeLi-LiBr complex (1.27 mL of a solution 2.2 M in Et<sub>2</sub>O, 2.8 mmol, 2.8 equiv) in THF/ Et<sub>2</sub>O 1:1 (5 mL), compound **11** was obtained in 81% yield (249.7 mg) as yellow solid (m.p.: 88 °C) after chromatography on silica gel (90:10 v/v, petroleum ether/ethyl acetate).

**<sup>1</sup>H-NMR** (600 MHz, CDCl<sub>3</sub>) δ: 7.90-7.87 (m, 2H), 7.80-7.77 (m, 2H), 4.77 (dd, 1H, J=45.8, 10.3 Hz), 4.63 (dd, 1H, J=46.9, 10.2 Hz), 3.15 (s, 3H).

**<sup>13</sup>C-NMR** (150 MHz, CDCl<sub>3</sub>) δ: 168.1 (s), 132.6 (s), 130.0 (s), 129.6 (s), 121.4 (qd, J=286.5, 4.2 Hz), 117.6 (s), 116.1 (s), 105.5 (m), 79.6 (d, J=179.6 Hz), 42.8 (s).

**<sup>19</sup>F-NMR** (565 MHz, CDCl<sub>3</sub>) δ: -80.4 (s), -234.0 (t, J=46.9 Hz).

**HRMS (ESI)**, m/z: calc. for C<sub>12</sub>H<sub>10</sub>F<sub>4</sub>N<sub>3</sub>O<sup>+</sup>: 288,0755 [M+H]<sup>+</sup>; found: 288,0755.

#### 5-(fluoromethyl)-2-methyl-3-(4-nitrophenyl)-5-(trifluoromethyl)-2,5-dihydro-1,2,4-oxadiazole (**12**)

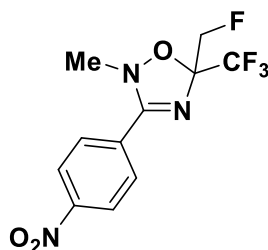

By following the general procedure 1 (GP1), starting from 3-(4-nitrophenyl)-5-(trifluoromethyl)-1,2,4-oxadiazole (259.1 mg, 1.0 mmol, 1.0 equiv), fluoroiodomethane (479.8 mg, 0.20 mL, 3.0 mmol, 3.0 equiv) and MeLi-LiBr complex (1.27 mL of a solution 2.2 M in Et<sub>2</sub>O, 2.8 mmol, 2.8 equiv) in THF/ Et<sub>2</sub>O 1:1 (5 mL), compound **12** was obtained in 83% yield (254.8 mg) as yellow solid (m.p.: 61 °C) after chromatography on silica gel (92:8 v/v, petroleum ether/ethyl acetate).

**<sup>1</sup>H-NMR** (600 MHz, CDCl<sub>3</sub>) δ: 8.36-8.33 (m, 2H), 7.98-7.95 (m, 2H), 4.78 (ddd, 1H, J=45.9, 10.2, 0.8 Hz), 4.64 (dd, 1H, J=46.9, 10.2 Hz), 3.16 (s, 3H).

**<sup>13</sup>C-NMR** (150 MHz, CDCl<sub>3</sub>) δ: 167.9 (s), 150.2 (s), 131.6 (s), 130.2 (s), 124.1 (s), 121.41 (qd, J = 286.7, 4.8 Hz), 105.61 (m), 79.57 (d, J = 179.7 Hz), 42.81 (s).

**<sup>19</sup>F-NMR** (565 MHz, CDCl<sub>3</sub>) δ: -84.4 (s), -219.1 (t, J = 46.7 Hz).

**HRMS (ESI)**, m/z: calc. for C<sub>11</sub>H<sub>10</sub>F<sub>4</sub>N<sub>3</sub>O<sub>3</sub><sup>+</sup>: 308,0653 [M+H]<sup>+</sup>; found: 308,0653.



### 5-(fluoromethyl)-2-methyl-3-(thiophen-2-yl)-5-(trifluoromethyl)-2,5-dihydro-1,2,4-oxadiazole (13)

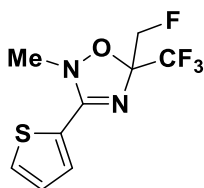

By following the general procedure 1 (GP1), starting from 3-(thiophen-2-yl)-5-(trifluoromethyl)-1,2,4-oxadiazole (220.2 mg, 1.0 mmol, 1.0 equiv), fluoroiodomethane (479.8 mg, 0.20 mL, 3.0 mmol, 3.0 equiv) and MeLi-LiBr complex (1.27 mL of a solution 2.2 M in Et<sub>2</sub>O, 2.8 mmol, 2.8 equiv) in THF/ Et<sub>2</sub>O 1:1 (5 mL), compound **13** was obtained in 84% yield (225.3 mg) as white solid (m.p.: 78 °C) after chromatography on silica gel (92:8 v/v, petroleum ether/ethyl acetate).

**<sup>1</sup>H-NMR** (600 MHz, CDCl<sub>3</sub>) δ: 7.60 (dd, 1H, J=5.0, 1.1 Hz), 7.57 (dd, 1H, J=3.8, 1.1 Hz), 7.15 (dd, 1H, J=5.0, 3.8 Hz), 4.78-4.58 (m, 2H), 3.28 (s, 3H).

**<sup>13</sup>C-NMR** (150 MHz, CDCl<sub>3</sub>) δ: 164.1 (s), 131.9 (s), 131.6 (s), 128.0 (s), 127.2 (s), 121.6 (qd, J=286.6, 4.0 Hz), 104.8 (m), 79.8 (d, J=179.8 Hz), 44.1 (s).

**<sup>19</sup>F-NMR** (565 MHz, CDCl<sub>3</sub>) δ: -80.4 (s), -239.2 (t, J=46.8 Hz).

**HRMS (ESI)**, m/z: calc. for C<sub>9</sub>H<sub>9</sub>F<sub>4</sub>N<sub>2</sub>OS<sup>+</sup>: 269,0366 [M+H]<sup>+</sup>; found: 269,0368.

### 3-(4-fluorophenyl)-5-(iodomethyl)-4-methyl-5-(trifluoromethyl)-4,5-dihydro-1,2,4-oxadiazole (14)

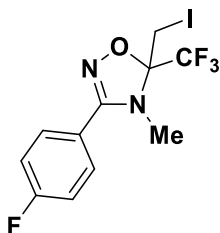

By following the general procedure 1 (GP1), starting from 3-(4-fluorophenyl)-5-(trifluoromethyl)-1,2,4-oxadiazole (232.1 mg, 1.0 mmol, 1.0 equiv), diiodomethane (903.5 mg, 0.24 mL, 3.0 mmol, 3.0 equiv) and MeLi-LiBr complex (1.27 mL of a solution 2.2 M in Et<sub>2</sub>O, 2.8 mmol, 2.8 equiv) in THF (5 mL), compound **14** was obtained in 91% yield (353.2 mg) as yellow solid (m.p.: 62 °C) after chromatography on silica gel (97:3 v/v, petroleum ether/ethyl acetate).

**<sup>1</sup>H-NMR** (600 MHz, CDCl<sub>3</sub>) δ: 7.78 – 7.75 (m, 2H), 7.20 – 7.15 (m, 2H), 3.84 (d, 1H, J = 11.5 Hz), 3.60 (d, 1H, J = 11.5 Hz), 3.23 (s, 3H).

**<sup>13</sup>C-NMR** (150 MHz, CDCl<sub>3</sub>) δ: 168.1 (s), 165.1 (d, J = 253.8 Hz), 131.2 (d, J = 8.8 Hz), 122.1 (d, J = 2.7 Hz), 119.8 (q, J = 288.9 Hz), 116.3 (d, J = 21.9 Hz), 104.8 (q, J = 30.2 Hz), 42.3 (s), 7.9 (s).

**<sup>19</sup>F-NMR** (565 MHz, CDCl<sub>3</sub>) δ: -80.6 (s), -105.7 (s).

**HRMS (ESI)**, m/z: calc. for C<sub>11</sub>H<sub>10</sub>F<sub>4</sub>IN<sub>2</sub>O<sup>+</sup>: 388,9768 [M+H]<sup>+</sup>; found: 388,9781.

### 5-(iodomethyl)-4-methyl-3-phenyl-5-(trifluoromethyl)-4,5-dihydro-1,2,4-oxadiazole (15)

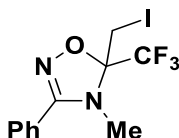

By following the general procedure 1 (GP1), starting from 3-(phenyl)-5-(trifluoromethyl)-1,2,4-oxadiazole (214.2 mg, 1.0 mmol, 1.0 equiv), diiodomethane (903.5 mg, 0.24 mL, 3.0 mmol, 3.0 equiv) and MeLi-LiBr complex (1.27 mL of a solution 2.2 M in Et<sub>2</sub>O, 2.8 mmol, 2.8 equiv) in THF (5 mL), compound **15** was obtained



in 85% yield (314.6 mg) as white solid (m.p.: 77 °C) after chromatography on silica gel (98:2 v/v, petroleum ether/ethyl acetate).

**<sup>1</sup>H-NMR** (600 MHz, CDCl<sub>3</sub>) δ: 7.75 (dd, 2H, J = 8.3, 1.4 Hz), 7.60 - 7.54 (m, 1H), 7.51 - 7.46 (m, 2H), 3.86 (d, 1H, J = 11.4 Hz), 3.61 (d, 1H, J = 11.4 Hz), 3.25 (s, 3H).

**<sup>13</sup>C-NMR** (150 MHz, CDCl<sub>3</sub>) δ: 169.1 (s), 132.4 (s), 128.9 (s), 128.9 (s), 125.9 (s), 119.8 (q, J = 289.0 Hz), 104.75 (q, J = 30.4 Hz), 42.2 (s), 8.03 (s).

**<sup>19</sup>F-NMR** (565 MHz, CDCl<sub>3</sub>) δ: -80.6 (s).

**HRMS (ESI)**, m/z: calc. for C<sub>11</sub>H<sub>11</sub>F<sub>3</sub>IN<sub>2</sub>O<sup>+</sup>: 370,9863 [M+H]<sup>+</sup>; found: 370,9876.

#### 4-(5-(iodomethyl)-4-methyl-5-(trifluoromethyl)-4,5-dihydro-1,2,4-oxadiazol-3-yl)-*N,N*-dimethylaniline (16)

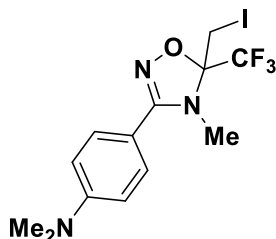

By following the general procedure 1 (GP1), starting from *N,N*-dimethyl-4-(5-(trifluoromethyl)-1,2,4-oxadiazol-3-yl)aniline (214.2 mg, 1.0 mmol, 1.0 equiv), diiodomethane (903.5 mg, 0.24 mL, 3.0 mmol, 3.0 equiv) and MeLi-LiBr complex (1.27 mL of a solution 2.2 M in Et<sub>2</sub>O, 2.8 mmol, 2.8 equiv) in THF (5 mL), compound **16** was obtained in 89% yield (367.7 mg) as yellow solid (m.p.: 112 °C) after chromatography on silica gel (90:10 v/v, petroleum ether/ethyl acetate).

**<sup>1</sup>H-NMR** (600 MHz, CDCl<sub>3</sub>) δ: 7.71 – 7.54 (m, 2H), 6.73 – 6.64 (m, 2H), 3.83 (d, 1H, J = 11.4 Hz), 3.60 (d, 1H, J = 11.4 Hz), 3.25 (s, 3H), 3.03 (s, 3H).

**<sup>13</sup>C-NMR** (150 MHz, CDCl<sub>3</sub>) δ: 169.3 (s), 152.8 (s), 130.4 (s), 119.9 (q, J = 289.3 Hz), 112.0 (s), 111.2 (s), 104.3 (q, J = 29.7 Hz), 43.22 (s), 40.0 (s), 8.4 (s).

**<sup>19</sup>F-NMR** (565 MHz, CDCl<sub>3</sub>) δ: -80.5 (s).

**HRMS (ESI)**, m/z: calc. for C<sub>13</sub>H<sub>16</sub>F<sub>3</sub>IN<sub>3</sub>O<sup>+</sup>: 414,0285 [M+H]<sup>+</sup>; found: 414,0288.

#### 5-(iodomethyl)-3-(4-methoxyphenyl)-4-methyl-5-(trifluoromethyl)-4,5-dihydro-1,2,4-oxadiazole (17)

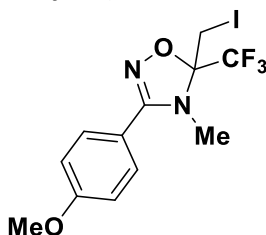

By following the general procedure 1 (GP1), starting from 3-(4-methoxyphenyl)-5-(trifluoromethyl)-1,2,4-oxadiazole (244.1 mg, 1.0 mmol, 1.0 equiv), diiodomethane (903.5 mg, 0.24 mL, 3.0 mmol, 3.0 equiv) and MeLi-LiBr complex (1.27 mL of a solution 2.2 M in Et<sub>2</sub>O, 2.8 mmol, 2.8 equiv) in THF (5 mL), compound **17** was obtained in 87% yield (348.1 mg) as white solid (m.p.: 98 °C) after chromatography on silica gel (97:3 v/v, petroleum ether/ethyl acetate).

**<sup>1</sup>H-NMR** (600 MHz, CDCl<sub>3</sub>) δ: 7.71 (d, 2H, J = 8.7 Hz), 6.97 (d, 2H, J = 8.8 Hz), 3.86 (s, 3H), 3.83 (d, 1H, J = 11.4 Hz), 3.60 (d, 1H, J = 11.4 Hz), 3.24 (s, 3H).

**<sup>13</sup>C-NMR** (150 MHz, CDCl<sub>3</sub>) δ: 168.8 (s), 162.8 (s), 130.7 (s), 119.8 (q, J = 288.9 Hz), 118.0 (s), 114.3 (s), 104.6 (q, J = 29.8 Hz), 55.5 (s), 42.7 (s), 8.2 (s).

**<sup>19</sup>F-NMR** (565 MHz, CDCl<sub>3</sub>) δ: -80.6 (s).

**HRMS (ESI)**, m/z: calc. for C<sub>12</sub>H<sub>13</sub>F<sub>3</sub>IN<sub>2</sub>O<sub>2</sub><sup>+</sup>: 400,9968 [M+H]<sup>+</sup>; found: 400,9978.



**5-(bromomethyl)-2-methyl-3-(3-methylphenyl)-5-(trifluoromethyl)-2,5-dihydro-1,2,4-oxadiazole (18)**  
**and 5-(bromomethyl)-4-methyl-3-(3-methylphenyl)-5-(trifluoromethyl)-4,5-dihydro-1,2,4-oxadiazole (18a)**

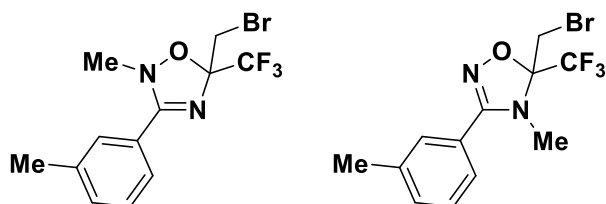

By following the general procedure 1 (GP1), starting from 3-(3-methylphenyl)-5-(trifluoromethyl)-1,2,4-oxadiazole (228.1 mg, 1.0 mmol, 1.0 equiv), bromiodomethane (662.5 mg, 0.22 mL, 3.0 mmol, 3.0 equiv) and MeLi-LiBr complex (1.27 mL of a solution 2.2 M in Et<sub>2</sub>O, 2.8 mmol, 2.8 equiv) in THF (5 mL), compounds **18-18a** was obtained in 86% yield (289.9 mg) as white solid (m.p.: 57-73°C) after chromatography on silica gel (97:3 v/v, petroleum ether/ethyl acetate). Ratio 1:0.8

**<sup>1</sup>H-NMR** (600 MHz, CDCl<sub>3</sub>) δ: 7.59 (br s, 1.7 H in total), 7.53 – 7.49 (m, 1.7 H in total), 7.38 – 7.33 (m, 3.4 H in total), 3.93 (d, 0.7 H, J = 11.5 Hz), 3.85 (d, 1 H, J = 11.4 Hz), 3.71 (d, 0.7 H, J = 11.6 Hz), 3.61 (d, 1 H, J = 11.5 Hz), 3.24 (s, 3 H), 3.21 (s, 2.3 H), 2.41 (br s, 5.4 H in total).

**<sup>13</sup>C-NMR** (150 MHz, CDCl<sub>3</sub>) δ: 169.6 (s), 169.2 (s), 139.0 (s), 133.2 (s), 133.2 (s), 129.4 (s), 129.3 (s), 128.8 (s), 125.9 (s), 125.9 (s), 125.8 (s), 125.8 (s), 120.6 (m), 104.82 (m), 42.4 (s), 42.2 (s), 32.4 (s), 21.2 (s), 8.0 (s).

**<sup>19</sup>F-NMR** (565 MHz, CDCl<sub>3</sub>) δ: -80.7 (s), -80.7 (s).

**HRMS (ESI)**, m/z: calc. for C<sub>12</sub>H<sub>13</sub>BrF<sub>3</sub>N<sub>2</sub>O<sup>+</sup>: 337,0158 [M+H]<sup>+</sup>; found: 337,0159.

**5-(bromomethyl)-3-(4-chlorophenyl)-2-methyl-5-(trifluoromethyl)-2,5-dihydro-1,2,4-oxadiazole (19) and 5-(bromomethyl)-3-(4-chlorophenyl)-4-methyl-5-(trifluoromethyl)-4,5-dihydro-1,2,4-oxadiazole (19a)**

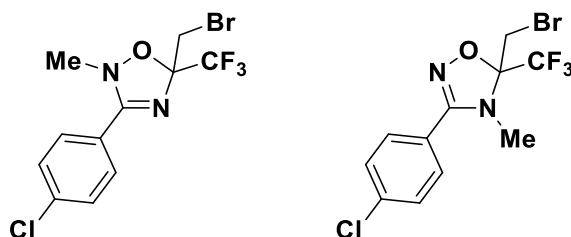

By following the general procedure 1 (GP1), starting from 3-(4-chlorophenyl)-5-(trifluoromethyl)-1,2,4-oxadiazole (248.6 mg, 1.0 mmol, 1.0 equiv), bromiodomethane (662.5 mg, 0.22 mL, 3.0 mmol, 3.0 equiv) and MeLi-LiBr complex (1.27 mL of a solution 2.2 M in Et<sub>2</sub>O, 2.8 mmol, 2.8 equiv) in THF (5 mL), compound **19-19a** was obtained in 87% yield (311.1 mg) as yellow solid (m.p.: 61-71 °C) after chromatography on silica gel (98:2 v/v, petroleum ether/ethyl acetate). Ratio 1:0.9

**<sup>1</sup>H-NMR** (600 MHz, CDCl<sub>3</sub>) δ: 7.72 – 7.68 (m, 3.8 H in total), 7.48 – 7.44 (m, 3.8 H in total), 3.92 (d, 0.9 H, J = 10.8 Hz), 3.83 (d, 1 H, J = 11.8 Hz), 3.70 (d, 0.9 H, J = 11.6 Hz), 3.60 (d, 1 H, J = 11.6 Hz), 3.23 (s, 3 H), 3.19 (s, 2.9 H).

**<sup>13</sup>C-NMR** (150 MHz, CDCl<sub>3</sub>) δ: 168.4 (s), 168.1 (s), 138.8 (s), 138.8 (s), 130.2 (s), 130.2 (s), 129.3 (s), 124.4 (s), 124.3 (s), 120.0 (m), 105.0 (m), 42.4 (s), 42.2 (s), 32.3 (s), 7.8 (s).

**<sup>19</sup>F-NMR** (565 MHz, CDCl<sub>3</sub>) δ: -80.6 (s), -80.7 (s).

**HRMS (ESI)**, m/z: calc. for C<sub>11</sub>H<sub>10</sub>BrClF<sub>3</sub>N<sub>2</sub>O<sup>+</sup>: 356,9612 [M+H]<sup>+</sup>; found: 356,9614.



**4-(5-(bromomethyl)-2-methyl-5-(trifluoromethyl)-2,5-dihydro-1,2,4-oxadiazol-3-yl)benzonitrile (20) and 4-(5-(bromomethyl)-4-methyl-5-(trifluoromethyl)-4,5-dihydro-1,2,4-oxadiazol-3-yl)benzonitrile (20a)**

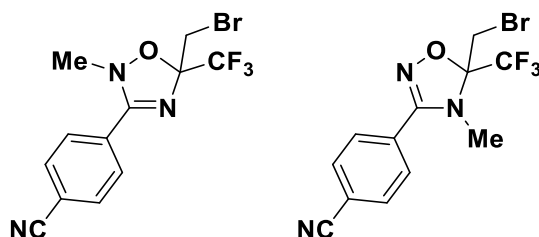

By following the general procedure 1 (GP1), starting from 4-(5-(trifluoromethyl)-1,2,4-oxadiazol-3-yl)benzonitrile (239.2 mg, 1.0 mmol, 1.0 equiv), bromiodomethane (662.5 mg, 0.22 mL, 3.0 mmol, 3.0 equiv) and MeLi-LiBr complex (1.27 mL of a solution 2.2 M in Et<sub>2</sub>O, 2.8 mmol, 2.8 equiv) in THF (5 mL), compound **20-20a** was obtained in 83% yield (288.9 mg) as yellow solid (m.p.: 110-116 °C) after chromatography on silica gel (90:10 v/v, petroleum ether/ethyl acetate). Ratio 1:1.5

<sup>1</sup>H-NMR (600 MHz, CDCl<sub>3</sub>) δ: 7.89 – 7.86 (m, 3.6 H in total), 7.79 (m, 3.6 H in total), 3.92 (d, 1 H, J = 11.6 Hz), 3.84 (d, 0.8 H, J = 11.6 Hz), 3.71 (d, 1 H, J = 11.6 Hz), 3.60 (d, 0.8 H, J = 11.5 Hz), 3.24 (s, 2.4 H), 3.20 (s, 3 H).

<sup>13</sup>C-NMR (150 MHz, CDCl<sub>3</sub>) δ: 167.6 (s), 167.3 (s), 132.7 (s), 130.2 (s), 130.1 (s), 129.5 (s), 129.5 (s), 121.3 (q, J = 288.8 Hz), 117.6 (s), 116.1 (s), 116.1 (s), 105.5 (q, J = 30.4 Hz), 42.1 (s), 41.9 (s), 32.1 (s), 7.5 (s).

<sup>19</sup>F-NMR (565 MHz, CDCl<sub>3</sub>) δ: -80.6 (s).

HRMS (ESI), m/z: calc. for C<sub>12</sub>H<sub>10</sub>BrF<sub>3</sub>N<sub>3</sub>O<sup>+</sup>: 347,9954 [M+H]<sup>+</sup>; found: 347,9956.

**5-(bromomethyl)-2-methyl-3-(4-nitrophenyl)-5-(trifluoromethyl)-2,5-dihydro-1,2,4-oxadiazole (21) and 5-(bromomethyl)-4-methyl-3-(4-nitrophenyl)-5-(trifluoromethyl)-4,5-dihydro-1,2,4-oxadiazole (21a)**

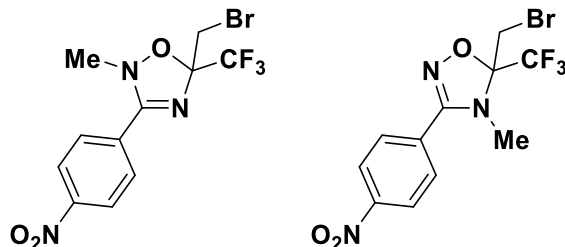

By following the general procedure 1 (GP1), starting from 3-(4-nitrophenyl)-5-(trifluoromethyl)-1,2,4-oxadiazole (259.1 mg, 1.0 mmol, 1.0 equiv), bromiodomethane (662.5 mg, 0.22 mL, 3.0 mmol, 3.0 equiv) and MeLi-LiBr complex (1.27 mL of a solution 2.2 M in Et<sub>2</sub>O, 2.8 mmol, 2.8 equiv) in THF (5 mL), compound **21-21a** was obtained in 82% yield (301.8 mg) as orange solid (m.p.: 84-91 °C) after chromatography on silica gel (92:8 v/v, petroleum ether/ethyl acetate). Ratio 1:1.5

<sup>1</sup>H-NMR (600 MHz, CDCl<sub>3</sub>) δ: 8.36 – 8.32 (m, 3.2 H in total), 7.97 – 7.94 (m, 3.2 H in total), 3.94 (dd, 1H, J = 11.6, 0.5 Hz), 3.86 (dd, 0.7 H, J = 11.6, 0.5 Hz), 3.72 (d, 1H, J = 11.4 Hz), 3.62 (d, 0.7 H, J = 11.6 Hz), 3.25 (s, 2.1 H), 3.22 (s, 3H).

<sup>13</sup>C-NMR (150 MHz, CDCl<sub>3</sub>) δ: 167.3 (s), 167.0 (s), 150.1 (s), 131.8 (s), 131.7 (s), 130.1 (s), 130.0 (s), 124.1 (s), 120.4 (m), 106.5 – 104.0 (m), 42.1 (s), 41.9 (s), 32.1 (s), 7.5 (s).

<sup>19</sup>F-NMR (565 MHz, CDCl<sub>3</sub>) δ: -80.6 (s), -80.6 (s).

HRMS (ESI), m/z: calc. for C<sub>11</sub>H<sub>10</sub>BrF<sub>3</sub>N<sub>3</sub>O<sub>3</sub><sup>+</sup>: 367,9852 [M+H]<sup>+</sup>; found: 367,9850.



**5-(bromomethyl)-2-methyl-3-(pyridin-2-yl)-5-(trifluoromethyl)-2,5-dihydro-1,2,4-oxadiazole (22) and 5-(bromomethyl)-4-methyl-3-(pyridin-2-yl)-5-(trifluoromethyl)-4,5-dihydro-1,2,4-oxadiazole (22a)**

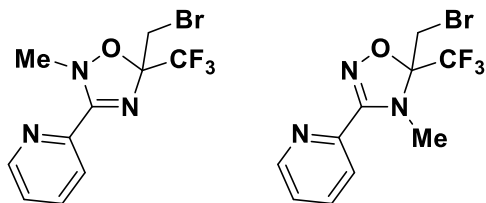

By following the general procedure 1 (GP1), starting from 3-(pyridin-2-yl)-5-(trifluoromethyl)-1,2,4-oxadiazole (215.1 mg, 1.0 mmol, 1.0 equiv), bromiodomethane (662.5 mg, 0.22 mL, 3.0 mmol, 3.0 equiv) and MeLi-LiBr complex (1.27 mL of a solution 2.2 M in Et<sub>2</sub>O, 2.8 mmol, 2.8 equiv) in THF (5 mL), compound **22-22a** was obtained in 84% yield (272.2 mg) as yellow oi after chromatography on silica gel (87:13 v/v, petroleum ether/ethyl acetate). Ratio 1:4

**<sup>1</sup>H-NMR** (600 MHz, CDCl<sub>3</sub>) δ: 8.69 (d, 1.2 H in total, J = 4.7 Hz), 8.16 (d, 1.2 H in total, J = 7.9 Hz), 7.87 – 7.80 (m, 1.2 H in total), 7.48 – 7.43 (m, 1.2 H in total), 3.91 (d, 1 H, J = 11.6 Hz), 3.83 (d, 0.2 H, J = 11.4 Hz), 3.72 (d, 1 H, J = 11.6 Hz), 3.62 (d, 0.2 H, J = 11.5 Hz), 3.58 (s, 0.7 H), 3.55 (s, 3 H).

**<sup>13</sup>C-NMR** (150 MHz, CDCl<sub>3</sub>) δ: 166.3 (s), 165.9 (s), 149.3 (s), 145.7 (s), 145.6 (s), 137.0 (s), 126.3 (s), 125.3 (s), 121.5 (q, J = 288.9 Hz), 104.5 (q, J = 30.4 Hz), 42.0 (s), 41.8 (s), 32.3 (s).

**<sup>19</sup>F-NMR** (565 MHz, CDCl<sub>3</sub>) δ: -80.7 (s).

**HRMS (ESI)**, m/z: calc. for C<sub>10</sub>H<sub>10</sub>BrF<sub>3</sub>N<sub>3</sub>O<sup>+</sup>: 323,9954 [M+H]<sup>+</sup>; found: 323,9972.

**5-(bromomethyl)-2-methyl-3-(thiophen-2-yl)-5-(trifluoromethyl)-2,5-dihydro-1,2,4-oxadiazole (23) and 5-(bromomethyl)-4-methyl-3-(thiophen-2-yl)-5-(trifluoromethyl)-4,5-dihydro-1,2,4-oxadiazole (23a)**

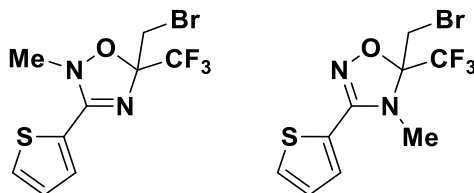

By following the general procedure 1 (GP1), starting from 3-(thiophen-2-yl)-5-(trifluoromethyl)-1,2,4-oxadiazole (220.2 mg, 1.0 mmol, 1.0 equiv), bromiodomethane (662.5 mg, 0.22 mL, 3.0 mmol, 3.0 equiv) and MeLi-LiBr complex (1.27 mL of a solution 2.2 M in Et<sub>2</sub>O, 2.8 mmol, 2.8 equiv) in THF (5 mL), compound **23-23a** was obtained in 89% yield (292.9 mg) as white solid (m.p.: 65-69 °C) after chromatography on silica gel (95:5 v/v, petroleum ether/ethyl acetate). Ratio 1:0.9

**<sup>1</sup>H-NMR** (600 MHz, CDCl<sub>3</sub>) δ: 7.60 (m, 1.7 in total), 7.57 – 7.55 (m, 1.7 in total), 7.17 – 7.13 (m, 1.7 in total), 3.90 (d, 0.7 H, J = 11.6 Hz), 3.82 (d, 1 H, J = 11.5 Hz), 3.70 (d, 0.7 H, J = 11.6 Hz), 3.60 (d, 1 H J = 11.5 Hz), 3.37 (s, 3 H), 3.34 (s, 2.1 H).

**<sup>13</sup>C-NMR** (150 MHz, CDCl<sub>3</sub>) δ: 163.6 (s), 163.3 (s), 131.7 (s), 131.6 (s), 131.5 (s), 131.4 (s), 128.0 (s), 127.1 (s), 127.0 (s), 120.6 (m), 104.7 (m), 43.4 (s), 43.3 (s), 32.1 (s), 7.6 (s).

**<sup>19</sup>F-NMR** (565 MHz, CDCl<sub>3</sub>) δ: -80.5 (s), -80.5 (s).

**HRMS (ESI)**, m/z: calc. for C<sub>9</sub>H<sub>9</sub>BrF<sub>3</sub>N<sub>2</sub>OS<sup>+</sup>: 328,9566 [M+H]<sup>+</sup>; found: 328,9566.



**3-(4-bromophenyl)-5-(iodomethyl)-4-(methyl-d3)-5-(trifluoromethyl)-4,5-dihydro-1,2,4-oxadiazole (24)**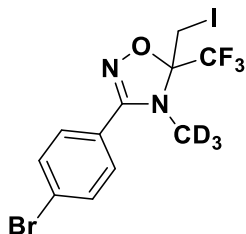

By following the general procedure 1 (GP1), starting from 3-(4-bromophenyl)-5-(trifluoromethyl)-1,2,4-oxadiazole (293.4 mg, 1.0 mmol, 1.0 equiv), diiodomethane (903.5 mg, 0.24 mL, 3.0 mmol, 3.0 equiv) and  $\text{CD}_3\text{Li-LiI}$  complex (5.6 mL of a solution 0.5 M in  $\text{Et}_2\text{O}$ , 2.8 mmol, 2.8 equiv) in THF (5 mL), compound **24** was obtained in 85% yield (384.2 mg) as yellow solid (m.p.: 70 °C) after chromatography on silica gel (97:3 v/v, petroleum ether/ethyl acetate).

**$^1\text{H-NMR}$**  (600 MHz,  $\text{CDCl}_3$ )  $\delta$ : 7.63 (br s, 4H), 3.84 (d, 1H,  $J = 11.4$  Hz), 3.60 (d, 1H,  $J = 11.5$  Hz), 3.23 (br, residual non-deuterated  $-\text{CH}_3$ ).

**$^{13}\text{C-NMR}$**  (150 MHz,  $\text{CDCl}_3$ )  $\delta$ : 168.2 (s), 132.3 (s), 130.3 (s), 127.2 (s), 124.8 (s), 119.7 (q,  $J = 288.8$  Hz), 104.9 (q,  $J = 30.4$  Hz), 42.2 (br,  $\text{CD}_3$ ), 7.8 (s).

**$^{19}\text{F-NMR}$**  (565 MHz,  $\text{CDCl}_3$ )  $\delta$ : -80.6 (s).

**HRMS (ESI)**,  $m/z$ : calc. for  $\text{C}_{11}\text{H}_7\text{D}_3\text{BrF}_3\text{IN}_2\text{O}^+$ : 451,9156  $[\text{M}+\text{H}]^+$ ; found: 451,9157.

**3-(pyridin-4-yl)-5-(trifluoromethyl)-5-((trimethylsilyl)methyl)-2,5-dihydro-1,2,4-oxadiazole (25)**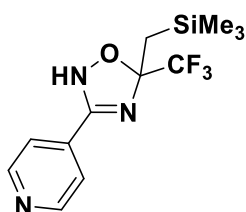

By following the general procedure 4 (GP4), starting from 3-(pyridin-4-yl)-5-(trifluoromethyl)-1,2,4-oxadiazole (215.1 mg, 1.0 mmol, 1.0 equiv), and (trimethylsilyl)methyl lithium solution (1.1 mL of a solution 1.0 M in pentane, 1.1 mmol, 1.1 equiv) in THF (5 mL), compound **25** was obtained in 87% yield (264.3 mg) as yellow solid (m.p.: 89°C) after chromatography on silica gel (8:2 v/v, petroleum ether/ethyl acetate).

**$^1\text{H-NMR}$**  (600 MHz,  $\text{CDCl}_3$ )  $\delta$ : 8.57 (d, 2H,  $J = 5.9$  Hz), 7.55 (dd, 2H,  $J = 4.5, 1.7$  Hz), 6.92 (br, 1H), 1.54 (d, 1H,  $J = 15.4$  Hz), 1.34 (d, 1H,  $J = 15.4$  Hz), 0.09 (s, 9H).

**$^{13}\text{C-NMR}$**  (150 MHz,  $\text{CDCl}_3$ )  $\delta$ : 153.9 (s), 15.0 (s), 132.6 (s), 123.2 (Q,  $J = 289.8$  Hz), 120.7 (s), 97.8 (q,  $J = 32.2$  Hz), 21.3 (s), -0.7 (s).

**$^{19}\text{F-NMR}$**  (565 MHz,  $\text{CDCl}_3$ )  $\delta$ : -87.0 (s).

**HRMS (ESI)**,  $m/z$ : calc. for  $\text{C}_{12}\text{H}_{17}\text{F}_3\text{N}_3\text{OSi}^+$ : 304,1087  $[\text{M}+\text{H}]^+$ ; found: 304,1088.

**3-(4-methoxyphenyl)-5-methyl-5-(trifluoromethyl)-2,5-dihydro-1,2,4-oxadiazole (26)**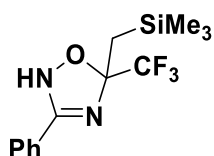

By following the general procedure 4 (GP4), starting from 3-(phenyl)-5-(trifluoromethyl)-1,2,4-oxadiazole (214.2 mg, 1.0 mmol, 1.0 equiv), and (trimethylsilyl)methyl lithium solution (1.1 mL of a solution 1.0 M in pentane, 1.1 mmol, 1.1 equiv), compound **26** was obtained in 83% yield (251.0 mg) as white solid (m.p.: 141°C) after chromatography on silica gel (9:1 v/v, petroleum ether/ethyl acetate).



**<sup>1</sup>H-NMR** (600 MHz, CDCl<sub>3</sub>) δ: 7.66 - 7.63 (m, 2H), 7.47 (t, 1H, J = 7.5 Hz), 7.39 (t, 2H, J = 7.7 Hz), 5.21 (br, 1H), 1.57 (d, 1H, J = 15.4 Hz), 1.38 (d, 1H, J = 15.4 Hz), 0.13 (s, 9H).

**<sup>13</sup>C-NMR** (150 MHz, CDCl<sub>3</sub>) δ: 155.3 (s), 131.4 (s), 128.9 (s), 126.6 (s), 124.2 (s), 123.3 (q, J = 289.9 Hz), 96.7 (q, J = 32.2 Hz), 21.4 (s), -0.6 (s).

**<sup>19</sup>F-NMR** (565 MHz, CDCl<sub>3</sub>) δ: -86.9 (s).

**HRMS (ESI)**, m/z: calc. for C<sub>13</sub>H<sub>17</sub>F<sub>3</sub>N<sub>2</sub>OSi<sup>+</sup>: 303,1135 [M+H]<sup>+</sup>; found: 303,1137.

## 2-(3-phenyl-5-(trifluoromethyl)-2,5-dihydro-1,2,4-oxadiazol-5-yl)acetonitrile (27)

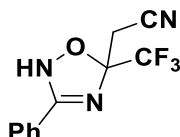

To a solution of dry acetonitrile (82.1 mg, 0.10 mL, 2.0 mmol, 2.0 equiv) in anhydrous THF cooled at -78 °C, MeLi-LiBr (0.68 mL of a solution 2.2 M in THF, 1.5 mmol, 1.5 equiv) was added dropwise during 5 min and the resulting mixture was stirred for 30 min. Then, a solution of 3-(phenyl)-5-(trifluoromethyl)-1,2,4-oxadiazole (214.2 mg, 1.0 mmol, 1.0 equiv) in THF (3 mL) was added and the stirring was continued for additional 1.5 hour at -78 °C. A solution of saturated aqueous NH<sub>4</sub>Cl was added and after removing of the cooling-bath the system was allowed to reach rt. The resulting mixture was extracted 3 times with Et<sub>2</sub>O, the organic phase was washed with brine, dried over anhydrous Na<sub>2</sub>SO<sub>4</sub> and concentrated in vacuo. Compound **27** was obtained in 92% yield (234.8 mg) as white solid (m.p.: 175 °C) after chromatography on silica gel (85:15 v/v, petroleum ether/ethyl acetate).

**<sup>1</sup>H-NMR** (400 MHz, Acetone-*d*<sub>6</sub>) δ: 8.13 (br, 1H), 7.82 - 7.75 (m, 2H), 7.59 - 7.46 (m, 3H), 3.49 (s, 2H).

**<sup>13</sup>C-NMR** (100 MHz, Acetone-*d*<sub>6</sub>) δ: 156.5 (s), 132.4 (s), 129.8 (s), 127.5 (s), 124.5 (s), 123.2 (q, J = 288.3 Hz), 114.7 (s), 95.0 (q, J = 33.1 Hz), 24.2 (s).

**<sup>19</sup>F-NMR** (377 MHz, Acetone-*d*<sub>6</sub>) δ: -85.0 (s).

**HRMS (ESI)**, m/z: calc. for C<sub>13</sub>H<sub>17</sub>F<sub>3</sub>N<sub>2</sub>O<sup>+</sup>: 303,1135 [M+H]<sup>+</sup>; found: 303,1137.

## 5-(methoxymethyl)-3-phenyl-5-(trifluoromethyl)-2,5-dihydro-1,2,4-oxadiazole (28)

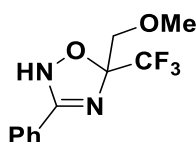

Lithium metal (48.6 mg, 7.0 mmol, 7.0 equiv) was suspended in dry THF and DTBB (13.3 mg, 0.05 mmol, 0.05 equiv) was added and the mixture was stirred until the appearance of the dark green colour. This suspension was cooled down to -78 °C and then ClCH<sub>2</sub>OCH<sub>3</sub> (161.0 mg, 0.15 mL, 2.0 mmol, 2.0 equiv) was added dropwise. A 1.0 M solution of 3-(phenyl)-5-(trifluoromethyl)-1,2,4-oxadiazole (214.2 mg, 1.0 mmol, 1.0 equiv) in dry THF (2 mL) was added and the mixture was stirred at -78 °C for 3 hours. A solution of saturated aqueous NH<sub>4</sub>Cl was added and after removing of the cooling-bath the system was allowed to reach rt. The resulting mixture was extracted 3 times with Et<sub>2</sub>O, the organic phase was washed with brine, dried over anhydrous Na<sub>2</sub>SO<sub>4</sub> and concentrated in vacuo. Compound **28** was obtained in 89% yield (231.6 mg) as white solid (m.p.: 133 °C) after chromatography on silica gel (88:12 v/v, petroleum ether/ethyl acetate).

**<sup>1</sup>H-NMR** (400 MHz, Acetone-*d*<sub>6</sub>) δ: 7.82 - 7.76 (m, 2H), 7.57 - 7.45 (m, 3H), 7.38 (br, 1H), 3.89 (d, J = 11.4 Hz, 1H), 3.78 (d, J = 11.4 Hz, 1H), 3.43 (s, 3H).

**<sup>13</sup>C-NMR** (100 MHz, Acetone-*d*<sub>6</sub>) δ: 156.6 (s), 132.0 (s), 129.7 (s), 127.6 (s), 125.7 (s), 124.0 (q, J = 288.2 Hz), 97.2 (q, J = 30.9 Hz), 70.5 (s), 60.1 (s).

**<sup>19</sup>F-NMR** (377 MHz, Acetone-*d*<sub>6</sub>) δ: -84.2 (s).

**HRMS (ESI)**, m/z: calc. for C<sub>11</sub>H<sub>11</sub>F<sub>3</sub>N<sub>2</sub>O<sub>2</sub><sup>+</sup>: 261,0845 [M+H]<sup>+</sup>; found: 261,0845.



### 5-((methylthio)methyl)-3-phenyl-5-(trifluoromethyl)-2,5-dihydro-1,2,4-oxadiazole (29)

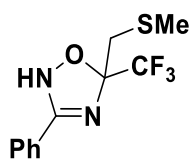

Lithium metal (48.6 mg, 7.0 mmol, 7.0 equiv) was suspended in dry THF and DTBB (13.3 mg, 0.05 mmol, 0.05 equiv) was added and the mixture was stirred until the appearance of the dark green colour. This suspension was cooled down to -78 °C and then ClCH<sub>2</sub>SCH<sub>3</sub> (197.2 mg, 0.17 mL, 2.0 mmol, 2.0 equiv) was added dropwise and the solution was stirred for 10 min. A 1.0 M solution of 3-(phenyl)-5-(trifluoromethyl)-1,2,4-oxadiazole (214.2 mg, 1.0 mmol, 1.0 equiv) in dry THF (2 mL) was added and the mixture was stirred at -78 °C for 3 hours. A solution of saturated aqueous NH<sub>4</sub>Cl was added and after removing of the cooling-bath the system was allowed to reach rt. The resulting mixture was extracted 3 times with Et<sub>2</sub>O, the organic phase was washed with brine, dried over anhydrous Na<sub>2</sub>SO<sub>4</sub> and concentrated in vacuo. Compound **29** was obtained in 85% yield (234.9 mg) as white solid (m.p.: 177 °C) after chromatography on silica gel (9:1 v/v, petroleum ether/ethyl acetate).

**<sup>1</sup>H-NMR** (400 MHz, Acetone-*d*<sub>6</sub>) δ: 7.78 (m, 2H), 7.52 (m, 3H), 7.43 (br, 1H), 3.21 (d, *J* = 15.2 Hz, 1H), 3.10 (d, *J* = 15.1 Hz, 1H), 2.27 (s, 3H).

**<sup>13</sup>C-NMR** (100 MHz, Acetone-*d*<sub>6</sub>) δ: 156.8 (s), 132.0 (s), 129.6 (s), 127.4 (s), 125.4 (s), 124.1 (q, *J* = 288.9 Hz), 98.5 (q, *J* = 30.7 Hz), 36.6 (s), 17.5 (s).

**<sup>19</sup>F-NMR** (377 MHz, Acetone-*d*<sub>6</sub>) δ: -84.7 (s).

**HRMS (ESI)**, *m/z*: calc. for C<sub>11</sub>H<sub>11</sub>F<sub>3</sub>N<sub>2</sub>OS<sup>+</sup>: 277,0617 [M+H]<sup>+</sup>; found: 277,0617.

### 3-phenyl-5-((phenylselanyl)methyl)-5-(trifluoromethyl)-2,5-dihydro-1,2,4-oxadiazole (30)

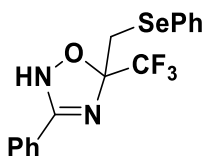

To a solution of 1,1'-(methylenediselanyl)dibenzene (0.212 g, 0.65 mmol, 1.3 equiv) in dry Et<sub>2</sub>O (2 mL) at -78 °C under argon was added dropwise *n*-BuLi (0.5 mL of a solution 2.5 M in hexane, 1.25 mmol, 1.25 equiv) and the reaction mixture was stirred at -78 °C for 1 hour. Afterwards, a solution of 3-(phenyl)-5-(trifluoromethyl)-1,2,4-oxadiazole (214.2 mg, 1.0 mmol, 1.0 equiv) in dry Et<sub>2</sub>O (2 mL) was added and the mixture was stirred at -78 °C for 1 hour. A solution of saturated aqueous NH<sub>4</sub>Cl was added and after removing of the cooling-bath the system was allowed to reach rt. The resulting mixture was extracted 3 times with Et<sub>2</sub>O, the organic phase was washed with brine, dried over anhydrous Na<sub>2</sub>SO<sub>4</sub> and concentrated in vacuo. Compound **30** was obtained in 91% yield (350.6 mg) as white solid (m.p.: 121 °C) after chromatography on silica gel (9:1 v/v, petroleum ether/ethyl acetate).

**<sup>1</sup>H-NMR** (400 MHz, Acetone-*d*<sub>6</sub>) δ: 7.78 – 7.73 (m, 2H), 7.68 – 7.59 (m, 2H), 7.59 – 7.46 (m, 4H), 7.32 – 7.26 (m, 3H), 3.65 (d, *J* = 13.9 Hz, 1H), 3.58 (d, *J* = 13.9 Hz, 1H).

**<sup>13</sup>C-NMR** (100 MHz, Acetone-*d*<sub>6</sub>) δ: 156.5 (s), 133.8 (s), 132.1 (s), 130.7 (s), 130.0 (s), 129.7 (s), 128.2 (s), 127.5 (s), 125.4 (s), 123.9 (q, *J* = 289.2 Hz), 97.4 (q, *J* = 31.2 Hz), 31.3.

**<sup>19</sup>F-NMR** (377 MHz, Acetone-*d*<sub>6</sub>) δ: -84.4 (s).

**HRMS (ESI)**, *m/z*: calc. for C<sub>16</sub>H<sub>14</sub>F<sub>3</sub>N<sub>2</sub>OSe<sup>+</sup>: 387,0218 [M+H]<sup>+</sup>; found: 387,0214.

### 3-phenyl-5,5-bis(trifluoromethyl)-2,5-dihydro-1,2,4-oxadiazole (31)

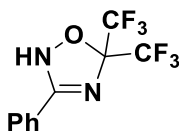



To a solution of 3-(phenyl)-5-(trifluoromethyl)-1,2,4-oxadiazole (214.2 mg, 1.0 mmol, 1.0 equiv) in dry THF (5 mL) cooled at 0 °C (trifluoromethyl)trimethylsilane (284.4 mg, 0.29 mL, 2.0 mmol, 2.0 equiv) was added under Argon atmosphere. Then potassium tert-pentoxide (0.9 mL of a solution 2.0 M in THF, 1.8 mmol, 1.8 equiv) was added dropwise at 0 °C over 15 min and the reaction mixture was further stirred for additional 4 hours at the same temperature. A solution of saturated aqueous NH<sub>4</sub>Cl was added and the resulting mixture was extracted 3 times with Et<sub>2</sub>O, the organic phase was washed with brine, dried over anhydrous Na<sub>2</sub>SO<sub>4</sub> and concentrated in vacuo. Compound **31** was obtained in 88% yield (250.1 mg) as white solid (m.p.: 129 °C) after chromatography on silica gel (9:1 v/v, petroleum ether/ethyl acetate).

**<sup>1</sup>H-NMR** (400 MHz, Acetone-*d*<sub>6</sub>) δ: 9.64 (br, 1H), 7.95 – 7.88 (m, 2H), 7.67 (t, *J* = 7.4 Hz, 1H), 7.56 (t, *J* = 7.8 Hz, 2H).

**<sup>13</sup>C-NMR** (100 MHz, Acetone-*d*<sub>6</sub>) δ: 158.7 (s), 134.0 (s), 132.7 (s), 129.7 (s), 128.7 (s), 121.7 (q, *J* = 289.2 Hz), 86.9 (br).

**<sup>19</sup>F-NMR** (377 MHz, Acetone-*d*<sub>6</sub>) δ: -79.7 (s), -80.6 (s)

**HRMS (ESI)**, *m/z*: calc. for C<sub>10</sub>H<sub>7</sub>F<sub>6</sub>N<sub>2</sub>O<sup>+</sup>: 285,0457 [M+H]<sup>+</sup>; found: 285,0456.

### 5-(difluoromethyl)-3-phenyl-5-(trifluoromethyl)-2,5-dihydro-1,2,4-oxadiazole (**32**)

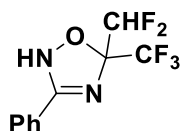

To a solution of 3-(phenyl)-5-(trifluoromethyl)-1,2,4-oxadiazole (214.2 mg, 1.0 mmol, 1.0 equiv) in dry THF (5 mL) cooled at 0 °C (difluoromethyl)trimethylsilane (248.4 mg, 0.28 mL, 2.0 mmol, 2.0 equiv) was added under Argon atmosphere. Then potassium tert-pentoxide (0.9 mL of a solution 2.0 M in THF, 1.8 mmol, 1.8 equiv) was added dropwise at 0 °C over 15 min and the reaction mixture was further stirred for additional 4 hours at the same temperature. A solution of saturated aqueous NH<sub>4</sub>Cl was added and the resulting mixture was extracted 3 times with Et<sub>2</sub>O, the organic phase was washed with brine, dried over anhydrous Na<sub>2</sub>SO<sub>4</sub> and concentrated in vacuo. Compound **32** was obtained in 87% yield (231.6 mg) as white solid (m.p.: 121 °C) after chromatography on silica gel (9:1 v/v, petroleum ether/ethyl acetate).

**<sup>1</sup>H-NMR** (400 MHz, Acetone-*d*<sub>6</sub>) δ: 8.32 (br, 1H), 7.84 – 7.78 (m, 2H), 7.63 – 7.45 (m, 3H), 6.46 (t, *J* = 53.1 Hz, 1H).

**<sup>13</sup>C-NMR** (100 MHz, Acetone-*d*<sub>6</sub>) δ: 156.7 (s), 132.6 (s), 129.9 (s), 127.8 (s), 124.4 (s), 122.8 (q, *J* = 289.8 Hz), 111.9 (t, *J* = 249.9 Hz), 94.9 (br, m).

**<sup>19</sup>F-NMR** (377 MHz, Acetone-*d*<sub>6</sub>) δ: -81.6 (s) -134.3 (dd, *J* = 299.5, 53.4 Hz), -136.7 (dd, *J* = 299.5, 53.4 Hz).

**HRMS (ESI)**, *m/z*: calc. for C<sub>10</sub>H<sub>8</sub>F<sub>5</sub>N<sub>2</sub>O<sup>+</sup>: 267,0551 [M+H]<sup>+</sup>; found: 267,0550.

### 3-(4-methoxyphenyl)-5-methyl-5-(trifluoromethyl)-2,5-dihydro-1,2,4-oxadiazole (**33**)

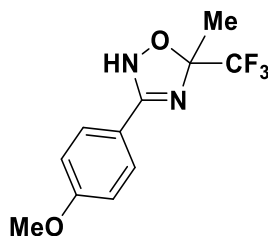

By following the general procedure 2 (GP2), starting from 3-(4-methoxyphenyl)-5-(trifluoromethyl)-1,2,4-oxadiazole (244.2 mg, 1.0 mmol, 1.0 equiv), and MeLi (0.68 mL of a solution 1.6 M in Et<sub>2</sub>O, 1.1 mmol, 1.1 equiv) in THF (5 mL), compound **33** was obtained in 95% yield (247.2 mg) as white solid (m.p.: 86 °C) after filtration on silica pad.

**<sup>1</sup>H-NMR** (600 MHz, Acetone-*d*<sub>6</sub>) δ: 7.70-7.65 (m, 2H), 7.24 (br, 1H), 7.05-6.99 (m, 2H), 3.85 (s, 3H), 1.74-1.70 (br q, 3H).



**<sup>13</sup>C-NMR** (150 MHz, Acetone-*d*<sub>6</sub>) δ: 162.9 (s), 155.9 (s), 129.1 (s), 124.6 (q, *J* = 288.1 Hz), 118.0 (s), 115.0 (s), 95.3 (q, *J* = 32.0 Hz), 55.8 (s), 19.6 (s).

**<sup>19</sup>F-NMR** (565 MHz, Acetone-*d*<sub>6</sub>) δ: -86.7 (s).

**HRMS (ESI)**, *m/z*: calc. for C<sub>11</sub>H<sub>12</sub>F<sub>3</sub>N<sub>2</sub>O<sub>2</sub><sup>+</sup>: 261,0845 [M+H]<sup>+</sup>; found: 261,0845.

#### 5-butyl-3-phenyl-5-(trifluoromethyl)-2,5-dihydro-1,2,4-oxadiazole (34)

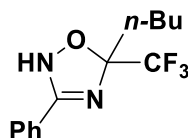

By following the general procedure 2 (GP2), starting from 3-(phenyl)-5-(trifluoromethyl)-1,2,4-oxadiazole (214.2 mg, 1.0 mmol, 1.0 equiv), and *n*-BuLi (0.44 mL of a solution 2.5 M in hexane, 1.1 mmol, 1.1 equiv) in THF (5 mL), compound **34** was obtained in 96% yield (261.4 mg) as white solid (m.p.: 148 °C) after filtration on silica pad.

**<sup>1</sup>H-NMR** (600 MHz, Acetone-*d*<sub>6</sub>) δ: 7.76 (m, 2H), 7.56-7.50 (m, 1H), 7.50-7.45 (m, 2H), 7.39 (br, 1H), 2.03-1.98 (m, 2H), 1.52 (m, 2H), 1.46-1.33 (m, 2H), 0.90 (t, 3H, *J* = 7.3 Hz).

**<sup>13</sup>C-NMR** (150 MHz, Acetone-*d*<sub>6</sub>) δ: 156.2 (s), 131.9 (s), 129.6 (s), 127.4 (s), 125.6 (s), 124.6 (q, *J* = 288.7 Hz), 97.8 (q, *J* = 31.0 Hz), 31.4 (s), 24.2 (s), 23.0 (s), 14.2 (s).

**<sup>19</sup>F-NMR** (565 MHz, Acetone-*d*<sub>6</sub>) δ: -86.0 (s).

**HRMS (ESI)**, *m/z*: calc. for C<sub>13</sub>H<sub>16</sub>F<sub>3</sub>N<sub>2</sub>O<sup>+</sup>: 273,1209 [M+H]<sup>+</sup>; found: 273,1209.

#### 5-(*sec*-butyl)-3-phenyl-5-(trifluoromethyl)-2,5-dihydro-1,2,4-oxadiazole (35)

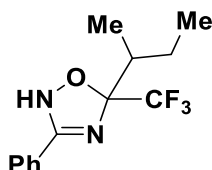

By following the general procedure 2 (GP2), starting from 3-(phenyl)-5-(trifluoromethyl)-1,2,4-oxadiazole (214.2 mg, 1.0 mmol, 1.0 equiv), and *sec*-BuLi (0.78 mL of a solution 1.4 M in cyclohexane, 1.1 mmol, 1.1 equiv) in THF (5 mL), compound **35** was obtained in 94% yield (256.0 mg) as white solid (m.p.: 134-138 °C) after filtration on silica pad.

**<sup>1</sup>H-NMR** (400 MHz, Acetone-*d*<sub>6</sub>) δ: 7.50 (m, 2H), 7.21 (m, 3H), 7.07 (br, 1H), 1.84 (m, 1H), 1.55 (m, 1H), 1.12 - 0.92 (m, 1H), 0.90 - 0.81 (m, 3H), 0.70 (m, 3H).

**<sup>13</sup>C-NMR** (100 MHz, Acetone-*d*<sub>6</sub>) δ: 156.21 (s), 156.18 (s), 131.88 (s), 129.56 (s), 127.49 (s), 125.67 (s), 125.1 (q, *J* = 209.7 Hz), 125.0 (q, *J* = 209.7 Hz), 99.9 (q, *J* = 29.4 Hz), 100.1 (q, *J* = 29.4 Hz), 39.51 (s), 39.38 (s), 23.21 (br q, *J* = 2.1 Hz), 23.03 (br q, *J* = 1.5 Hz), 12.78 (q, *J* = 1.9 Hz), 12.25 (q, *J* = 1.8 Hz), 12.02 (s), 11.90 (s).

**<sup>19</sup>F-NMR** (377 MHz, Acetone-*d*<sub>6</sub>) δ: -80.8 (s), 81.3 (s).

**HRMS (ESI)**, *m/z*: calc. for C<sub>13</sub>H<sub>16</sub>F<sub>3</sub>N<sub>2</sub>O<sup>+</sup>: 273,1209 [M+H]<sup>+</sup>; found: 273,1209.

#### 4-(5-hexyl-5-(trifluoromethyl)-2,5-dihydro-1,2,4-oxadiazol-3-yl)-*N,N*-dimethylaniline (36)

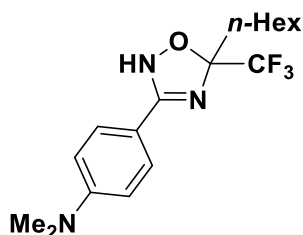



By following the general procedure 2 (GP2), starting from *N,N*-dimethyl-4-(5-phenyl-5-(trifluoromethyl)-2,5-dihydro-1,2,4-oxadiazol-3-yl)aniline (335.3 mg, 1.0 mmol, 1.0 equiv), and *n*-HexLi (0.48 mL of a solution 2.3 M in hexane, 1.1 mmol, 1.1 equiv) in THF (5 mL), compound **36** was obtained in 93% yield (319.4 mg) as white solid (m.p.: 184 °C) after filtration on silica pad.

**<sup>1</sup>H-NMR** (600 MHz, Acetone-*d*<sub>6</sub>) δ: 7.58 - 7.53 (m, 2H), 7.09 (br, 1H), 6.78 - 6.71 (m, 2H), 3.00 (s, 3H), 2.00 - 1.90 (m, 2H), 1.60 - 1.45 (m, 2H), 1.42 - 1.32 (m, 2H), 1.31 - 1.23 (m, 2H), 0.86 (t, 3H, *J* = 7.1 Hz).

**<sup>13</sup>C-NMR** (150 MHz, Acetone-*d*<sub>6</sub>) δ: 156.2 (s), 153.1 (s), 128.5 (s), 124.8 (q, *J* = 288.9 Hz), 112.3 (s), 97.0 (q, *J* = 30.6 Hz), 40.1 (s), 32.3 (s), 31.7 (s), 29.6 (s), 23.1 (s), 22.0 (s), 14.2 (s).

**<sup>19</sup>F-NMR** (565 MHz, Acetone-*d*<sub>6</sub>) δ: -85.8 (s).

**HRMS (ESI)**, *m/z*: calc. for C<sub>17</sub>H<sub>25</sub>F<sub>3</sub>N<sub>3</sub>O<sup>+</sup>: 344,1944 [M+H]<sup>+</sup>; found: 344,1946.

### 3,5-diphenyl-5-(trifluoromethyl)-2,5-dihydro-1,2,4-oxadiazole (**37**)

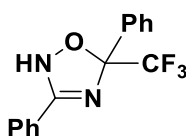

By following the general procedure 2 (GP2), starting from 3-(phenyl)-5-(trifluoromethyl)-1,2,4-oxadiazole (214.2 mg, 1.0 mmol, 1.0 equiv), and PhLi (0.58 mL of a solution 1.9 M in Bu<sub>2</sub>O, 1.1 mmol, 1.1 equiv) in THF (5 mL), compound **37** was obtained in 94% yield (274.8 mg) as white solid (m.p.: 182 °C) after filtration on silica pad.

**<sup>1</sup>H-NMR** (600 MHz, Acetone-*d*<sub>6</sub>) δ: 8.03 (br, 1H), 7.87 - 7.83 (m, 2H), 7.79 - 7.75 (m, 2H), 7.56 - 7.45 (m, 6H).

**<sup>13</sup>C-NMR** (150 MHz, Acetone-*d*<sub>6</sub>) δ: 156.2 (s), 135.7 (s), 132.1 (s), 130.7 (s), 129.6 (s), 129.4 (s), 127.5 (s), 127.0 (s), 125.3 (s), 124.4 (q, *J* = 289.1 Hz), 97.2 (q, *J* = 32.0 Hz).

**<sup>19</sup>F-NMR** (565 MHz, Acetone-*d*<sub>6</sub>) δ: -83.4 (s).

**HRMS (ESI)**, *m/z*: calc. for C<sub>15</sub>H<sub>12</sub>F<sub>3</sub>N<sub>2</sub>O<sup>+</sup>: 293,0896 [M+H]<sup>+</sup>; found: 293,0896.

### 3-phenyl-5-(thiophen-2-yl)-5-(trifluoromethyl)-2,5-dihydro-1,2,4-oxadiazole (**38**)

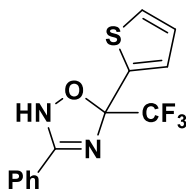

By following the general procedure 2 (GP2), starting from 3-(phenyl)-5-(trifluoromethyl)-1,2,4-oxadiazole (214.2 mg, 1.0 mmol, 1.0 equiv), and 2-thienyllithium (0.11 mL of a solution 1.0 M in THF, 1.1 mmol, 1.1 equiv) in THF (5 mL), compound **38** was obtained in 95% yield (298.3 mg) as white solid (m.p.: 122 °C) after filtration on silica pad.

**<sup>1</sup>H-NMR** (400 MHz, Acetone-*d*<sub>6</sub>) δ: 8.13 (br, 1H), 7.87 - 7.77 (m, 2H), 7.66 (dd, 1H, *J* = 5.1, 1.3 Hz), 7.60 - 7.42 (m, 4H), 7.15 (dd, 1H, *J* = 5.1, 3.7 Hz).

**<sup>13</sup>C-NMR** (100 MHz, Acetone-*d*<sub>6</sub>) δ: 156.0 (s), 138.5 (s), 132.3 (s), 129.7 (s), 129.0 (s), 128.5 (s), 127.6 (s), 125.1 (s), 124.1 (d, *J* = 288.1 Hz), 95.9 (q, *J* = 33.5 Hz).

**<sup>19</sup>F-NMR** (377 MHz, Acetone-*d*<sub>6</sub>) δ: -83.5 (s).

**HRMS (ESI)**, *m/z*: calc. for C<sub>13</sub>H<sub>10</sub>F<sub>3</sub>N<sub>2</sub>OS<sup>+</sup>: 299,0460 [M+H]<sup>+</sup>; found: 299,0460.



***N,N*-dimethyl-4-(5-methyl-5-(trifluoromethyl)-2,5-dihydro-1,2,4-oxadiazol-3-yl)aniline (39)**

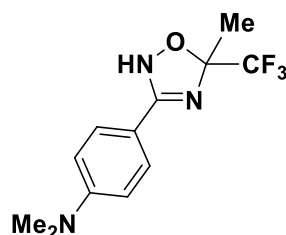

By following the general procedure 2 (GP2), starting from *N,N*-dimethyl-4-(5-phenyl-5-(trifluoromethyl)-2,5-dihydro-1,2,4-oxadiazol-3-yl)aniline (335.3 mg, 1.0 mmol, 1.0 equiv), and MeMgCl (0.37 mL of a solution 3.0 M in THF, 1.1 mmol, 1.1 equiv) in THF (5 mL), compound **39** was obtained in 93% yield (254.2 mg) as white solid (m.p.: 187 °C) after filtration on silica pad.

**<sup>1</sup>H-NMR** (600 MHz, Acetone-*d*<sub>6</sub>) δ: 7.56 - 7.53 (m, 2H), 7.08 (br), 6.77 - 6.73 (m, 2H), 3.01 (s, 3H), 1.69 (q, 3H, *J* = 1.2 Hz).

**<sup>13</sup>C-NMR** (150 MHz, Acetone-*d*<sub>6</sub>) δ: 156.2 (s), 153.2 (s), 128.5 (s), 124.7 (q, *J* = 288.3 Hz), 112.4 (s), 112.3 (s), 40.1 (s), 19.6 (s).

**<sup>19</sup>F-NMR** (565 MHz, Acetone-*d*<sub>6</sub>) δ: -86.6 (s).

**HRMS (ESI)**, *m/z*: calc. for C<sub>12</sub>H<sub>15</sub>F<sub>3</sub>N<sub>3</sub>O<sup>+</sup>: 274,1162 [M+H]<sup>+</sup>; found: 274,1163.

**3-(4-methoxyphenyl)-5-ethyl-5-(trifluoromethyl)-2,5-dihydro-1,2,4-oxadiazole (40)**

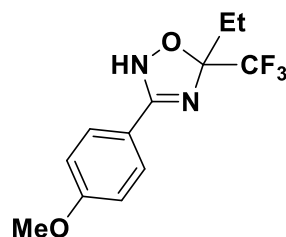

By following the general procedure 2 (GP2), starting from 3-(4-methoxyphenyl)-5-(trifluoromethyl)-1,2,4-oxadiazole (244.2 mg, 1.0 mmol, 1.0 equiv), and EtMgCl (0.55 mL of a solution 2.0 M in THF, 1.1 mmol, 1.1 equiv) in THF (5 mL), compound **40** was obtained in 94 (257.8 mg) as white solid (m.p.: 198 °C) after filtration on silica pad.

**<sup>1</sup>H-NMR** (600 MHz, Acetone-*d*<sub>6</sub>) δ: 7.71 - 7.67 (m, 2H), 7.24 (br, 1H), 7.04 - 7.00 (m, 2H), 3.85 (s, 3H), 2.00 (qd, 2H, *J* = 7.4, 0.7 Hz), 1.04 (td, 3H, *J* = 7.4, 0.5 Hz).

**<sup>13</sup>C-NMR** (150 MHz, Acetone-*d*<sub>6</sub>) δ: 162.4 (s), 155.5 (s), 128.6 (s), 124.3 (q, *J* = 288.6 Hz), 117.4 (s), 114.6 (s), 97.3 (q, *J* = 30.8 Hz), 55.4 (s), 24.3 (s), 5.4 (s).

**<sup>19</sup>F-NMR** (565 MHz, Acetone-*d*<sub>6</sub>) δ: -85.8 (s).

**HRMS (ESI)**, *m/z*: calc. for C<sub>12</sub>H<sub>14</sub>F<sub>3</sub>N<sub>2</sub>O<sub>2</sub><sup>+</sup>: 275,1002 [M+H]<sup>+</sup>; found: 275,1002.

**5-benzyl-3-(4-methoxyphenyl)-5-(trifluoromethyl)-2,5-dihydro-1,2,4-oxadiazole (41)**

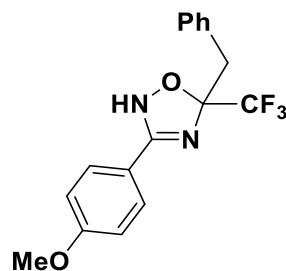

By following the general procedure 2 (GP2), starting from 3-(4-methoxyphenyl)-5-(trifluoromethyl)-1,2,4-oxadiazole (244.2 mg, 1.0 mmol, 1.0 equiv), and benzylmagnesium chloride (0.55 mL of a solution 2.0 M in



Et<sub>2</sub>O, 1.1 mmol, 1.1 equiv) in THF (5 mL), compound **41** was obtained in 95% yield (319.5 mg) as white solid (m.p.: 161 °C) after filtration on silica pad.

<sup>1</sup>H-NMR (600 MHz, Acetone-*d*<sub>6</sub>) δ: 7.51 - 7.47 (m, 2H), 7.43 - 7.40 (m, 2H), 7.28 (br, 1H), 7.27 - 7.22 (m, 2H), 7.21 (m, 1H), 6.94 - 6.90 (m, 2H), 3.79 (s, 3H), 3.37 (d, 1H, J = 14.7 Hz), 3.26 (d, 1H, J = 14.7 Hz).

<sup>13</sup>C-NMR (150 MHz, Acetone-*d*<sub>6</sub>) δ: 162.7 (s), 155.6 (s), 133.5 (s), 131.8 (s), 128.8 (s), 128.7 (s), 124.5 (q, J = 289.2 Hz), 117.4 (s), 114.8 (s), 97.4 (q, J = 30.7 Hz), 55.7 (s), 37.7 (s).

<sup>19</sup>F-NMR (565 MHz, Acetone-*d*<sub>6</sub>) δ: -84.9 (s).

HRMS (ESI), m/z: calc. for C<sub>17</sub>H<sub>16</sub>F<sub>3</sub>N<sub>2</sub>O<sub>2</sub><sup>+</sup>: 337,1158 [M+H]<sup>+</sup>; found: 337,1158.

## Synthetic manipulation of products

### 4-methyl-3-phenyl-5-(trifluoromethyl)-5-((trimethylsilyl)methyl)-4,5-dihydro-1,2,4-oxadiazole (**42**)

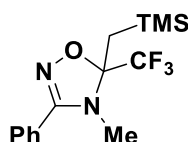

To a solution of 5-(iodomethyl)-4-methyl-3-phenyl-5-(trifluoromethyl)-4,5-dihydro-1,2,4-oxadiazole (**15**) (370.1 mg, 1 mmol, 1.0 equiv) in THF (5 mL) cooled at -78 °C, *sec*-BuLi (0.78 mL of a solution 1.4 M in cyclohexane, 1.1 mmol, 1.1 equiv) was added dropwise and the resulting mixture was stirred at low temperature for 10 minutes. TMSOTf (266.7 mg, 0.21 mL, 1.2 mmol, 1.2 equiv) was added dropwise and the solution was stirred overnight and allowed to slowly reach room temperature. After quenching with a saturated solution of NH<sub>4</sub>Cl<sub>(aq)</sub> (3 mL), the resulting mixture was extracted 3 times with Et<sub>2</sub>O, the organic phase was washed with brine, dried over anhydrous Na<sub>2</sub>SO<sub>4</sub> and concentrated in vacuo. Compound **42** was obtained in 75% yield (237.3 mg) as yellow solid (m.p.: 50 °C) after chromatography on silica gel (97:3 v/v, petroleum ether/ethyl acetate).

<sup>1</sup>H-NMR (600 MHz, CDCl<sub>3</sub>) δ: 7.73 – 7.70 (m, 2H), 7.56 – 7.51 (m, 1H), 7.48 – 7.44 (m, 2H), 3.12 (s, 3H), 1.58 (dd, 1H, J = 15.1, 0.9 Hz), 1.46 (d, 1H, J = 15.1 Hz), 0.11 (s, 9H).

<sup>13</sup>C-NMR (150 MHz, CDCl<sub>3</sub>) δ: 167.4 (s), 132.0 (s), 128.9 (s), 128.7 (s), 126.7 (s), 122.8 (q, J = 288.2 Hz), 106.6 (q, J = 30.1 Hz), 42.2 (s), 22.2 (s), -0.3 (s).

<sup>19</sup>F-NMR (565 MHz, CDCl<sub>3</sub>) δ: -84.4 (s).

HRMS (ESI), m/z: calc. for C<sub>14</sub>H<sub>20</sub>F<sub>3</sub>N<sub>2</sub>OSi<sup>+</sup>: 317,1292 [M+H]<sup>+</sup>; found: 317,1292.

### 1-(5-butyl-3-phenyl-5-(trifluoromethyl)-1,2,4-oxadiazol-2(5H)-yl)ethan-1-one (**43**)

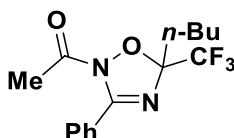

To a solution of 5-butyl-3-phenyl-5-(trifluoromethyl)-2,5-dihydro-1,2,4-oxadiazole (**34**) (272.3 mg, 1 mmol, 1.0 equiv) and triethylamine (111.3 mg, 0.10 mL, 1.1 mmol, 1.1 equiv) and DMAP (12.2 mg, 0.1 mmol, 0.01 equiv) in DCM (5 mL) cooled at 0 °C, acetic anhydride (112.3 mg, 0.15 mL, 1.1 mmol, 1.1 equiv) was added dropwise and the resulting mixture was stirred overnight and allowed to slowly reach room temperature. After quenching with a saturated solution of NaHCO<sub>3</sub><sub>(aq)</sub> (3 mL), the resulting mixture was extracted 3 times with Et<sub>2</sub>O, the organic phase was washed with brine, dried over anhydrous Na<sub>2</sub>SO<sub>4</sub> and concentrated in vacuo. Compound **43** was obtained in 79% yield (248.3 mg) as yellow oil after chromatography on silica gel (95:5 v/v, petroleum ether/ethyl acetate).



**<sup>1</sup>H-NMR** (400 MHz, CDCl<sub>3</sub>) δ: 7.83 – 7.76 (m, 2H), 7.59 – 7.50 (m, 1H), 7.44 (t, 2H, J = 7.7 Hz), 2.30 (s, 3H), 2.16 (m, 1H), 2.05 (m, 1H), 1.40 (m, 4H), 0.93 (m, 3H).

**<sup>13</sup>C-NMR** (100 MHz, CDCl<sub>3</sub>) δ: 169.6 (s), 158.5 (s), 132.5 (s), 130.1 (s), 128.0 (s), 127.0 (s), 122.6 (q, J = 286.3 Hz), 105.8 (q, J = 27.2 Hz), 31.1 (s), 23.5 (s), 22.8 (s), 22.4 (s), 13.8 (s).

**<sup>19</sup>F-NMR** (377 MHz, CDCl<sub>3</sub>) δ: -82.7 (s).

**HRMS (ESI)**, m/z: calc. for C<sub>15</sub>H<sub>18</sub>F<sub>3</sub>N<sub>2</sub>O<sub>2</sub><sup>+</sup>: 315,1315 [M+H]<sup>+</sup>; found: 315,1316.

#### 5-(chloromethyl)-3-phenyl-5-(trifluoromethyl)-2,5-dihydro-1,2,4-oxadiazole (44)

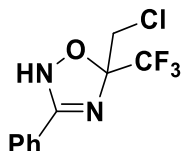

By following the general procedure 3 (GP3), starting from 3-(phenyl)-5-(trifluoromethyl)-1,2,4-oxadiazole (214.2 mg, 1.0 mmol, 1.0 equiv), chloriodomethane (529.1 mg, 0.22 mL, 3.0 mmol, 3.0 equiv) and PhLi (1.47 mL of a solution 1.9 M in Bu<sub>2</sub>O, 2.8 mmol, 2.8 equiv) in THF (5 mL), compound **44** was obtained in 85% yield (224.9 mg) as white solid (m.p.: 125 °C) after chromatography on silica gel (90:10 v/v, petroleum ether/ethyl acetate).

**<sup>1</sup>H-NMR** (600 MHz, Acetone-*d*<sub>6</sub>) δ: 7.84 (br, 1H), 7.79 – 7.76 (m, 2H), 7.55 (m, 1H), 7.52 – 7.48 (m, 2H), 4.12 (s, 2H).

**<sup>13</sup>C-NMR** (150 MHz, Acetone-*d*<sub>6</sub>) δ: 156.3 (s), 132.2 (s), 129.7 (s), 127.4 (s), 125.0 (s), 123.6 (q, J = 288.8 Hz), 96.9 (q, J = 31.4 Hz), 43.7 (s).

**<sup>19</sup>F-NMR** (565 MHz, Acetone-*d*<sub>6</sub>) δ: -83.4 (s).

**HRMS (ESI)**, m/z: calc. for C<sub>10</sub>H<sub>9</sub>ClF<sub>3</sub>N<sub>2</sub>O<sup>+</sup>: 265,0350 [M+H]<sup>+</sup>; found: 265,0350.

#### 5-(chloromethyl)-3-(thiophen-2-yl)-5-(trifluoromethyl)-2,5-dihydro-1,2,4-oxadiazole (45)

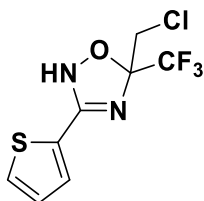

By following the general procedure 3 (GP3), starting from 3-(thiophen-2-yl)-5-(trifluoromethyl)-1,2,4-oxadiazole (220.2 mg, 1.0 mmol, 1.0 equiv), chloriodomethane (529.1 mg, 0.22 mL, 3.0 mmol, 3.0 equiv) and PhLi (1.47 mL of a solution 1.9 M in Bu<sub>2</sub>O, 2.8 mmol, 2.8 equiv) in THF (5 mL), compound **45** was obtained in 88% yield (238.1 mg) as white solid (m.p.: 132°C) after chromatography on silica gel (85:15 v/v, petroleum ether/ethyl acetate).

**<sup>1</sup>H-NMR** (600 MHz, Acetone-*d*<sub>6</sub>) δ: 8.07 (br, 1H), 7.71 (dd, 1H, J = 5.1, 1.1 Hz), 7.59 (dd, 1H, J = 3.7, 1.1 Hz), 7.18 (dd, 1H, J = 5.1, 3.7 Hz), 4.11 (s, 2H).

**<sup>13</sup>C-NMR** (150 MHz, Acetone-*d*<sub>6</sub>) δ: 152.5 (s), 130.5 (s), 130.3 (s), 128.5 (s), 125.6 (s), 123.5 (q, J = 288.9 Hz), 96.9 (q, J = 31.6 Hz), 43.5 (s).

**<sup>19</sup>F-NMR** (565 MHz, Acetone-*d*<sub>6</sub>) δ: -83.3 (s).

**HRMS (ESI)**, m/z: calc. for C<sub>8</sub>H<sub>7</sub>ClF<sub>3</sub>N<sub>2</sub>OS<sup>+</sup>: 270,9914 [M+H]<sup>+</sup>; found: 270,9914.



**2-benzyl-5-(chloromethyl)-3-(4-chlorophenyl)-5-(trifluoromethyl)-2,5-dihydro-1,2,4-oxadiazole (46)**

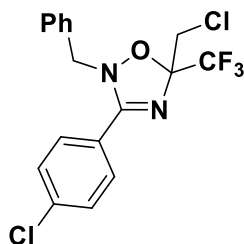

By following the general procedure 3 (GP3), starting from 3-(4-chlorophenyl)-5-(trifluoromethyl)-1,2,4-oxadiazole (248.6 mg, 1.0 mmol, 1.0 equiv), chloriodomethane (529.1 mg, 0.22 mL, 3.0 mmol, 3.0 equiv), PhLi (1.47 mL of a solution 1.9 M in Bu<sub>2</sub>O, 2.8 mmol, 2.8 equiv) and benzyl bromide (188.1 mg, 0.13 mL, 1.1 mmol, 1.1 equiv), in THF (5 mL), compound **46** was obtained in 82% yield (319.1 mg) as white solid (m.p.: 110 °C) after chromatography on silica gel (97:3 v/v, petroleum ether/ethyl acetate).

<sup>1</sup>H NMR (600 MHz, CDCl<sub>3</sub>) δ: 7.77 (m, 2H), 7.49 (m, 2H), 7.43 – 7.34 (m, 5H), 4.59 (s, 2H), 3.93 (d, 1H, J = 12.2 Hz), 3.80 (d, 1H, J = 12.3 Hz).

<sup>13</sup>C NMR (150 MHz, CDCl<sub>3</sub>) δ: 167.4 (s), 138.9 (s), 134.9 (s), 130.2 (s), 129.4 (s), 128.6 (s), 128.1 (s), 127.9 (s), 124.6 (s), 121.9 (q, J = 287.8 Hz), 105.8 (q, J = 30.2 Hz), 59.1 (s), 43.4 (s).

<sup>19</sup>F NMR (565 MHz, CDCl<sub>3</sub>) δ: -80.3 (s).

HRMS (ESI), m/z: calc. for C<sub>17</sub>H<sub>14</sub>Cl<sub>2</sub>F<sub>3</sub>N<sub>2</sub>O<sup>+</sup>: 389,0430 [M+H]<sup>+</sup>; found: 389,0430.

**2-allyl-5-(chloromethyl)-3-phenyl-5-(trifluoromethyl)-2,5-dihydro-1,2,4-oxadiazole (47)**

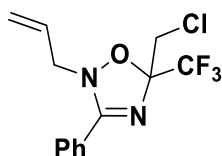

By following the general procedure 3 (GP3), starting from 3-(4-chlorophenyl)-5-(trifluoromethyl)-1,2,4-oxadiazole (248.6 mg, 1.0 mmol, 1.0 equiv), chloriodomethane (529.1 mg, 0.22 mL, 3.0 mmol, 3.0 equiv), PhLi (1.47 mL of a solution 1.9 M in Bu<sub>2</sub>O, 2.8 mmol, 2.8 equiv) and allyl iodide (184.8 mg, 0.10 mL, 1.1 mmol, 1.1 equiv), in THF (5 mL), compound **47** was obtained in 86% yield (262.0 mg) as orange oil after chromatography on silica gel (97:3 v/v, petroleum ether/ethyl acetate).

<sup>1</sup>H-NMR (600 MHz, CDCl<sub>3</sub>) δ: 7.75 – 7.73 (m, 2H), 7.58 – 7.55 (m, 1H), 7.50 – 7.45 (m, 2H), 5.96 (ddt, 1H, J = 17.1, 10.3, 5.8 Hz), 5.30 (dq, 1H, J = 17.1, 1.5 Hz), 5.26 (dq, 1H, J = 10.3, 1.3 Hz), 4.05 – 4.00 (m, 3H), 3.86 (d, 1H, J = 12.2 Hz).

<sup>13</sup>C-NMR (150 MHz, CDCl<sub>3</sub>) δ: 168.5 (s), 132.5 (s), 131.6 (s), 129.0 (s), 128.8 (s), 126.2 (s), 122.1 (q, J = 288.1 Hz), 118.9 (s), 105.6 (q, J = 30.1 Hz), 58.0 (s), 43.7 (s).

<sup>19</sup>F-NMR (565 MHz, CDCl<sub>3</sub>) δ: -80.5 (s).

HRMS (ESI), m/z: calc. for C<sub>13</sub>H<sub>13</sub>ClF<sub>3</sub>N<sub>2</sub>O<sup>+</sup>: 305,0663 [M+H]<sup>+</sup>; found: 305,0663.

**3-(4-methoxyphenyl)-2,5-dimethyl-5-(trifluoromethyl)-2,5-dihydro-1,2,4-oxadiazole (48)**

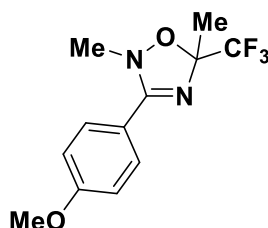



To a solution of 5-(trifluoromethyl)-3-(4-(methoxy)phenyl)-1,2,4-oxadiazole (282.2 mg, 1.0 mmol, 1.0 equiv) in THF (5 mL) cooled at -78 °C, MeLi (0.68 mL of a solution 1.6 M in Et<sub>2</sub>O, 1.1 mmol, 1.1 equiv) was added dropwise and the mixture was stirred at low temperature for 1 hour. Then MeI (156.1 mg, 0.07 mL, 1.1 mmol, 1.1 equiv) was added dropwise and the mixture was stirred overnight and allowed to gradually reach room temperature; subsequently, a saturated solution of NH<sub>4</sub>Cl<sub>(aq.)</sub> was added. The organic phase was extracted with EtOAc (3 x 10 mL) and was washed with brine then, was dried over anhydrous Na<sub>2</sub>SO<sub>4</sub> and the solvent was removed under reduced pressure. Compound **48** was obtained in 84% yield (230.3 mg) as white solid (m.p.: 36 °C) after chromatography on silica gel (90:10 v/v, petroleum ether/ethyl acetate).

**<sup>1</sup>H-NMR** (600 MHz, CDCl<sub>3</sub>) δ: 7.71 – 7.67 (m, 2H), 6.97 – 6.94 (m, 2H), 3.86 (s, 3H), 3.11 (s, 3H), 1.73 (br q, 3H).

**<sup>13</sup>C-NMR** (150 MHz, CDCl<sub>3</sub>) δ: 167.6 (s), 162.7 (s), 130.6 (s), 122.7 (q, J = 286.8 Hz), 118.5 (s), 114.2 (s), 104.4 (q, J = 30.6 Hz), 55.5 (s), 43.4 (s), 21.4 (s).

**<sup>19</sup>F-NMR** (565 MHz, CDCl<sub>3</sub>) δ: -83.6 (s).

**HRMS (ESI)**, m/z: calc. for C<sub>12</sub>H<sub>14</sub>F<sub>3</sub>N<sub>2</sub>O<sub>2</sub><sup>+</sup>: 275,1002 [M+H]<sup>+</sup>; found: 275,1002.

#### 2,5-dimethyl-5-(trifluoromethyl)-3-(4-(trifluoromethyl)phenyl)-2,5-dihydro-1,2,4-oxadiazole (**49**)

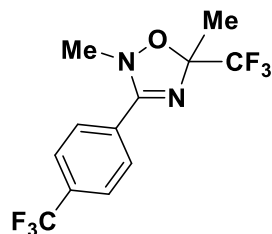

To a solution of 5-(trifluoromethyl)-3-(4-(trifluoromethyl)phenyl)-1,2,4-oxadiazole (282.2 mg, 1.0 mmol, 1.0 equiv) in THF (5 mL) cooled at -78 °C, MeLi (0.68 mL of a solution 1.6 M in Et<sub>2</sub>O, 1.1 mmol, 1.1 equiv) was added dropwise and the mixture was stirred at low temperature for 1 hour. Then MeI (156.1 mg, 0.07 mL, 1.1 mmol, 1.1 equiv) was added dropwise and the mixture was stirred overnight and allowed to gradually reach room temperature; subsequently, a saturated solution of NH<sub>4</sub>Cl<sub>(aq.)</sub> was added. The organic phase was extracted with EtOAc (3 x 10 mL) and was washed with brine then, was dried over anhydrous Na<sub>2</sub>SO<sub>4</sub> and the solvent was removed under reduced pressure. Compound **49** was obtained in 93% yield (290.3 mg) as white solid (m.p.: 42 °C) after chromatography on silica gel (97:3 v/v, petroleum ether/ethyl acetate).

**<sup>1</sup>H-NMR** (600 MHz, CDCl<sub>3</sub>) δ: 7.88 – 7.85 (m, 2H), 7.75 – 7.71 (m, 2H), 3.12 (s, 3H), 1.76 (br q, 3H, J = 1.1 Hz).

**<sup>13</sup>C-NMR** (150 MHz, CDCl<sub>3</sub>) δ: 166.8 (s), 133.9 (q, J = 32.9 Hz), 129.9 (s), 129.3 (s), 125.9 (q, J = 3.6 Hz), 123.9 (q, J = 135.8 Hz), 122.1 (q, J = 149.9 Hz), 104.6 (q, J = 30.9 Hz), 42.8 (s), 21.2 (s).

**<sup>19</sup>F-NMR** (565 MHz, CDCl<sub>3</sub>) δ: -63.1 (s), -83.7 (s).

**HRMS (ESI)**, m/z: calc. for C<sub>12</sub>H<sub>11</sub>F<sub>6</sub>N<sub>2</sub>O<sup>+</sup>: 313,0770 [M+H]<sup>+</sup>; found: 313,0770.



## Copies of $^1\text{H}$ , $^{13}\text{C}$ and $^{19}\text{F}$ -NMR Spectra of all compounds

Isopropyl 3-(5-(trifluoromethyl)-1,2,4-oxadiazol-3-yl)benzoate (5-*sm*)



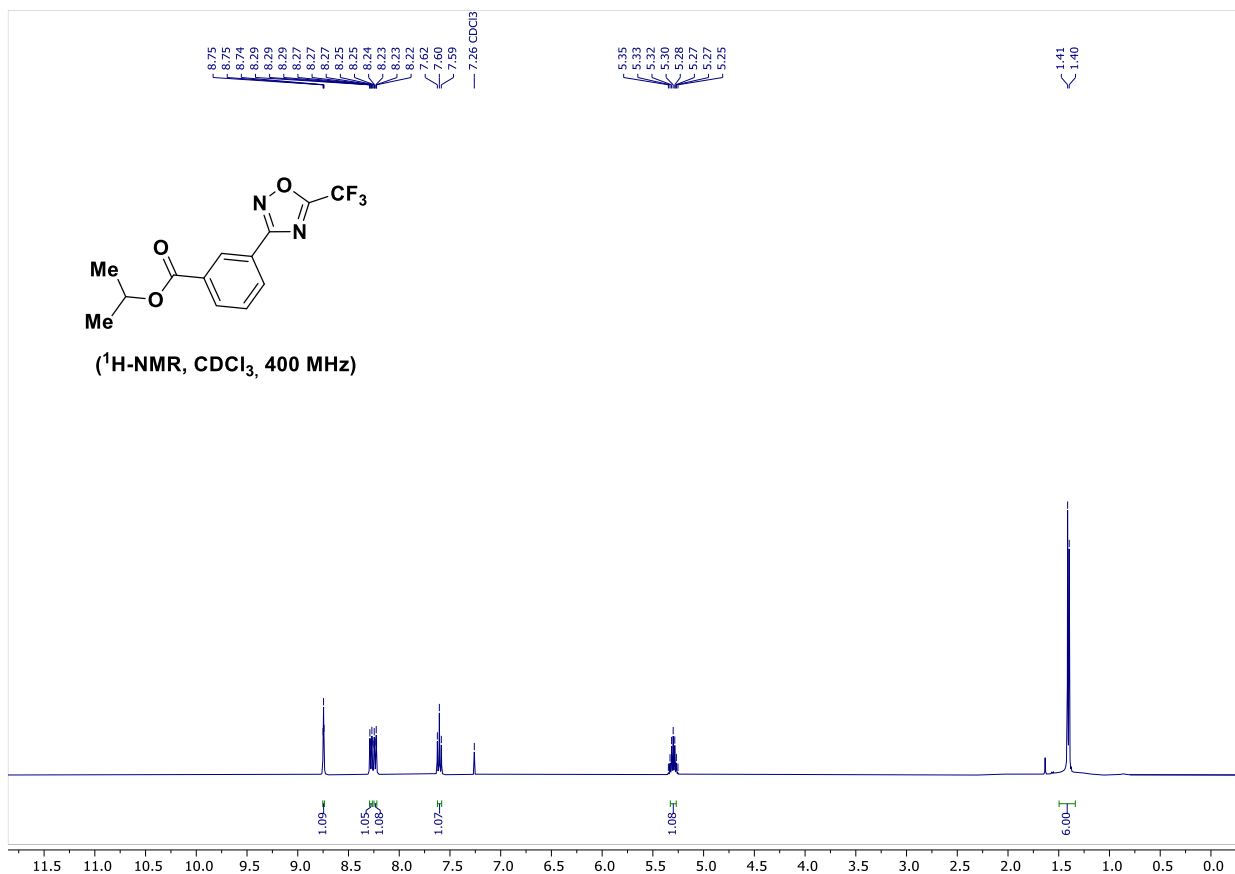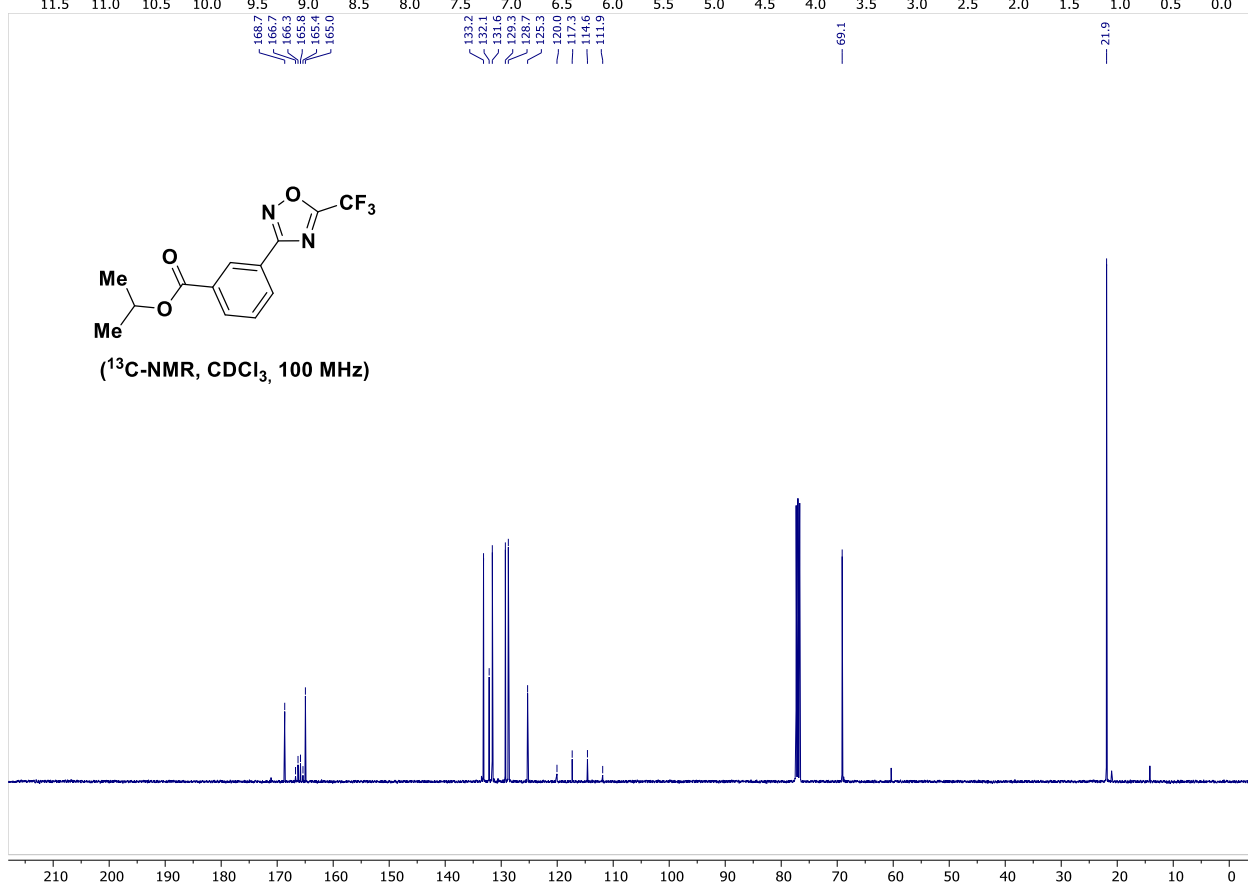



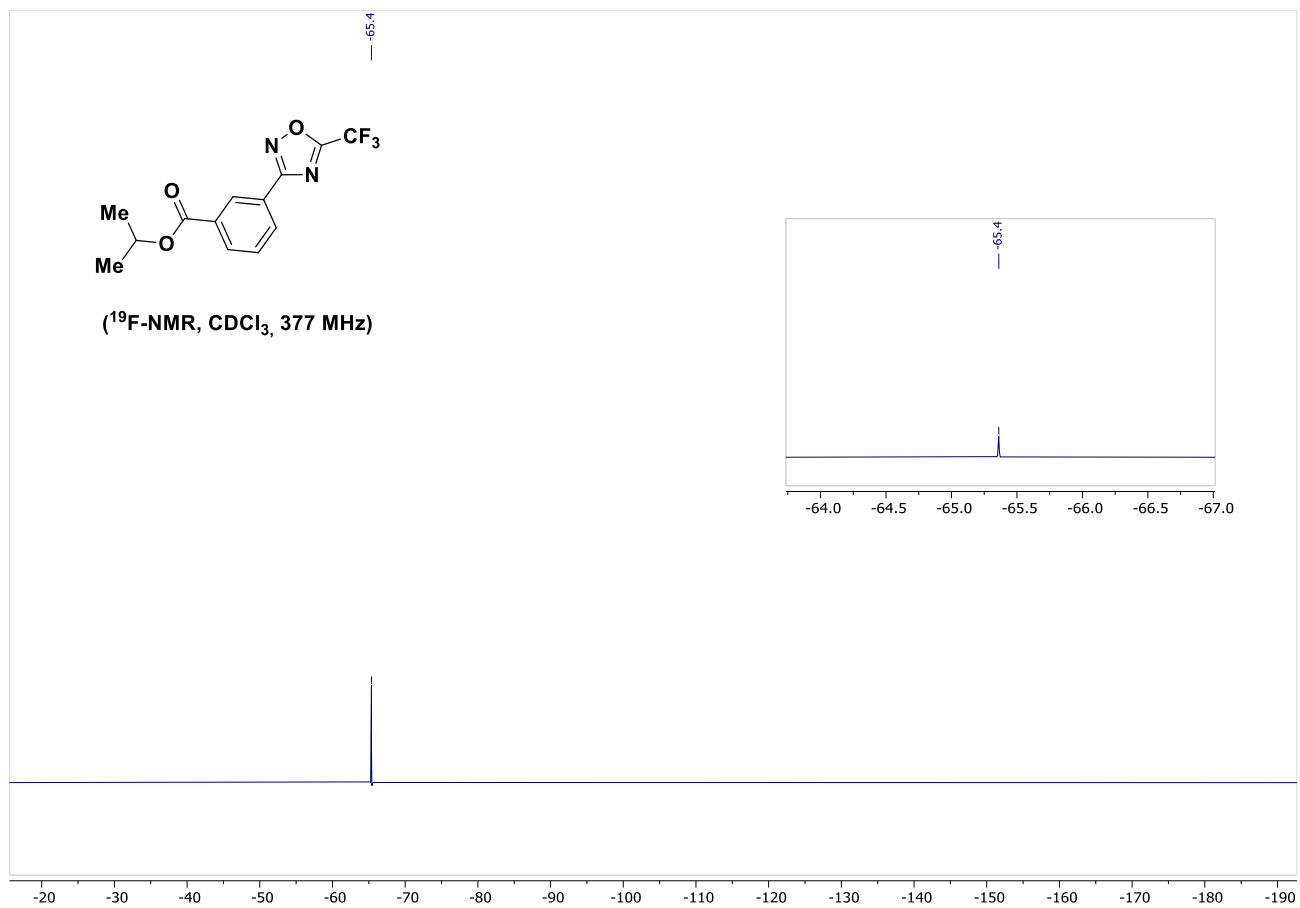

### 3-(pyridin-4-yl)-5-(trifluoromethyl)-1,2,4-oxadiazole (7-sm)

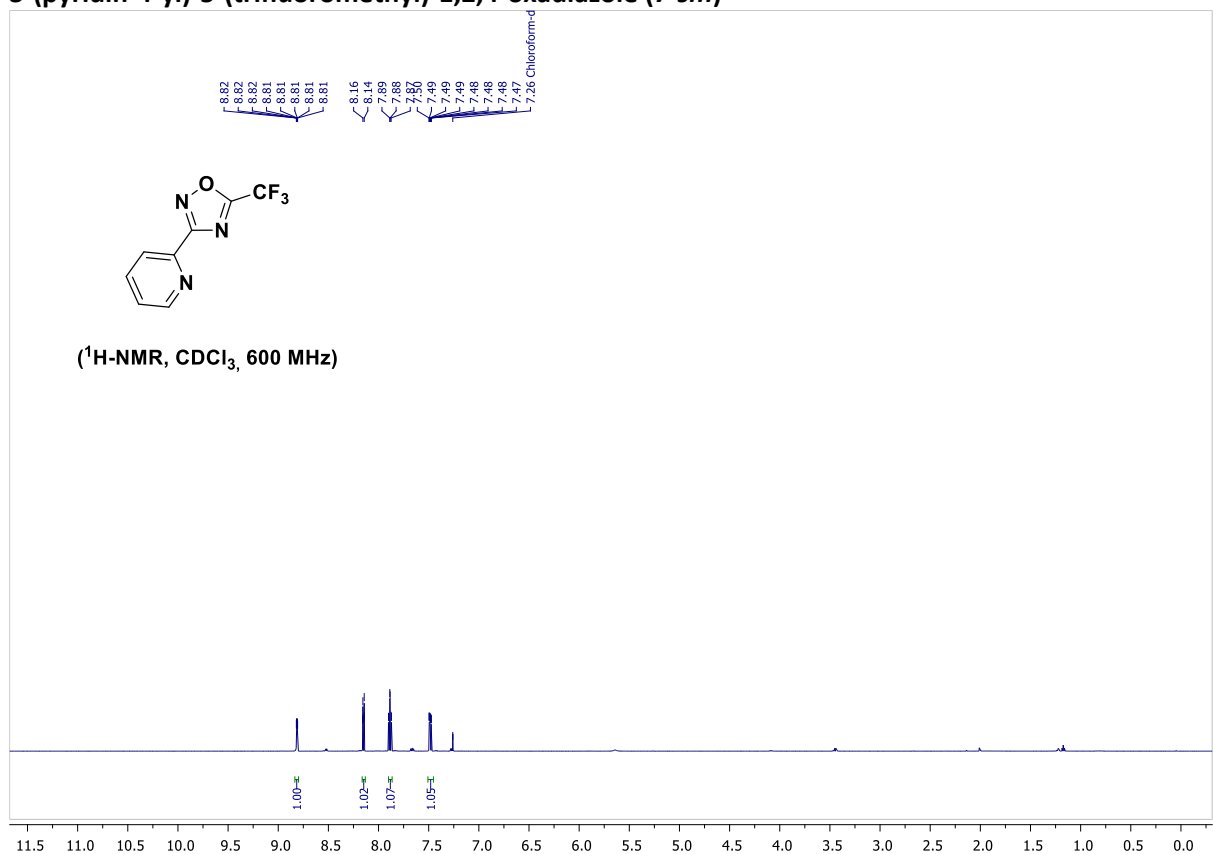



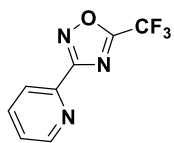

(<sup>13</sup>C-NMR, CDCl<sub>3</sub>, 150 MHz)

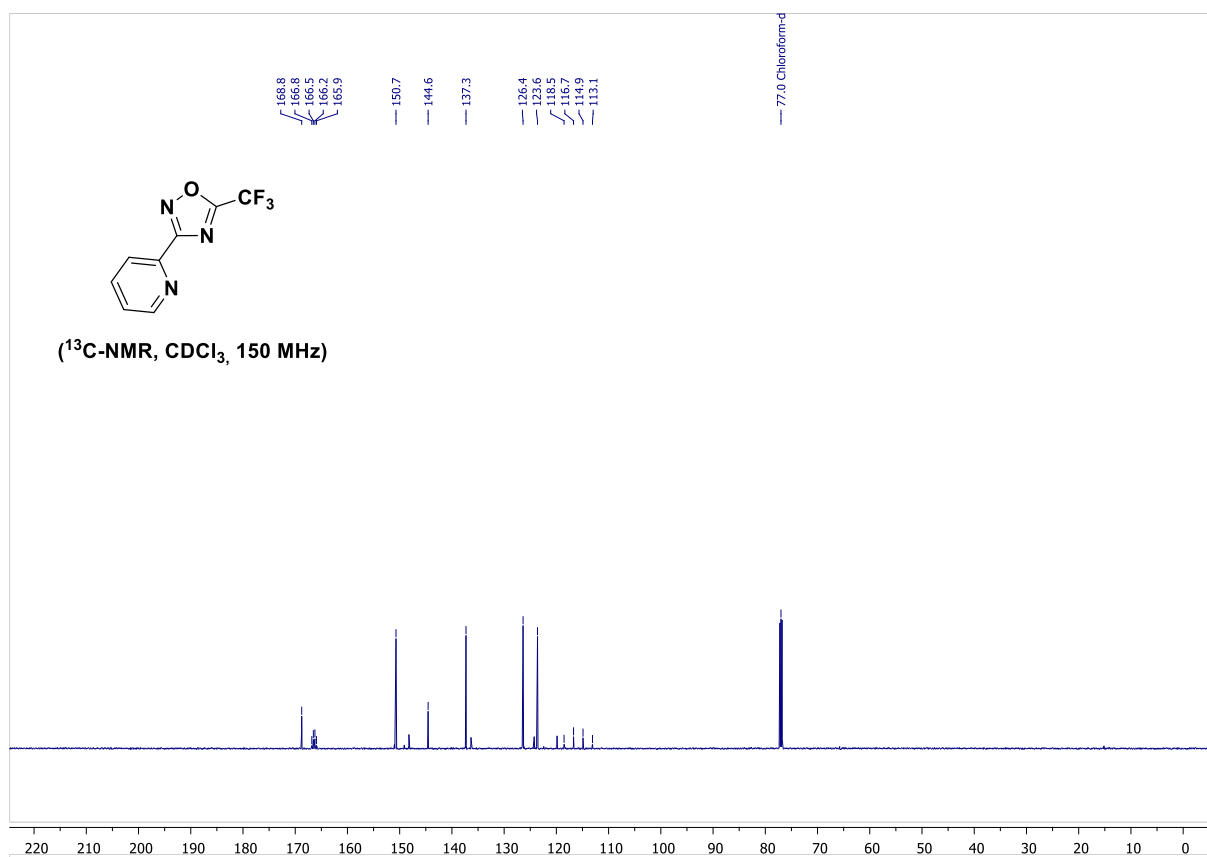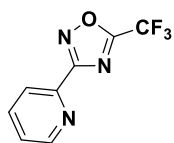

(<sup>19</sup>F-NMR, CDCl<sub>3</sub>, 565 MHz)

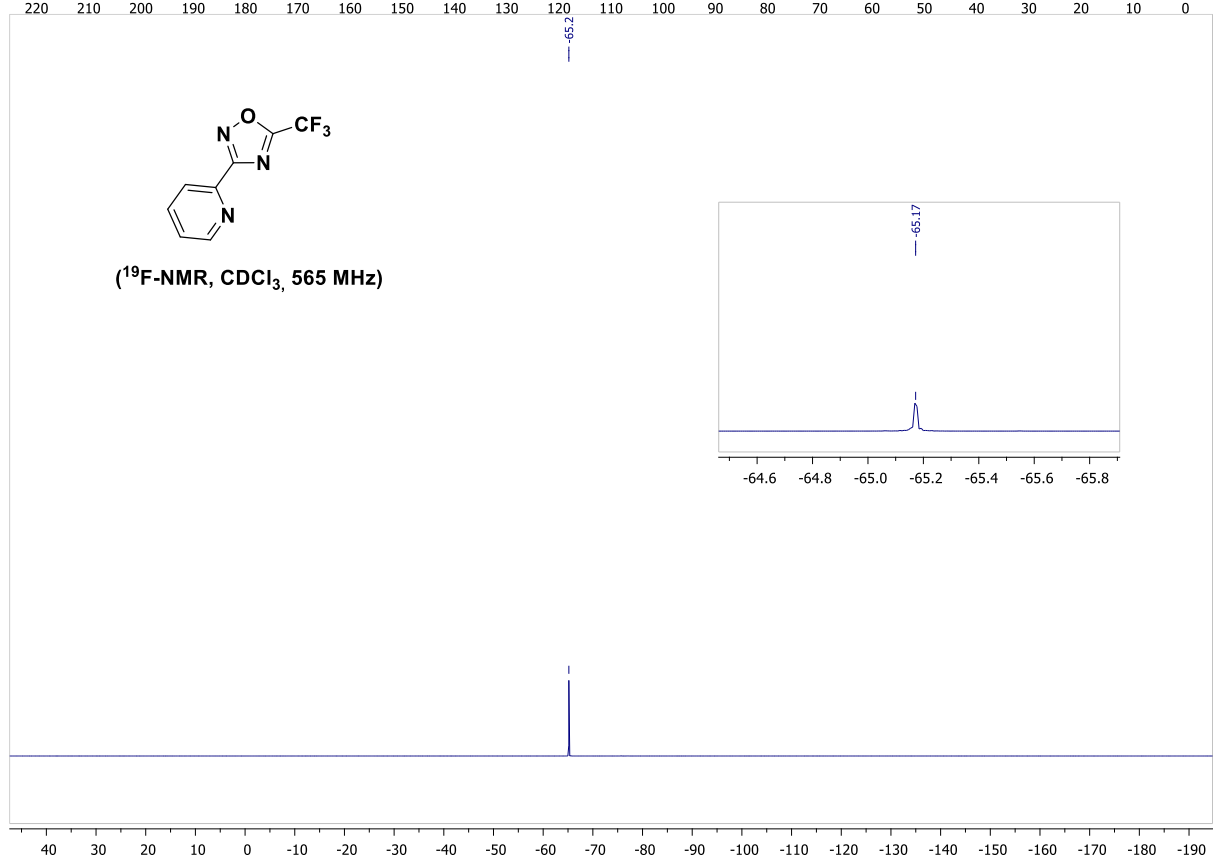



**3-(thiophen-2-yl)-5-(trifluoromethyl)-1,2,4-oxadiazole (13-sm)**

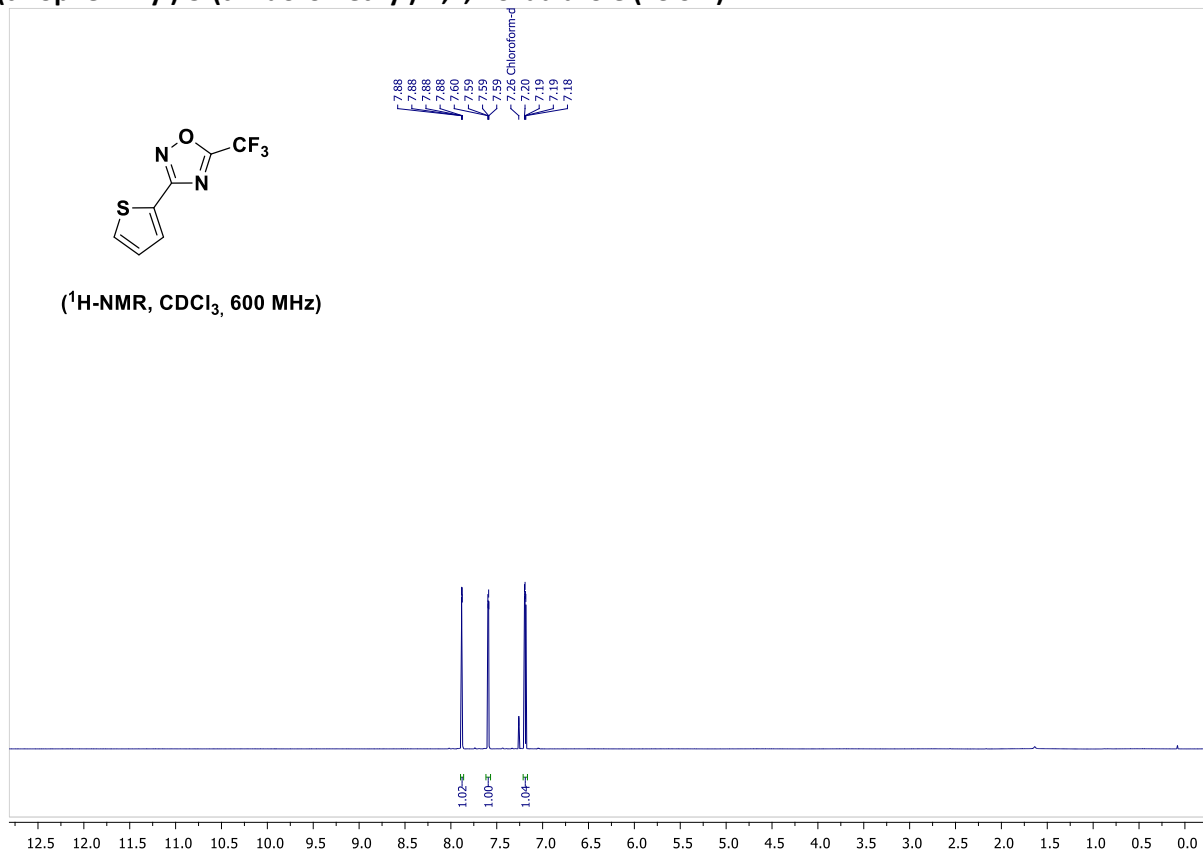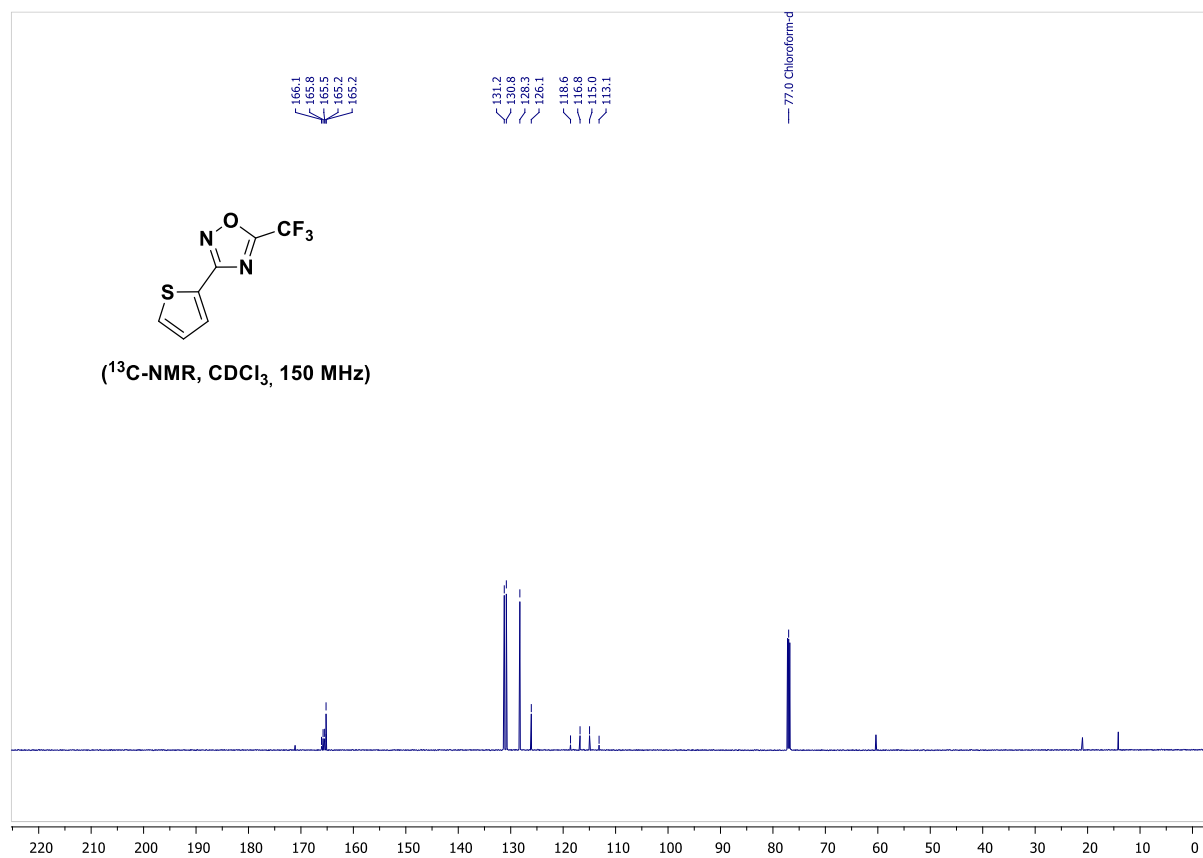



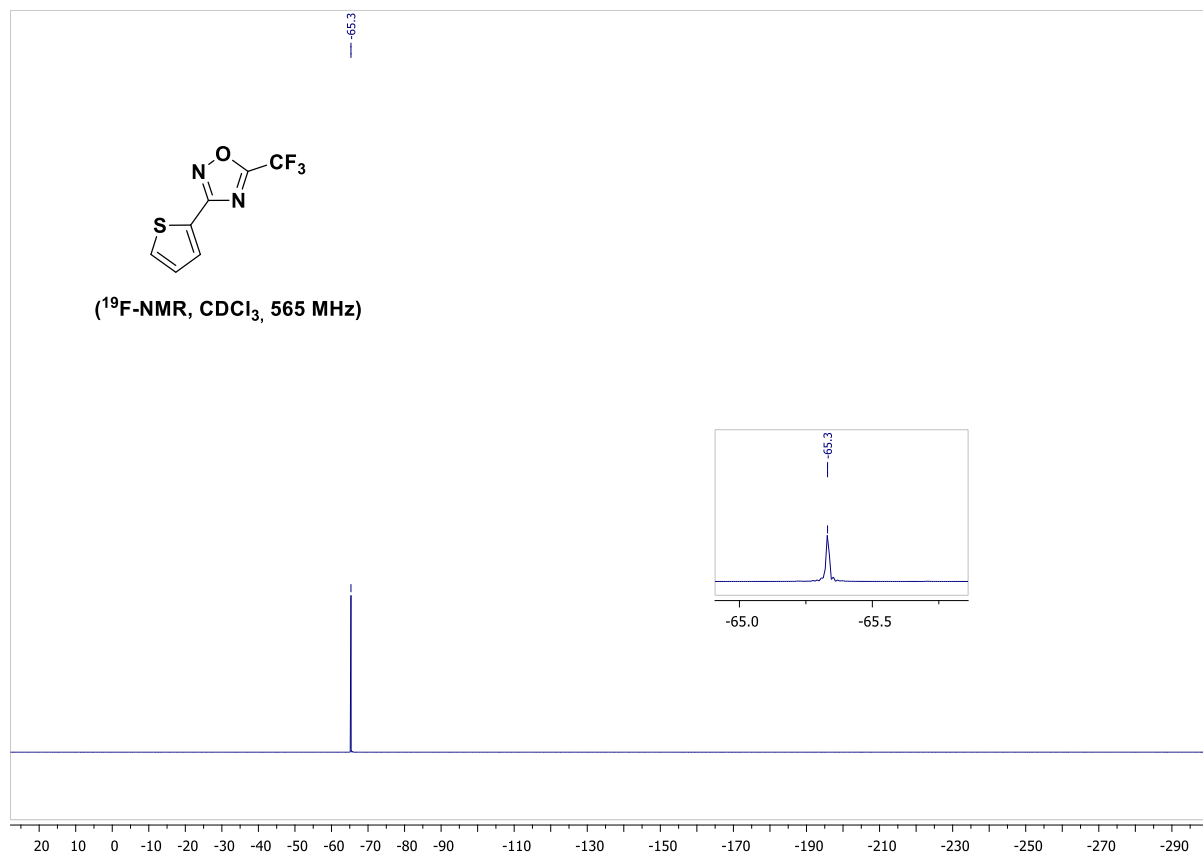

***N,N*-dimethyl-4-(5-(trifluoromethyl)-1,2,4-oxadiazol-3-yl)aniline (16-sm)**

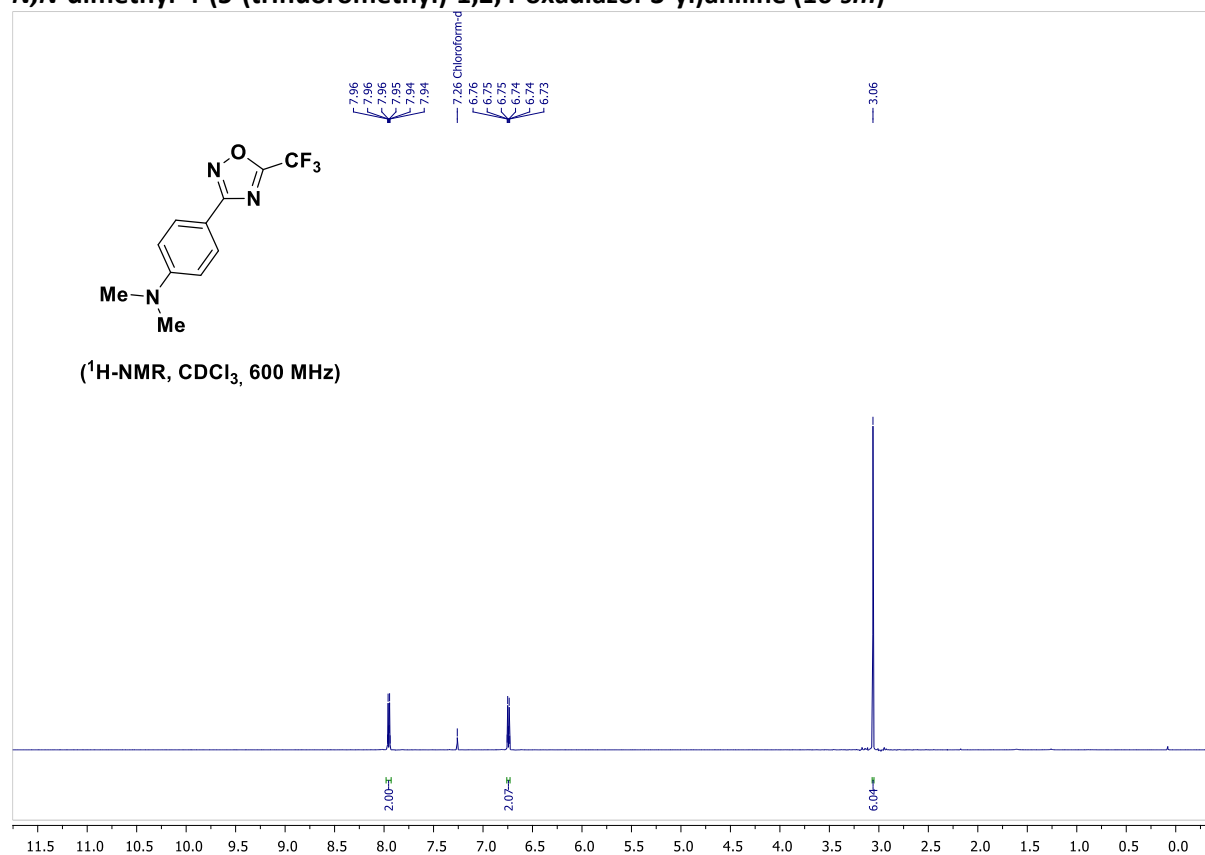



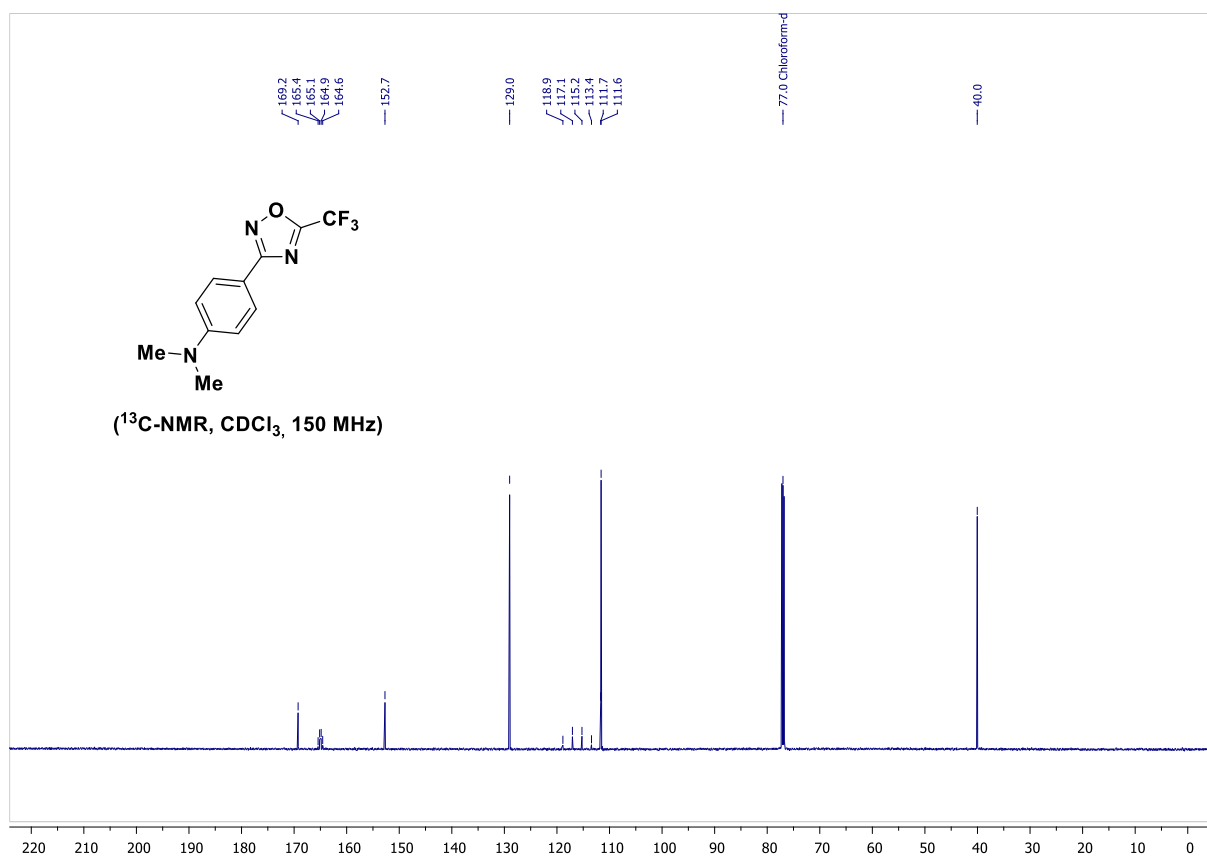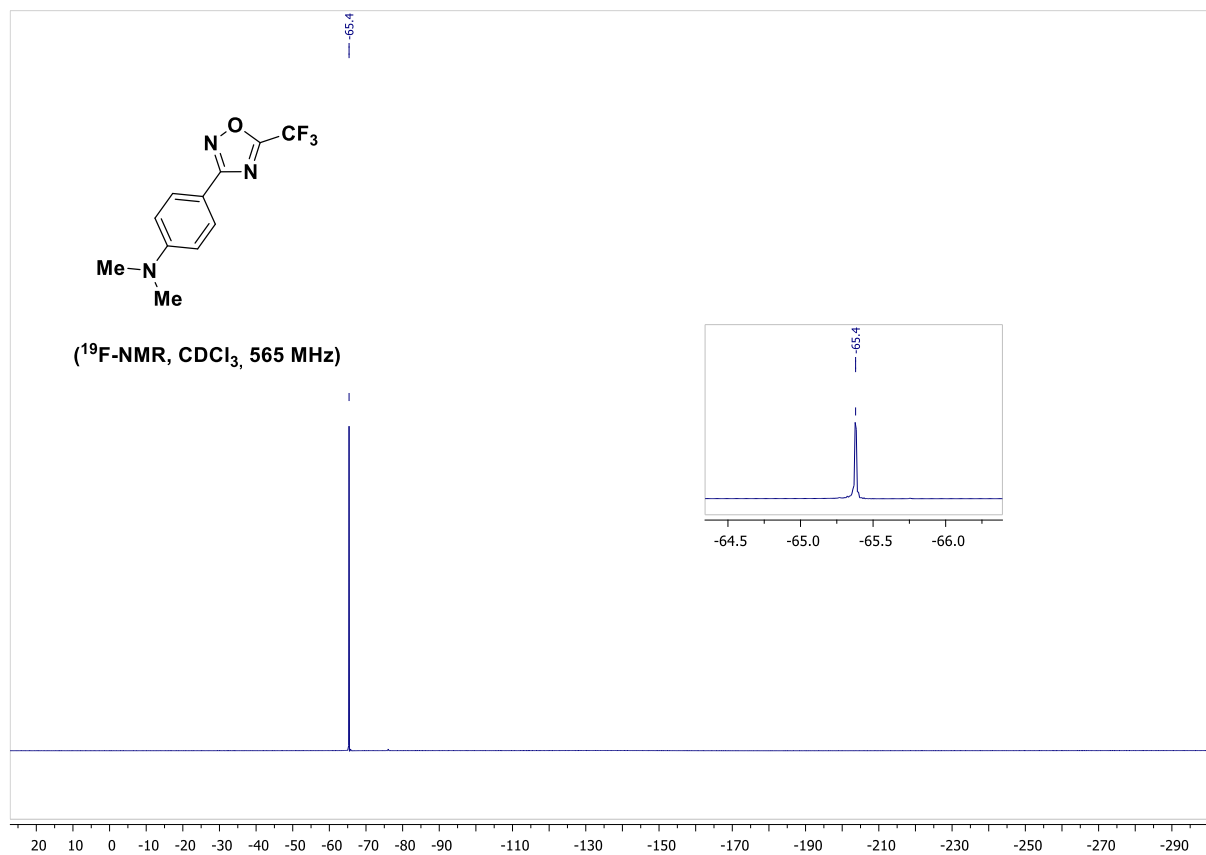



**3-(pyridin-4-yl)-5-(trifluoromethyl)-1,2,4-oxadiazole (24-sm)**

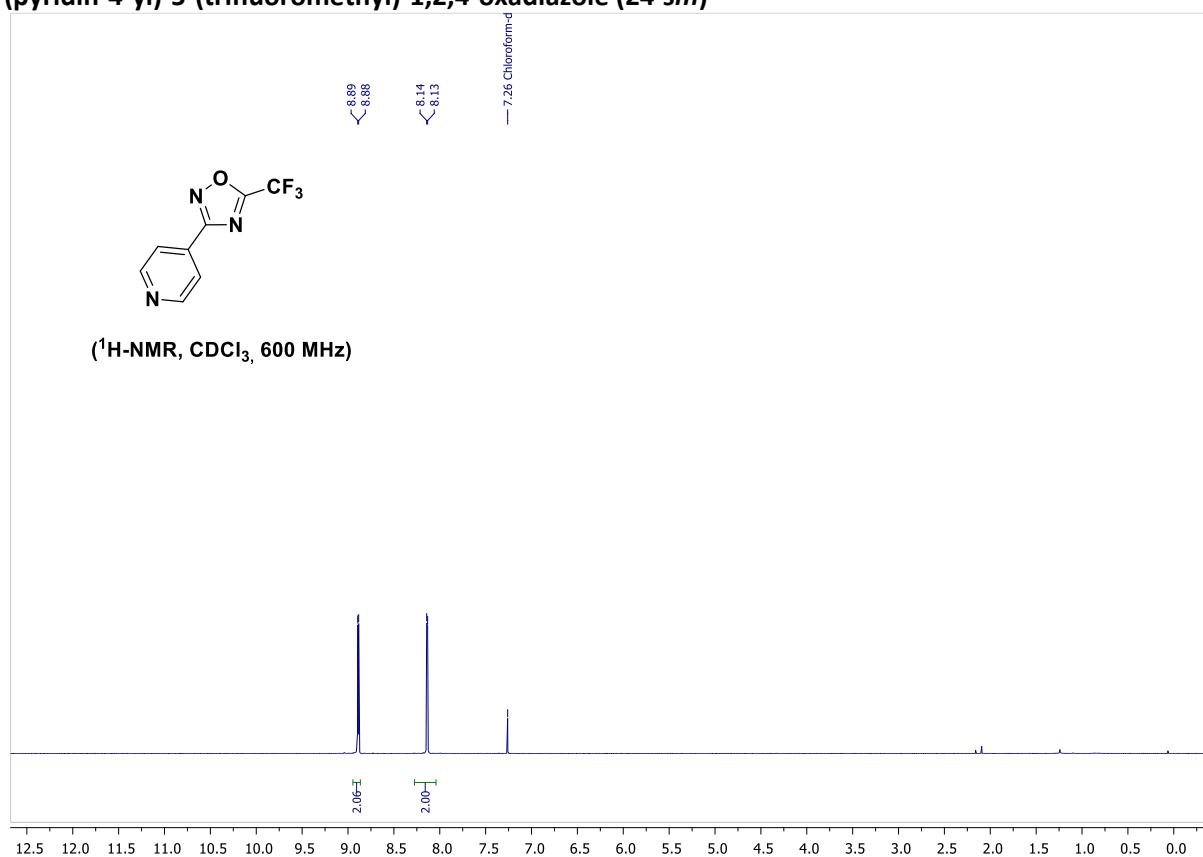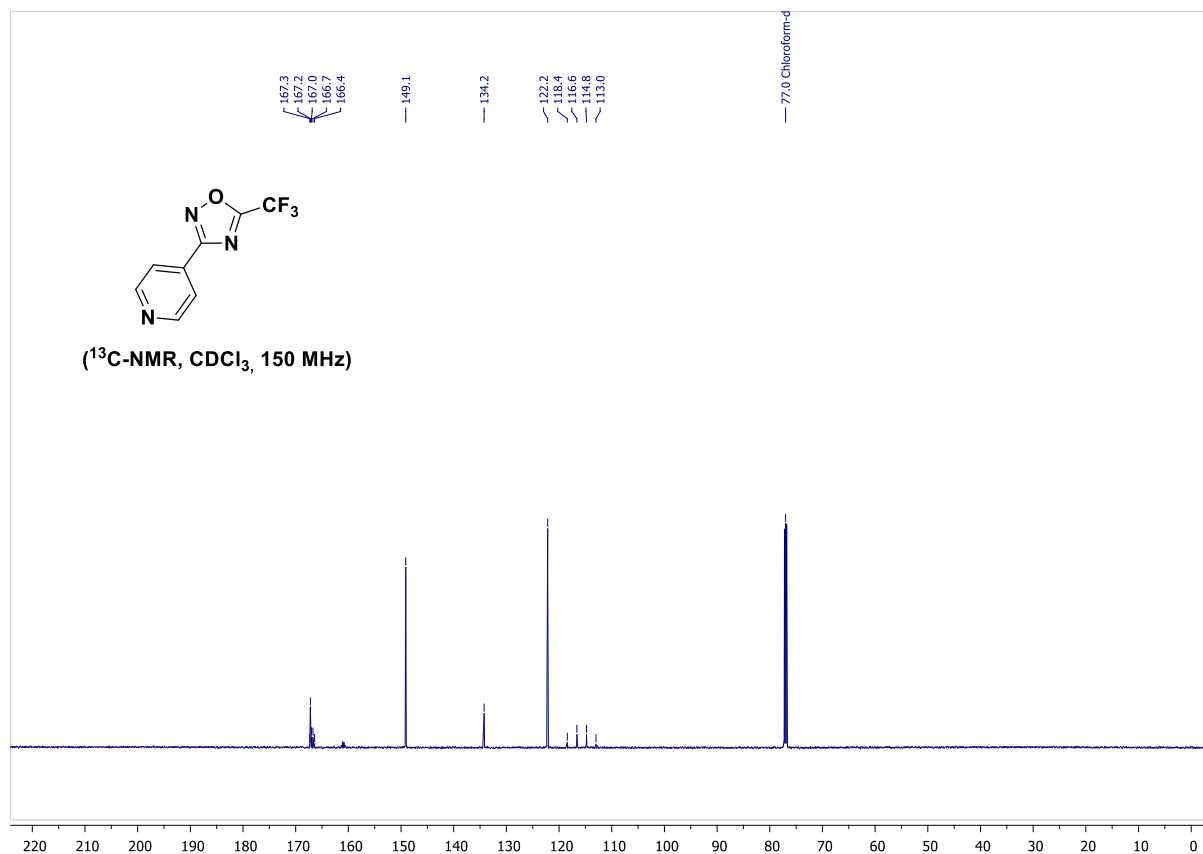



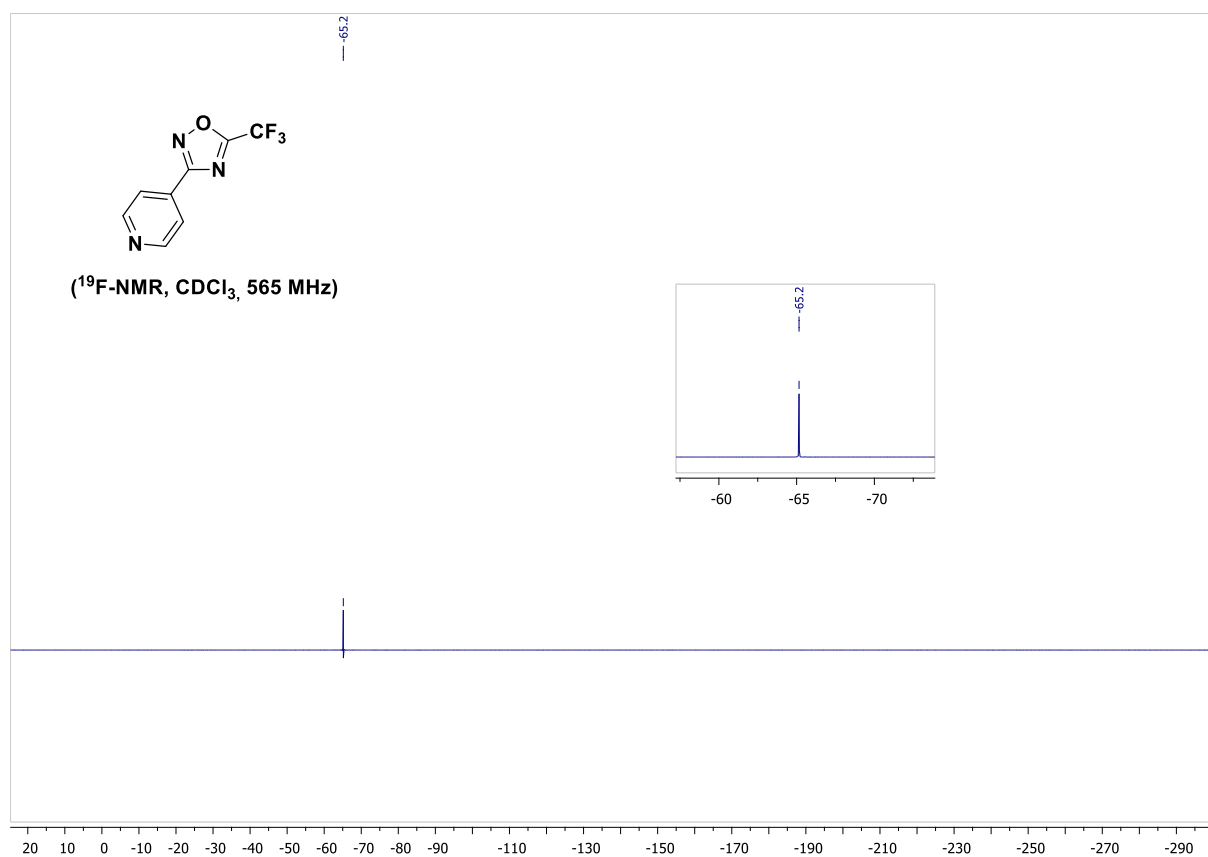

**3-(4-bromophenyl)-5-(chloromethyl)-2-methyl-5-(trifluoromethyl)-2,5-dihydro-1,2,4-oxadiazole (2)**

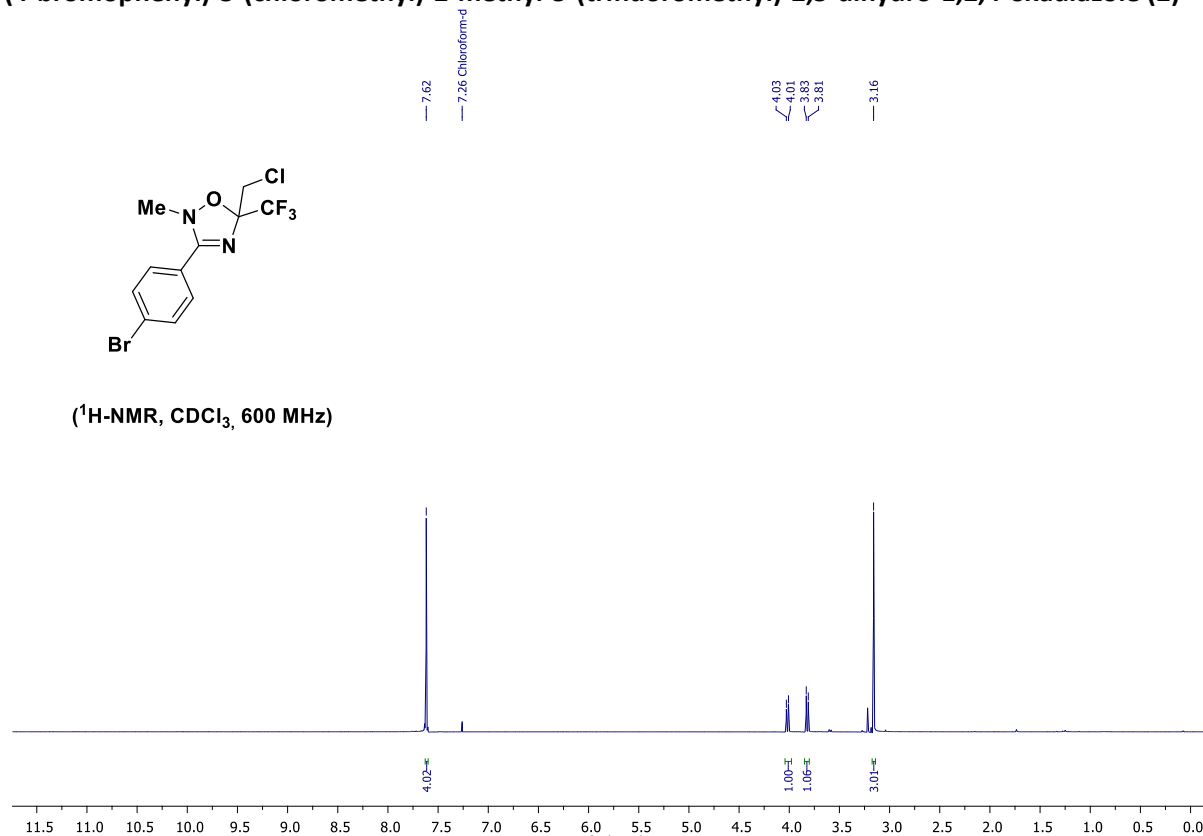



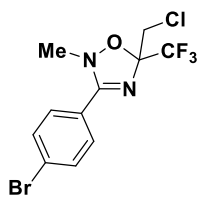

(<sup>13</sup>C-NMR, CDCl<sub>3</sub>, 150 MHz)

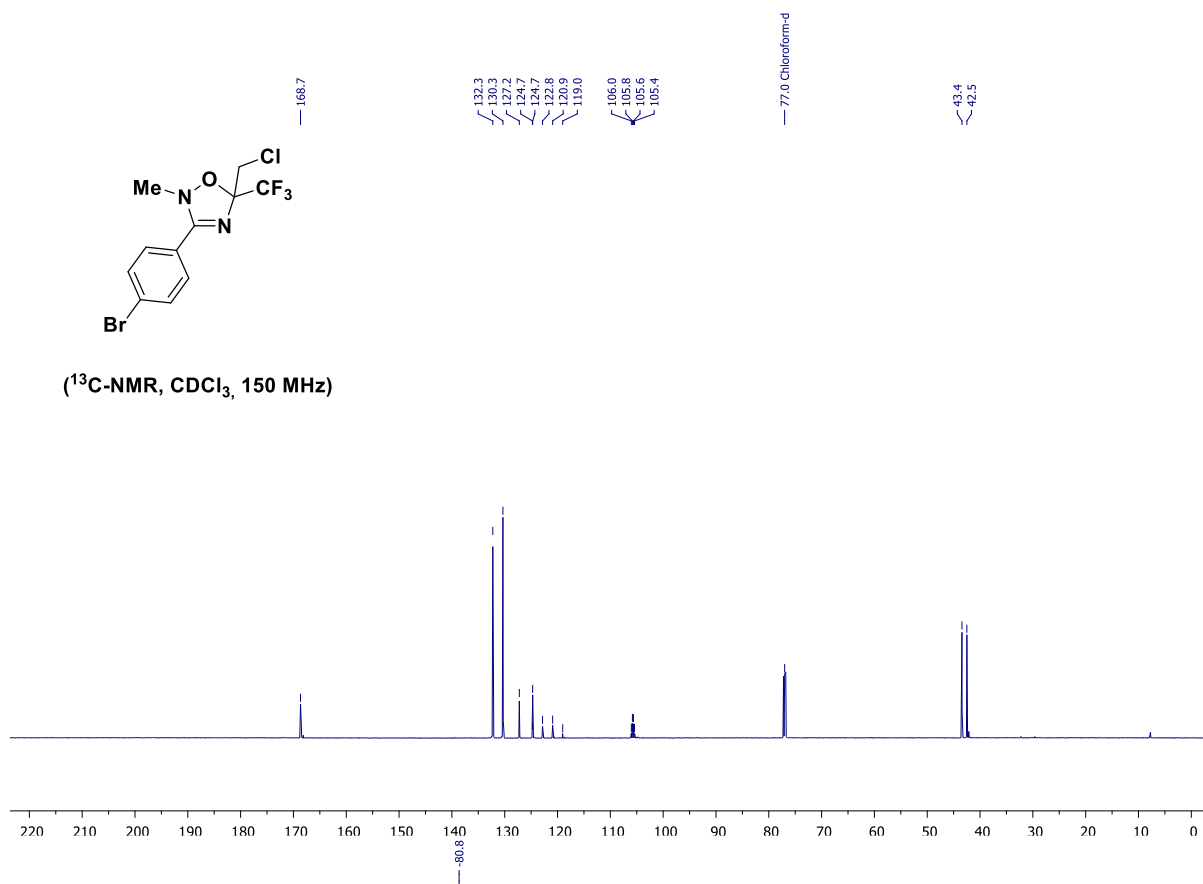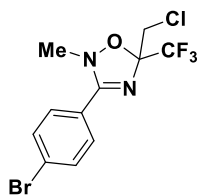

(<sup>19</sup>F-NMR, CDCl<sub>3</sub>, 565 MHz)

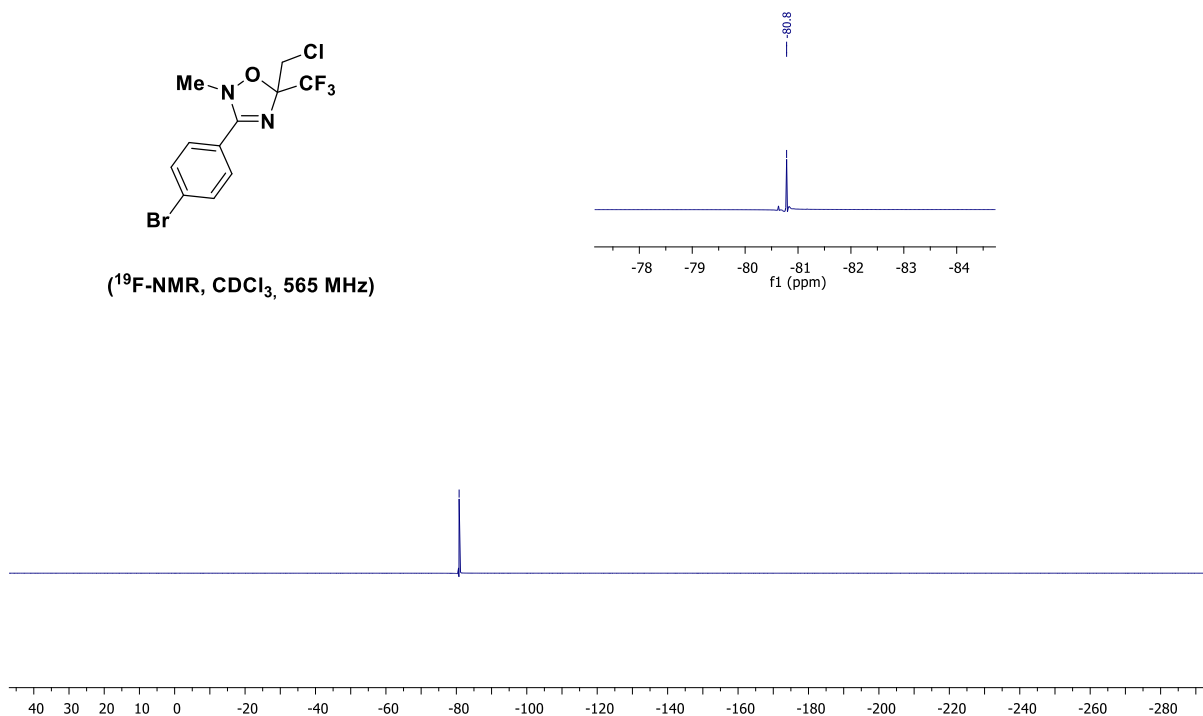



5-(chloromethyl)-3-(4-fluorophenyl)-2-methyl-5-(trifluoromethyl)-2,5-dihydro-1,2,4-oxadiazole (4)

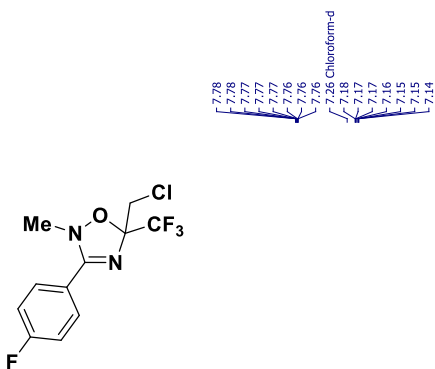

(<sup>1</sup>H-NMR, CDCl<sub>3</sub>, 600 MHz)

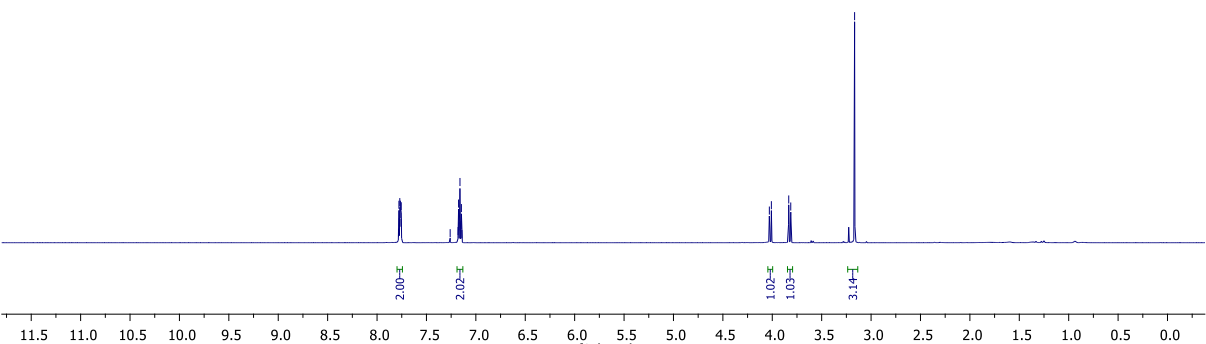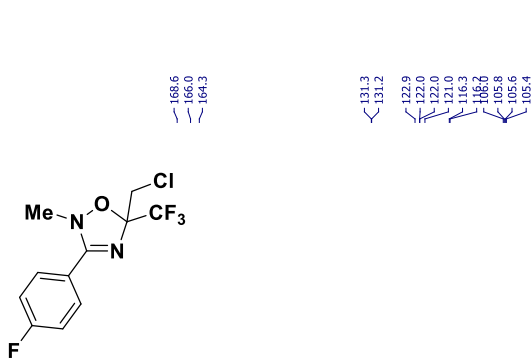

(<sup>13</sup>C-NMR, CDCl<sub>3</sub>, 150 MHz)

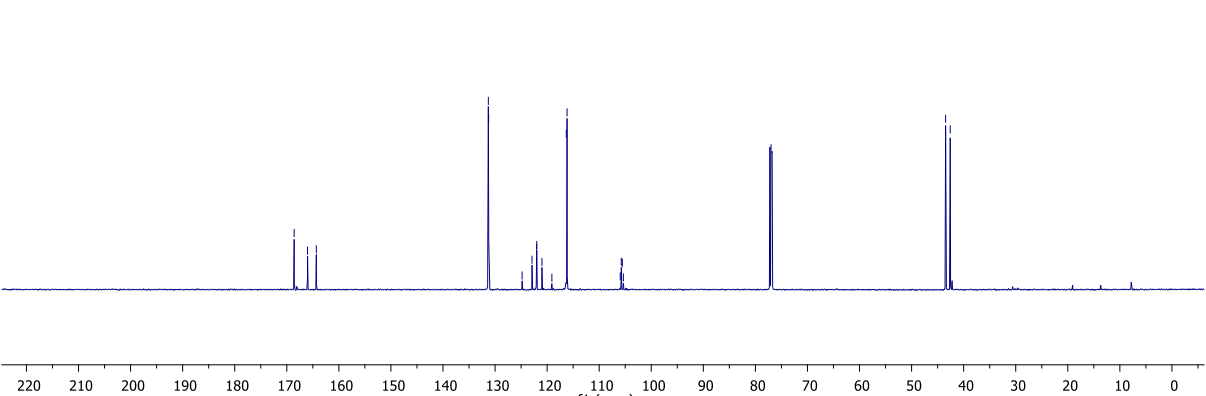



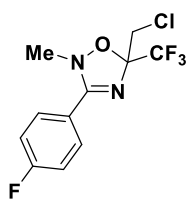

(<sup>19</sup>F-NMR, CDCl<sub>3</sub>, 565 MHz)

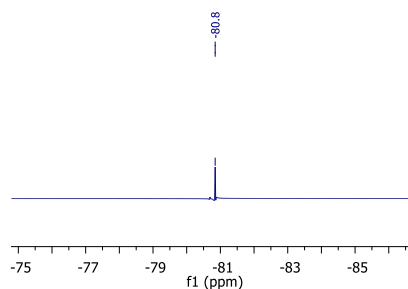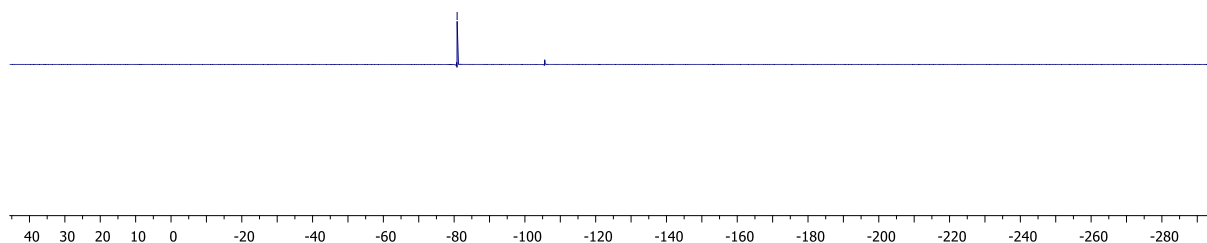

Isopropyl 3-(5-(chloromethyl)-2-methyl-5-(trifluoromethyl)-2,5-dihydro-1,2,4-oxadiazol-3-yl)benzoate (5)

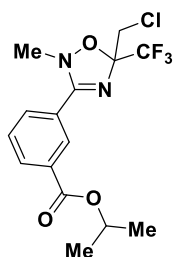

(<sup>1</sup>H-NMR, CDCl<sub>3</sub>, 400 MHz)

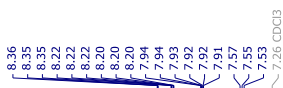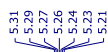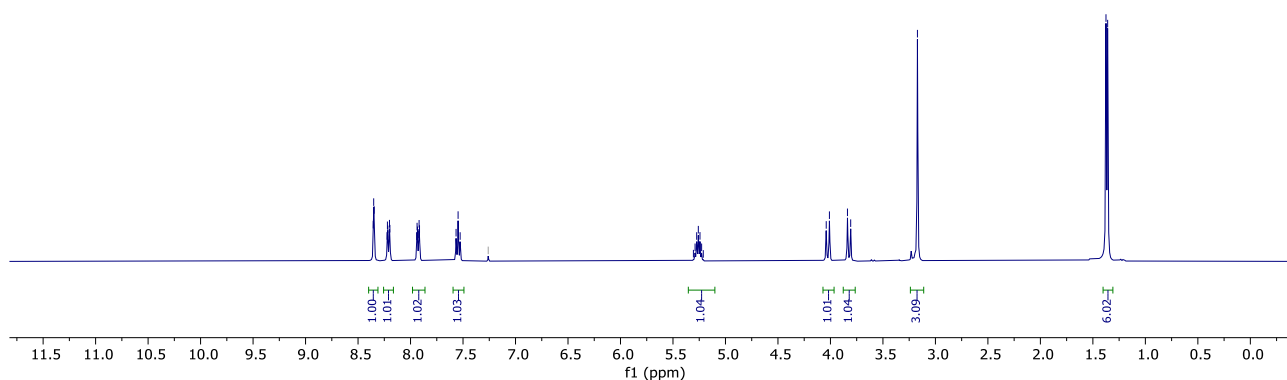



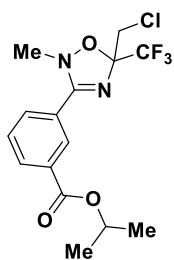

(<sup>13</sup>C-NMR, CDCl<sub>3</sub>, 100 MHz)

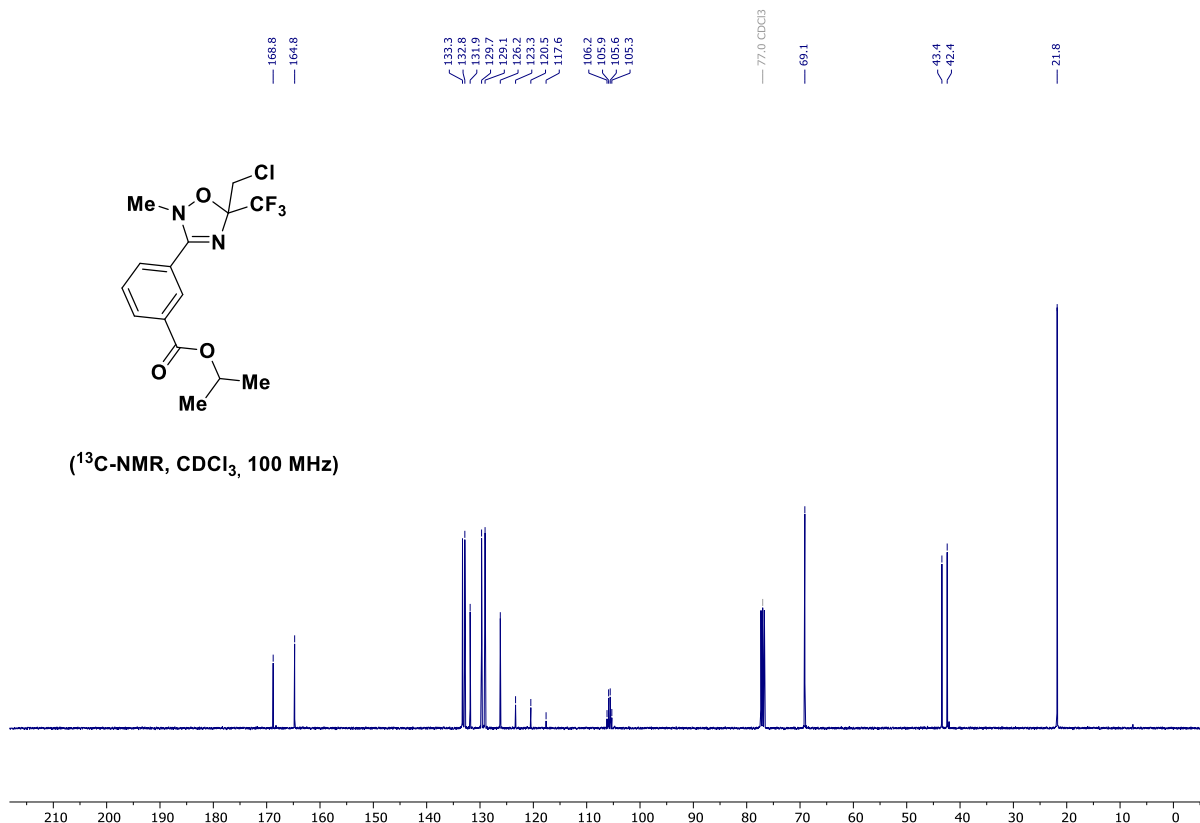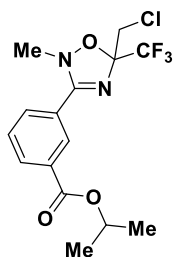

(<sup>19</sup>F-NMR, CDCl<sub>3</sub>, 377 MHz)

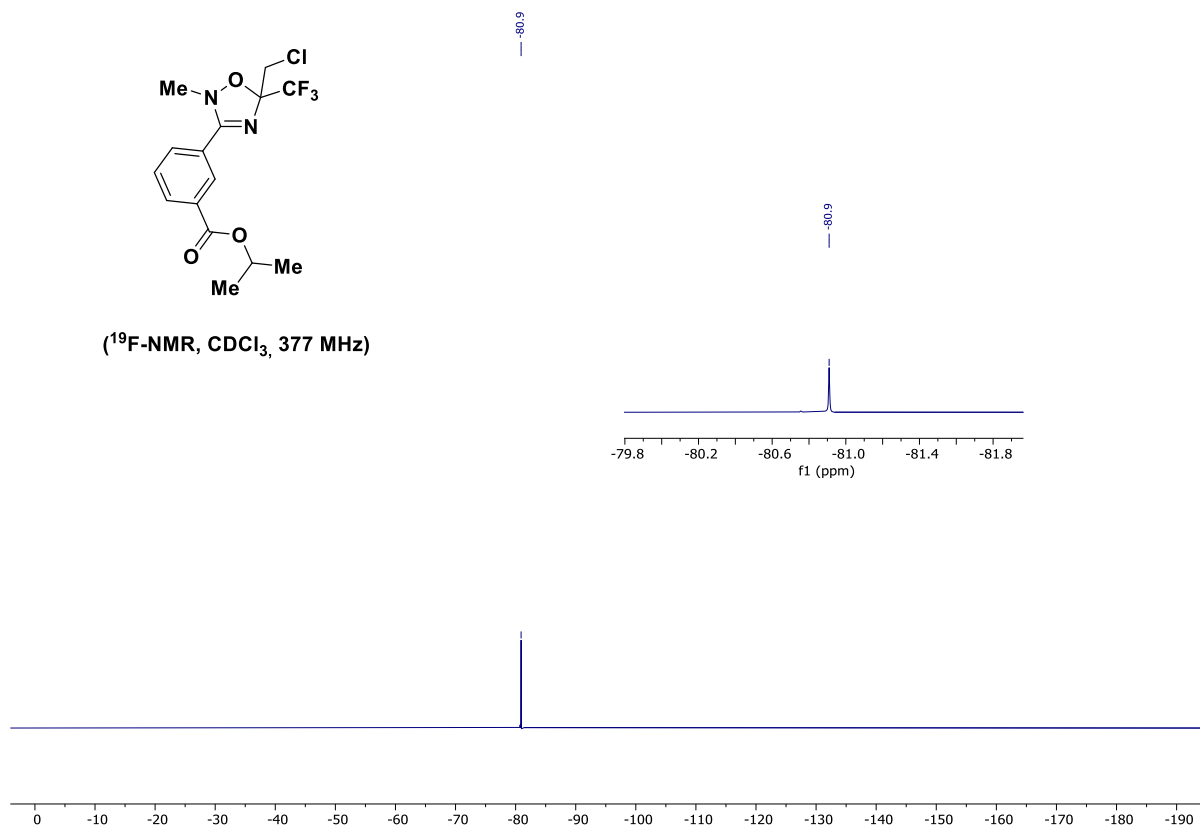



**4-(5-(chloromethyl)-2-methyl-5-(trifluoromethyl)-2,5-dihydro-1,2,4-oxadiazol-3-yl) benzonitrile (6)**

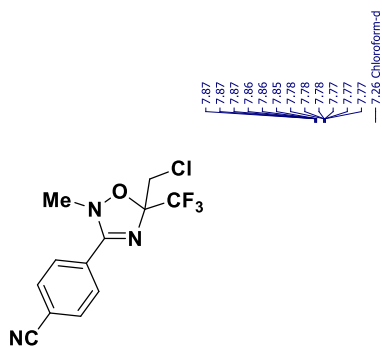

(<sup>1</sup>H-NMR, CDCl<sub>3</sub>, 600 MHz)

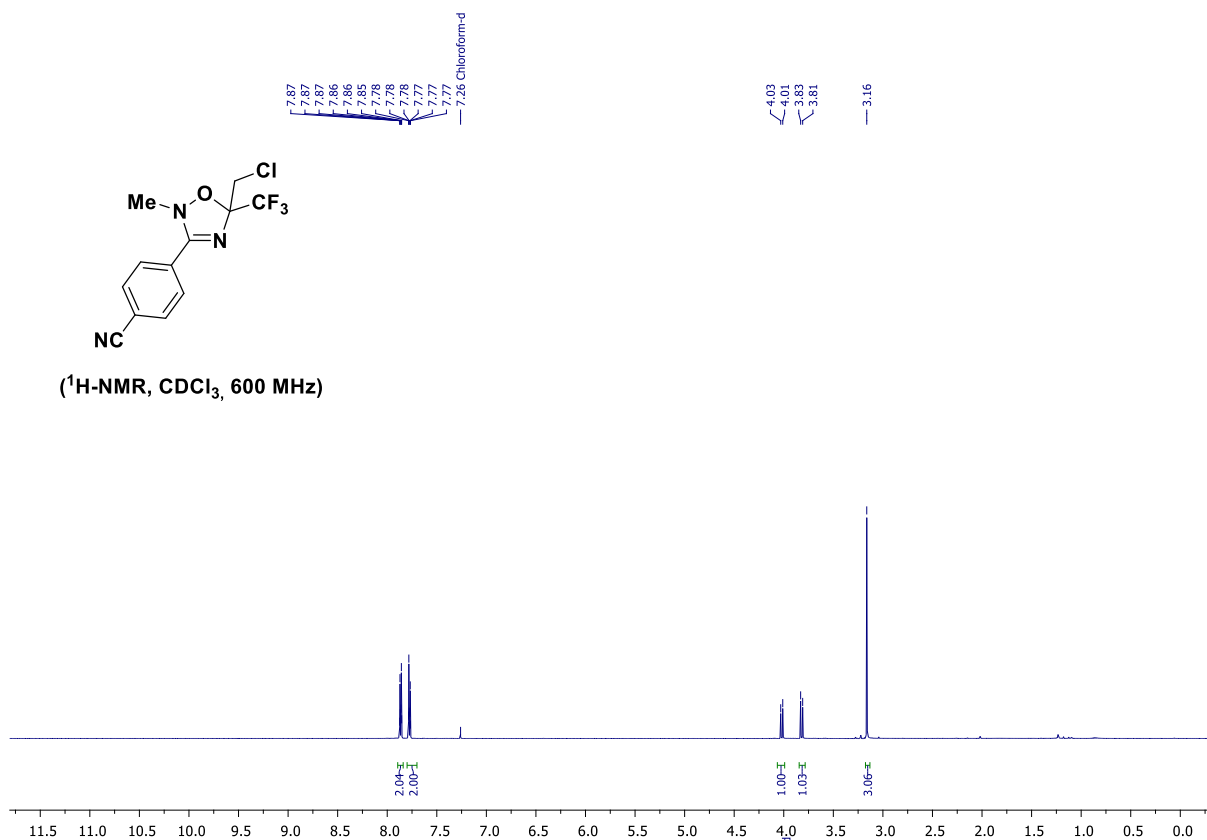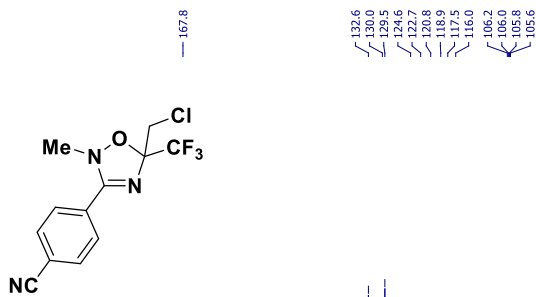

(<sup>13</sup>C-NMR, CDCl<sub>3</sub>, 150 MHz)

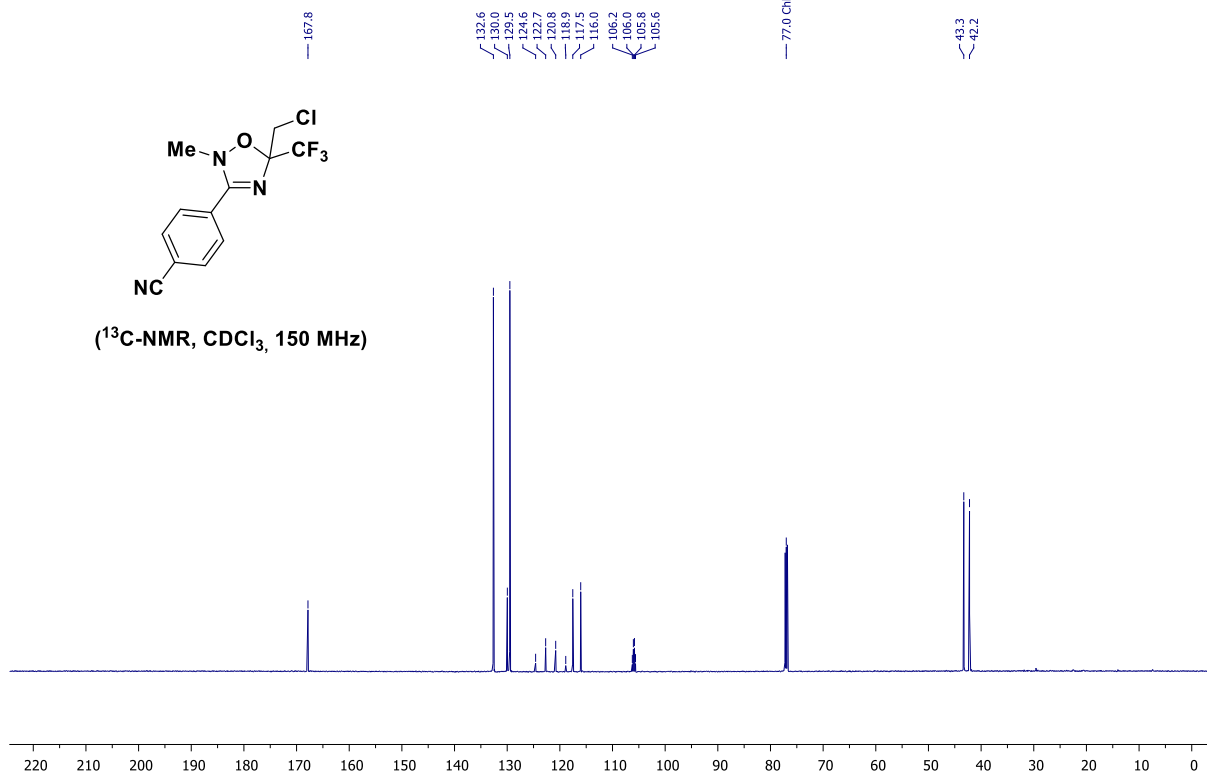



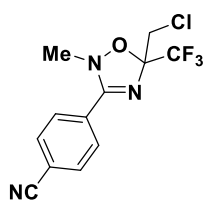

(<sup>19</sup>F-NMR, CDCl<sub>3</sub>, 565 MHz)

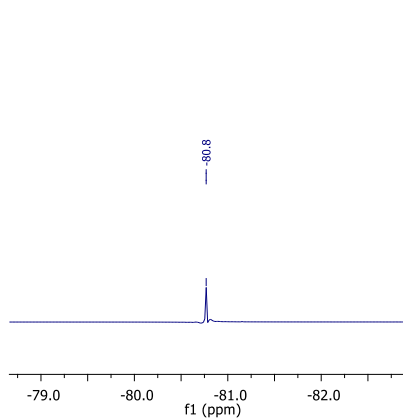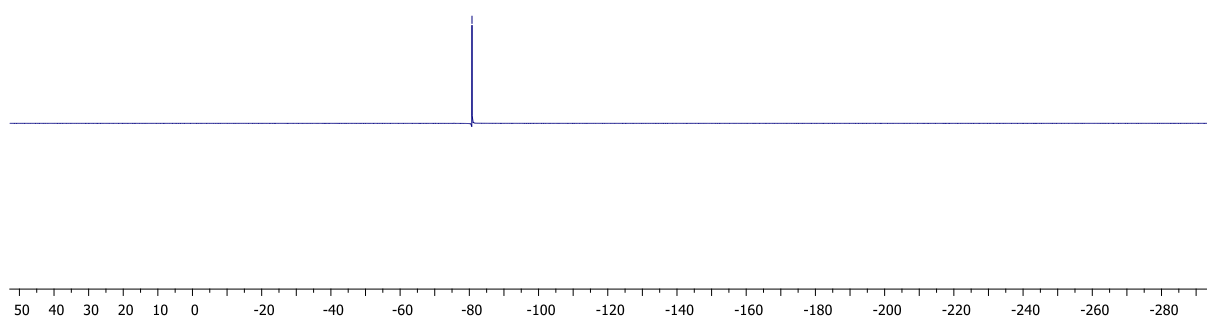

5-(chloromethyl)-2-methyl-3-(pyridin-2-yl)-5-(trifluoromethyl)-2,5-dihydro-1,2,4-oxadiazole

(7)

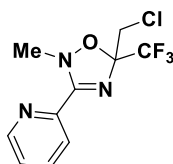

(<sup>1</sup>H-NMR, CDCl<sub>3</sub>, 600 MHz)

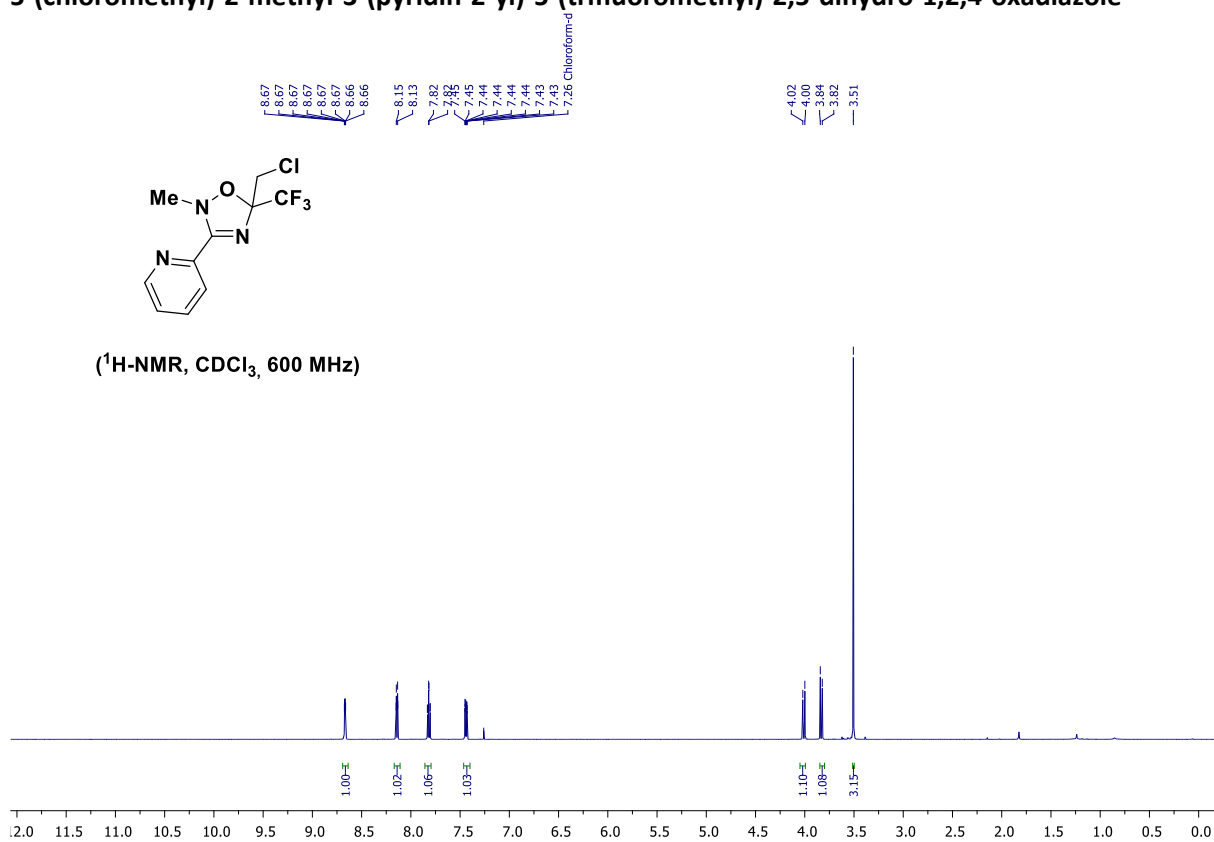



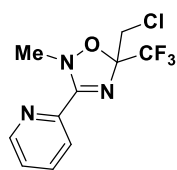

(<sup>13</sup>C-NMR, CDCl<sub>3</sub>, 150 MHz)

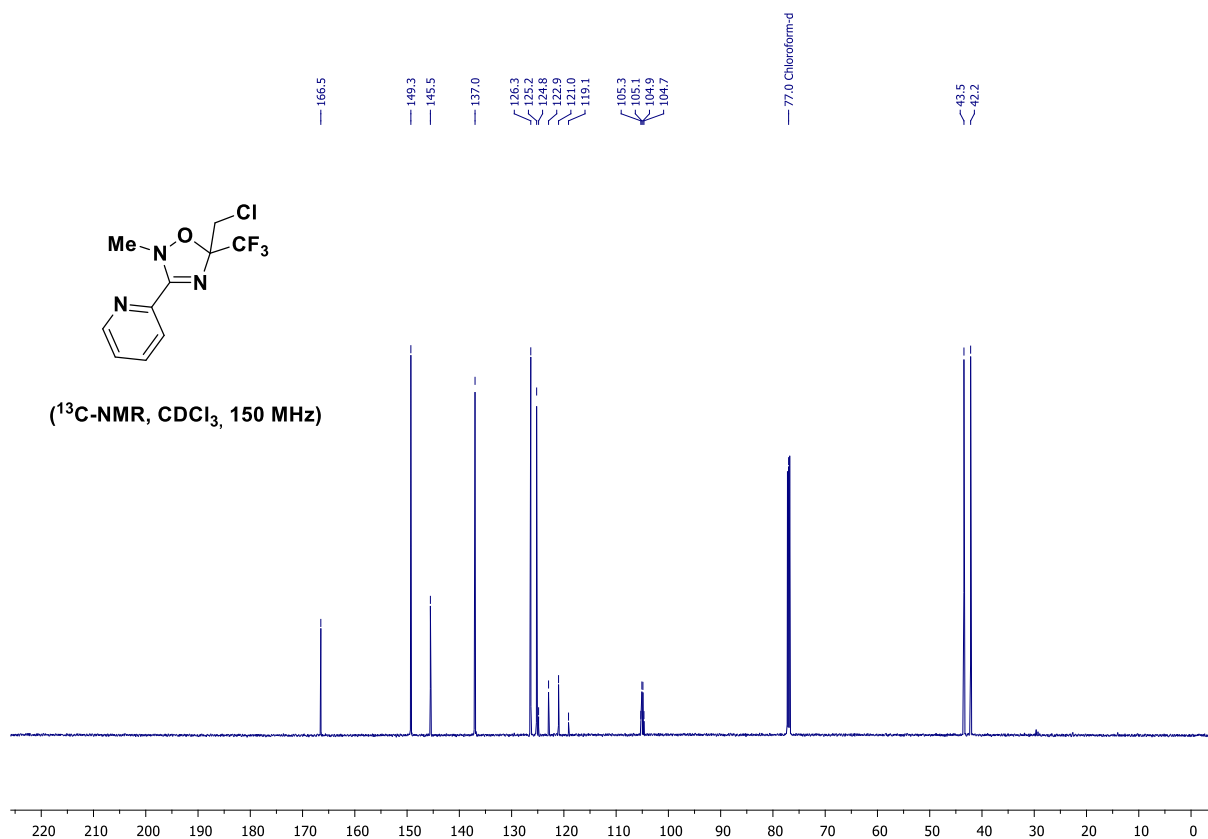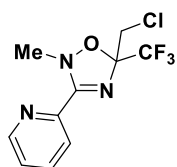

(<sup>19</sup>F-NMR, CDCl<sub>3</sub>, 565 MHz)

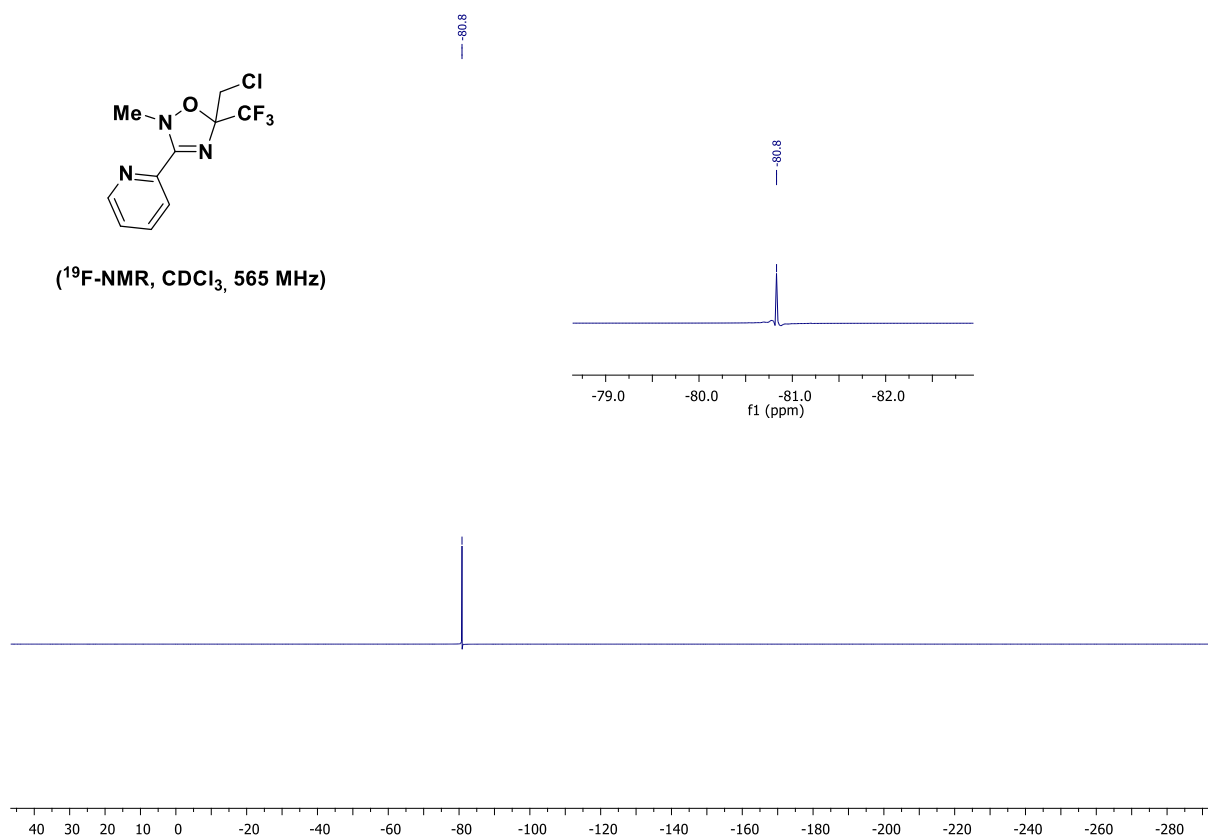



**5-(chloromethyl)-2-methyl-3-phenyl-5-(trifluoromethyl)-2,5-dihydro-1,2,4-oxadiazole (8)**

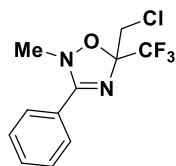

(<sup>1</sup>H-NMR, CDCl<sub>3</sub>, 600 MHz)

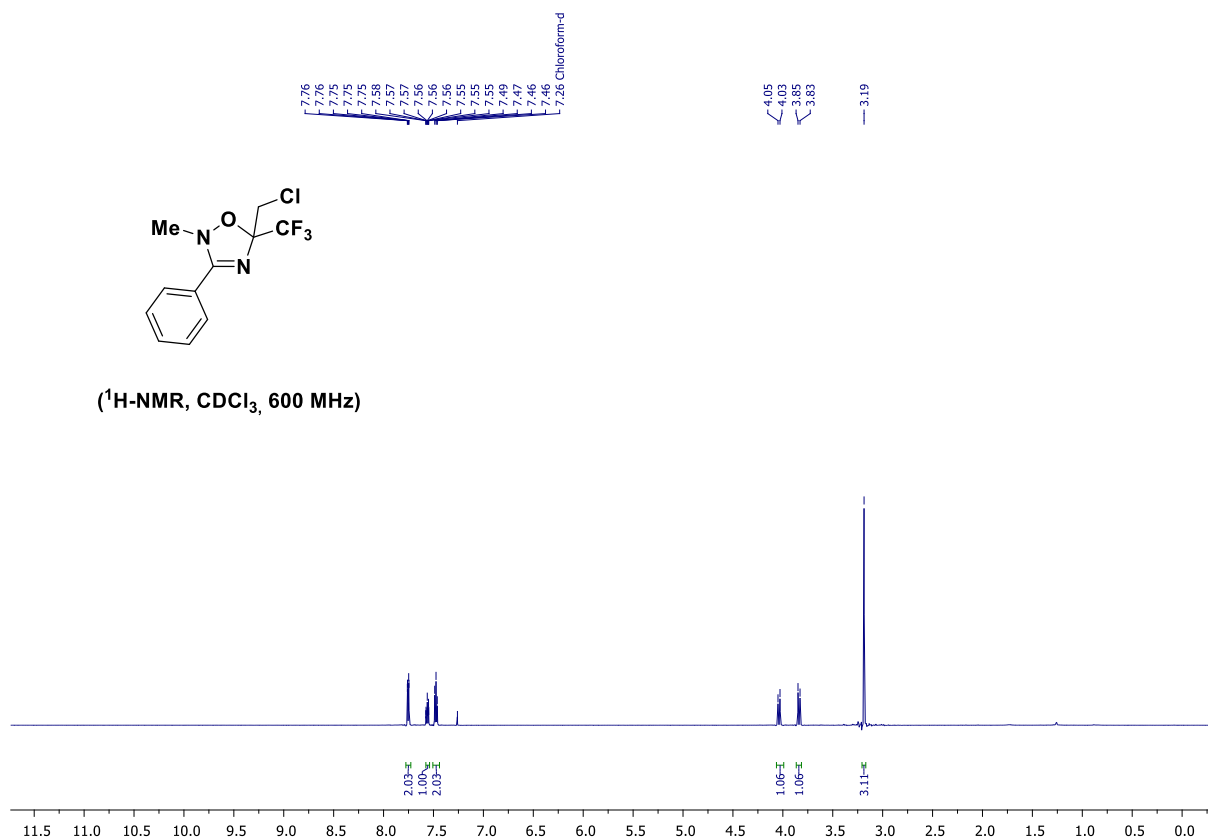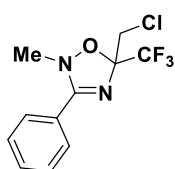

(<sup>13</sup>C-NMR, CDCl<sub>3</sub>, 150 MHz)

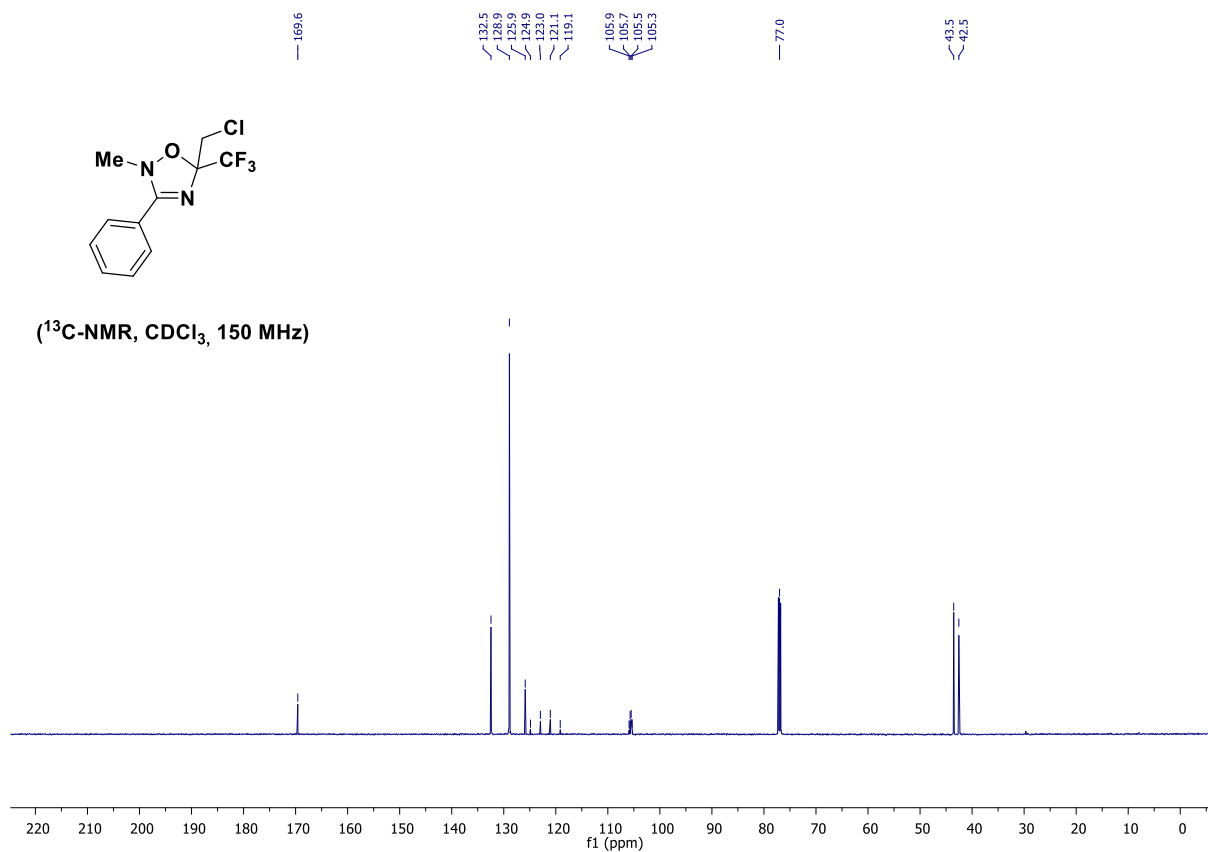



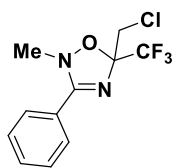

( $^{19}\text{F}$ -NMR,  $\text{CDCl}_3$ , 565 MHz)

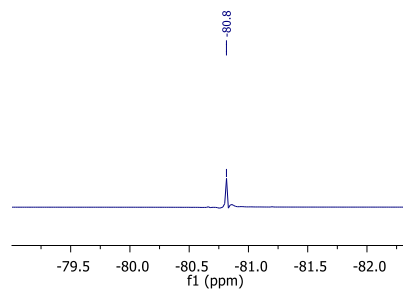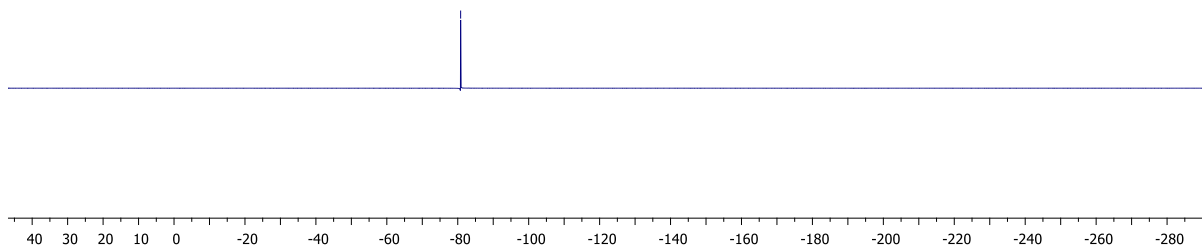

### 3-(4-chlorophenyl)-5-(fluoromethyl)-2-methyl-5-(trifluoromethyl)-2,5-dihydro-1,2,4-oxadiazole (9)

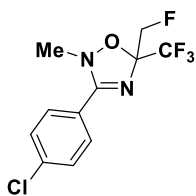

( $^1\text{H}$ -NMR,  $\text{CDCl}_3$ , 600 MHz)

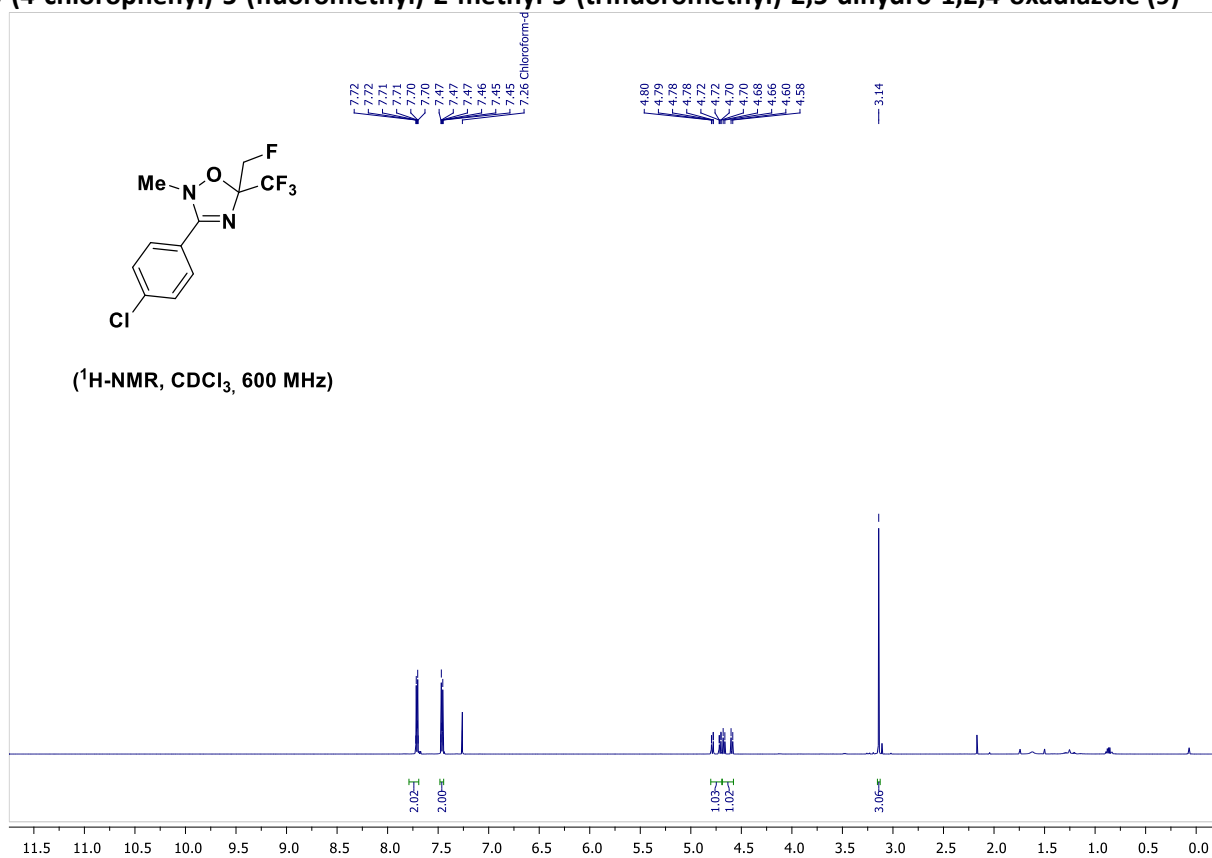



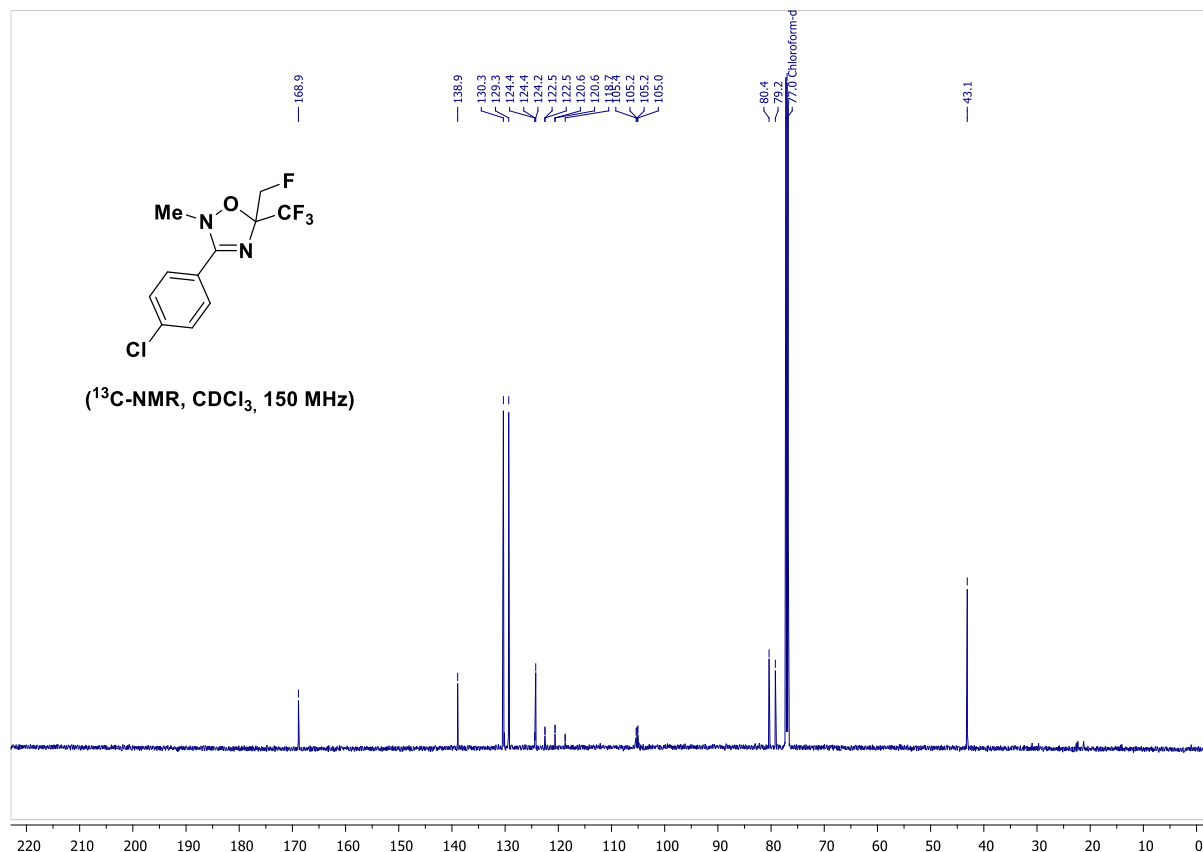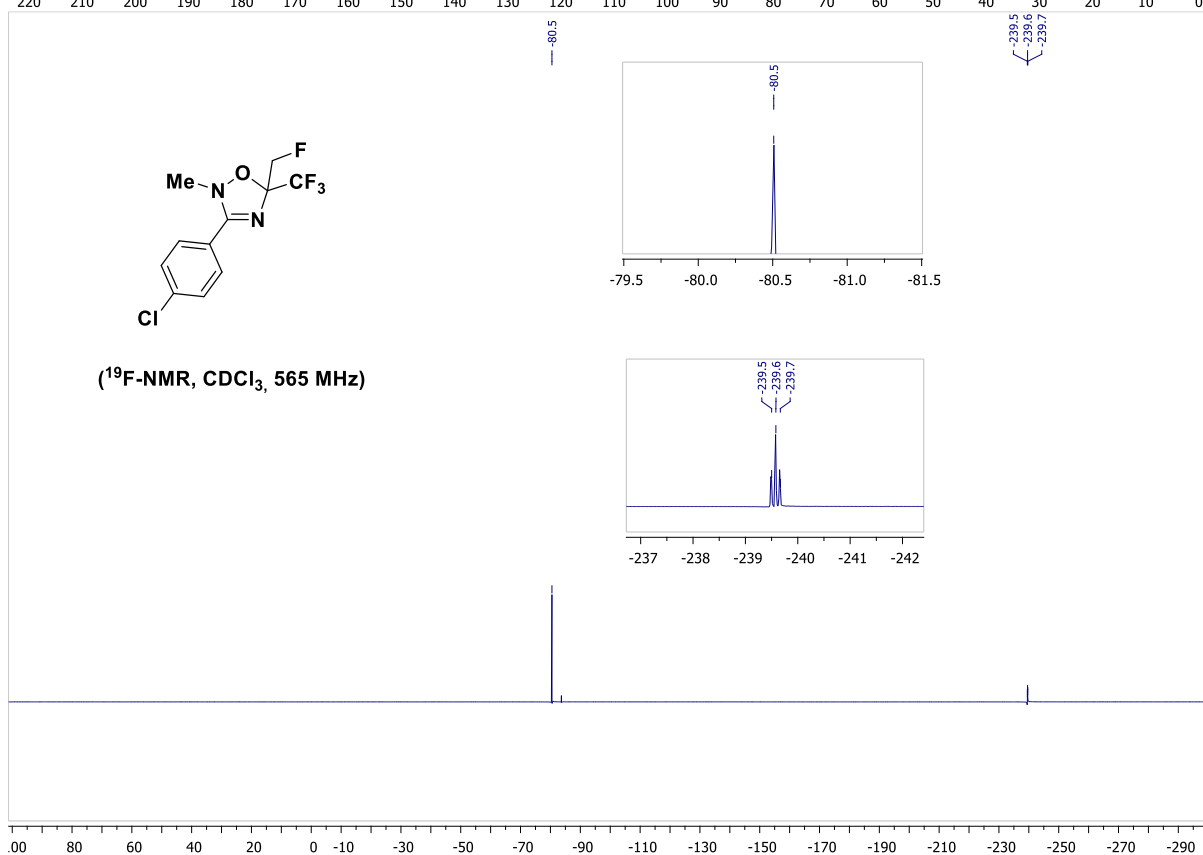



**5-(fluoromethyl)-2-methyl-5-(trifluoromethyl)-3-(4-(trifluoromethyl)phenyl)-2,5-dihydro-1,2,4-oxadiazole (10)**

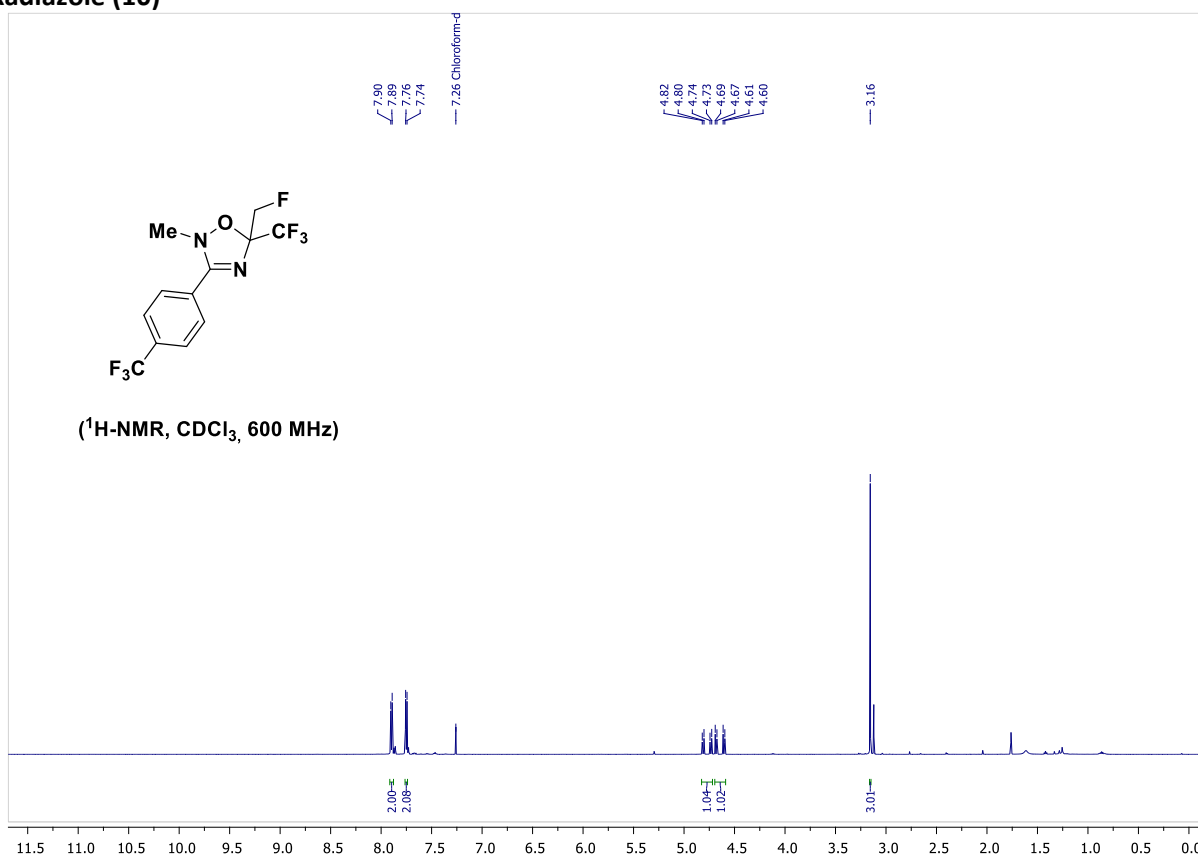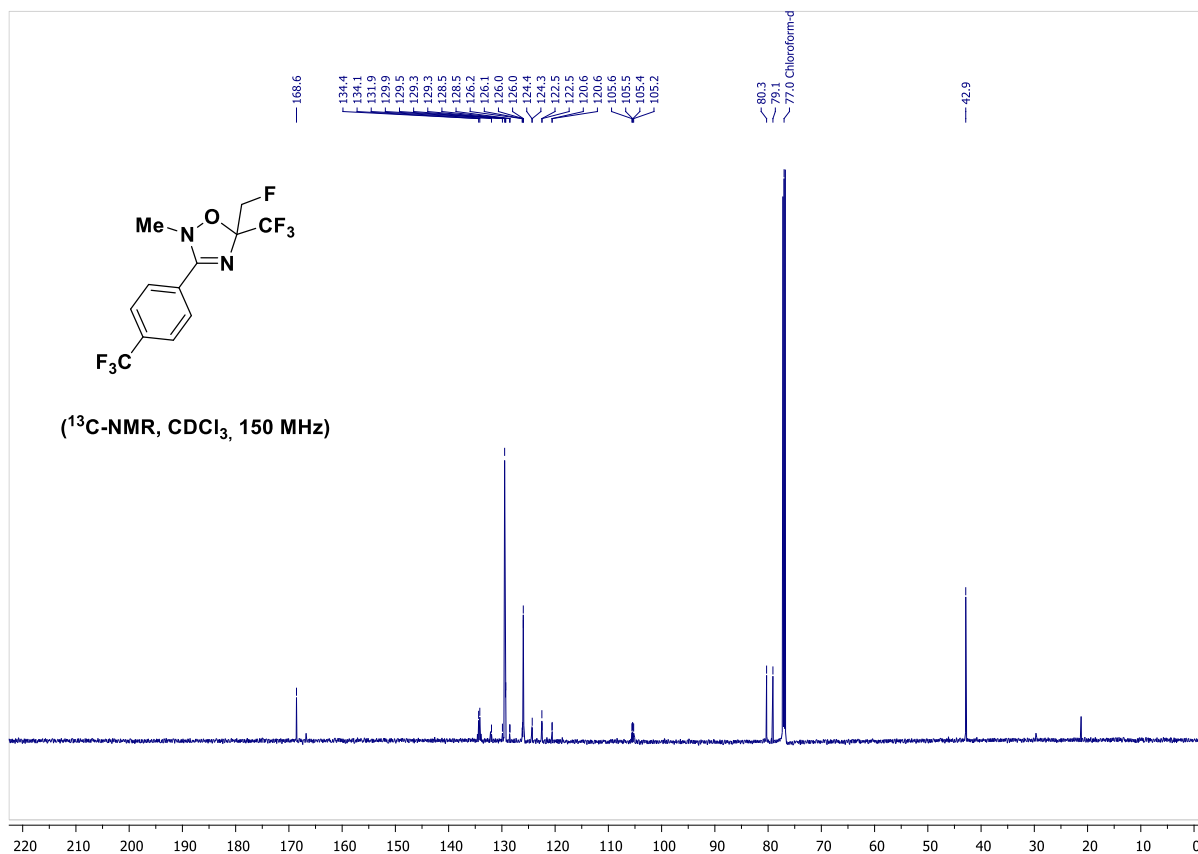



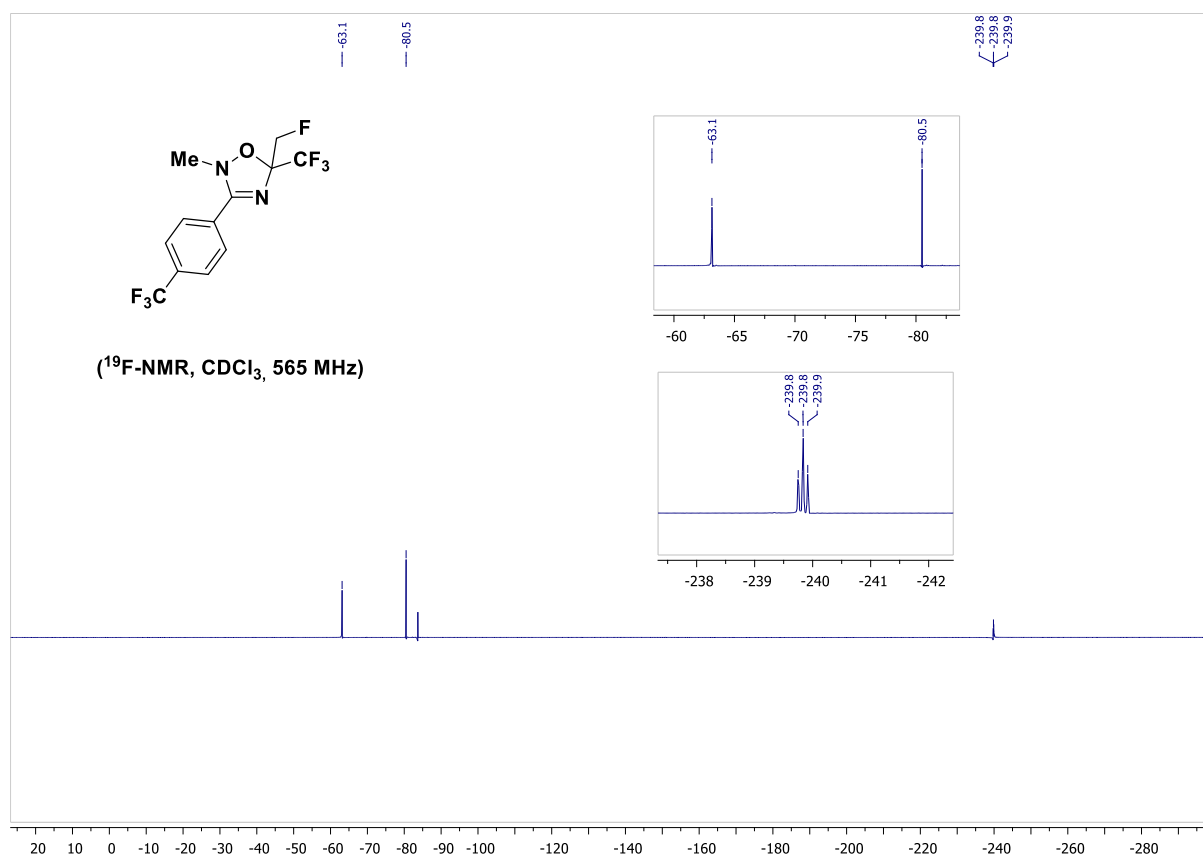

**4-(5-(fluoromethyl)-2-methyl-5-(trifluoromethyl)-2,5-dihydro-1,2,4-oxadiazol-3-yl)benzonitrile (11)**

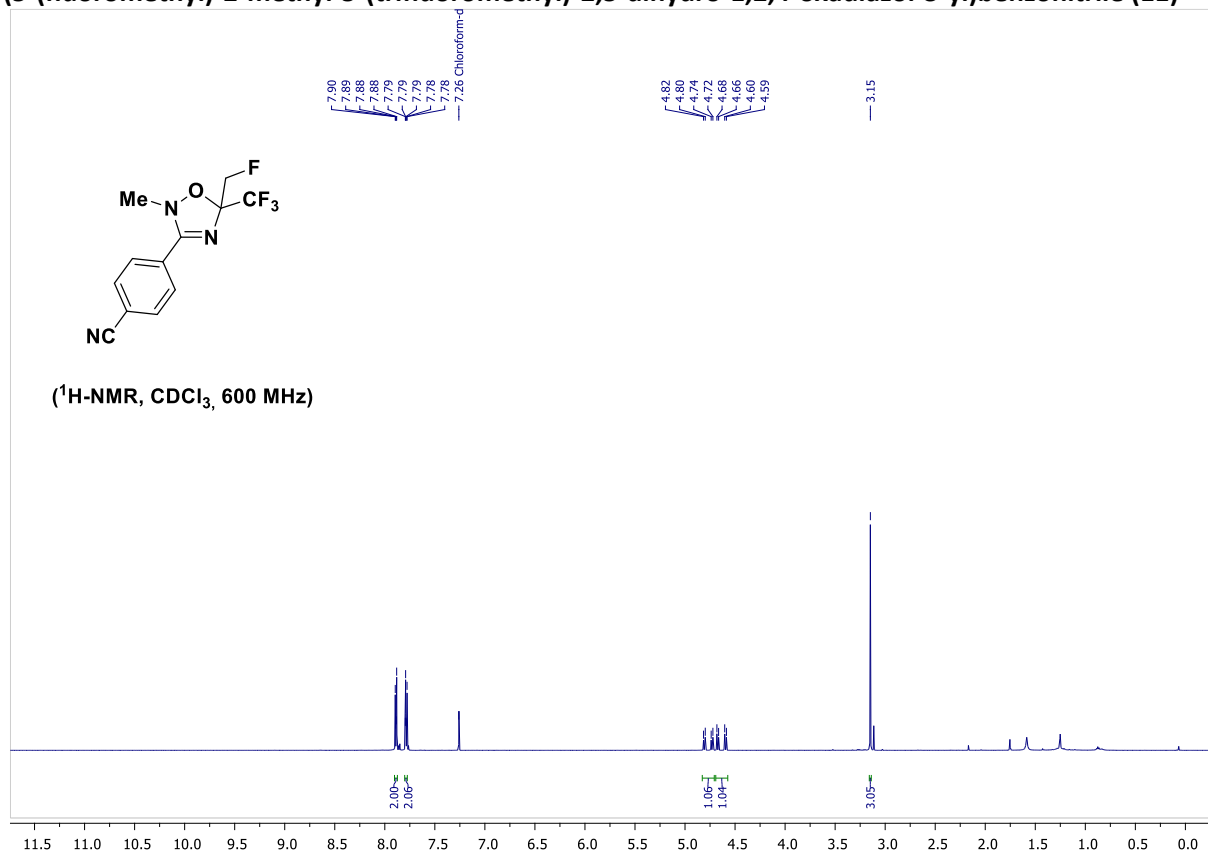



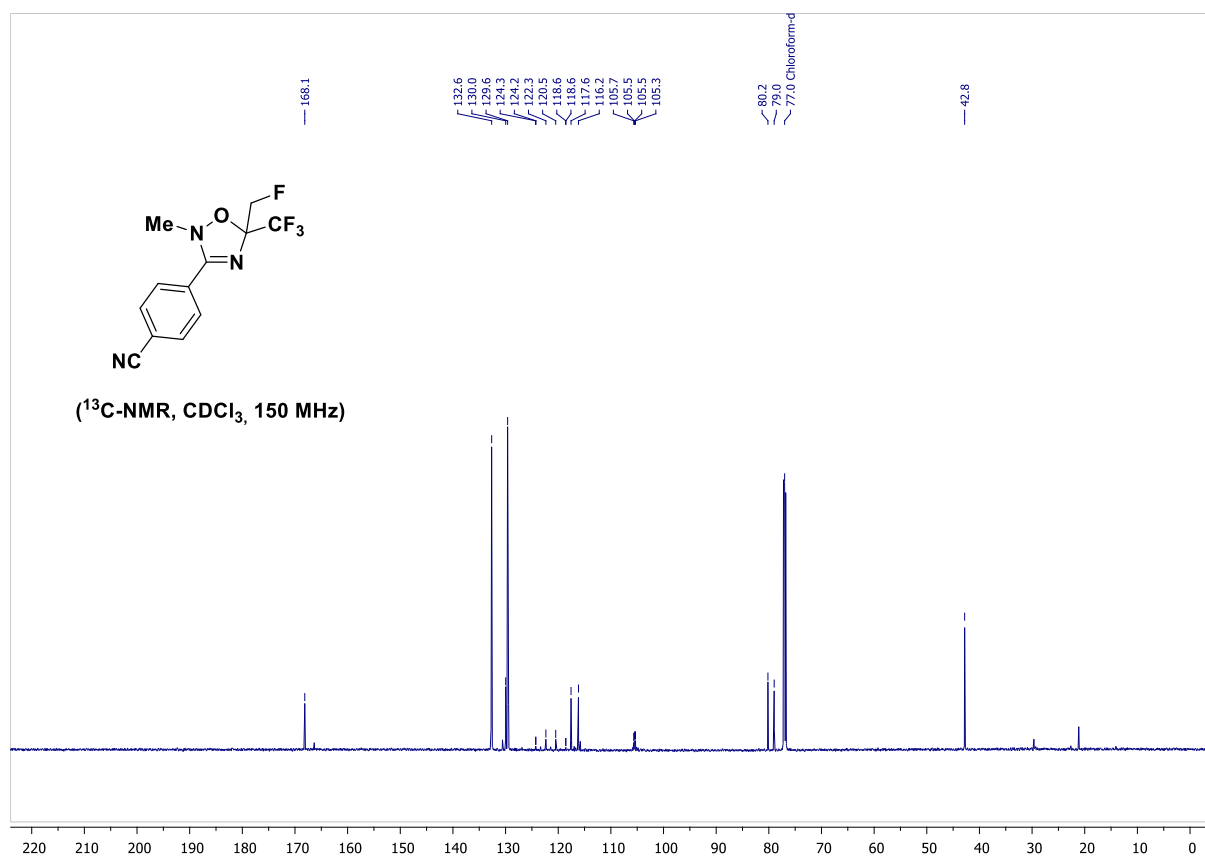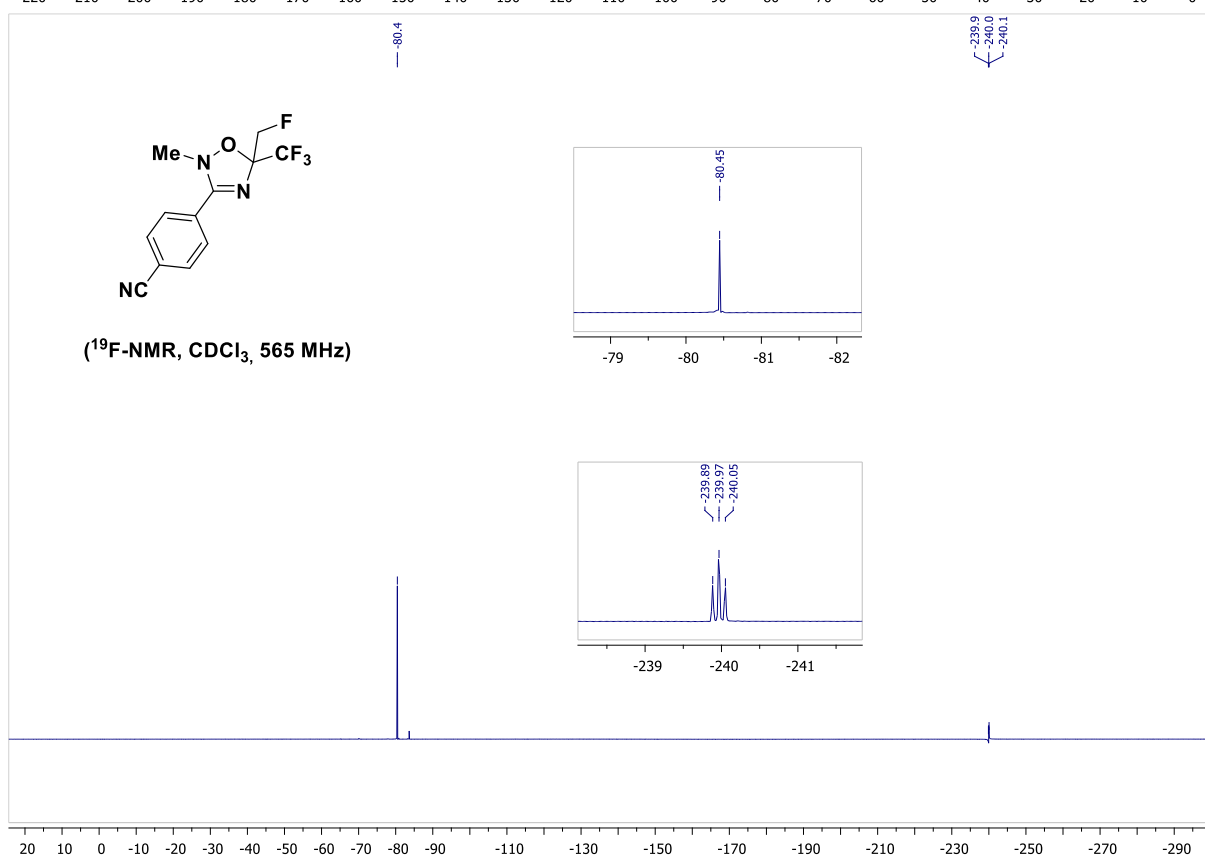



**5-(fluoromethyl)-2-methyl-3-(4-nitrophenyl)-5-(trifluoromethyl)-2,5-dihydro-1,2,4-oxadiazole (12)**

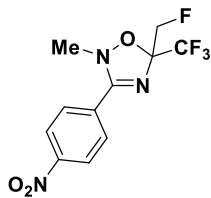

(<sup>1</sup>H-NMR, CDCl<sub>3</sub>, 600 MHz)

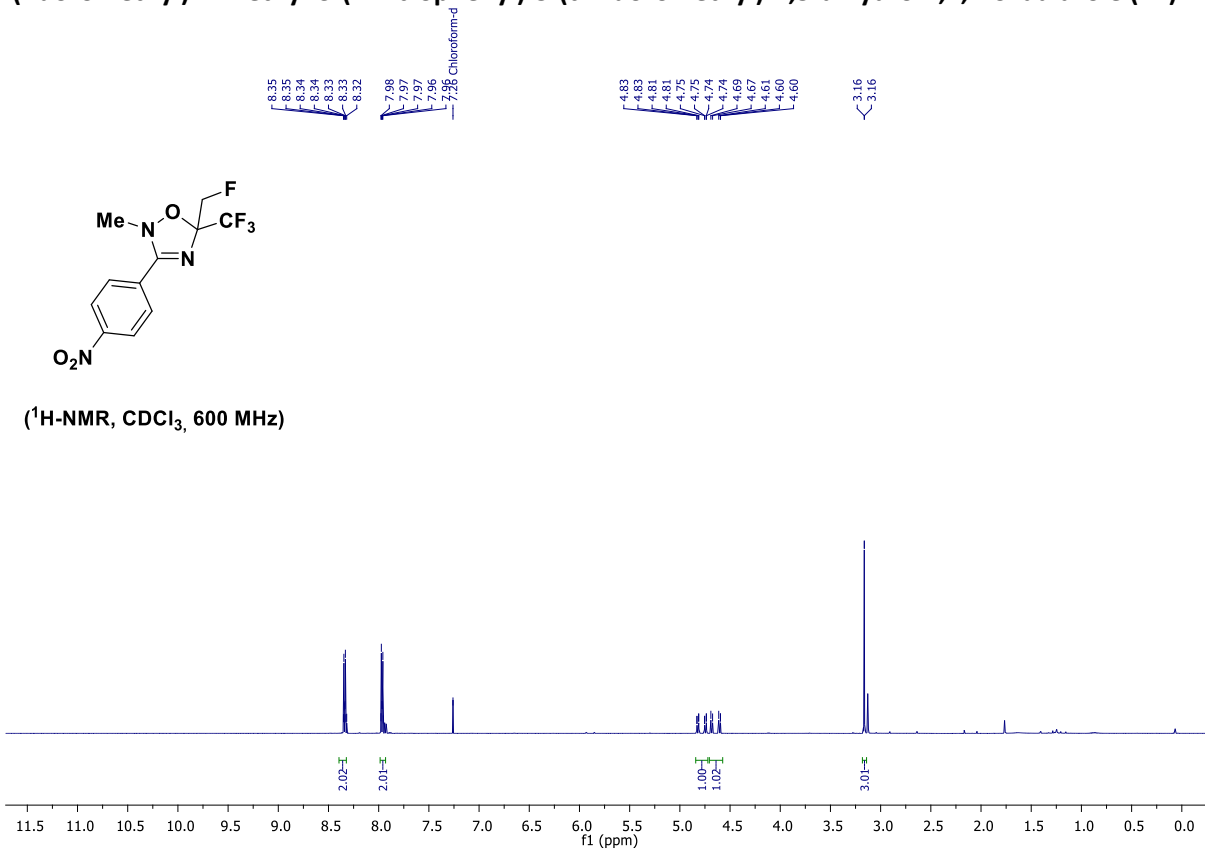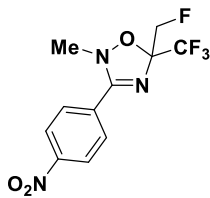

(<sup>13</sup>C-NMR, CDCl<sub>3</sub>, 150 MHz)

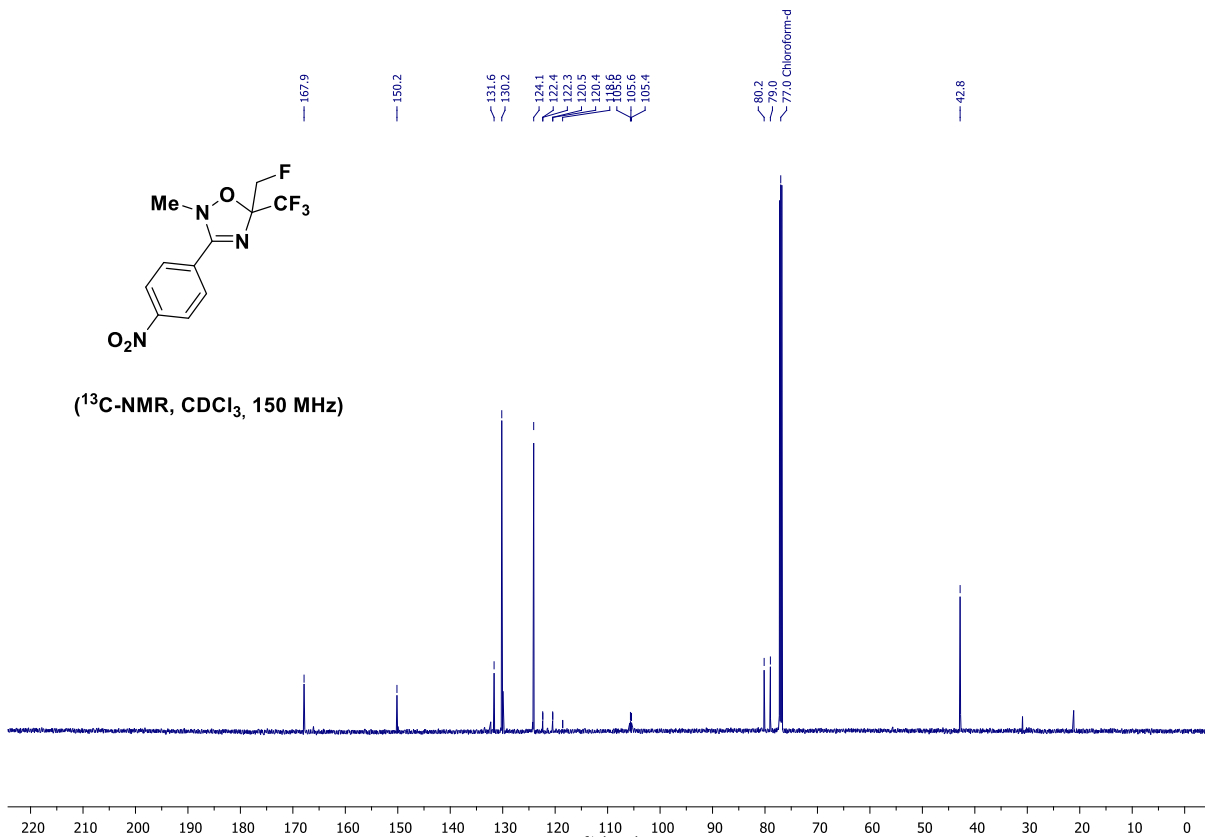



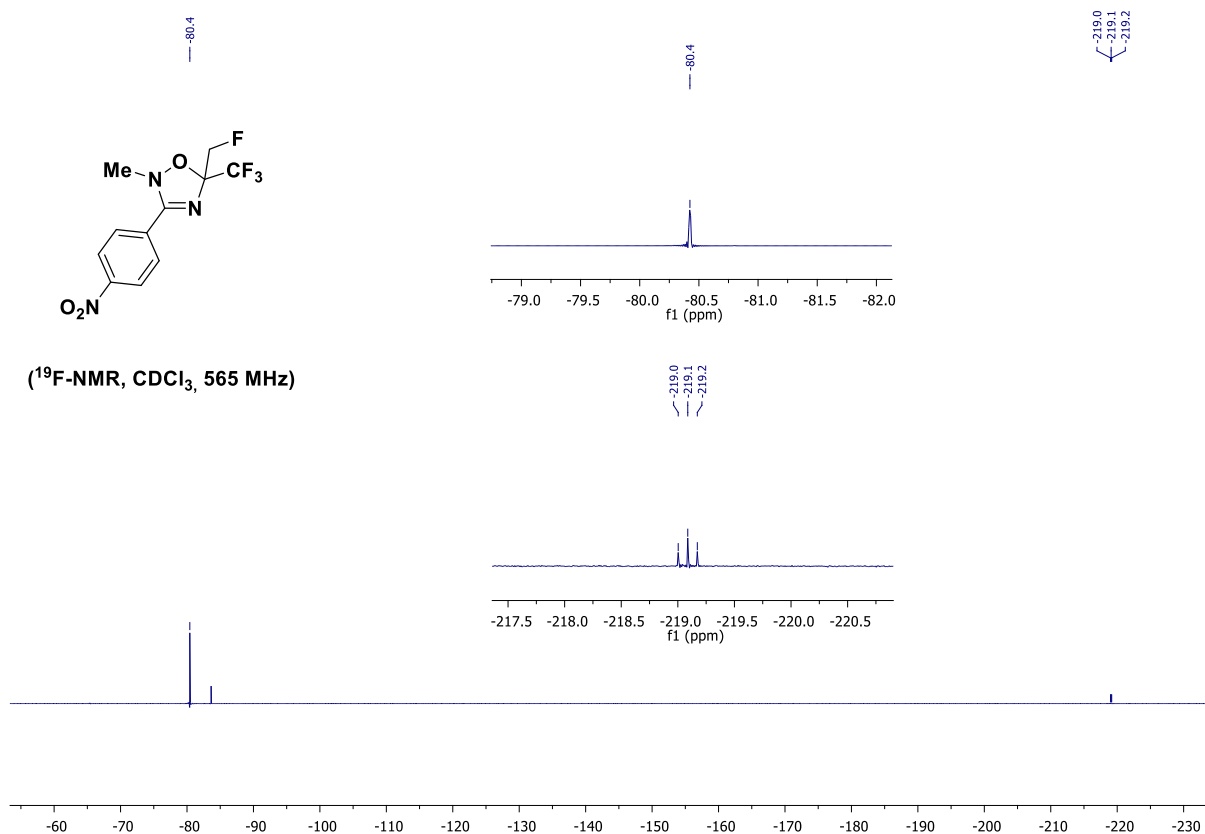

### 5-(fluoromethyl)-2-methyl-3-(thiophen-2-yl)-5-(trifluoromethyl)-2,5-dihydro-1,2,4-oxadiazole (13)

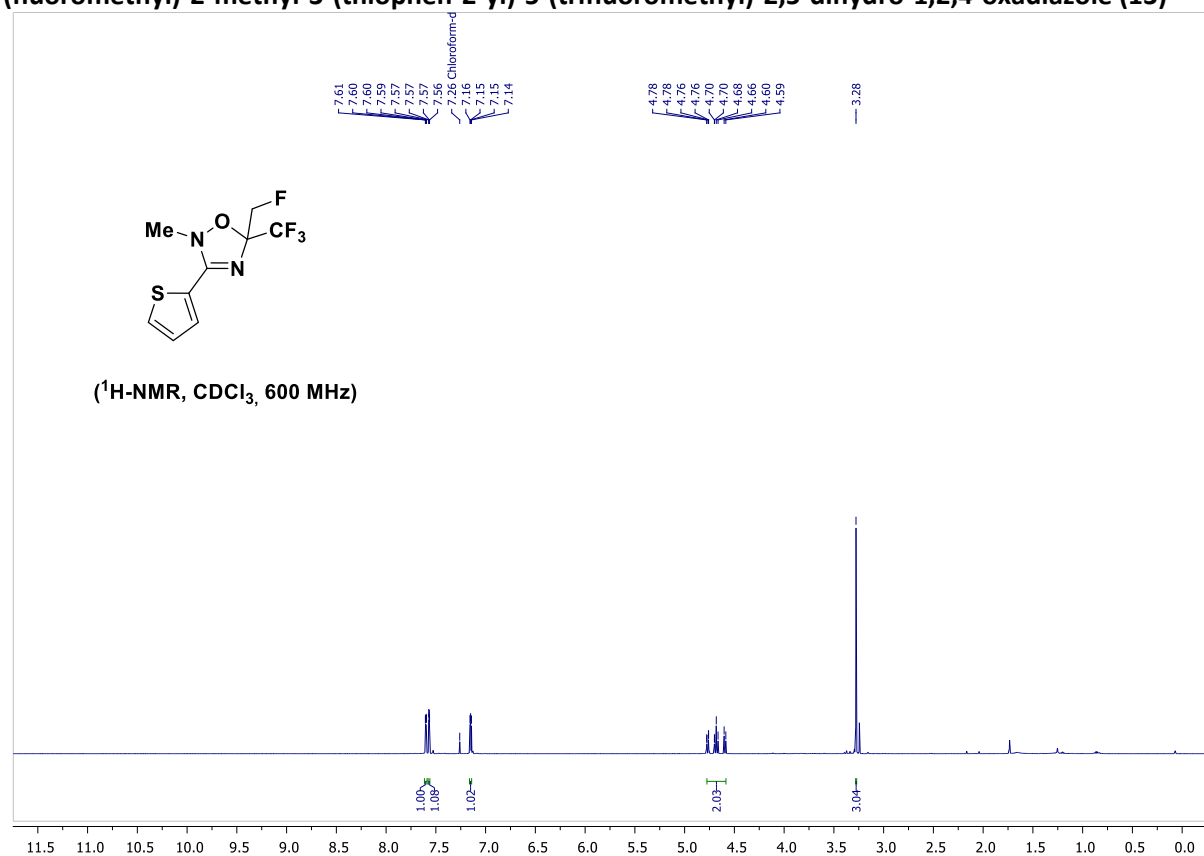



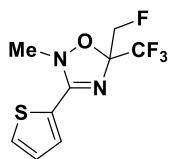

( $^{13}\text{C}$ -NMR,  $\text{CDCl}_3$ , 150 MHz)

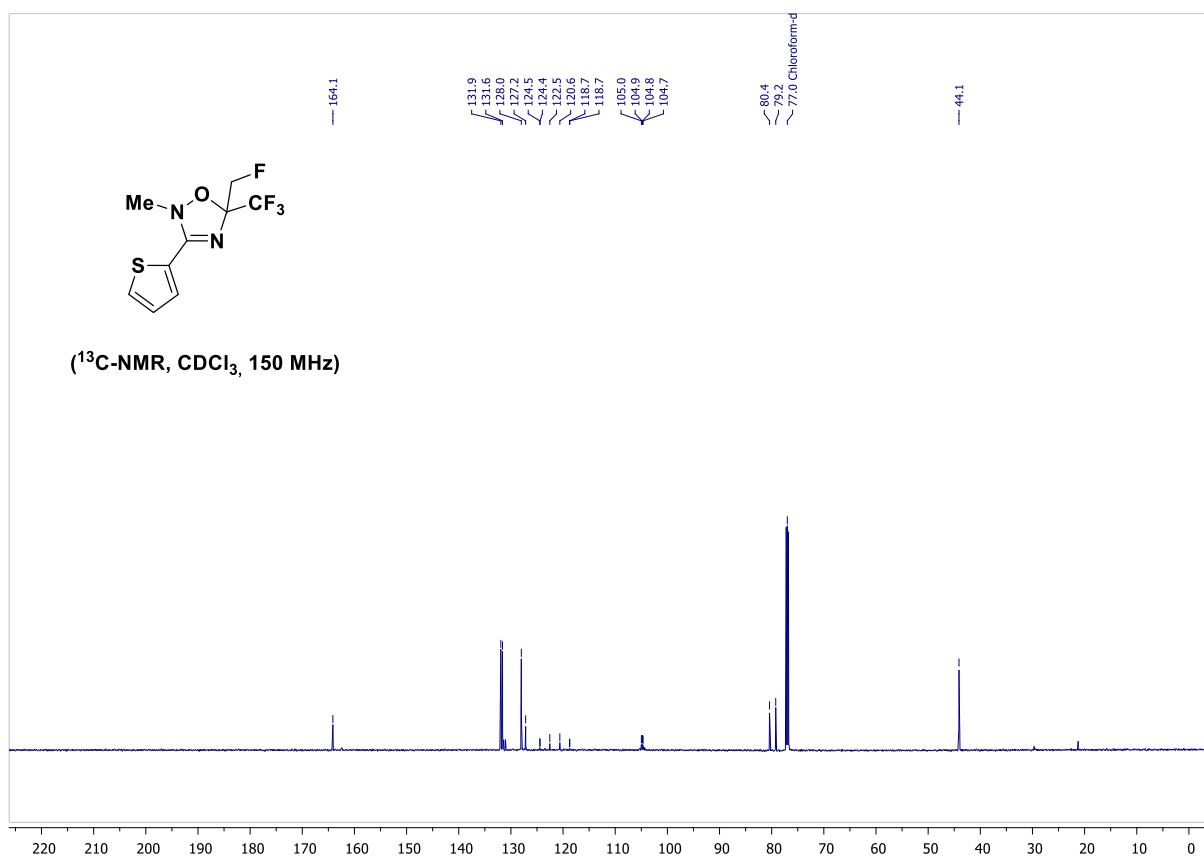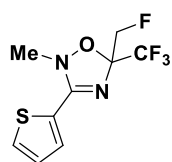

( $^{19}\text{F}$ -NMR,  $\text{CDCl}_3$ , 565 MHz)

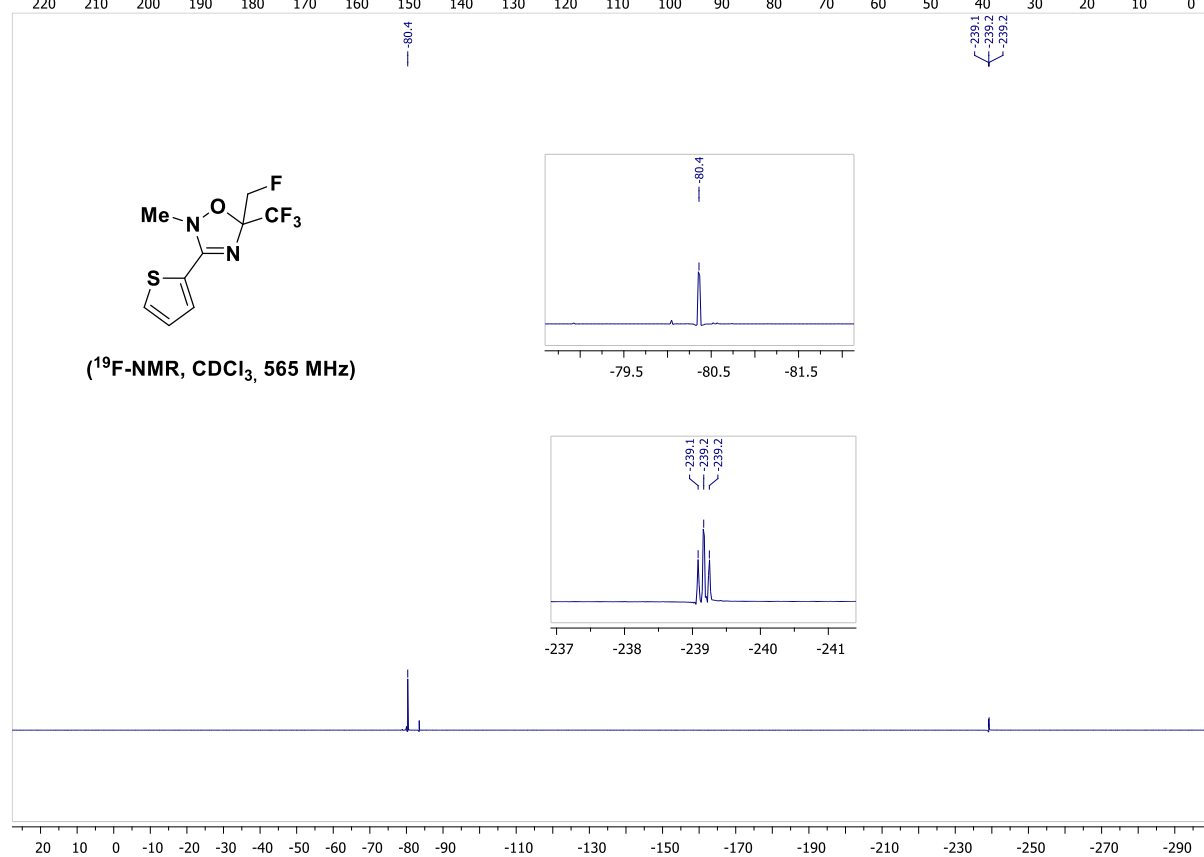



### 3-(4-bromophenyl)-5-(iodomethyl)-4-methyl-5-(trifluoromethyl)-4,5-dihydro-1,2,4-oxadiazole (3)

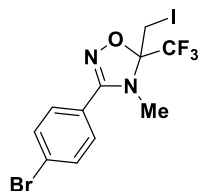

(<sup>1</sup>H-NMR, CDCl<sub>3</sub>, 600 MHz)

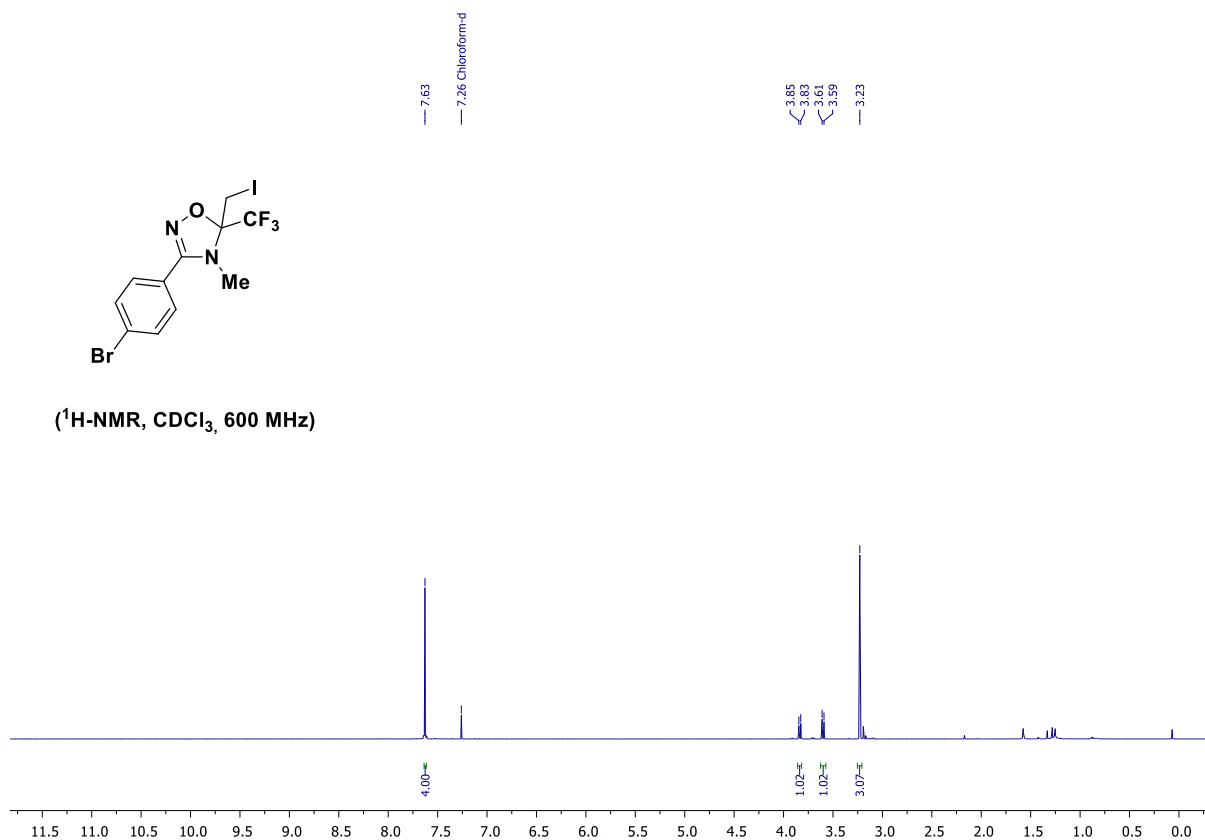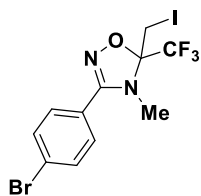

(<sup>13</sup>C-NMR, CDCl<sub>3</sub>, 150 MHz)

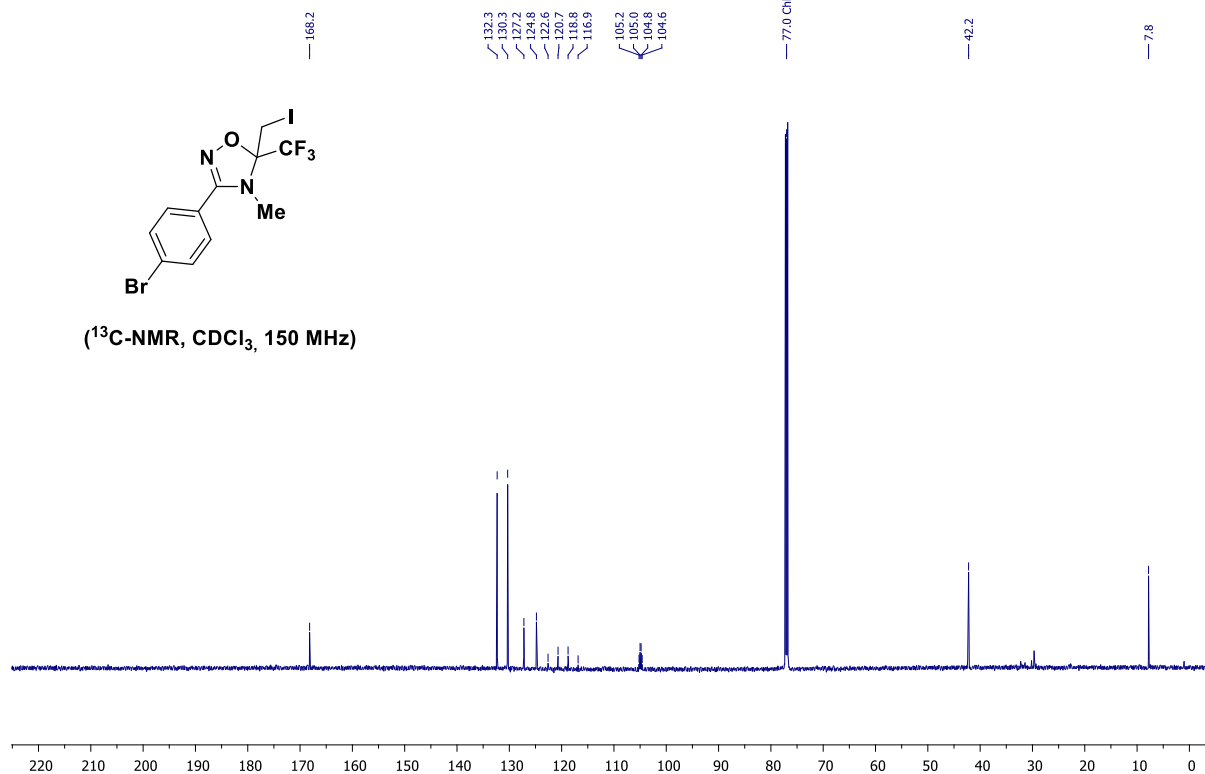



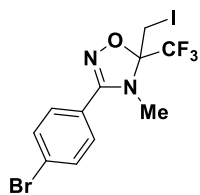

( $^{19}\text{F}$ -NMR,  $\text{CDCl}_3$ , 565 MHz)

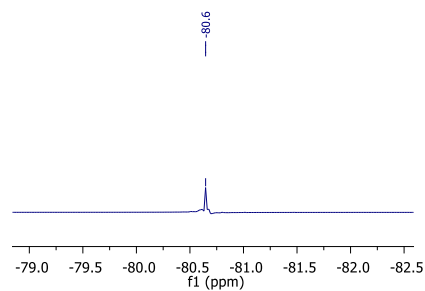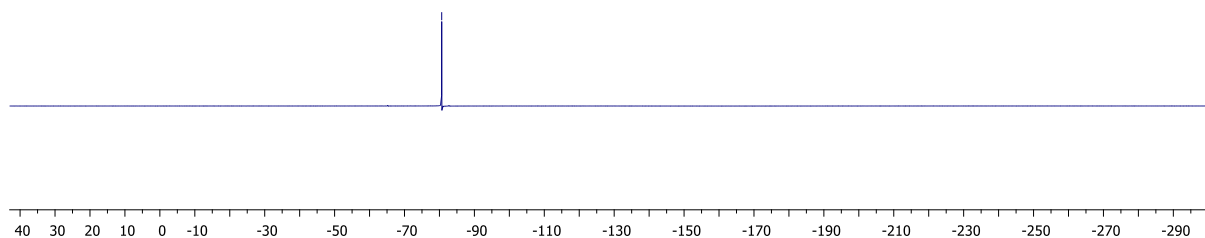

### 3-(4-fluorophenyl)-5-(iodomethyl)-4-methyl-5-(trifluoromethyl)-4,5-dihydro-1,2,4-oxadiazole (14)

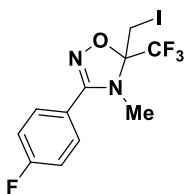

( $^1\text{H}$ -NMR,  $\text{CDCl}_3$ , 600 MHz)

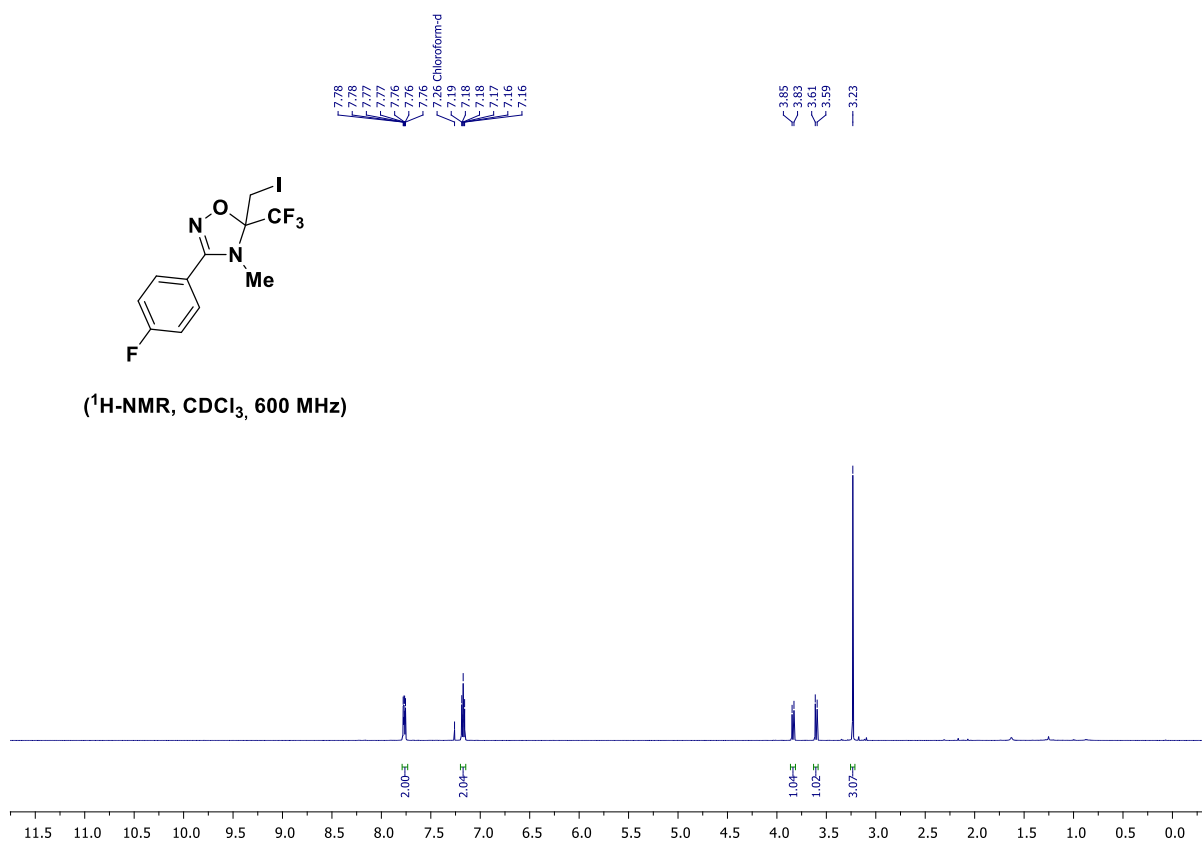



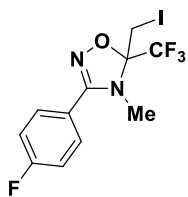

(<sup>13</sup>C-NMR, CDCl<sub>3</sub>, 150 MHz)

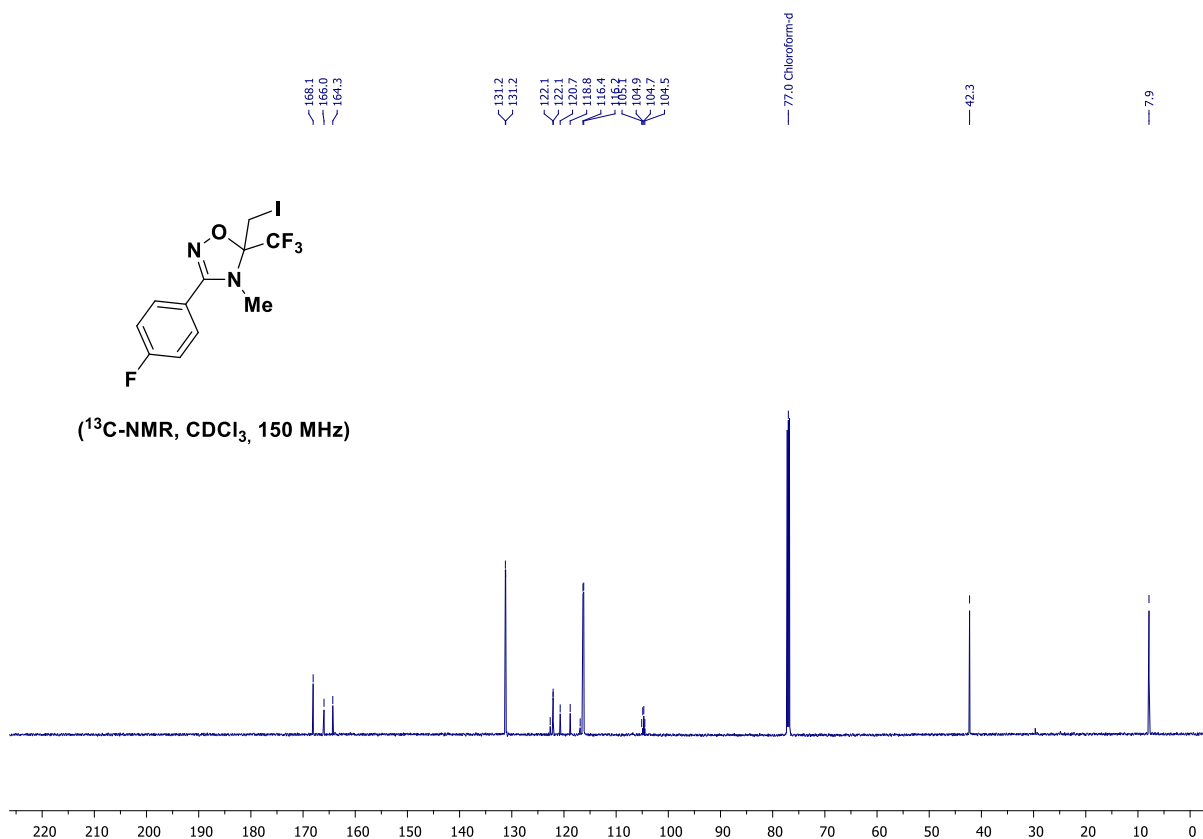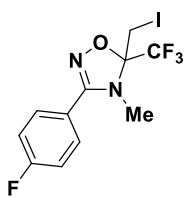

(<sup>19</sup>F-NMR, CDCl<sub>3</sub>, 565 MHz)

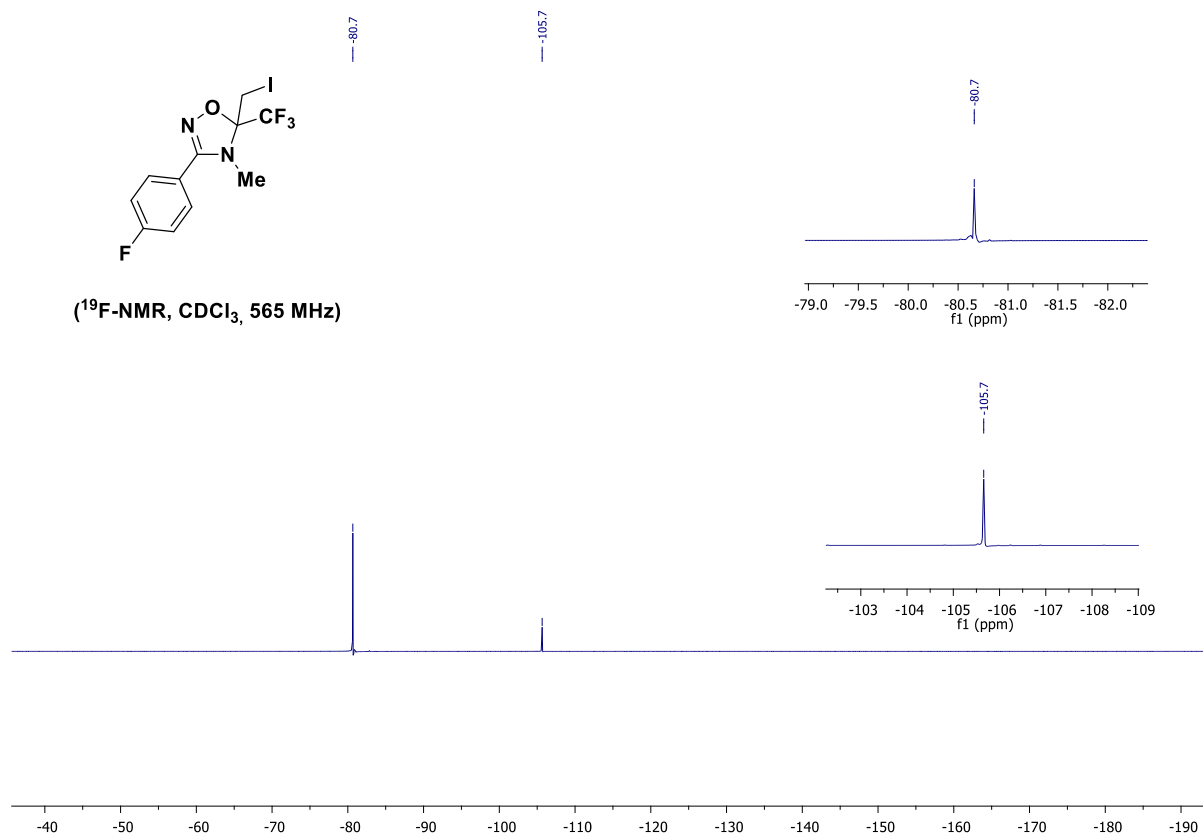



5-(iodomethyl)-4-methyl-3-phenyl-5-(trifluoromethyl)-4,5-dihydro-1,2,4-oxadiazole (15)

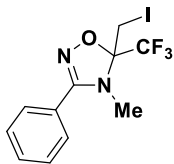

(<sup>1</sup>H-NMR, CDCl<sub>3</sub>, 600 MHz)

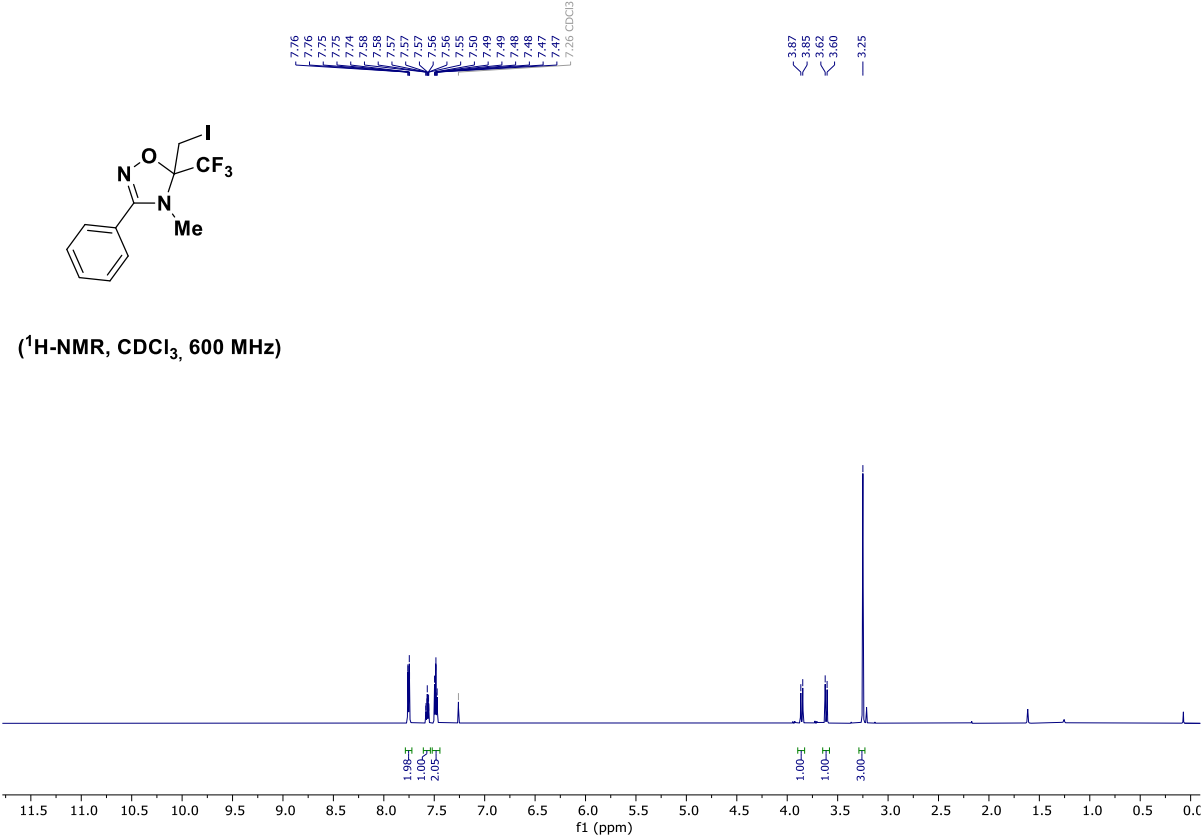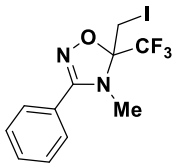

(<sup>13</sup>C-NMR, CDCl<sub>3</sub>, 150 MHz)

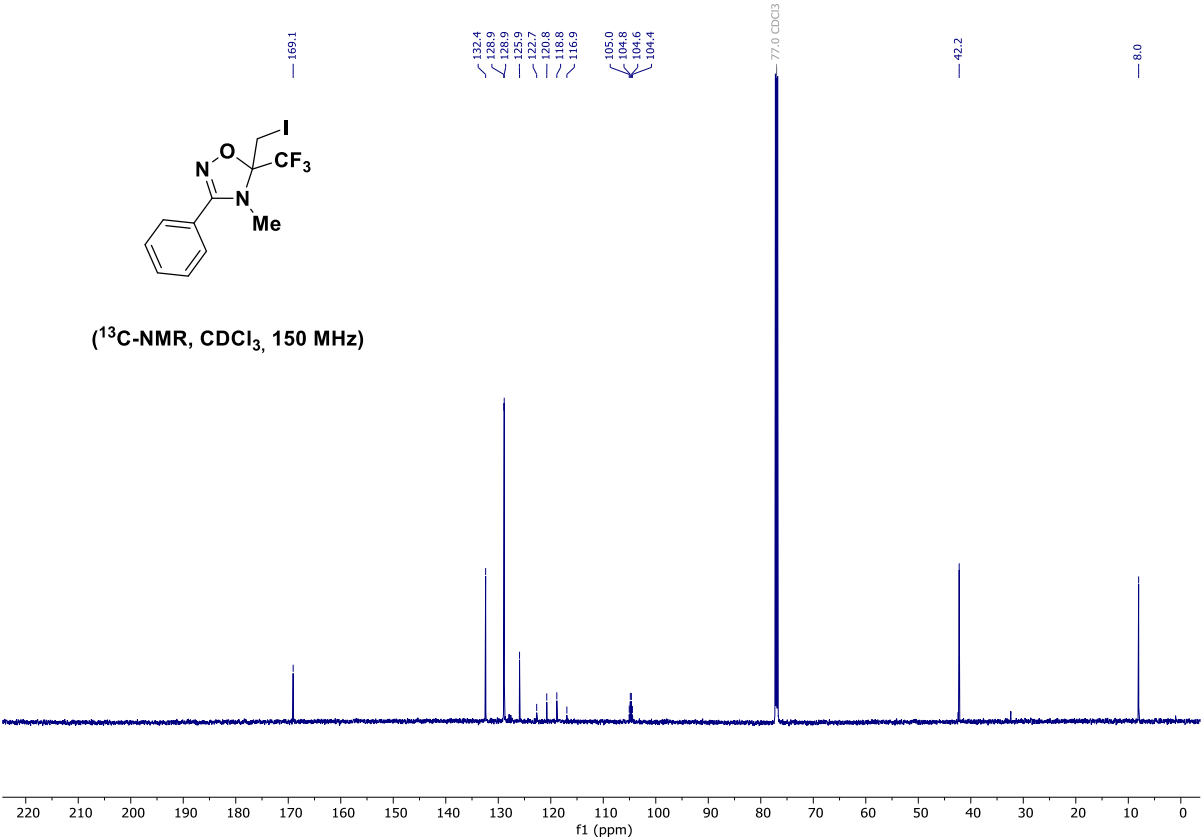



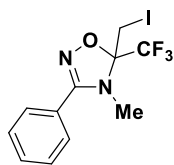

( $^{19}\text{F}$ -NMR,  $\text{CDCl}_3$ , 565 MHz)

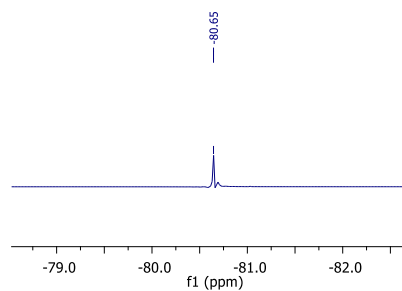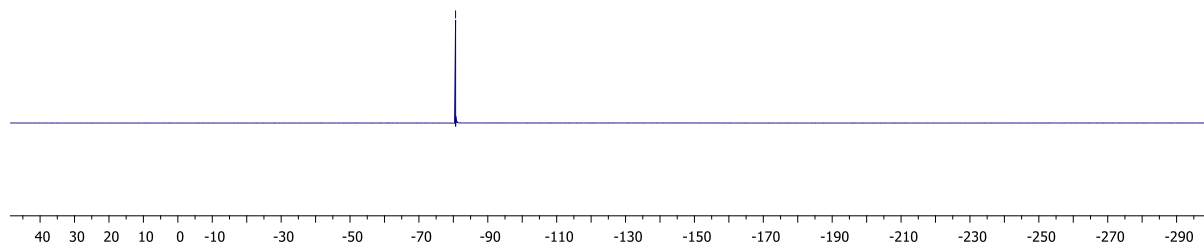

**4-(5-(iodomethyl)-4-methyl-5-(trifluoromethyl)-4,5-dihydro-1,2,4-oxadiazol-3-yl)-*N,N*-dimethylaniline (16)**

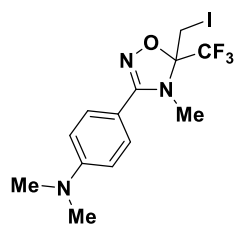

( $^1\text{H}$ -NMR,  $\text{CDCl}_3$ , 600 MHz)

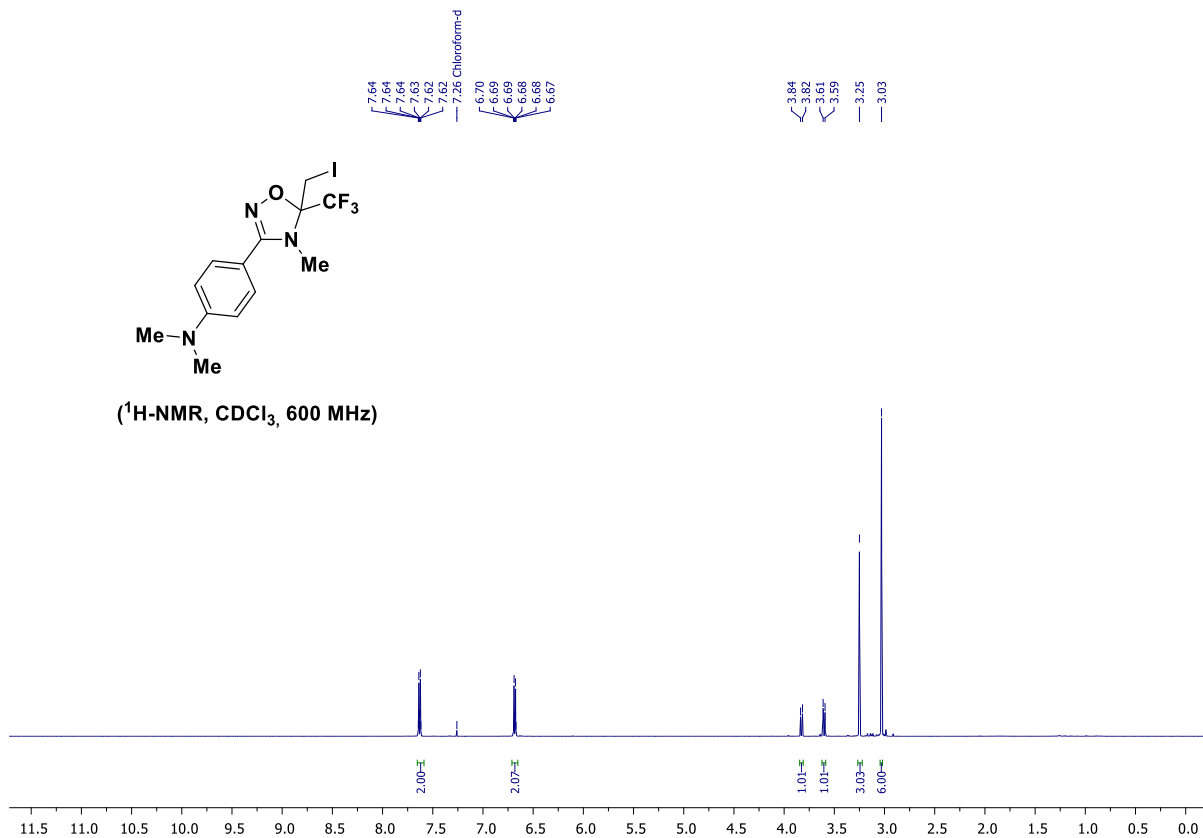



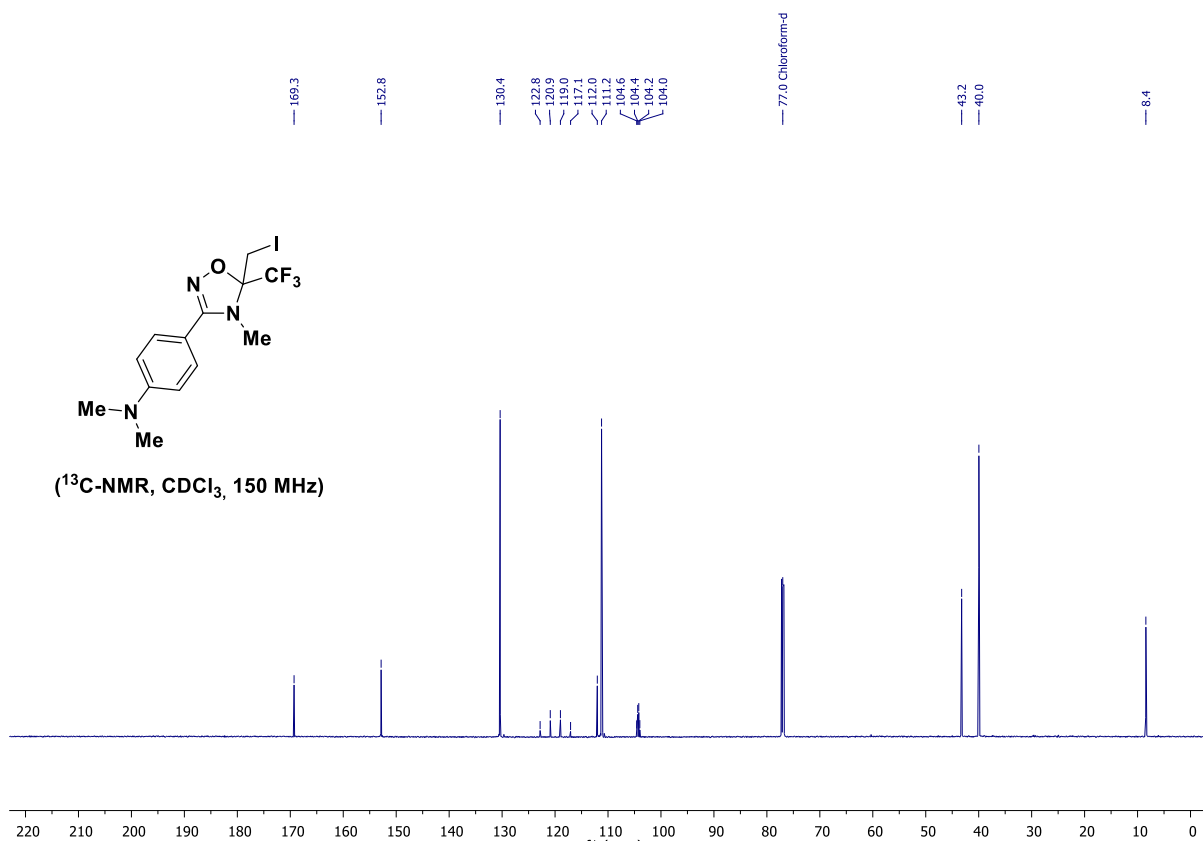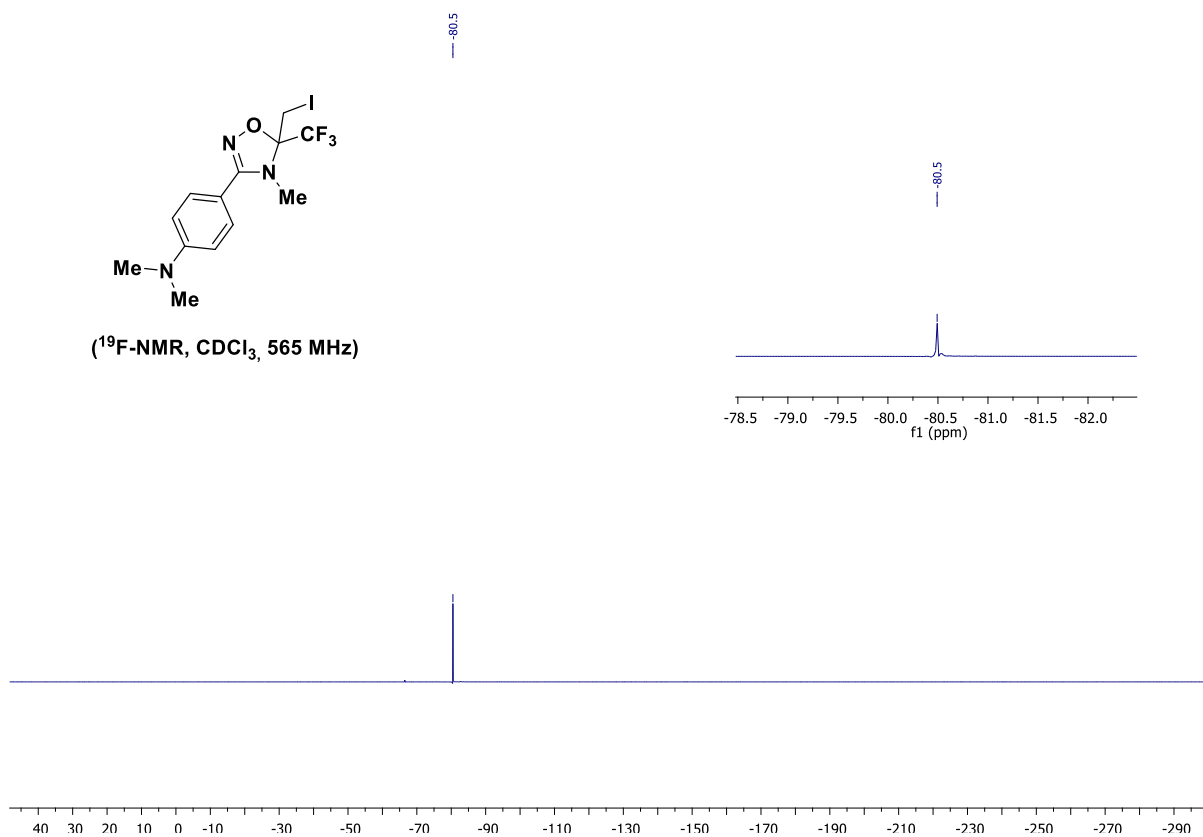



**5-(iodomethyl)-3-(4-methoxyphenyl)-4-methyl-5-(trifluoromethyl)-4,5-dihydro-1,2,4-oxadiazole (17)**

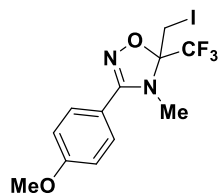

(<sup>1</sup>H-NMR, CDCl<sub>3</sub>, 600 MHz)

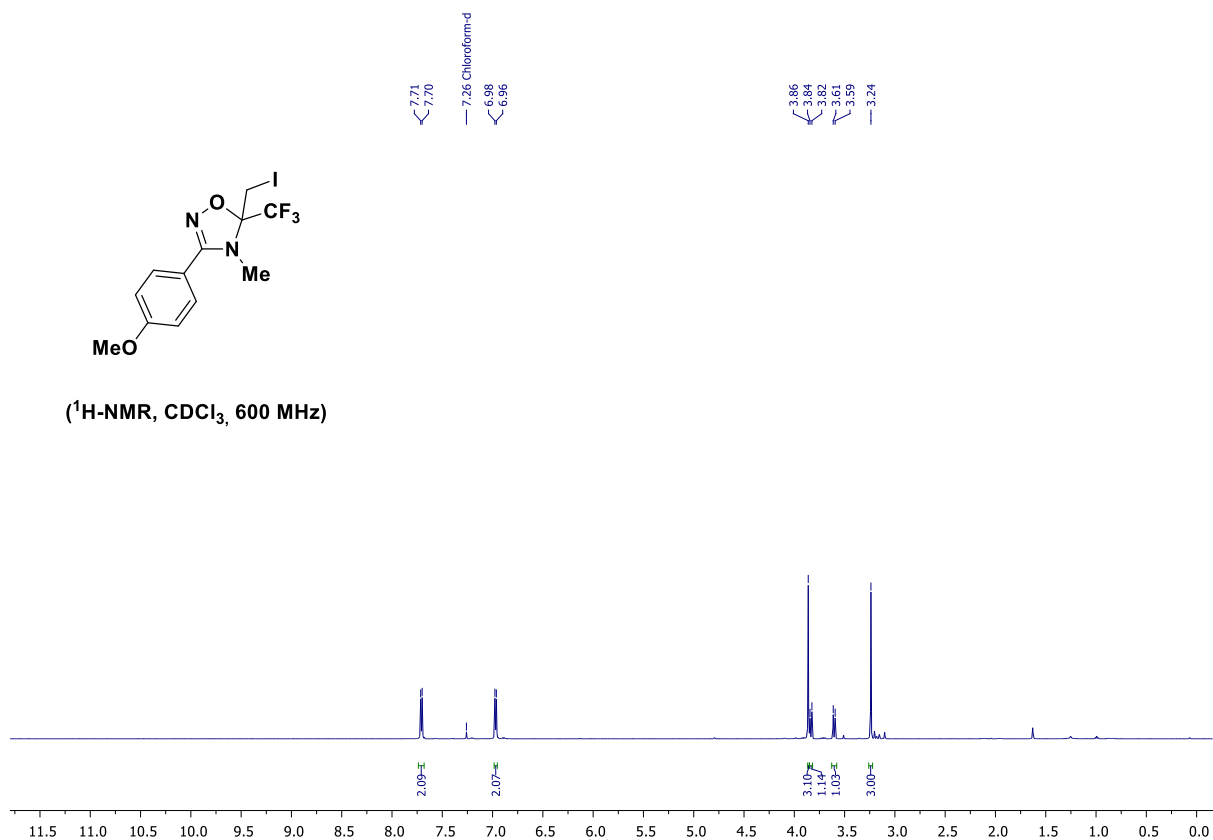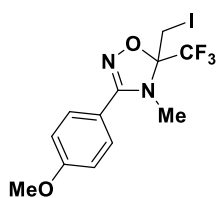

(<sup>13</sup>C-NMR, CDCl<sub>3</sub>, 150 MHz)

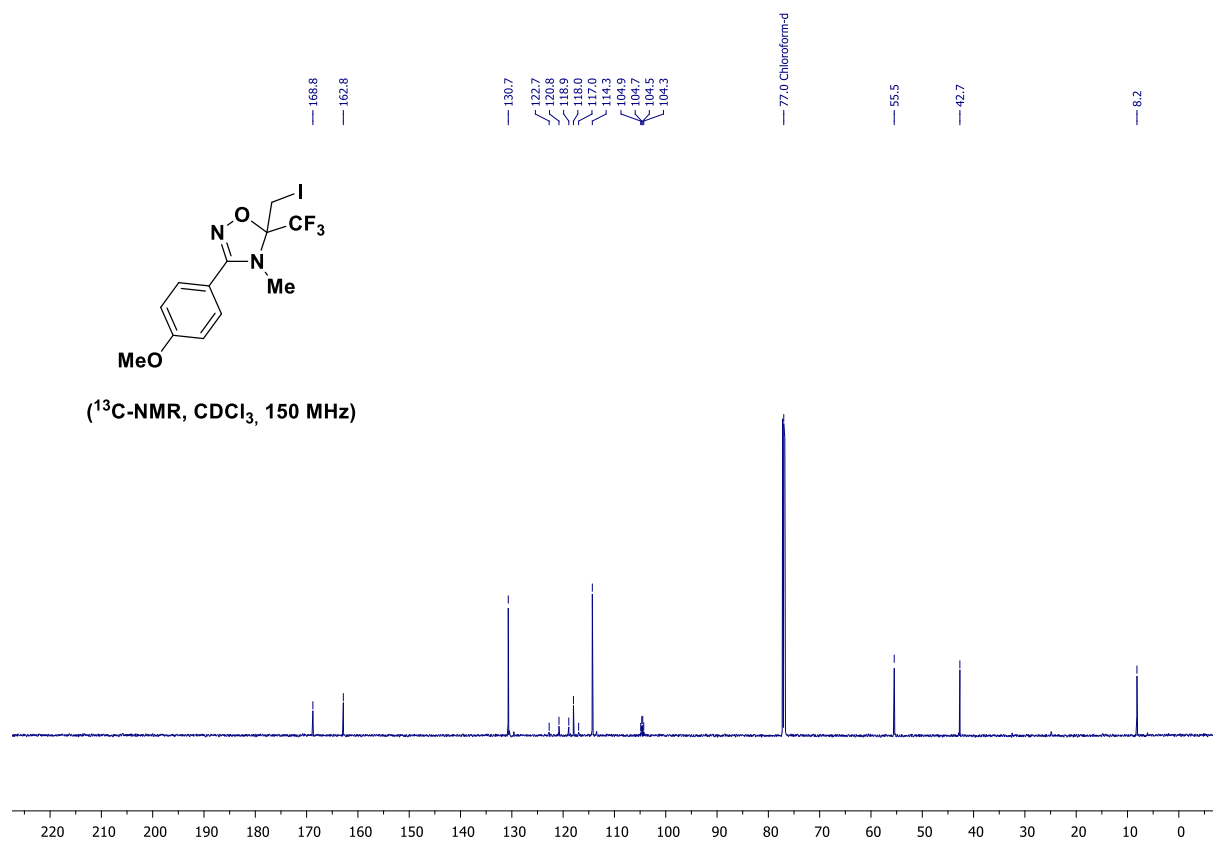



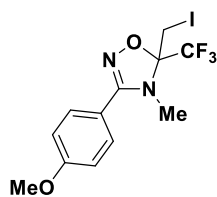

( $^{19}\text{F}$ -NMR,  $\text{CDCl}_3$ , 565 MHz)

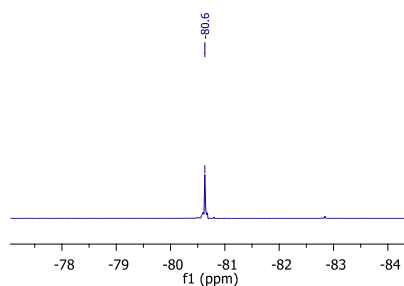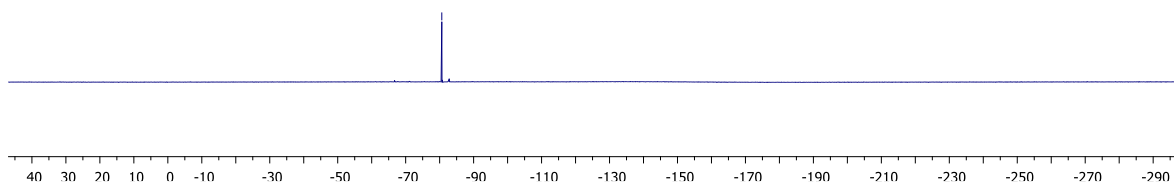

**5-(bromomethyl)-2-methyl-3-(3-methylphenyl)-5-(trifluoromethyl)-2,5-dihydro-1,2,4-oxadiazole (18)**  
**and 5-(bromomethyl)-4-methyl-3-(3-methylphenyl)-5-(trifluoromethyl)-4,5-dihydro-1,2,4-oxadiazole (18a)**

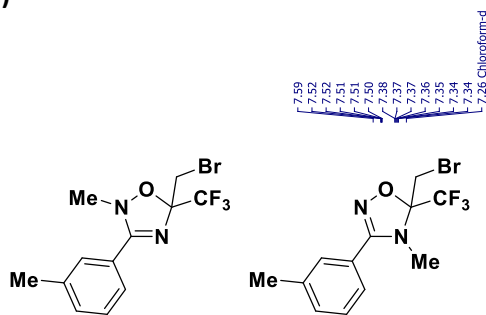

( $^1\text{H}$ -NMR,  $\text{CDCl}_3$ , 600 MHz)

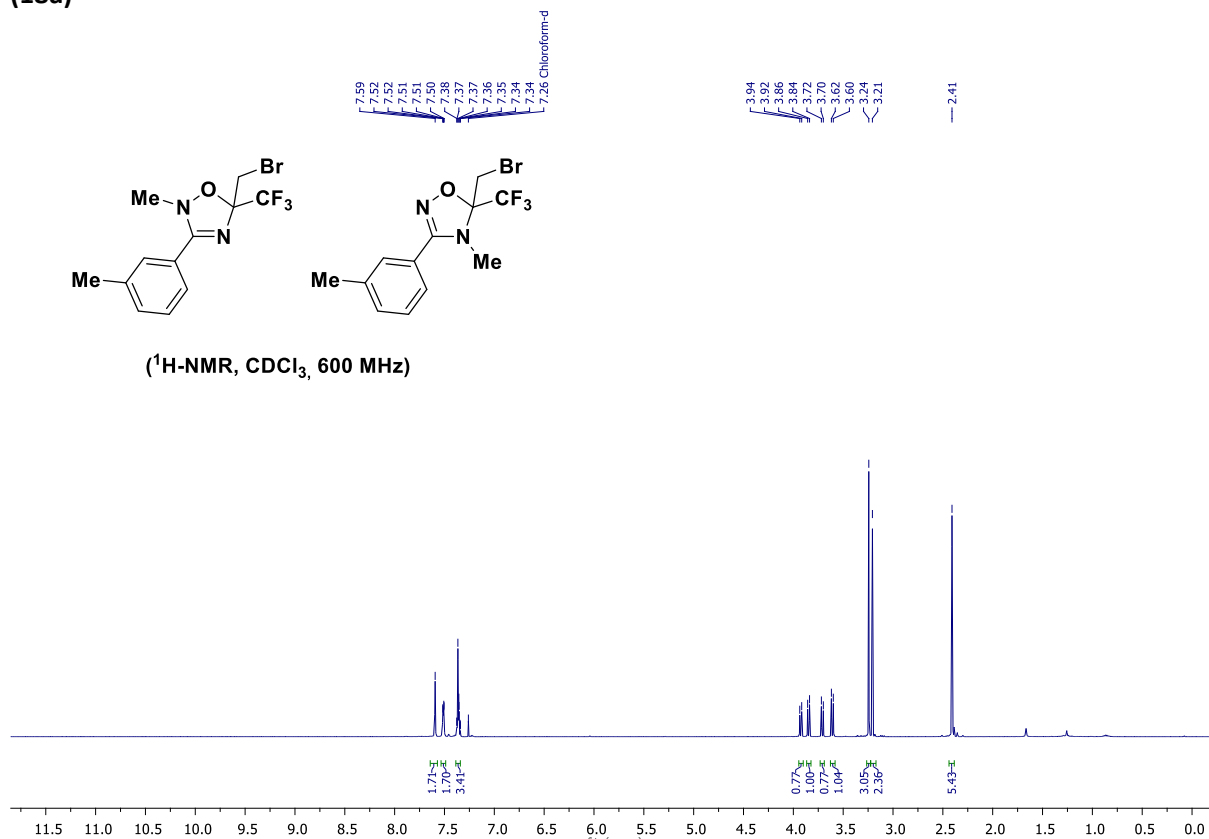



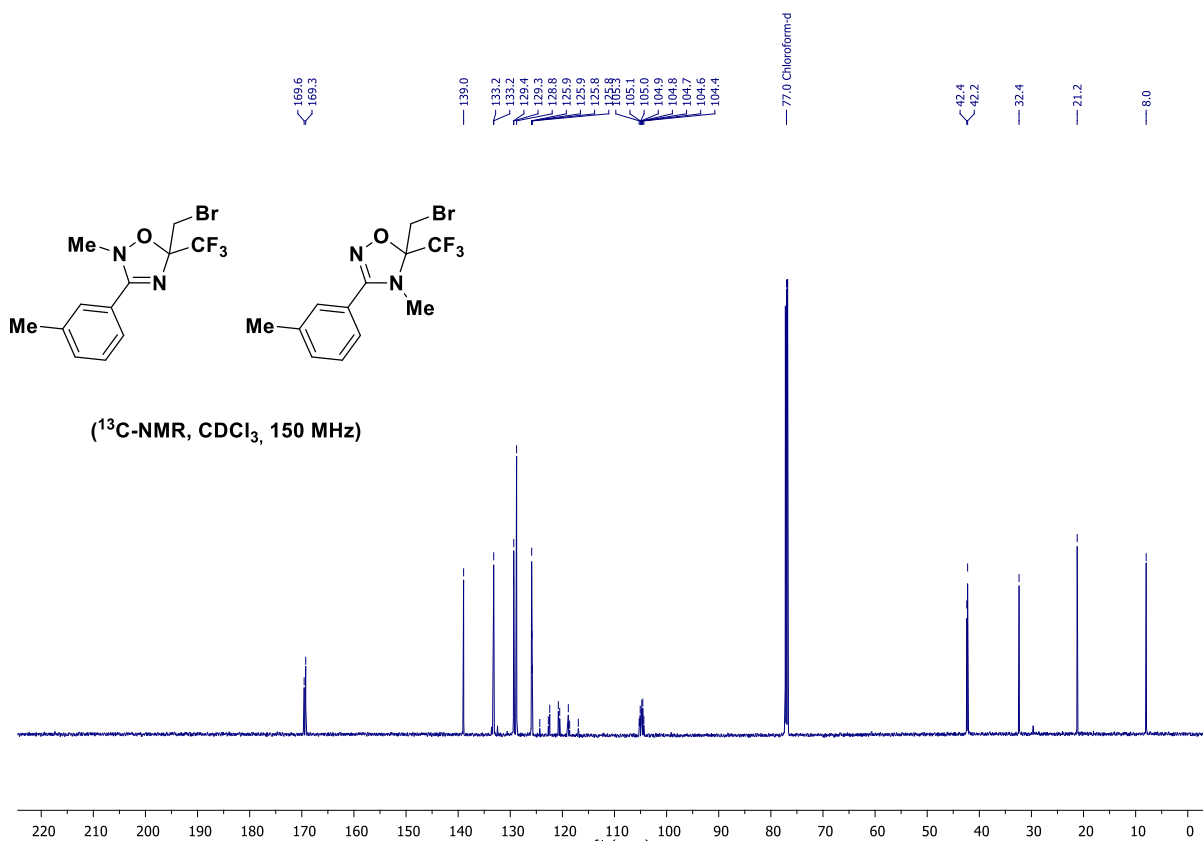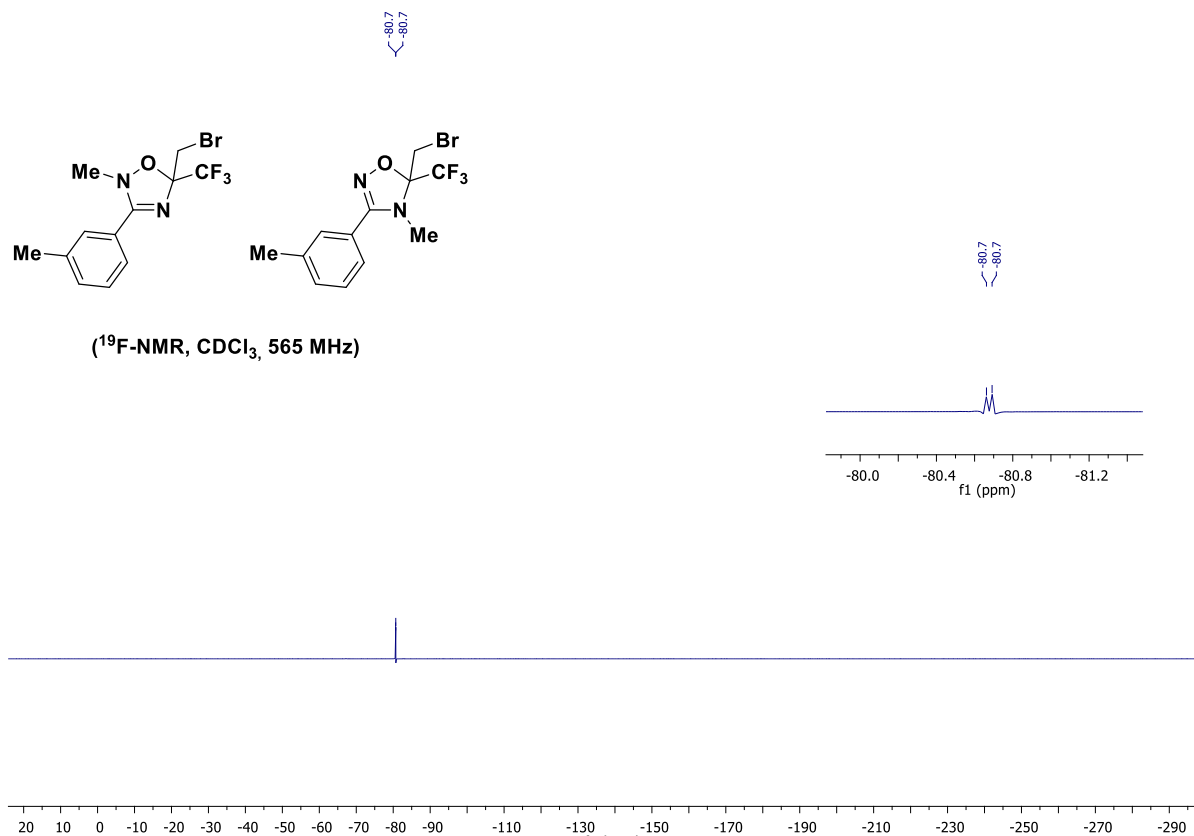



**5-(bromomethyl)-3-(4-chlorophenyl)-2-methyl-5-(trifluoromethyl)-2,5-dihydro-1,2,4-oxadiazole (19) and 5-(bromomethyl)-3-(4-chlorophenyl)-4-methyl-5-(trifluoromethyl)-4,5-dihydro-1,2,4-oxadiazole (19a)**

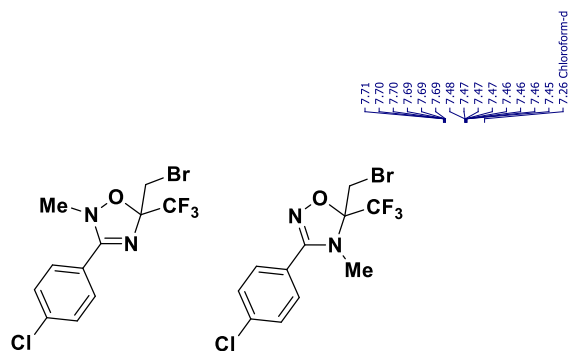

( $^1\text{H-NMR}$ ,  $\text{CDCl}_3$ , 600 MHz)

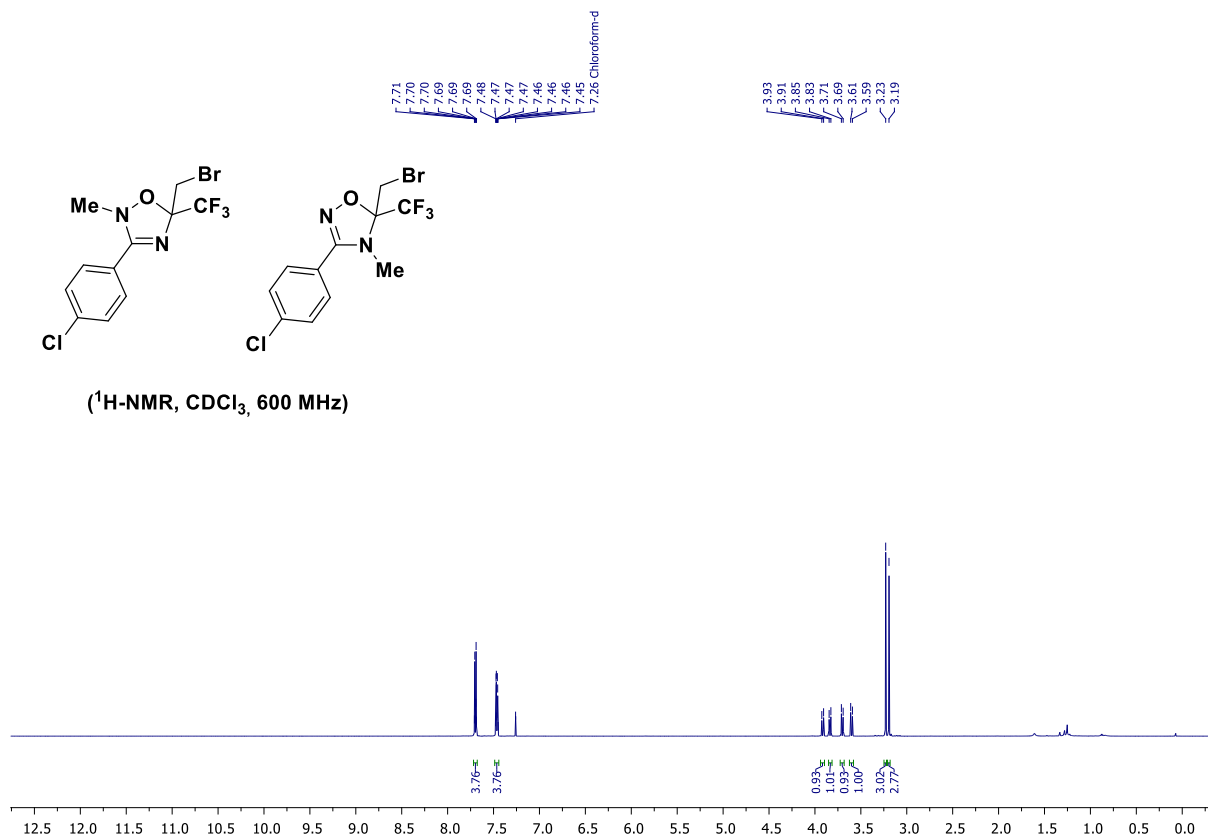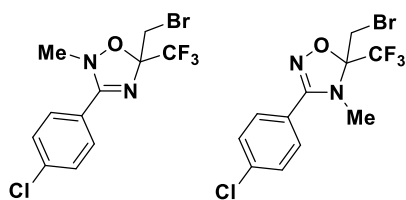

( $^{13}\text{C-NMR}$ ,  $\text{CDCl}_3$ , 150 MHz)

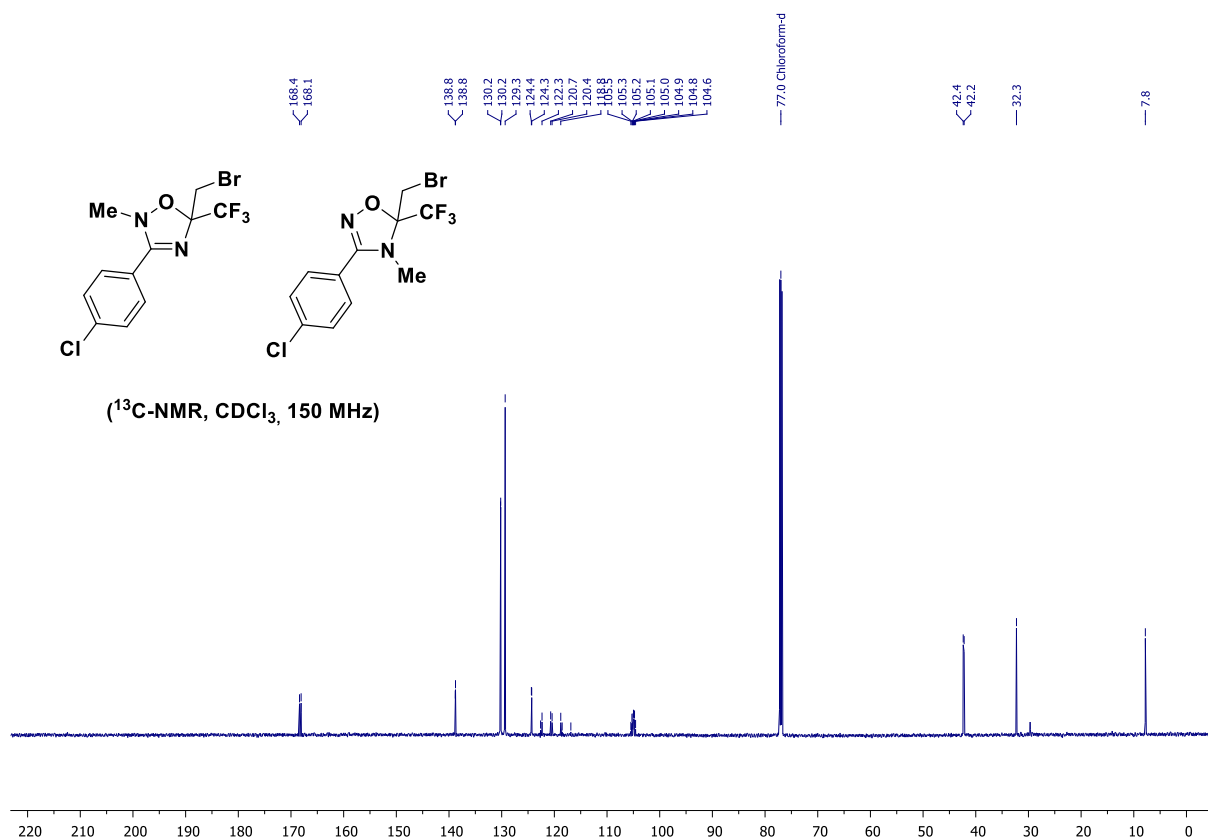



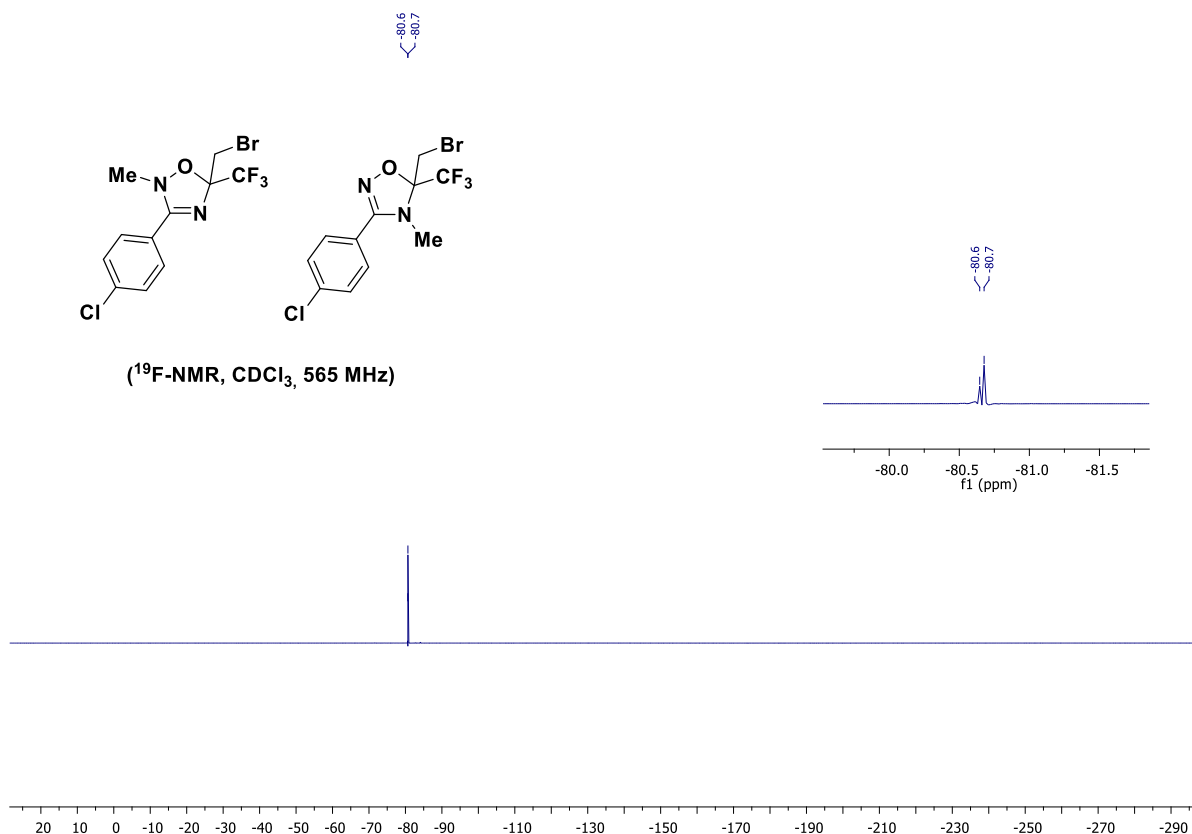

**4-(5-(bromomethyl)-2-methyl-5-(trifluoromethyl)-2,5-dihydro-1,2,4-oxadiazol-3-yl)benzonitrile (20) and 4-(5-(bromomethyl)-4-methyl-5-(trifluoromethyl)-4,5-dihydro-1,2,4-oxadiazol-3-yl)benzonitrile (20a)**

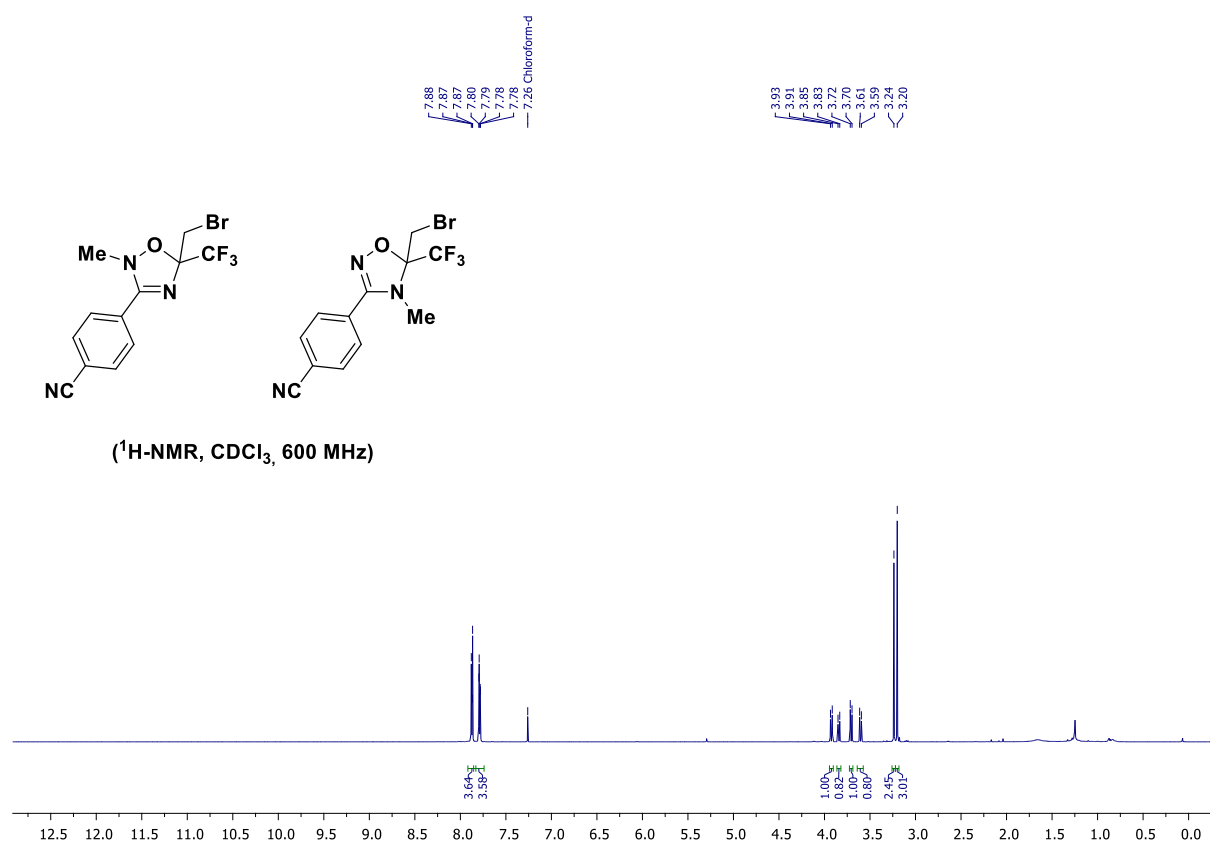



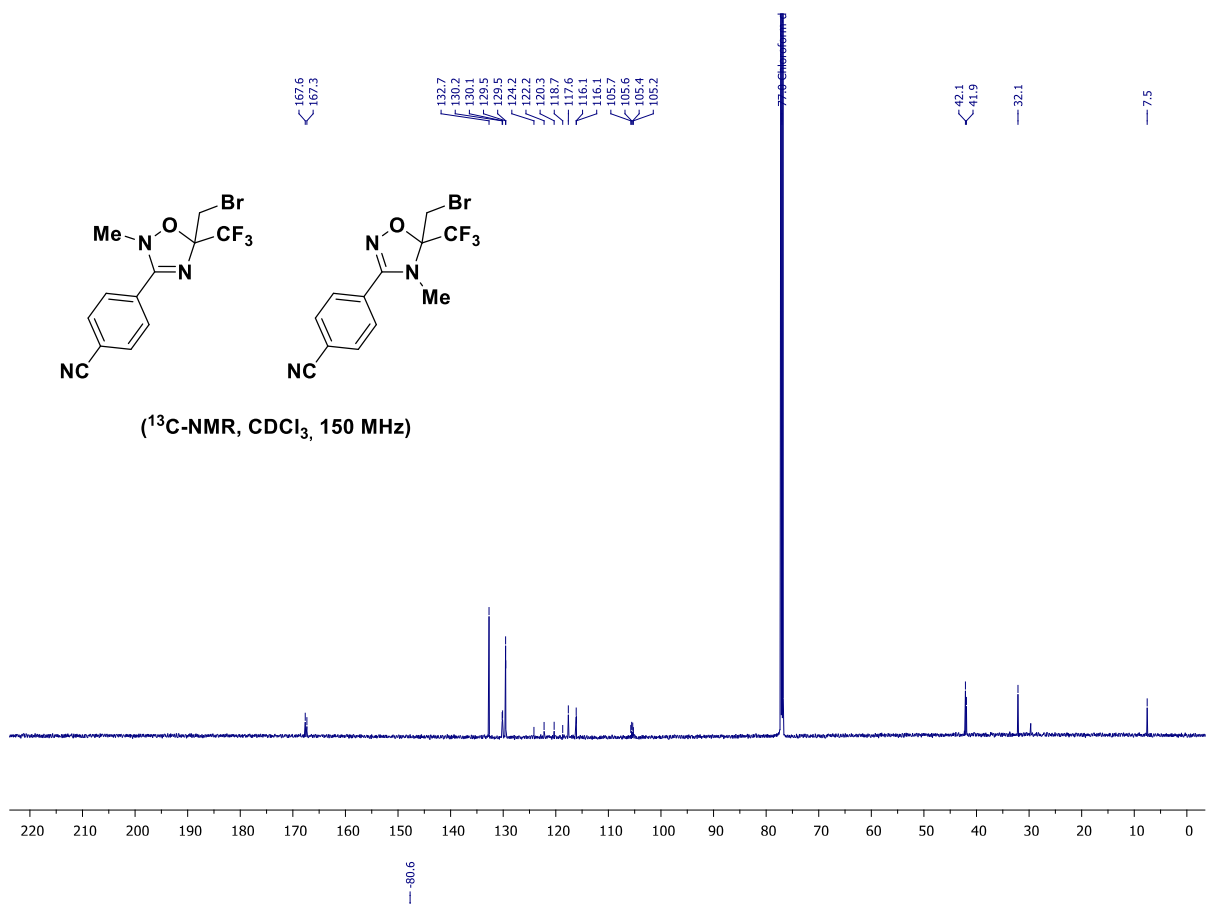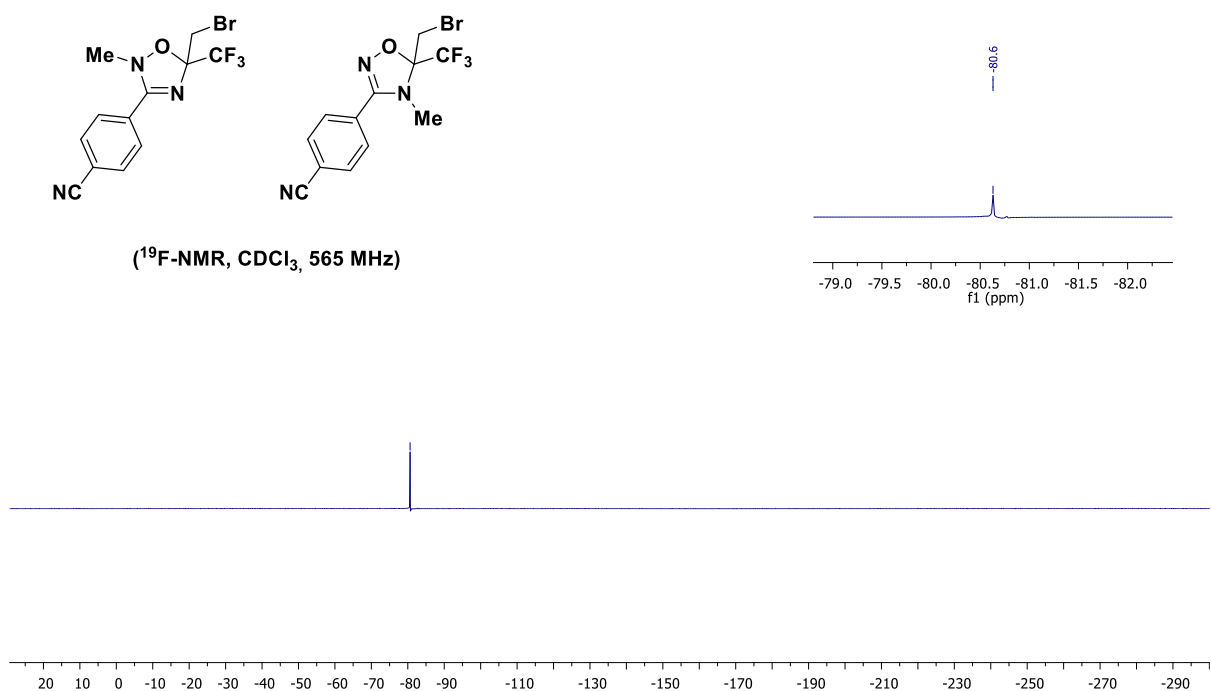



The image displays two chemical structures, labeled 1 and 2, which are isomers of a 1,2,3,4-tetrahydroisoxazole derivative. Both structures feature a 4-nitrophenyl group attached to the 2-position of a 1,2,3,4-tetrahydroisoxazole ring. The 1-position of the isoxazole ring is substituted with a 2-bromo-2-(trifluoromethyl)ethyl group. In structure 1, the isoxazole ring is in a 1,2-dihydro configuration, with a methyl group (Me) attached to the nitrogen atom and a trifluoromethyl group (CF<sub>3</sub>) attached to the carbon atom adjacent to the nitrogen. In structure 2, the isoxazole ring is in a 1,3-dihydro configuration, with a methyl group (Me) attached to the carbon atom adjacent to the nitrogen and a trifluoromethyl group (CF<sub>3</sub>) attached to the nitrogen atom. The bromine atom (Br) is attached to the carbon atom adjacent to the nitrogen in both structures.

Figure 1 consists of two bar charts. The left chart shows the distribution of chloroform in the atmosphere (Y-axis: 0 to 100) versus Chloroform (X-axis: 0 to 100). The right chart shows the distribution of chloroform in the atmosphere (Y-axis: 0 to 100) versus Chloroform (X-axis: 0 to 100). Both charts show a peak at 100% chloroform.

| Chloroform (%) | Distribution (%) |
|----------------|------------------|
| 8.36           | 8.36             |
| 8.35           | 8.35             |
| 8.34           | 8.34             |
| 8.33           | 8.33             |
| 7.96           | 7.96             |
| 7.95           | 7.95             |
| 7.94           | 7.94             |
| 7.93           | 7.93             |
| 7.92           | 7.92             |
| 7.91           | 7.91             |
| 7.90           | 7.90             |
| 7.89           | 7.89             |
| 7.88           | 7.88             |
| 7.87           | 7.87             |
| 7.86           | 7.86             |
| 7.85           | 7.85             |
| 7.84           | 7.84             |
| 7.83           | 7.83             |
| 7.82           | 7.82             |
| 7.81           | 7.81             |
| 7.80           | 7.80             |
| 7.79           | 7.79             |
| 7.78           | 7.78             |
| 7.77           | 7.77             |
| 7.76           | 7.76             |
| 7.75           | 7.75             |
| 7.74           | 7.74             |
| 7.73           | 7.73             |
| 7.72           | 7.72             |
| 7.71           | 7.71             |
| 7.70           | 7.70             |
| 7.69           | 7.69             |
| 7.68           | 7.68             |
| 7.67           | 7.67             |
| 7.66           | 7.66             |
| 7.65           | 7.65             |
| 7.64           | 7.64             |
| 7.63           | 7.63             |
| 7.62           | 7.62             |
| 7.61           | 7.61             |
| 7.60           | 7.60             |
| 7.59           | 7.59             |
| 7.58           | 7.58             |
| 7.57           | 7.57             |
| 7.56           | 7.56             |
| 7.55           | 7.55             |
| 7.54           | 7.54             |
| 7.53           | 7.53             |
| 7.52           | 7.52             |
| 7.51           | 7.51             |
| 7.50           | 7.50             |
| 7.49           | 7.49             |
| 7.48           | 7.48             |
| 7.47           | 7.47             |
| 7.46           | 7.46             |
| 7.45           | 7.45             |
| 7.44           | 7.44             |
| 7.43           | 7.43             |
| 7.42           | 7.42             |
| 7.41           | 7.41             |
| 7.40           | 7.40             |
| 7.39           | 7.39             |
| 7.38           | 7.38             |
| 7.37           | 7.37             |
| 7.36           | 7.36             |
| 7.35           | 7.35             |
| 7.34           | 7.34             |
| 7.33           | 7.33             |
| 7.32           | 7.32             |
| 7.31           | 7.31             |
| 7.30           | 7.30             |
| 7.29           | 7.29             |
| 7.28           | 7.28             |
| 7.27           | 7.27             |
| 7.26           | 7.26             |
| 7.25           | 7.25             |
| 7.24           | 7.24             |
| 7.23           | 7.23             |
| 7.22           | 7.22             |
| 7.21           | 7.21             |
| 7.20           | 7.20             |
| 7.19           | 7.19             |
| 7.18           | 7.18             |
| 7.17           | 7.17             |
| 7.16           | 7.16             |
| 7.15           | 7.15             |
| 7.14           | 7.14             |
| 7.13           | 7.13             |
| 7.12           | 7.12             |
| 7.11           | 7.11             |
| 7.10           | 7.10             |
| 7.09           | 7.09             |
| 7.08           | 7.08             |
| 7.07           | 7.07             |
| 7.06           | 7.06             |
| 7.05           | 7.05             |
| 7.04           | 7.04             |
| 7.03           | 7.03             |
| 7.02           | 7.02             |
| 7.01           | 7.01             |
| 7.00           | 7.00             |
| 6.99           | 6.99             |
| 6.98           | 6.98             |
| 6.97           | 6.97             |
| 6.96           | 6.96             |
| 6.95           | 6.95             |
| 6.94           | 6.94             |
| 6.93           | 6.93             |
| 6.92           | 6.92             |
| 6.91           | 6.91             |
| 6.90           | 6.90             |
| 6.89           | 6.89             |
| 6.88           | 6.88             |
| 6.87           | 6.87             |
| 6.86           | 6.86             |
| 6.85           | 6.85             |
| 6.84           | 6.84             |
| 6.83           | 6.83             |
| 6.82           | 6.82             |
| 6.81           | 6.81             |
| 6.80           | 6.80             |
| 6.79           | 6.79             |
| 6.78           | 6.78             |
| 6.77           | 6.77             |
| 6.76           | 6.76             |
| 6.75           | 6.75             |
| 6.74           | 6.74             |
| 6.73           | 6.73             |
| 6.72           | 6.72             |
| 6.71           | 6.71             |
| 6.70           | 6.70             |
| 6.69           | 6.69             |
| 6.68           | 6.68             |
| 6.67           | 6.67             |
| 6.66           | 6.66             |
| 6.65           | 6.65             |
| 6.64           | 6.64             |
| 6.63           | 6.63             |
| 6.62           | 6.62             |
| 6.61           | 6.61             |
| 6.60           | 6.60             |
| 6.59           | 6.59             |
| 6.58           | 6.58             |
| 6.57           | 6.57             |
| 6.56           | 6.56             |
| 6.55           | 6.55             |
| 6.54           | 6.54             |
| 6.53           | 6.53             |
| 6.52           | 6.52             |
| 6.51           | 6.51             |
| 6.50           | 6.50             |
| 6.49           | 6.49             |
| 6.48           | 6.48             |
| 6.47           | 6.47             |
| 6.46           | 6.46             |
| 6.45           | 6.45             |
| 6.44           | 6.44             |
| 6.43           | 6.43             |
| 6.42           | 6.42             |
| 6.41           | 6.41             |
| 6.40           | 6.40             |
| 6.39           | 6.39             |
| 6.38           | 6.38             |
| 6.37           | 6.37             |
| 6.36           | 6.36             |
| 6.35           | 6                |

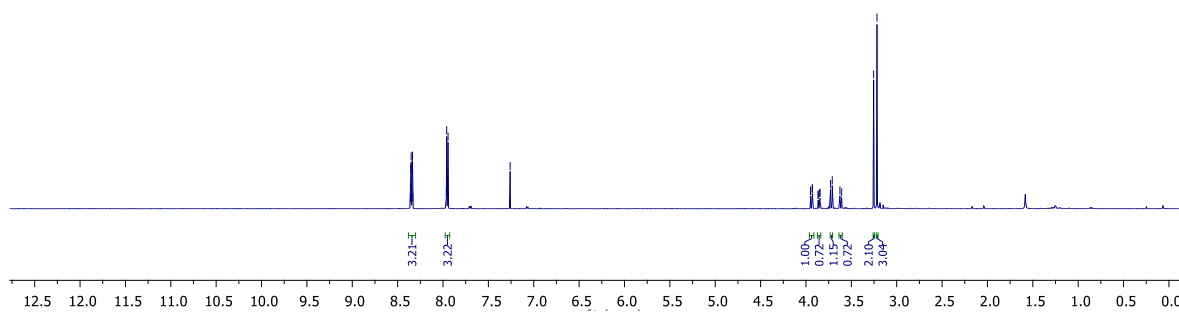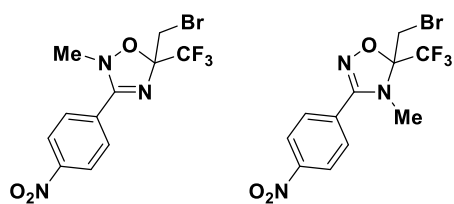

167.4  
167.0  
150.1  
131.8  
131.8  
130.1  
130.0  
124.1  
122.2  
120.6  
120.3  
108.7  
105.8  
105.6  
105.4  
105.4  
105.2  
104.9  
77.8 CH<sub>3</sub>  
42.1  
41.9  
32.1  
7.5

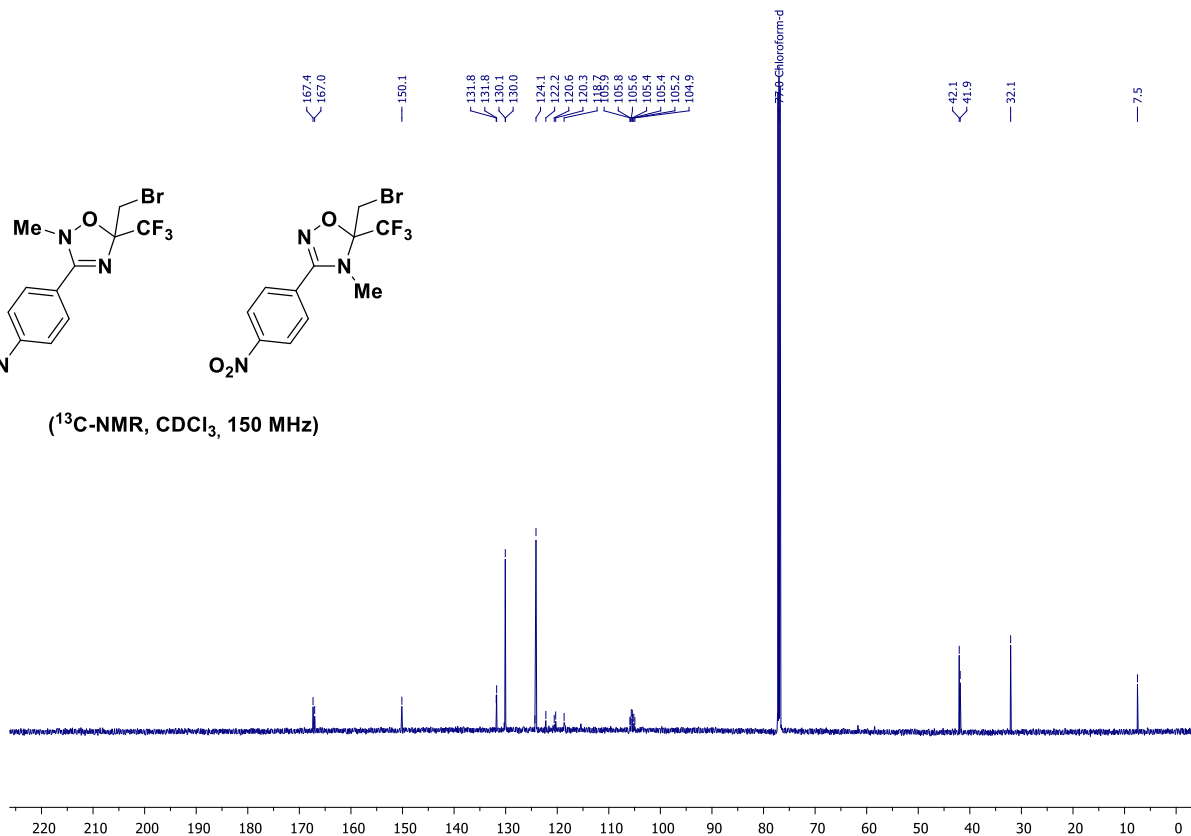



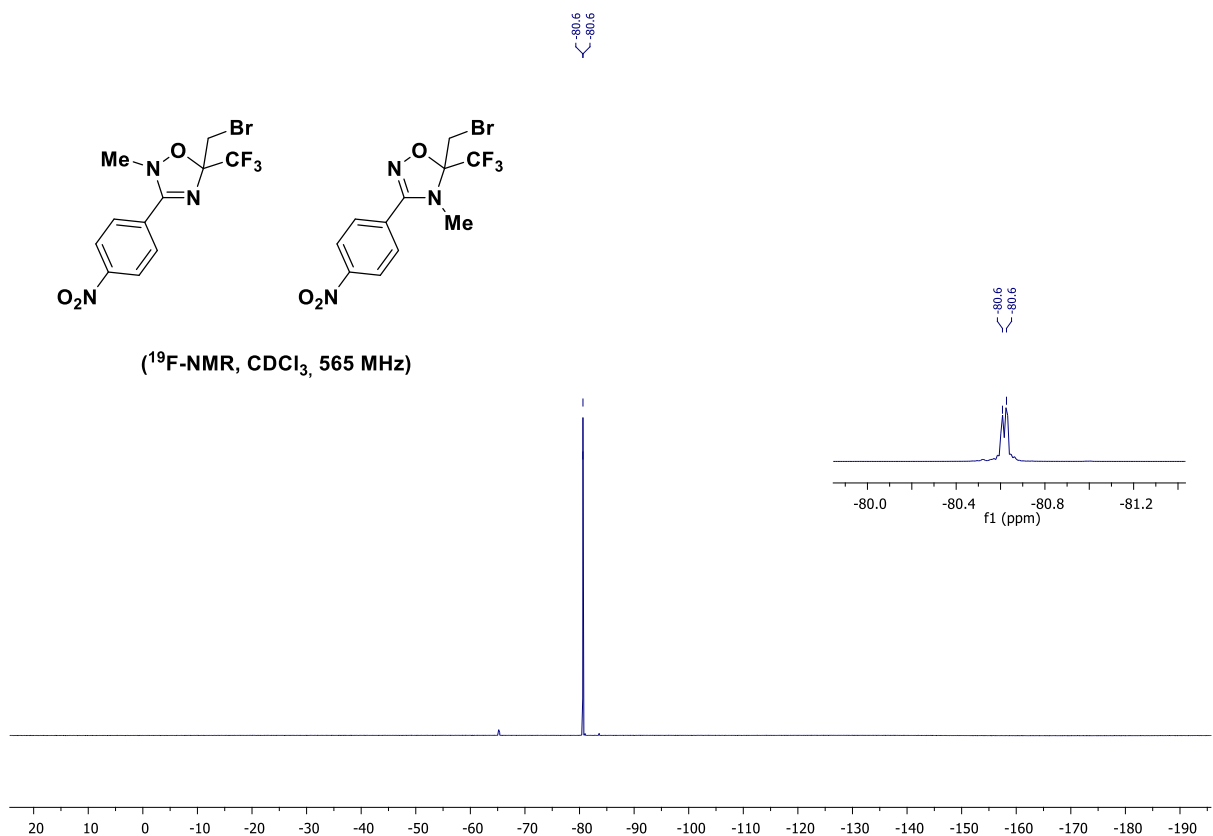

5-(bromomethyl)-2-methyl-3-(pyridin-2-yl)-5-(trifluoromethyl)-2,5-dihydro-1,2,4-oxadiazole (22) and 5-(bromomethyl)-4-methyl-3-(pyridin-2-yl)-5-(trifluoromethyl)-4,5-dihydro-1,2,4-oxadiazole (22a)

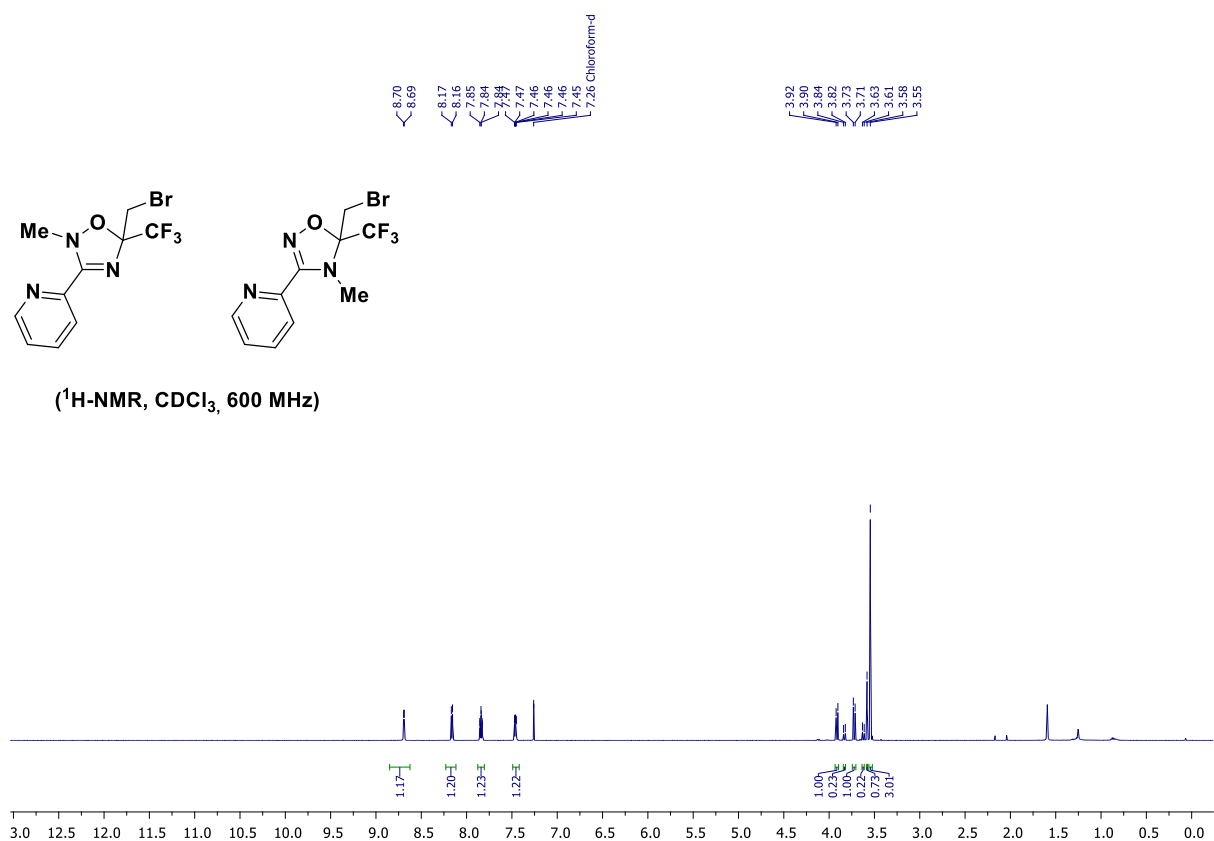



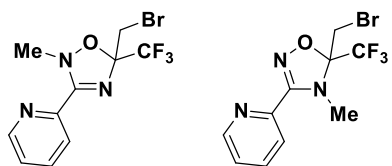

( $^{13}\text{C}$ -NMR,  $\text{CDCl}_3$ , 150 MHz)

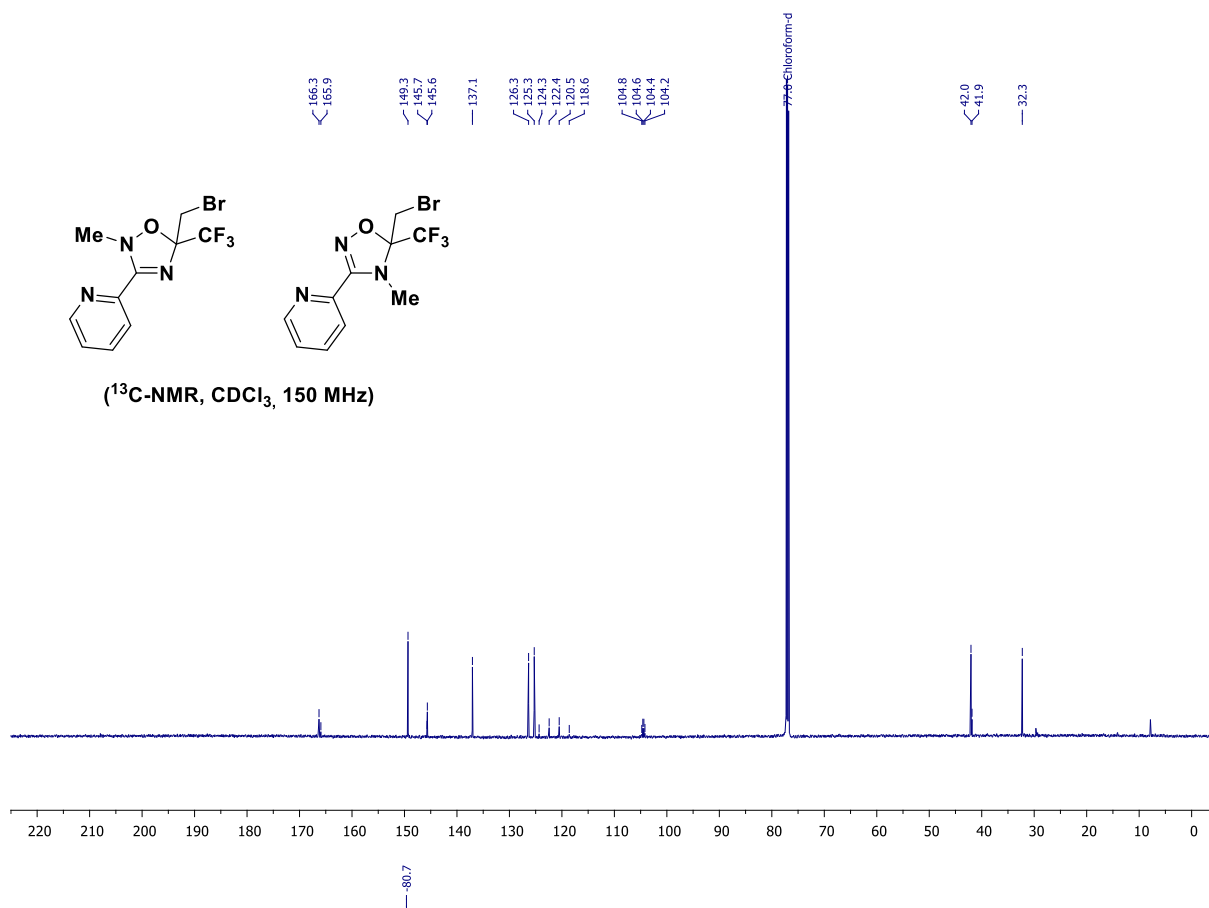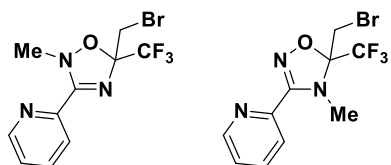

( $^{19}\text{F}$ -NMR,  $\text{CDCl}_3$ , 565 MHz)

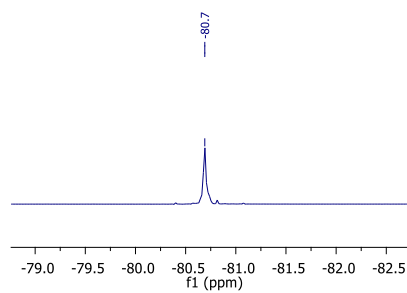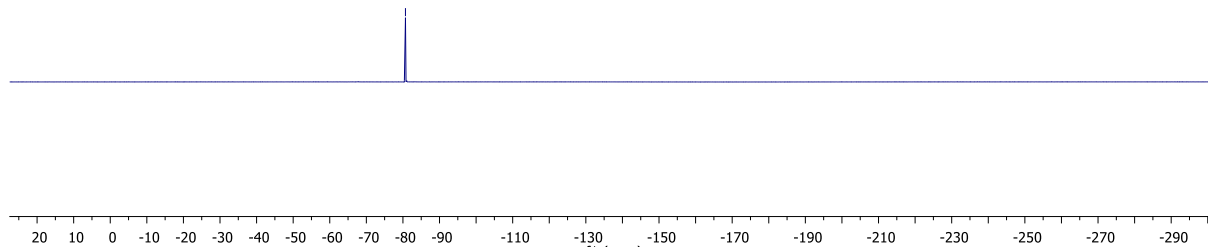



**5-(bromomethyl)-2-methyl-3-(thiophen-2-yl)-5-(trifluoromethyl)-2,5-dihydro-1,2,4-oxadiazole (23) and 5-(bromomethyl)-4-methyl-3-(thiophen-2-yl)-5-(trifluoromethyl)-4,5-dihydro-1,2,4-oxadiazole (23a)**

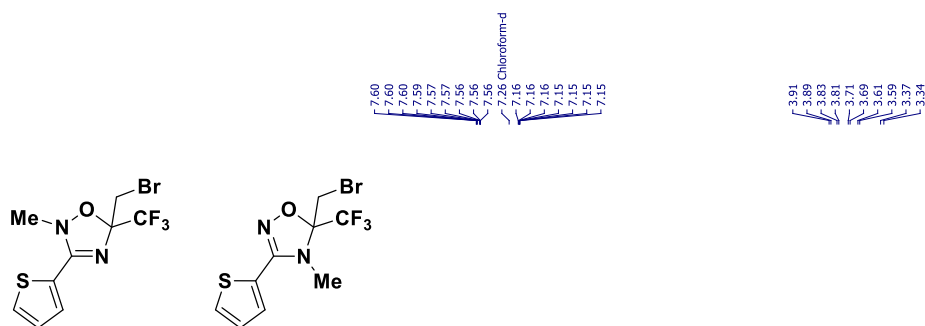

(<sup>1</sup>H-NMR, CDCl<sub>3</sub>, 600 MHz)

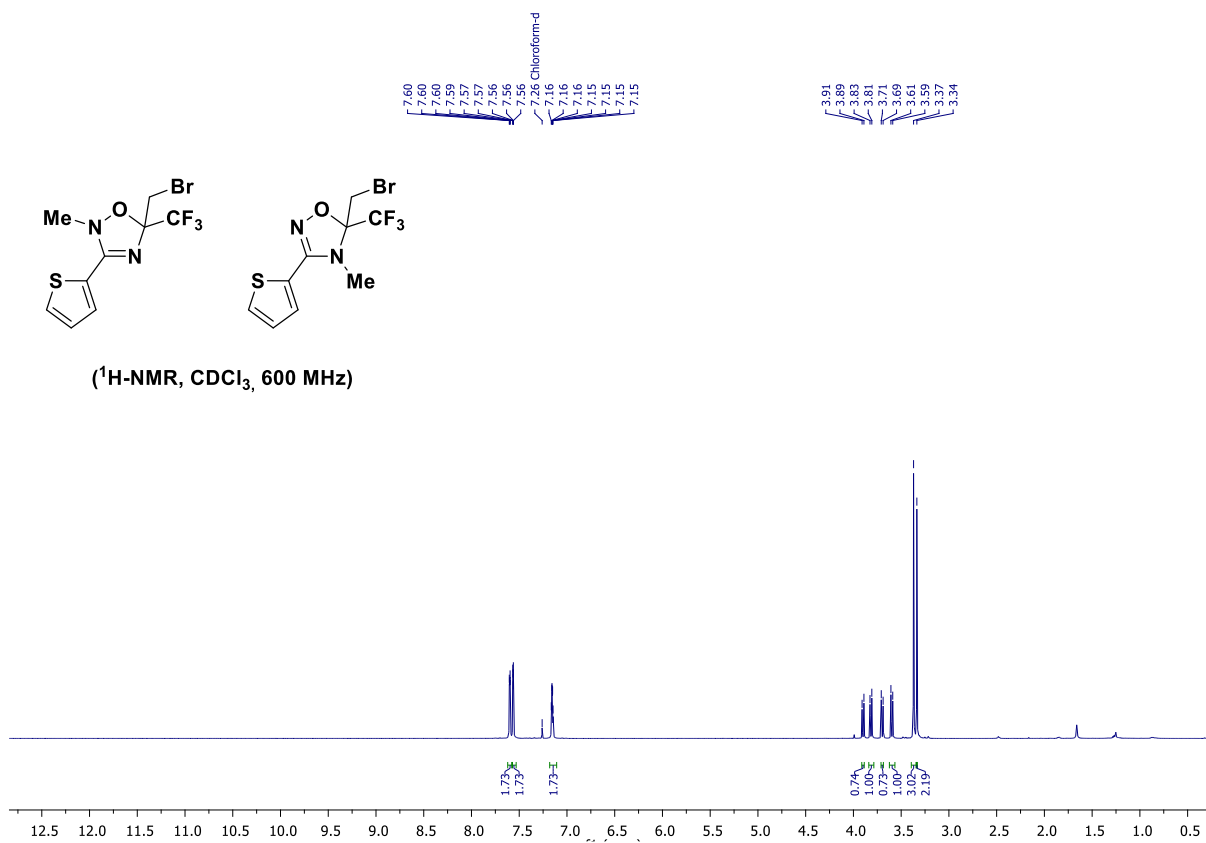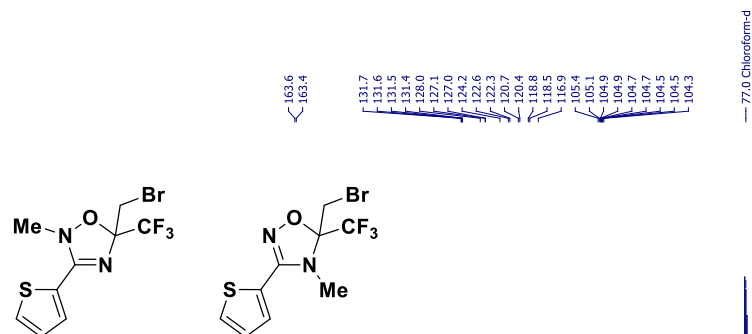

(<sup>13</sup>C-NMR, CDCl<sub>3</sub>, 150 MHz)

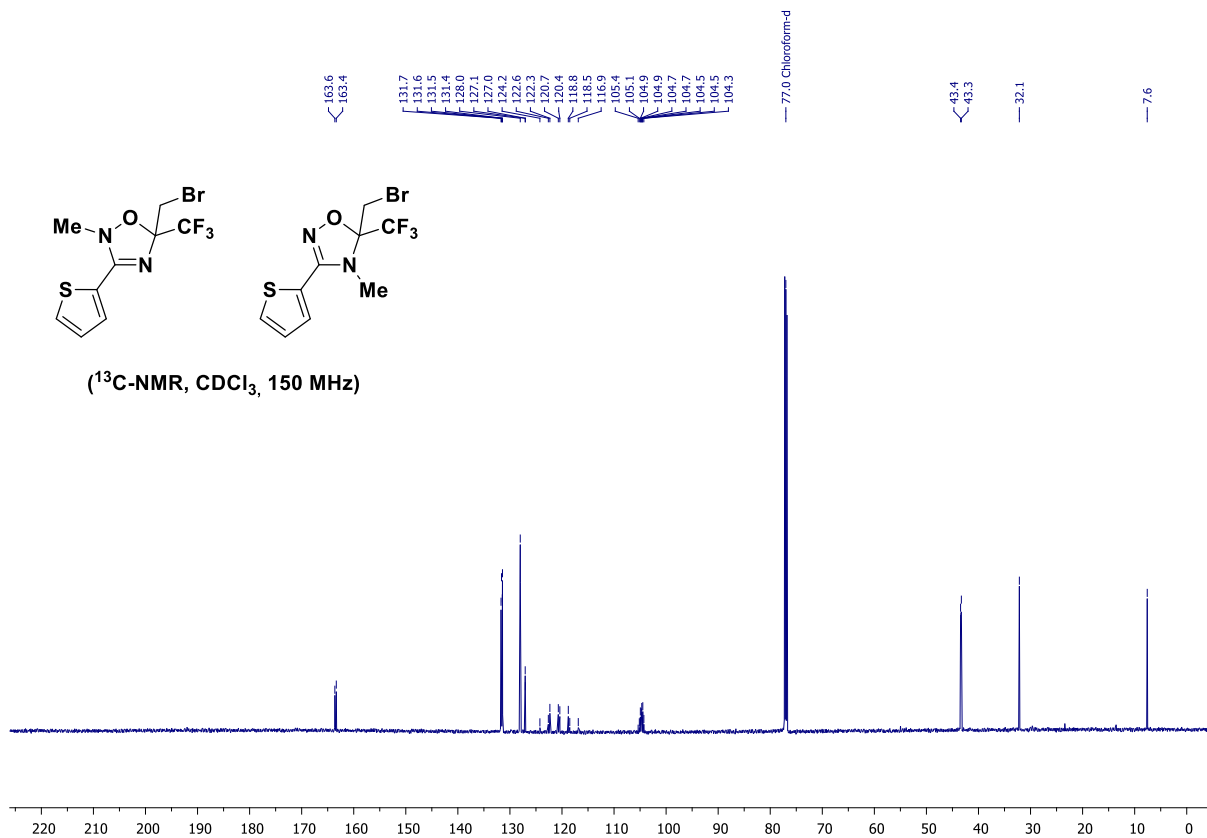



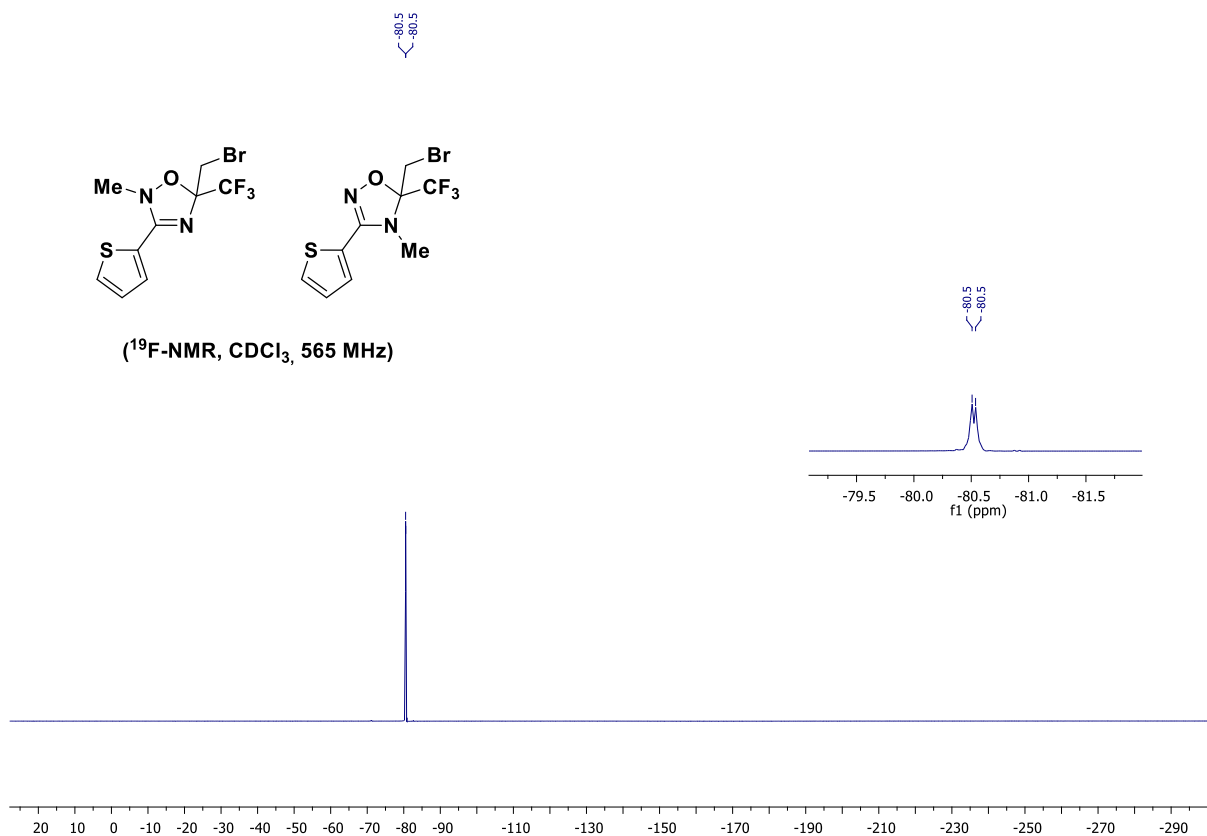

### 3-(4-bromophenyl)-5-(iodomethyl)-4-(methyl- $d_3$ )-5-(trifluoromethyl)-4,5-dihydro-1,2,4-oxadiazole (24)

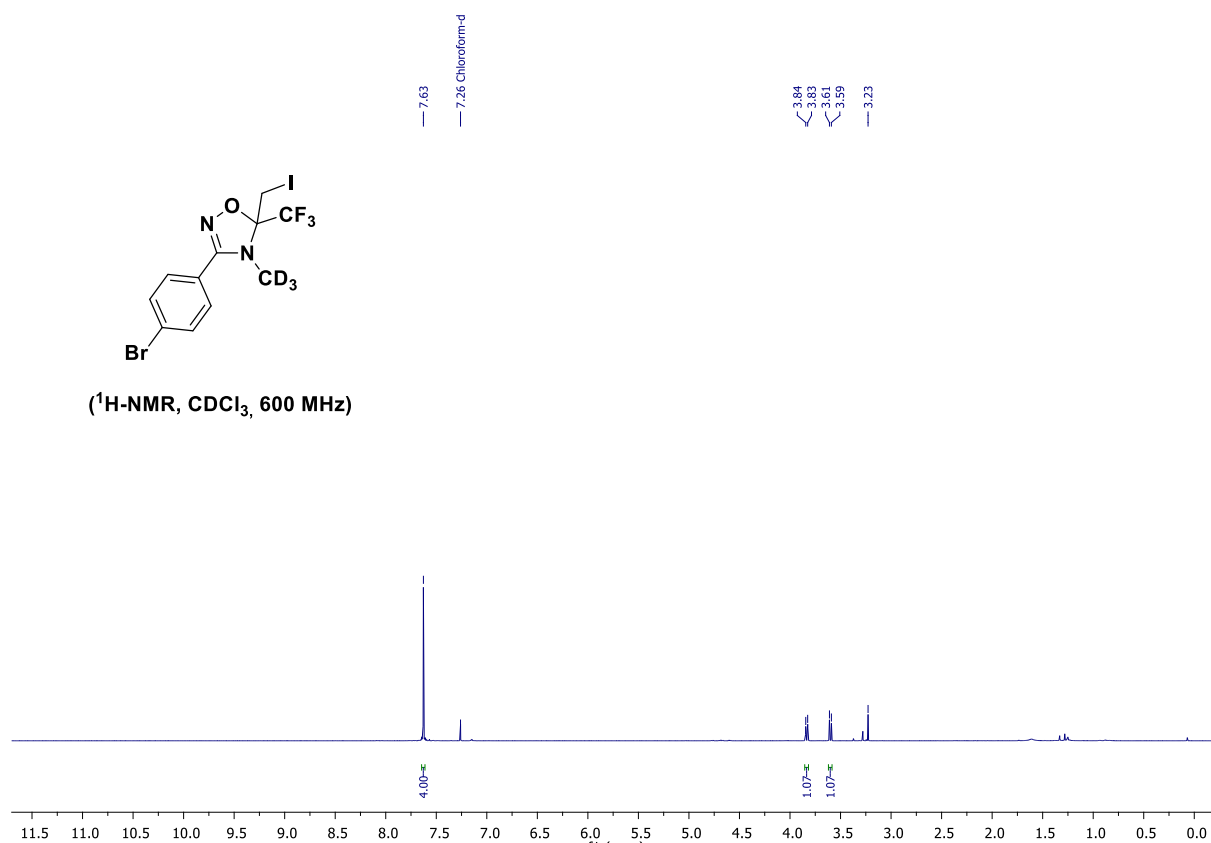



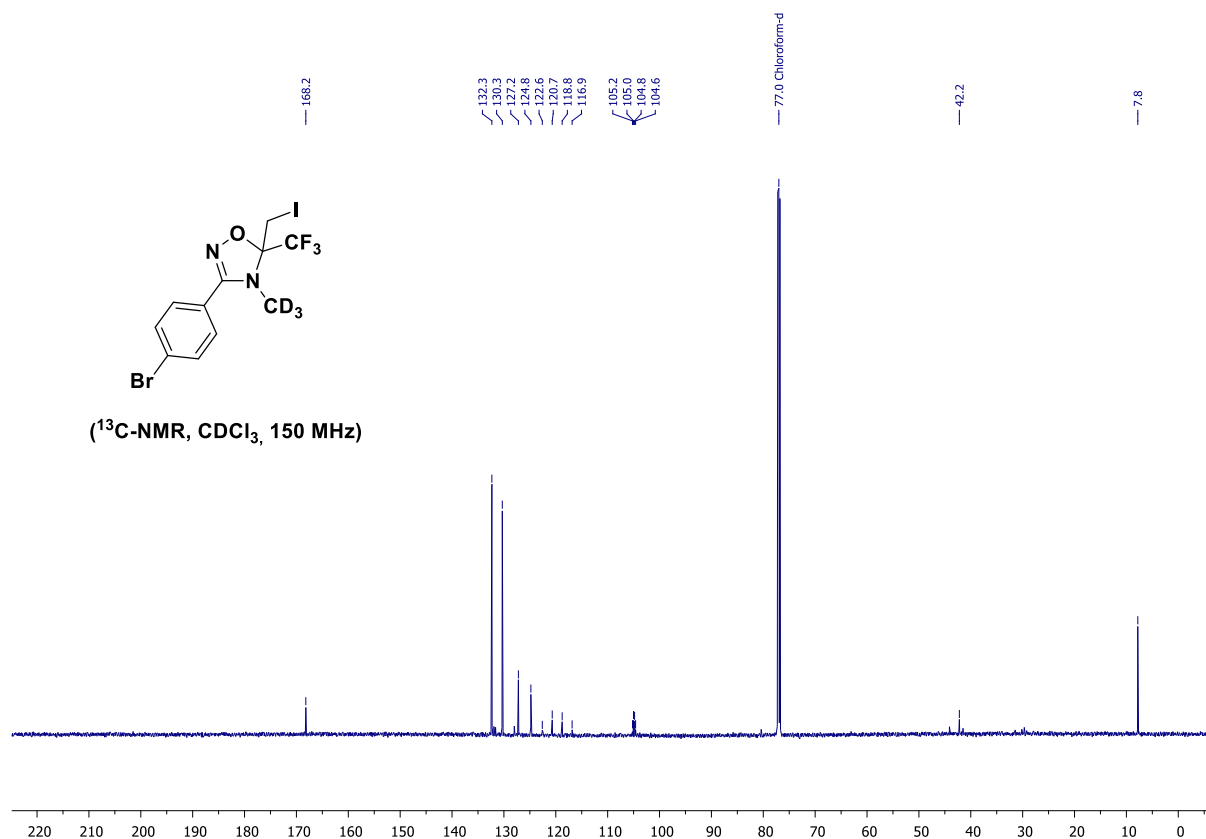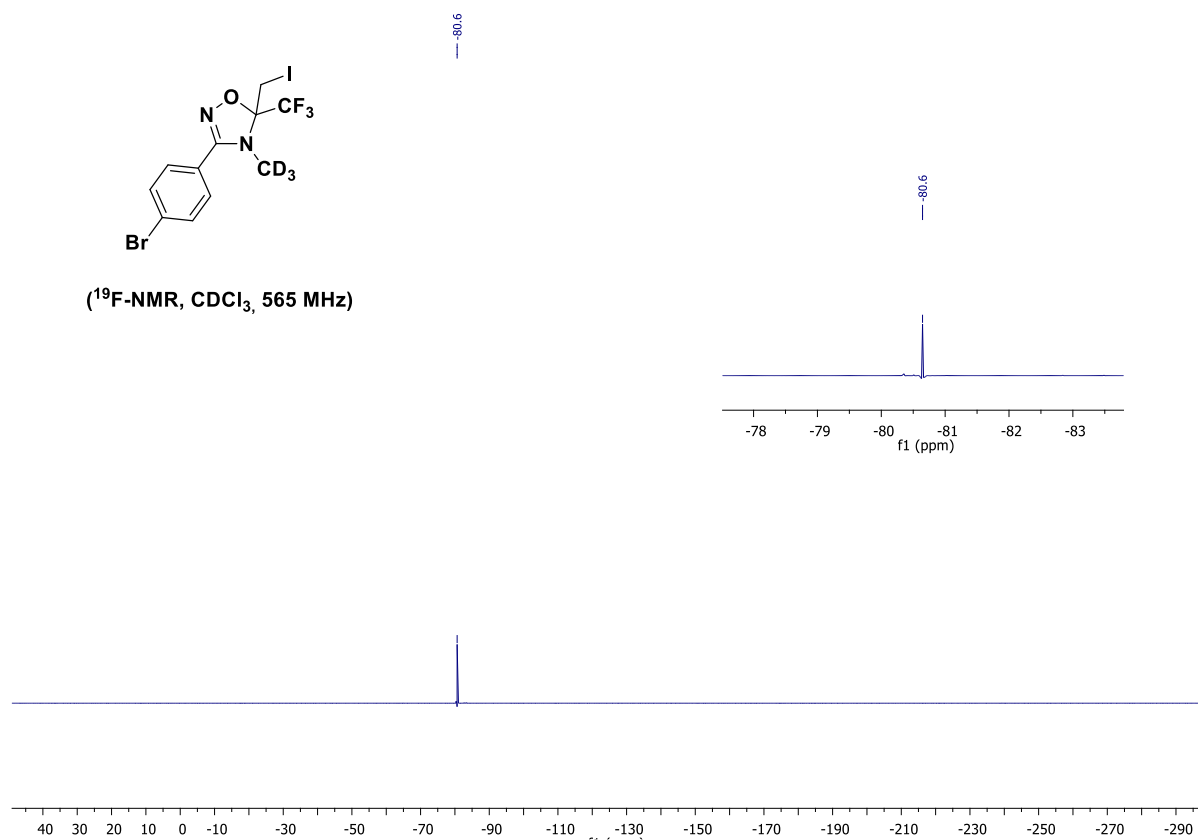



**3-(pyridin-4-yl)-5-(trifluoromethyl)-5-((trimethylsilyl)methyl)-2,5-dihydro-1,2,4-oxadiazole (25)**

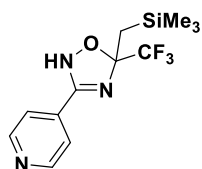

(<sup>1</sup>H-NMR, CDCl<sub>3</sub>, 600 MHz)

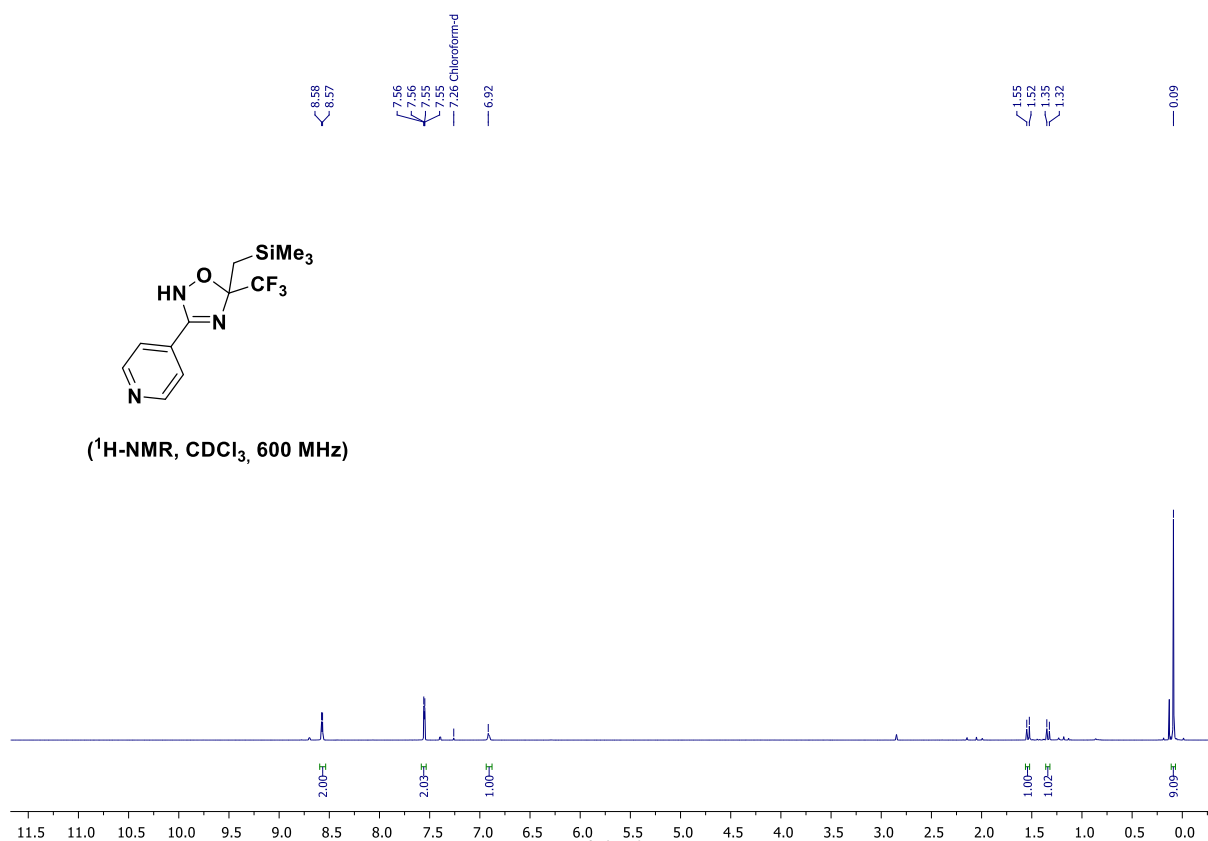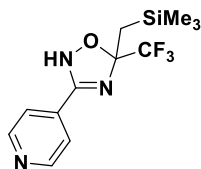

(<sup>13</sup>C-NMR, CDCl<sub>3</sub>, 150 MHz)

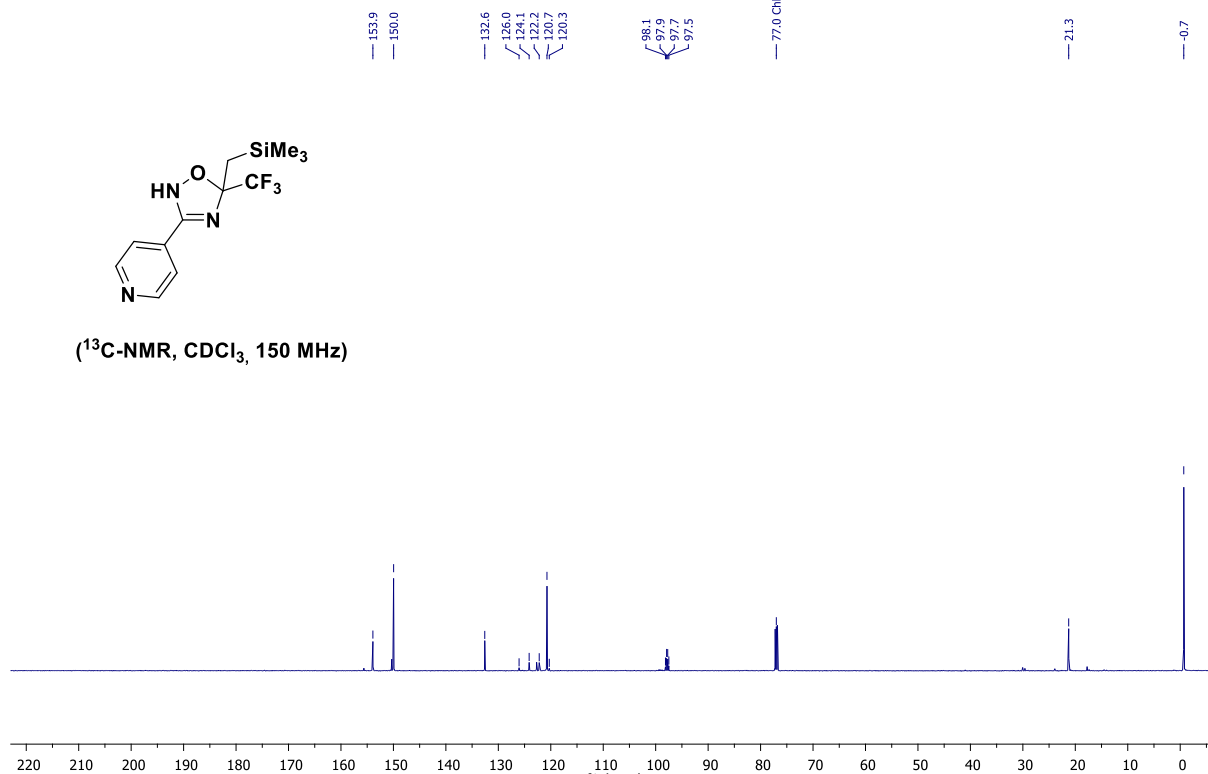



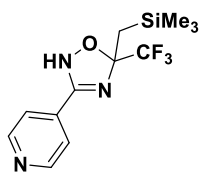

(<sup>19</sup>F-NMR, CDCl<sub>3</sub>, 565 MHz)

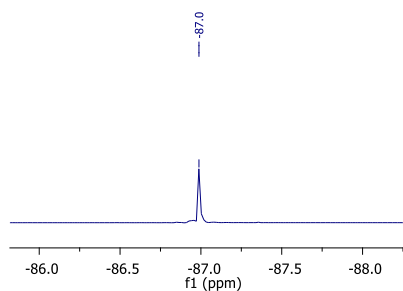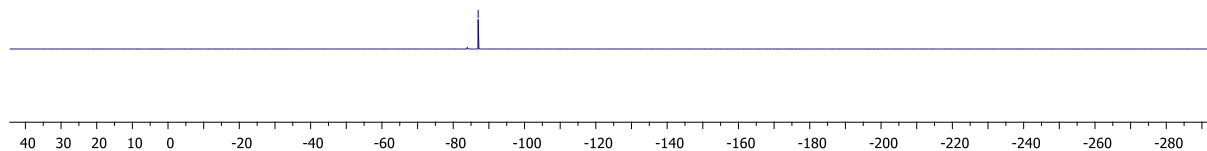

### 3-(4-methoxyphenyl)-5-methyl-5-(trifluoromethyl)-2,5-dihydro-1,2,4-oxadiazole (26)

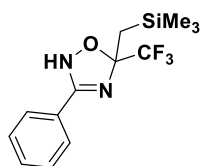

(<sup>1</sup>H-NMR, CDCl<sub>3</sub>, 600 MHz)

7.65  
7.64  
7.64  
7.48  
7.46  
7.46  
7.41  
7.39  
7.38  
7.26 Chloroform-d

5.21

1.58  
1.55  
1.54  
1.37

0.13

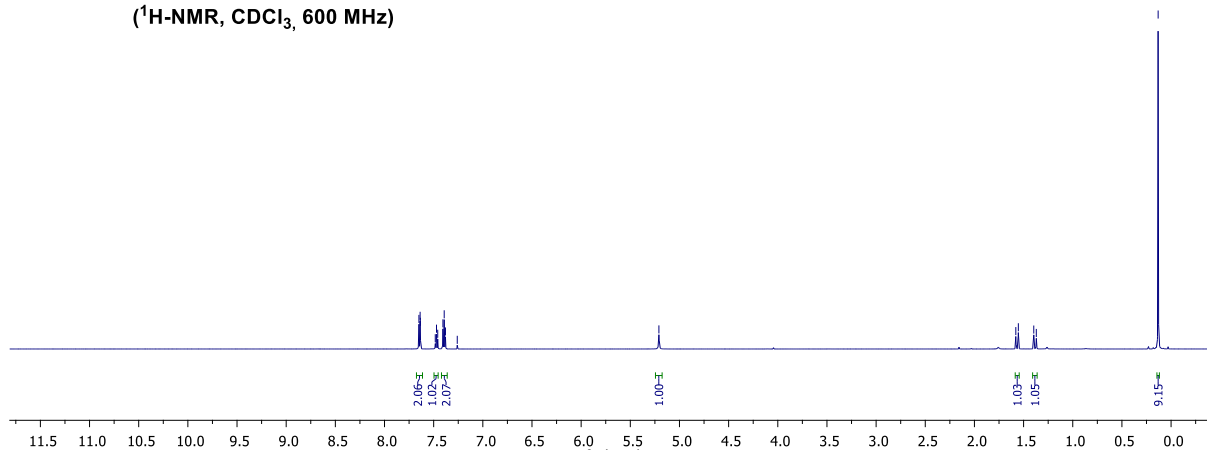



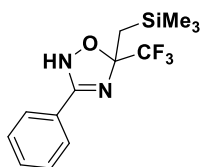

( $^{13}\text{C}$ -NMR,  $\text{CDCl}_3$ , 150 MHz)

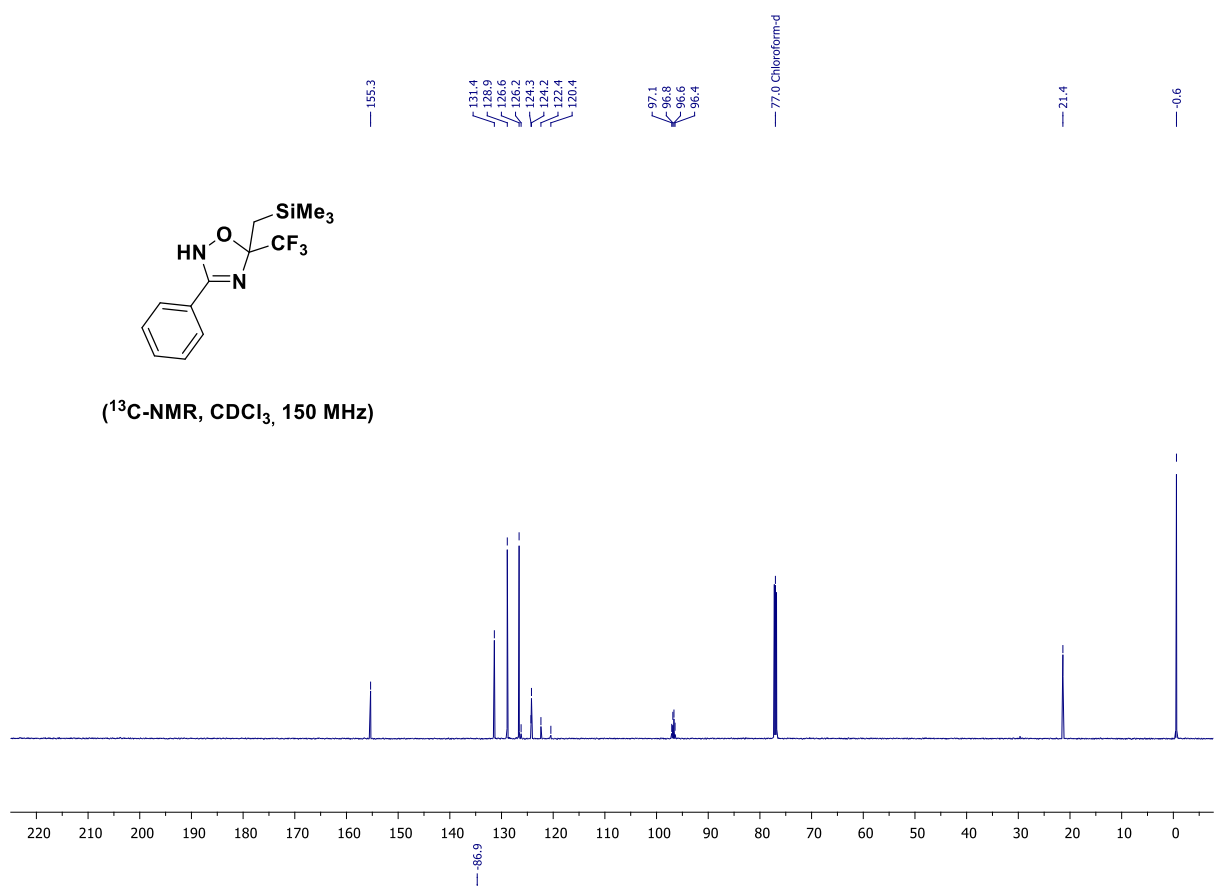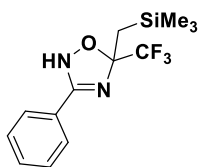

( $^{19}\text{F}$ -NMR,  $\text{CDCl}_3$ , 565 MHz)

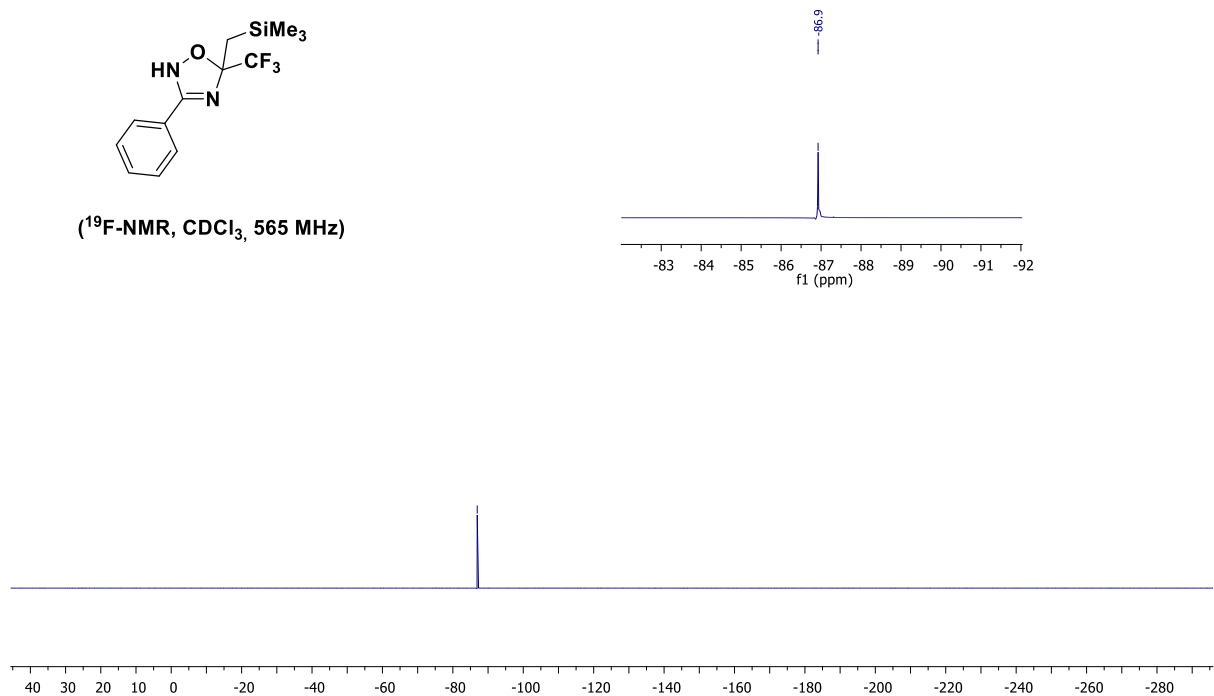



2-(3-phenyl-5-(trifluoromethyl)-2,5-dihydro-1,2,4-oxadiazol-5-yl)acetonitrile (27)

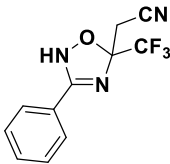

(<sup>1</sup>H-NMR, Acetone-*d*<sub>6</sub>, 400 MHz)

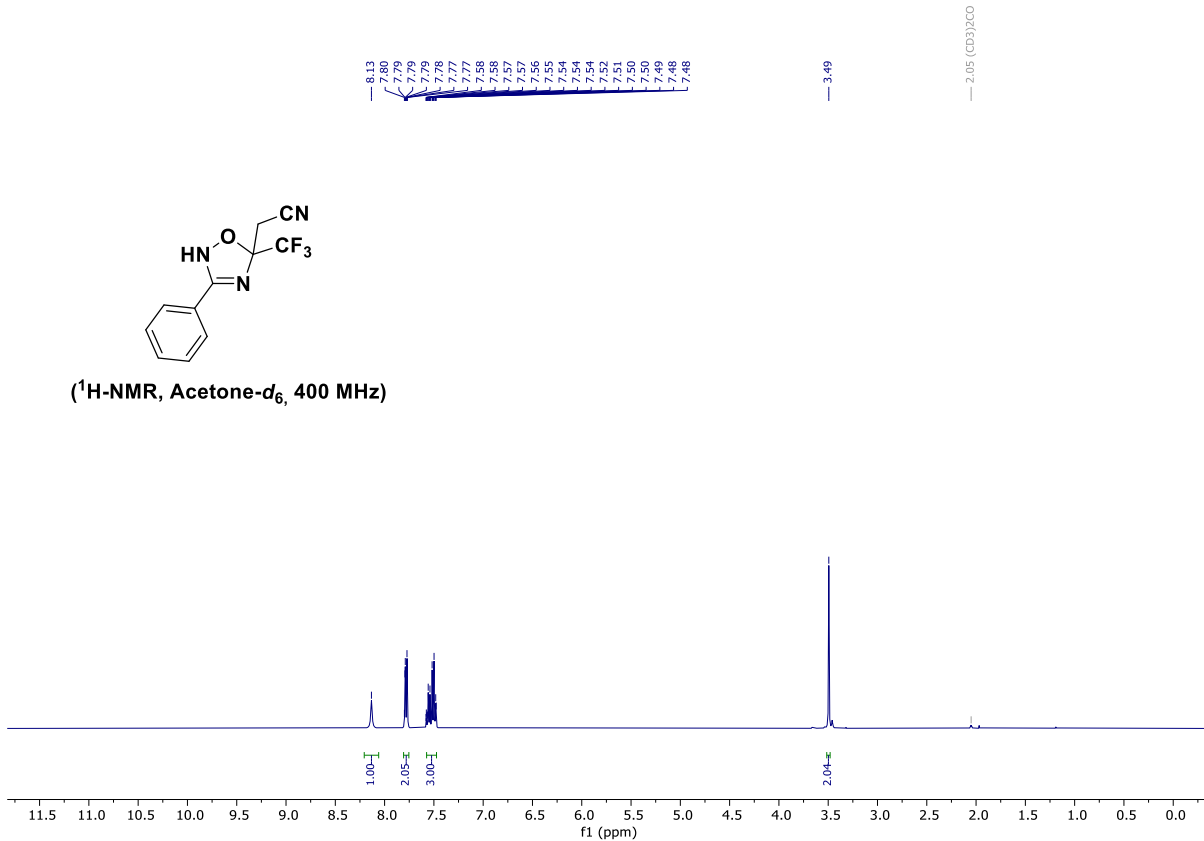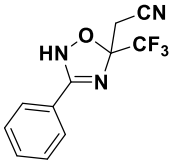

(<sup>13</sup>C-NMR, Acetone-*d*<sub>6</sub>, 100 MHz)

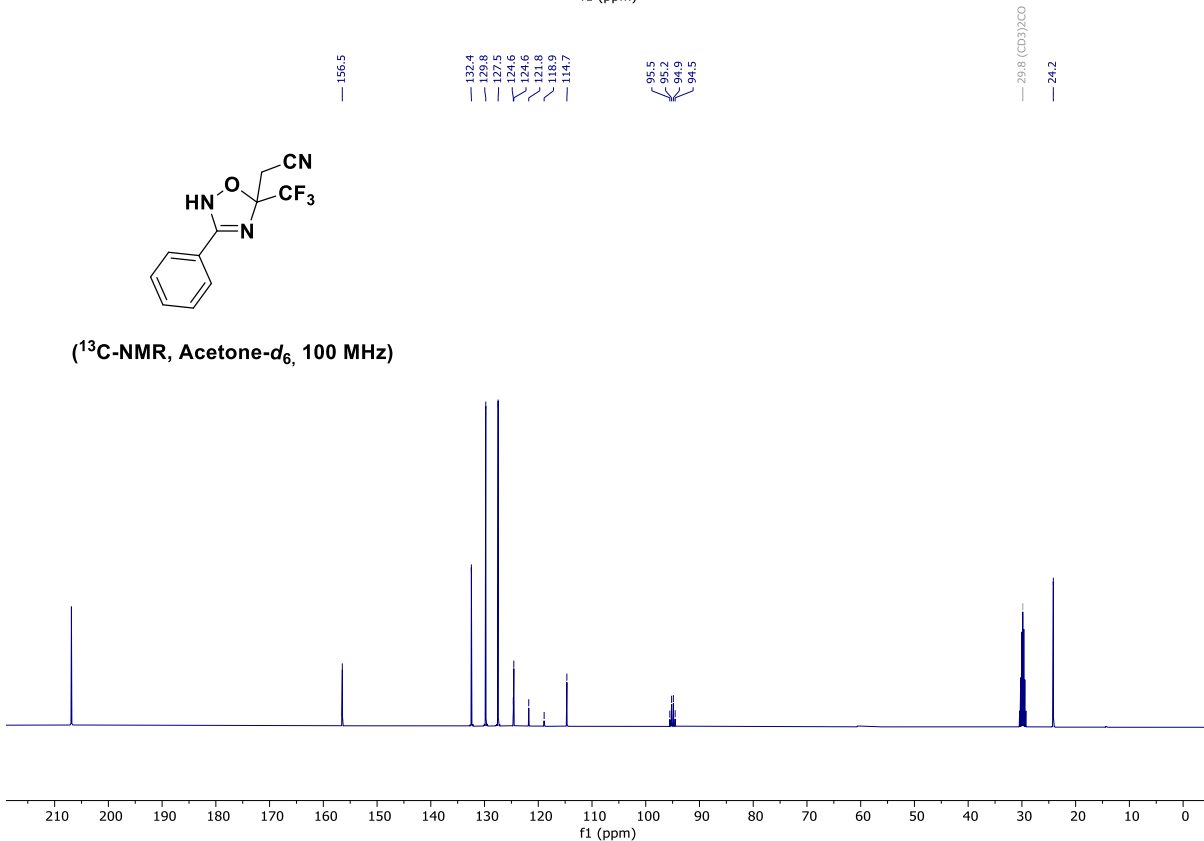



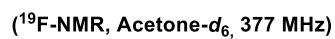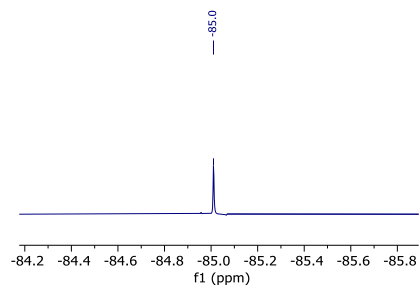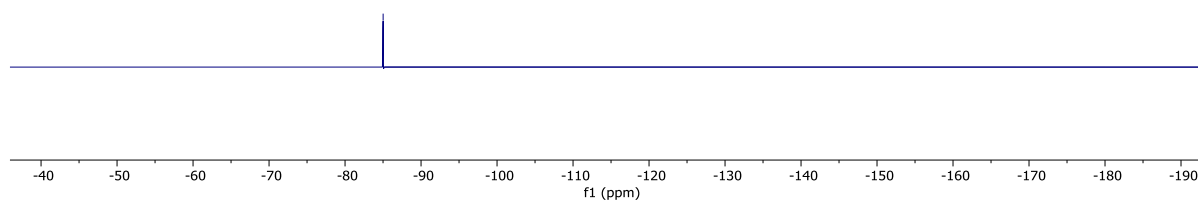COC(C(F)(F)F)1NC(=N1)c2ccccc2

(<sup>1</sup>H-NMR, Acetone-*d*<sub>6</sub>, 400 MHz)

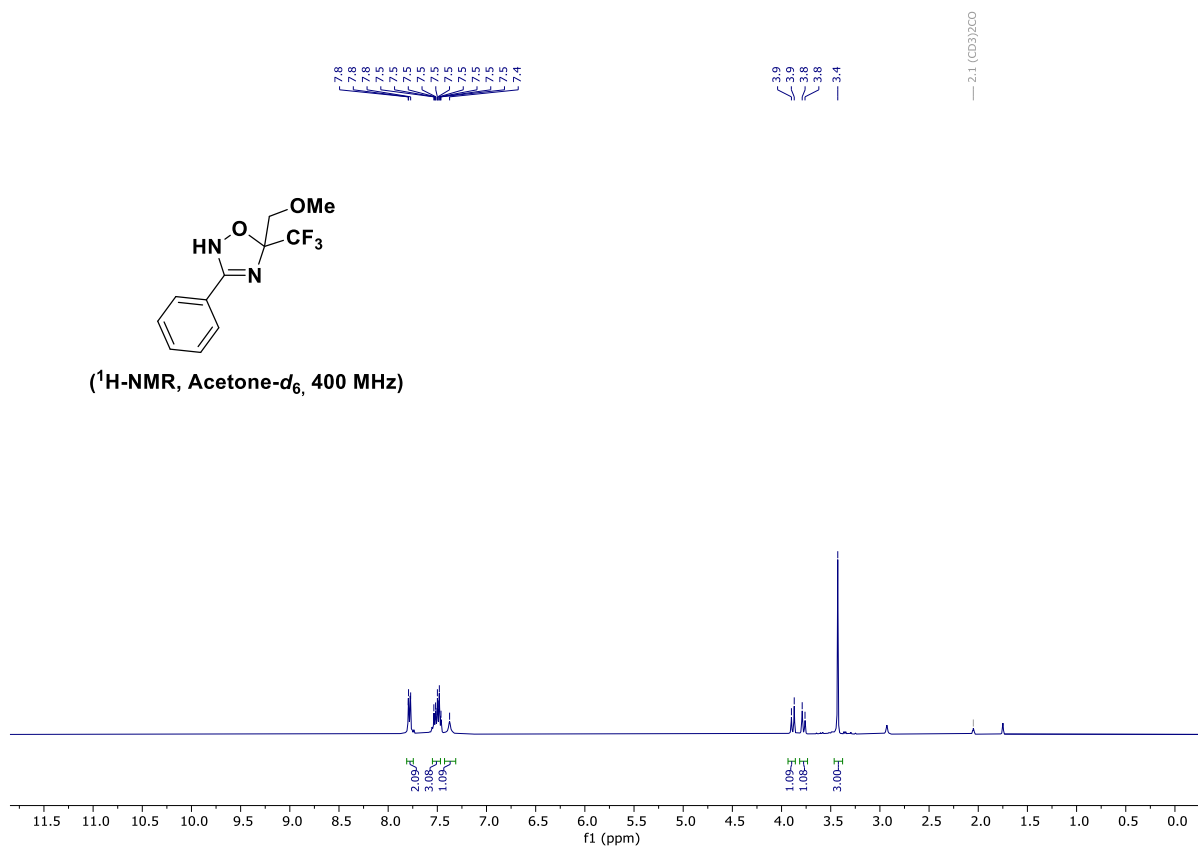



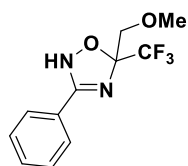

(<sup>13</sup>C-NMR, Acetone-*d*<sub>6</sub>, 100 MHz)

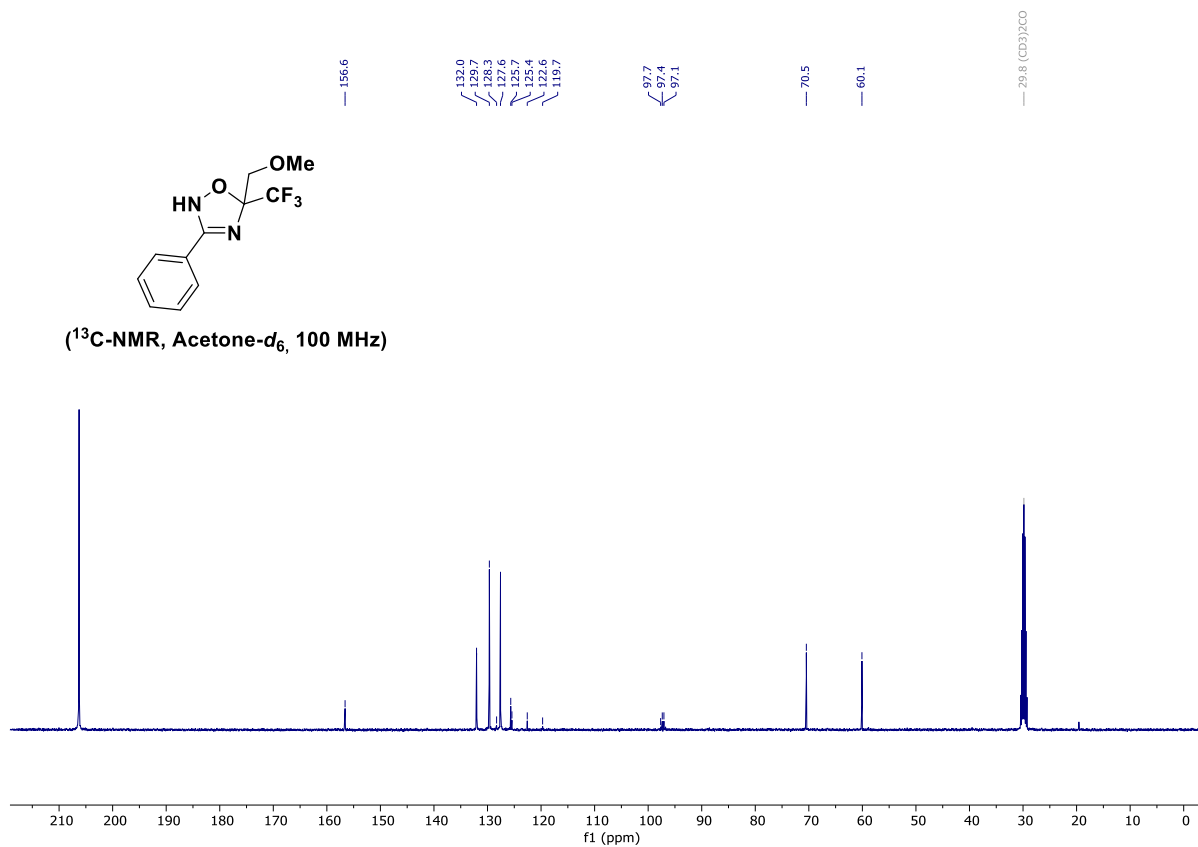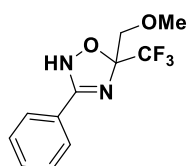

(<sup>19</sup>F-NMR, Acetone-*d*<sub>6</sub>, 377 MHz)

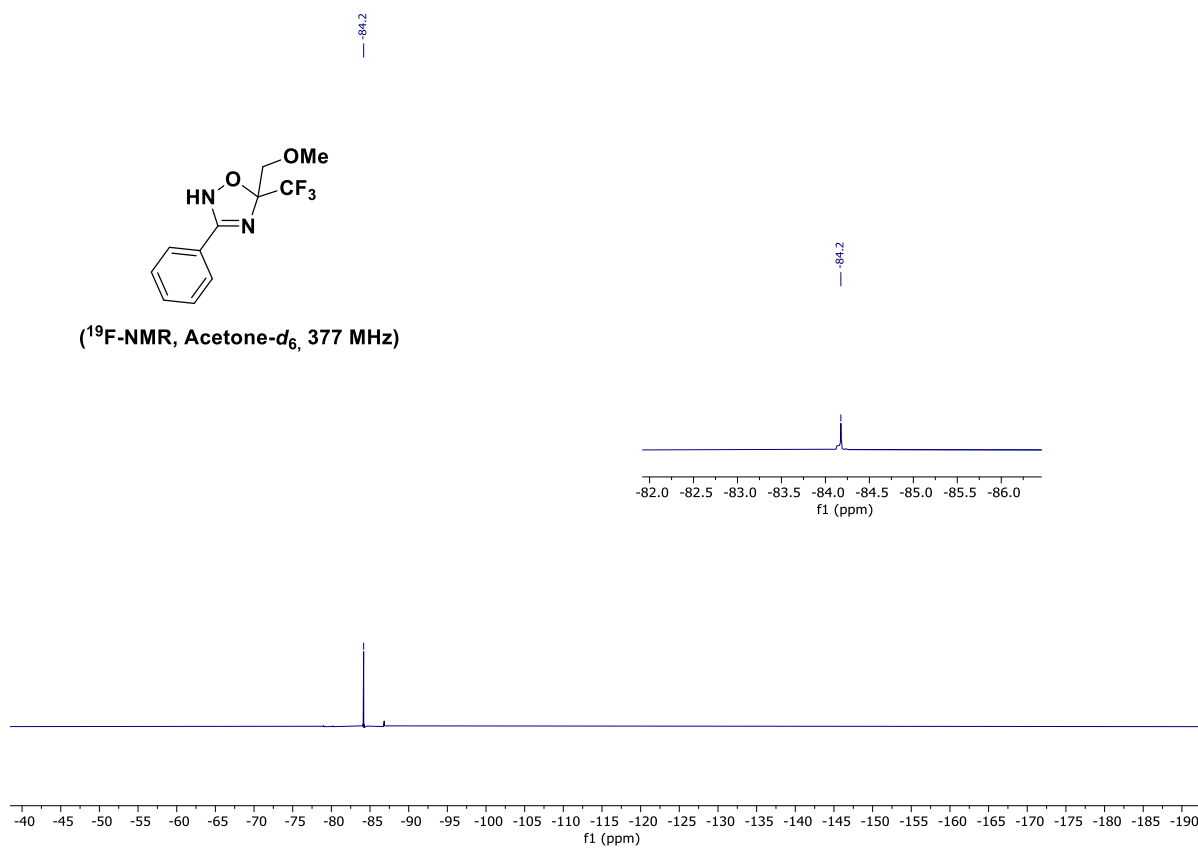



5-((methylthio)methyl)-3-phenyl-5-(trifluoromethyl)-2,5-dihydro-1,2,4-oxadiazole (29)

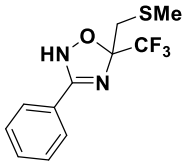

(<sup>1</sup>H-NMR, Acetone-*d*<sub>6</sub>, 400 MHz)

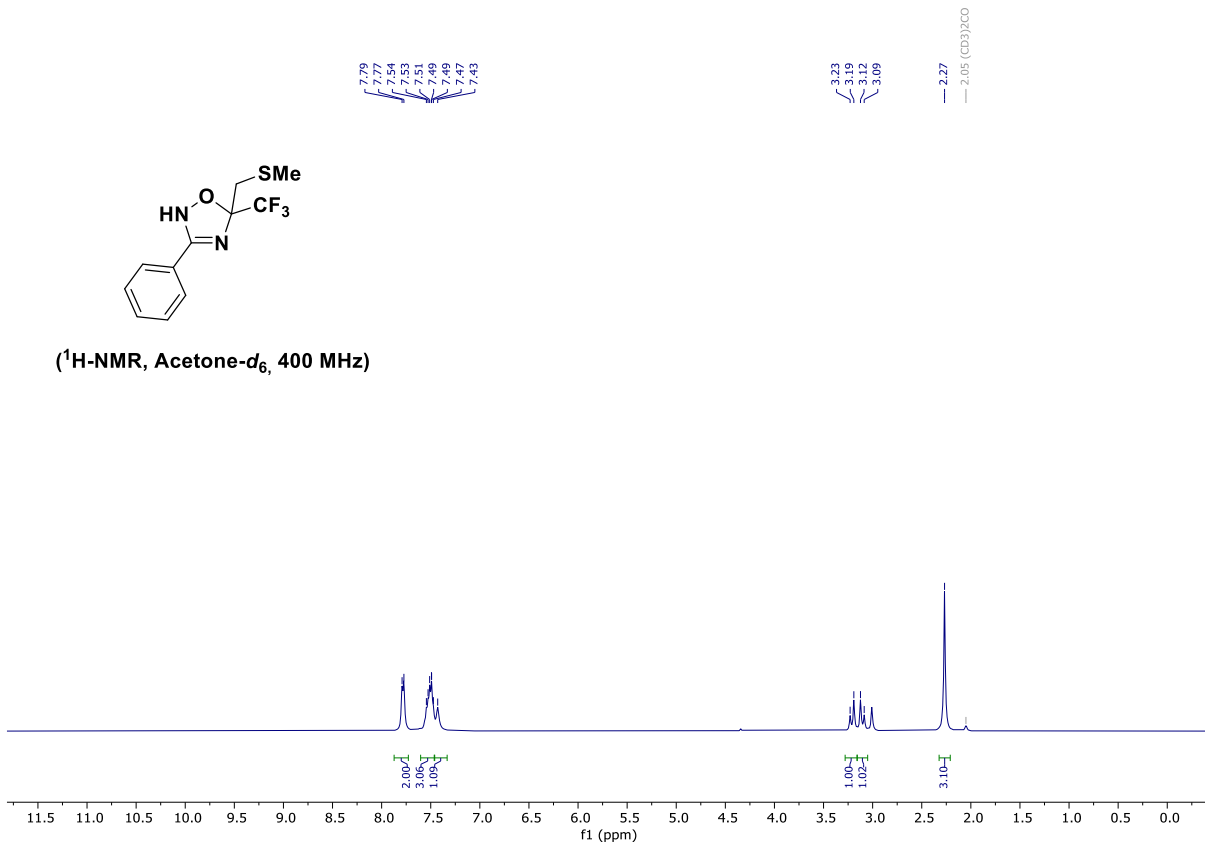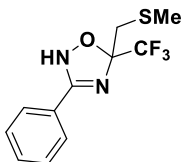

(<sup>13</sup>C-NMR, Acetone-*d*<sub>6</sub>, 100 MHz)

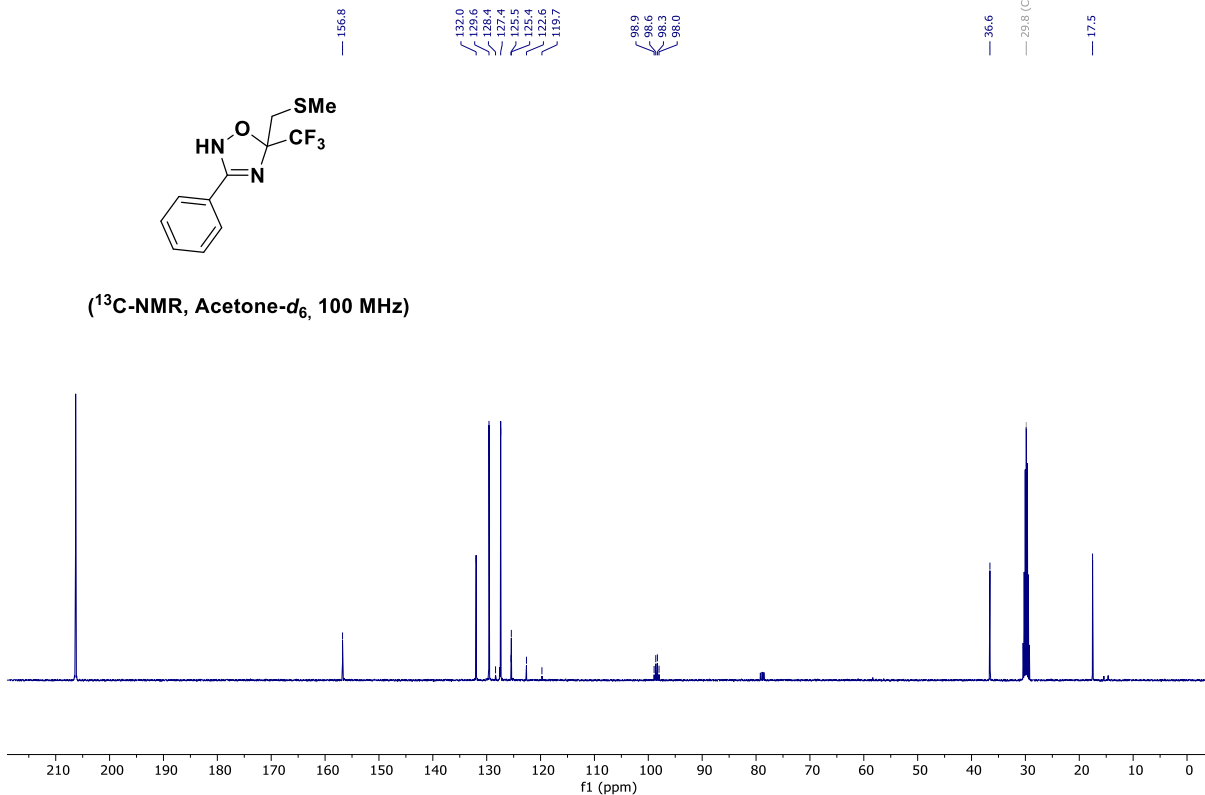



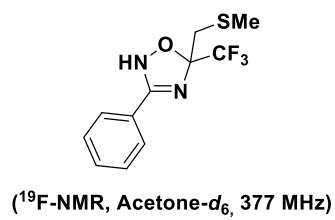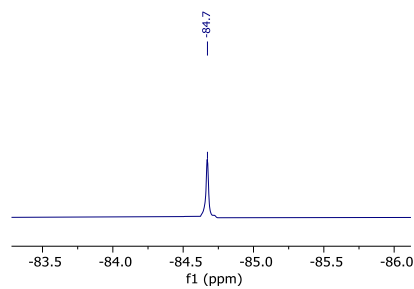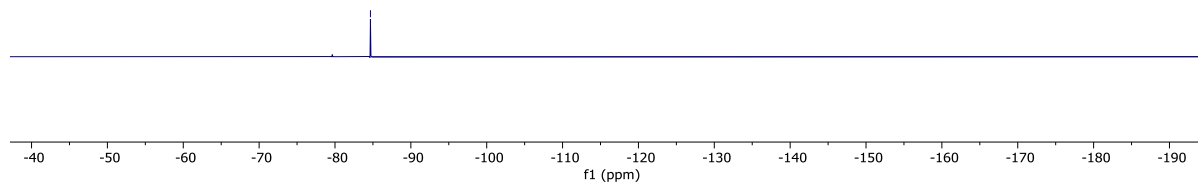

### 3-phenyl-5-((phenylselanyl)methyl)-5-(trifluoromethyl)-2,5-dihydro-1,2,4-oxadiazole (30)

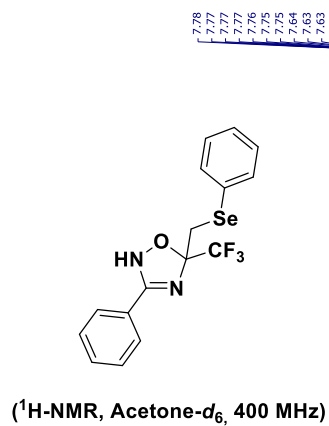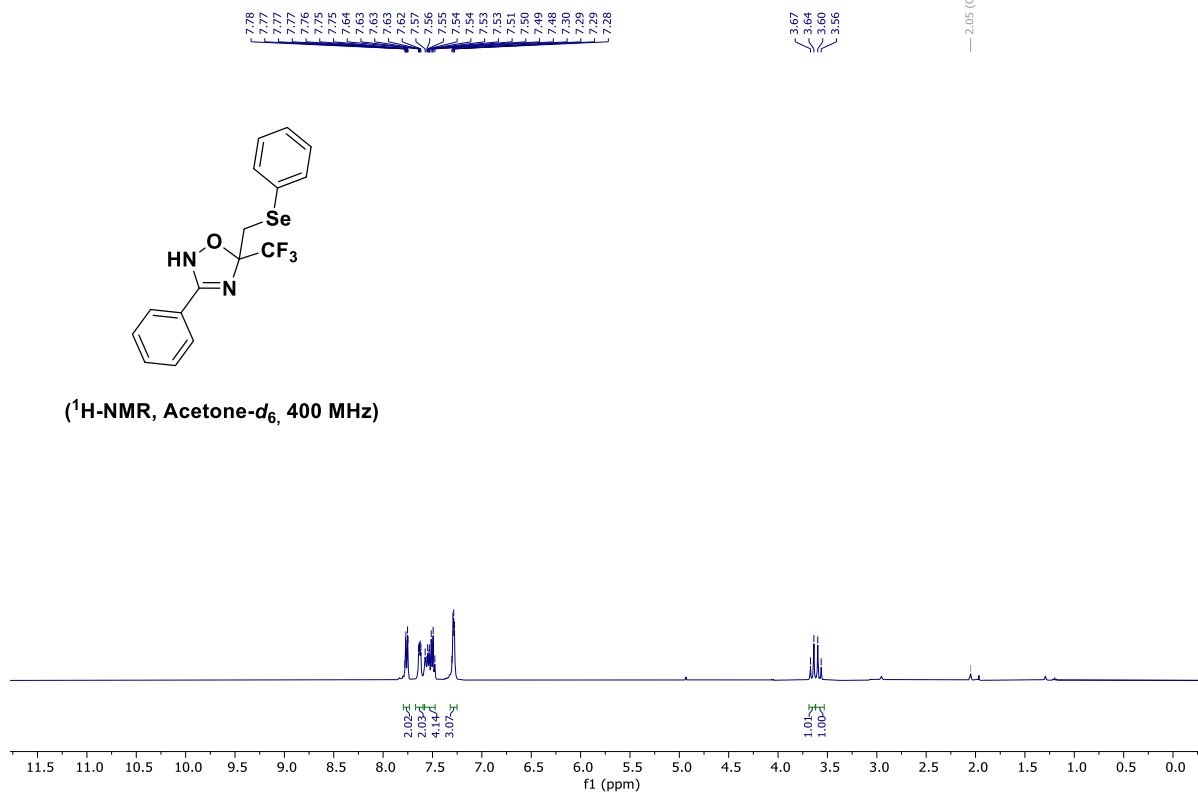



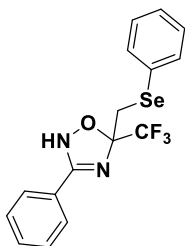

(<sup>13</sup>C-NMR, Acetone-*d*<sub>6</sub>, 100 MHz)

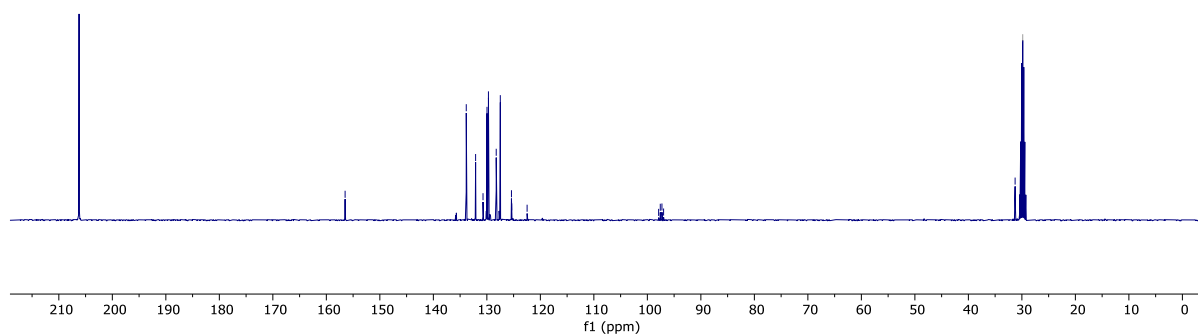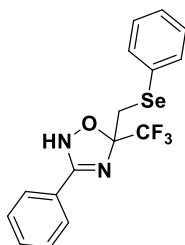

(<sup>19</sup>F-NMR, Acetone-*d*<sub>6</sub>, 377 MHz)

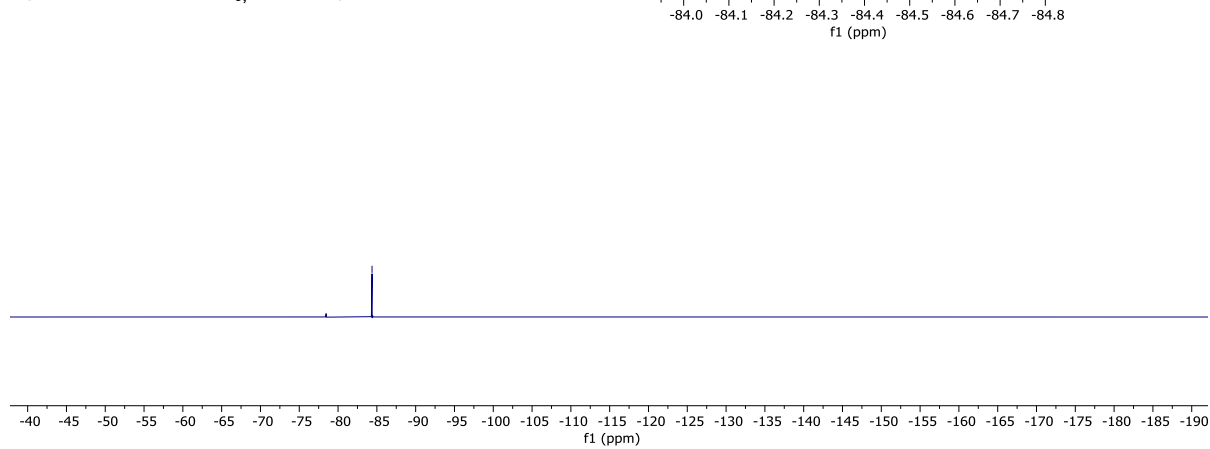



3-phenyl-5,5-bis(trifluoromethyl)-2,5-dihydro-1,2,4-oxadiazole (31)

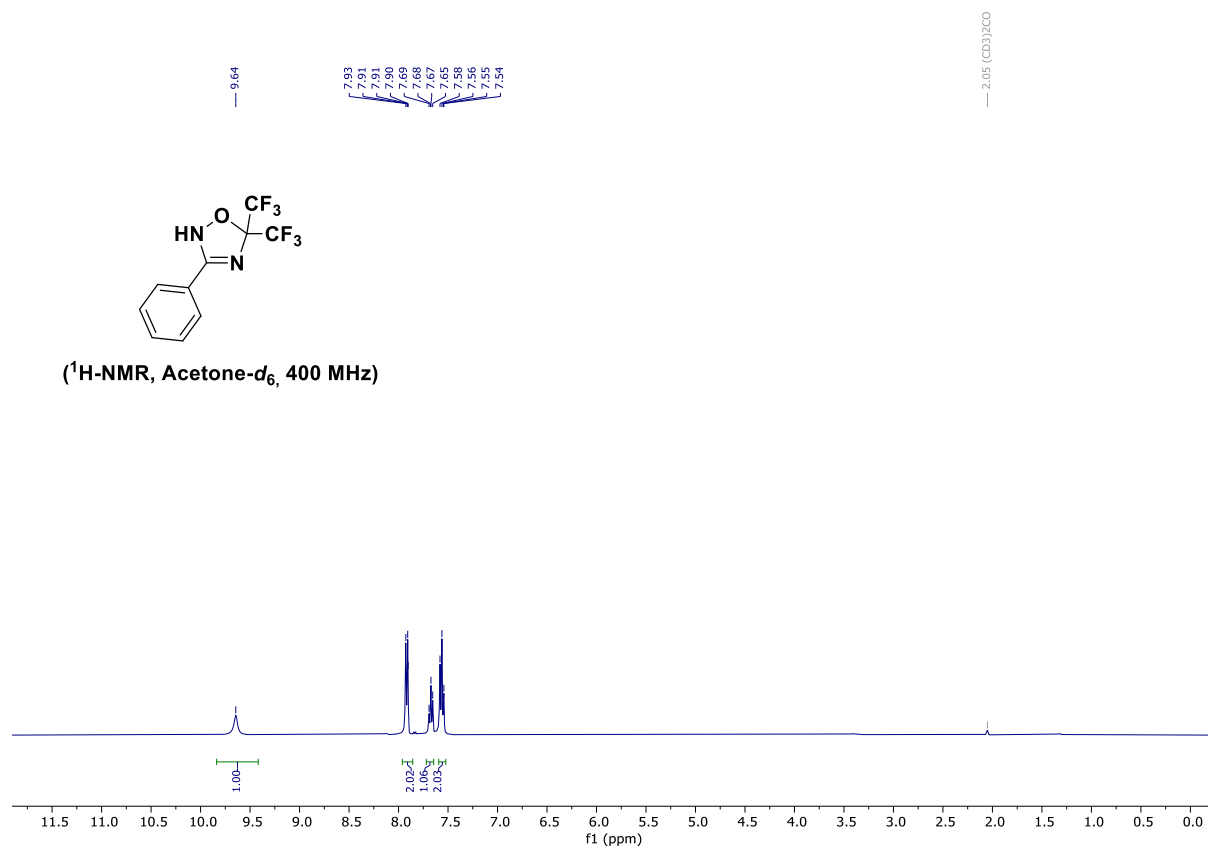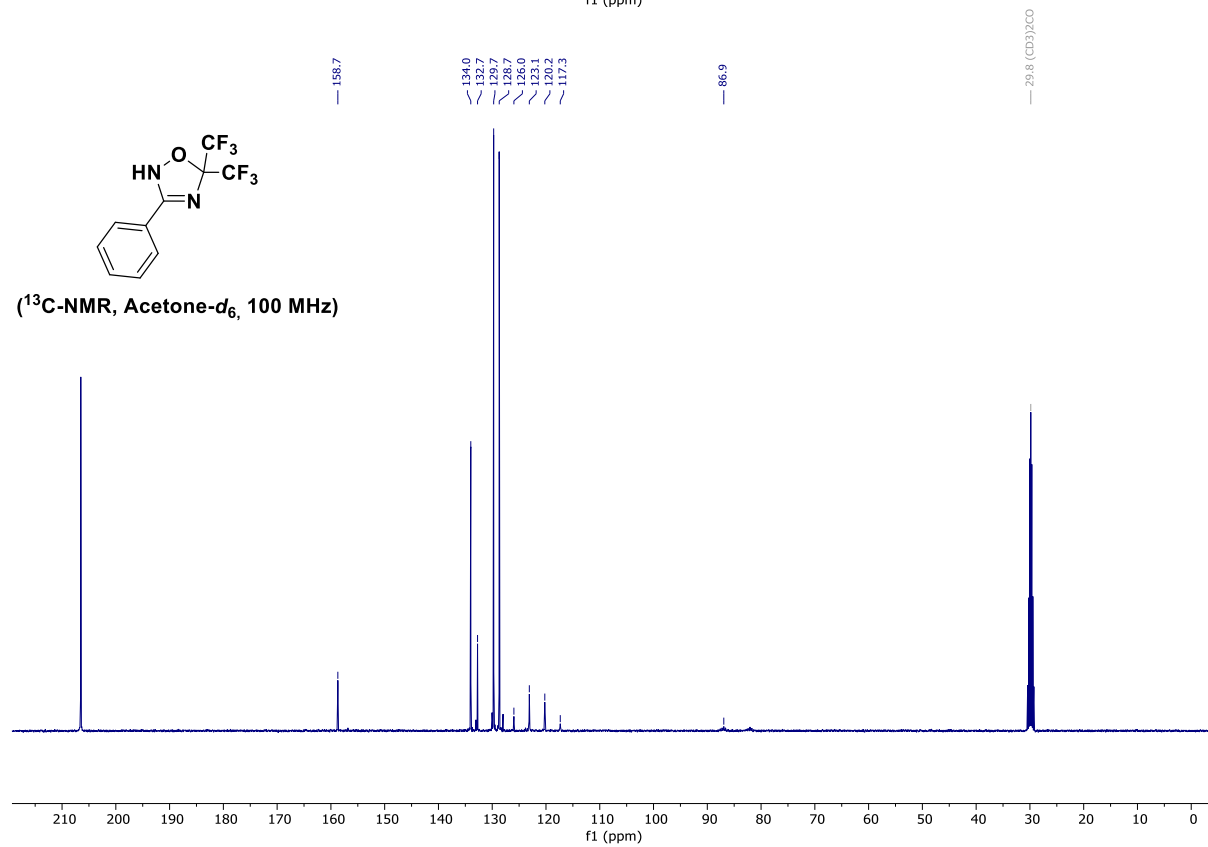



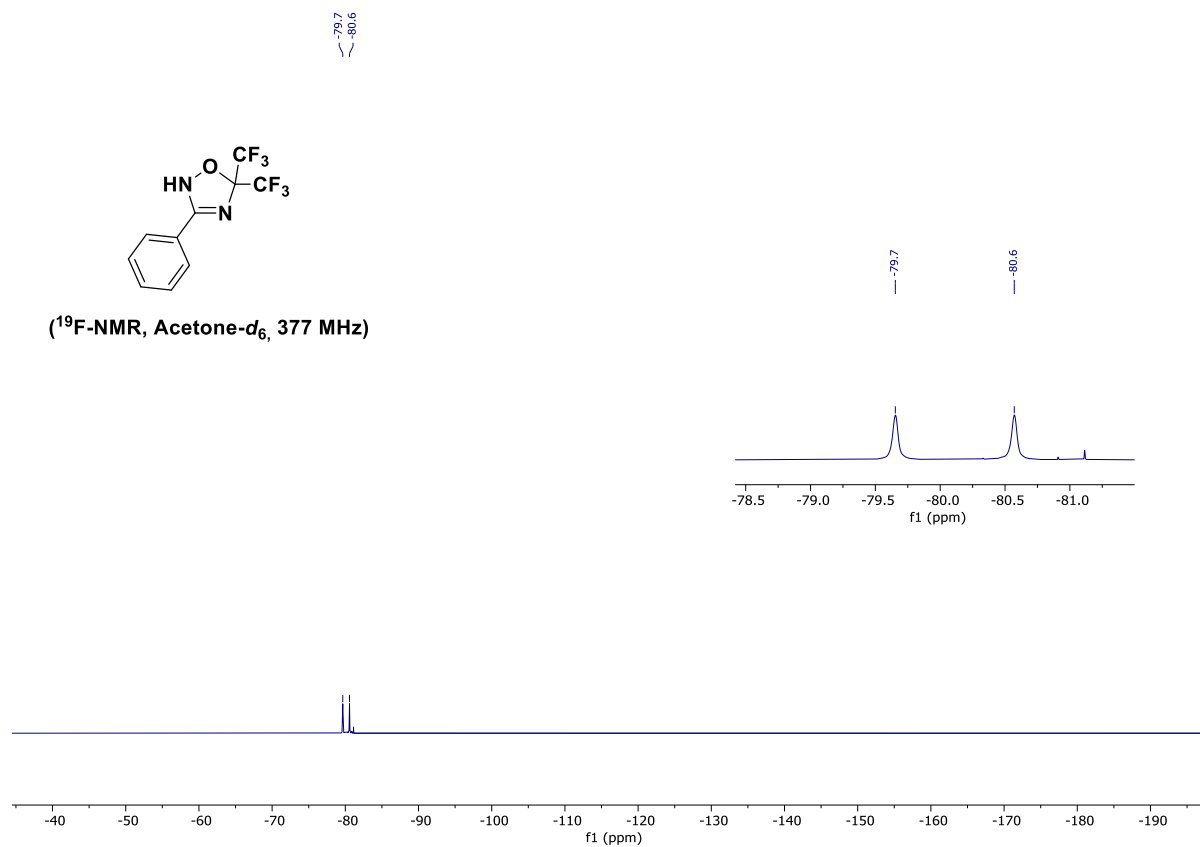

**5-(difluoromethyl)-3-phenyl-5-(trifluoromethyl)-2,5-dihydro-1,2,4-oxadiazole (32)**

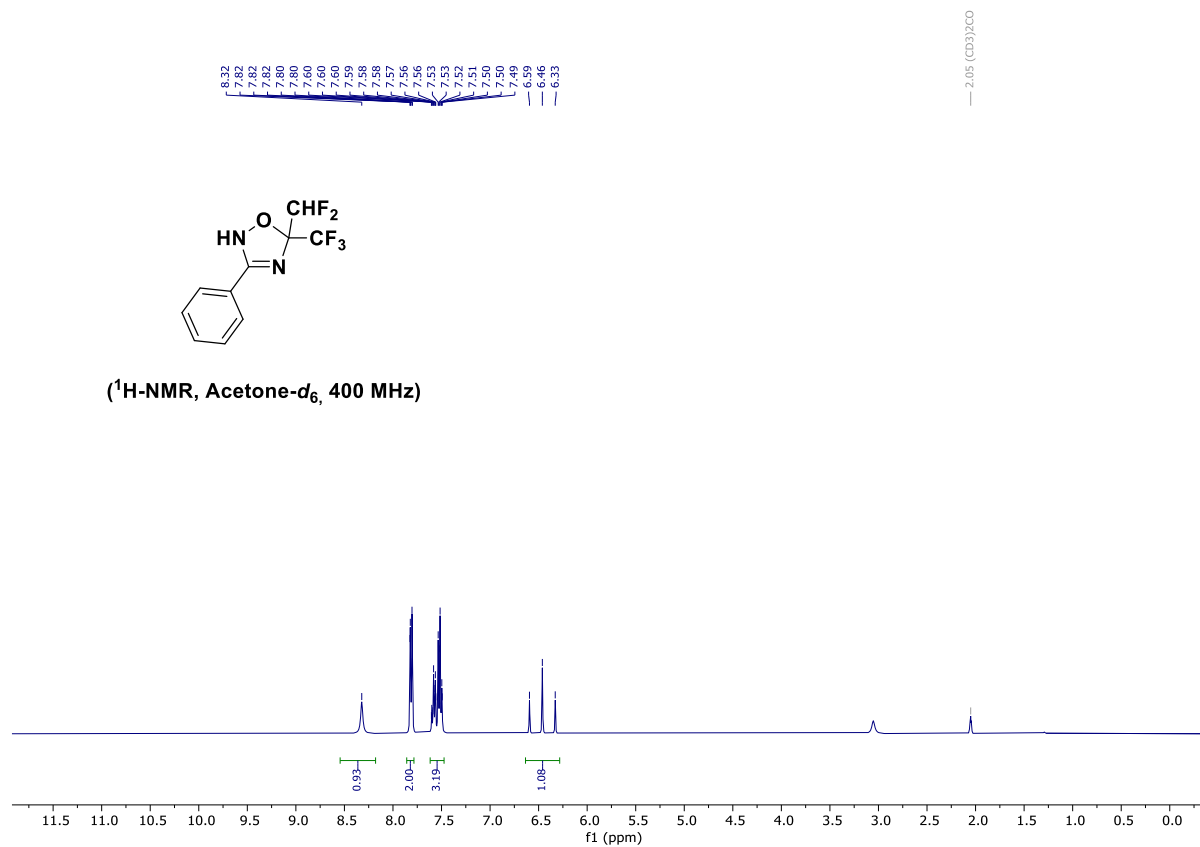



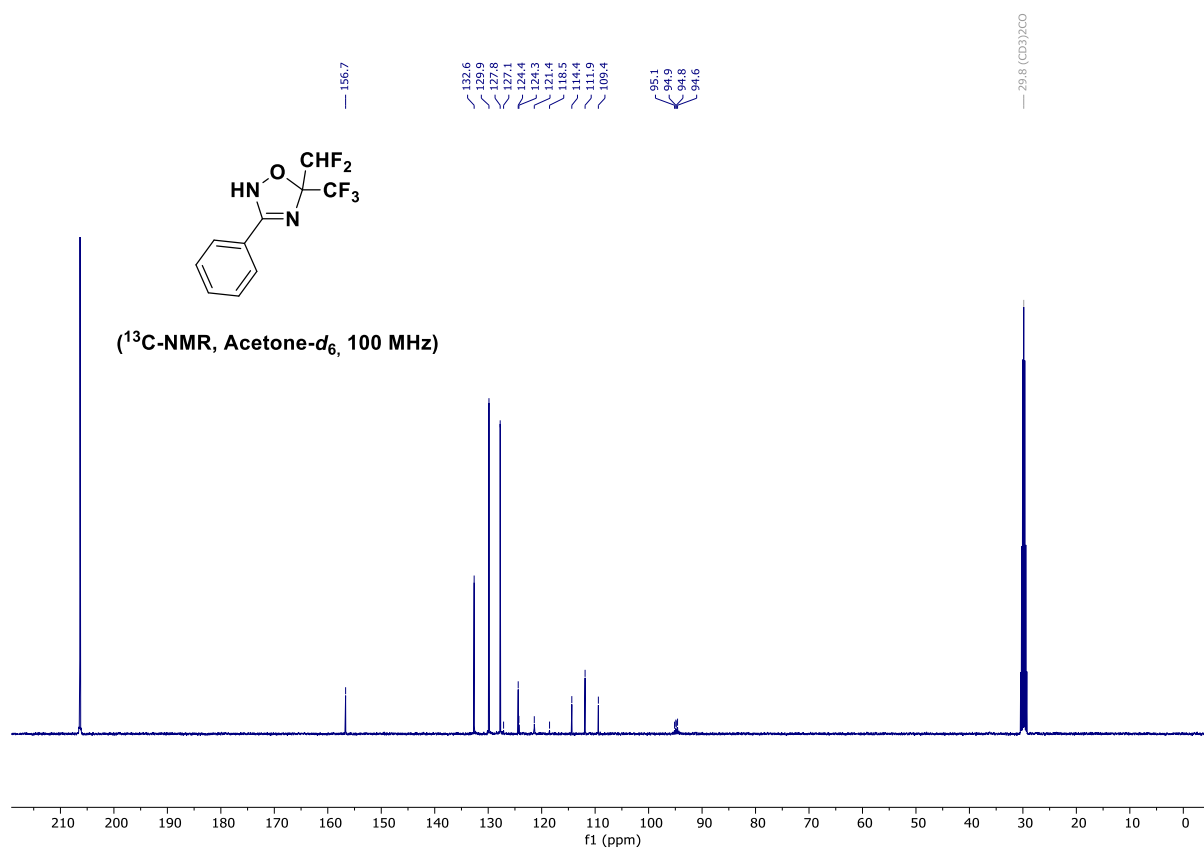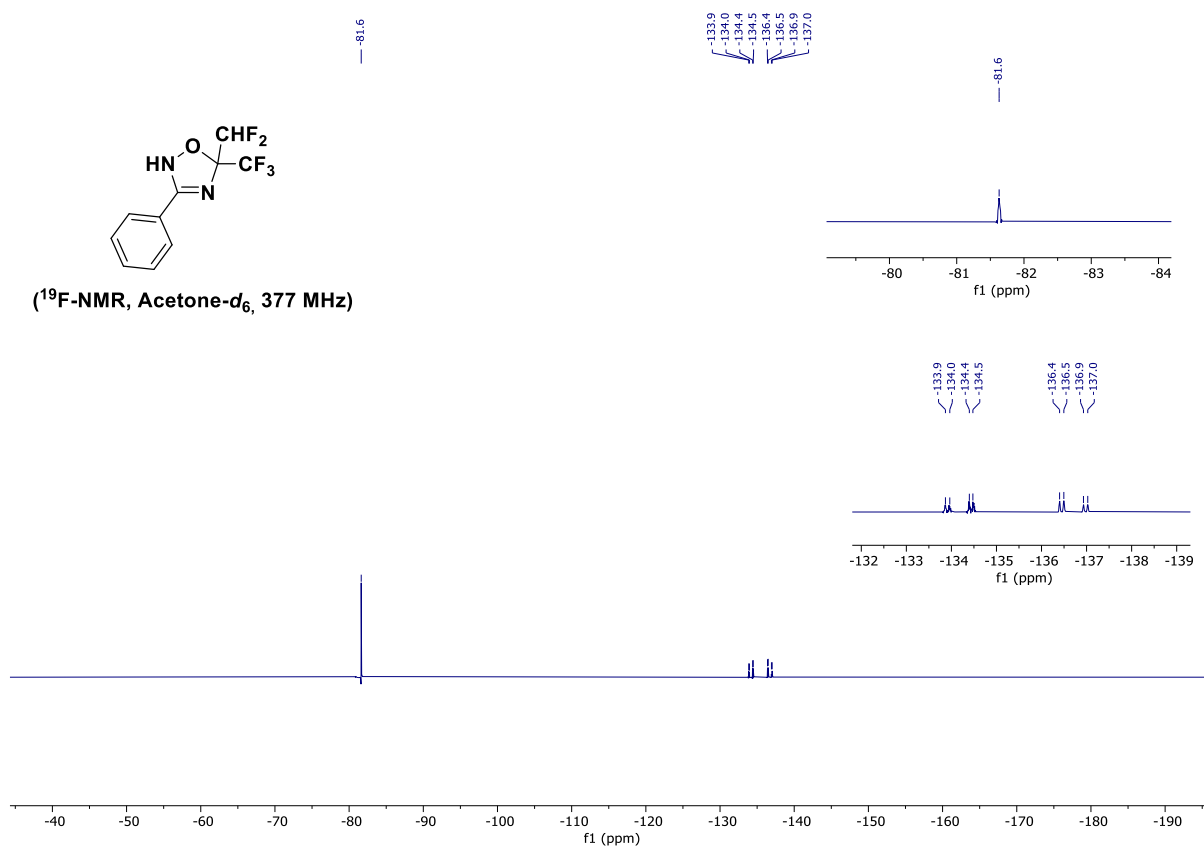



3-(4-methoxyphenyl)-5-methyl-5-(trifluoromethyl)-2,5-dihydro-1,2,4-oxadiazole (33)

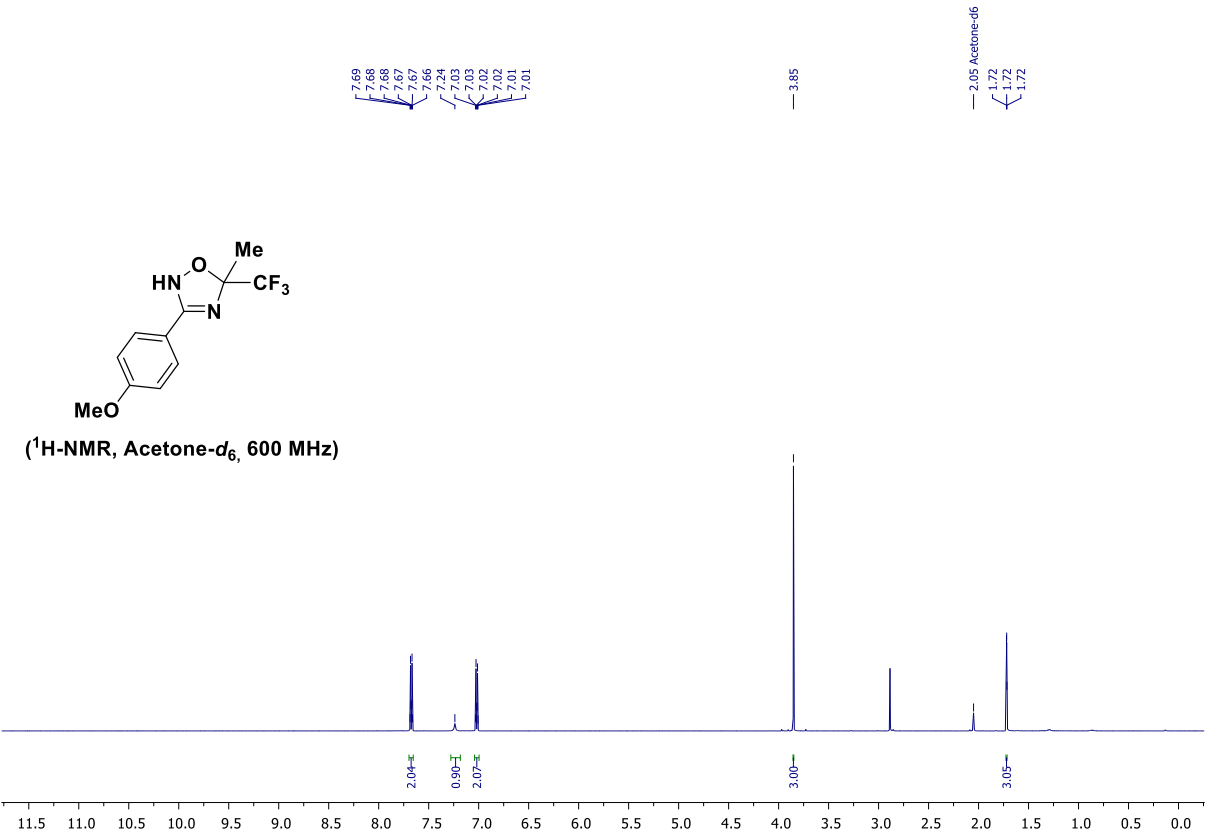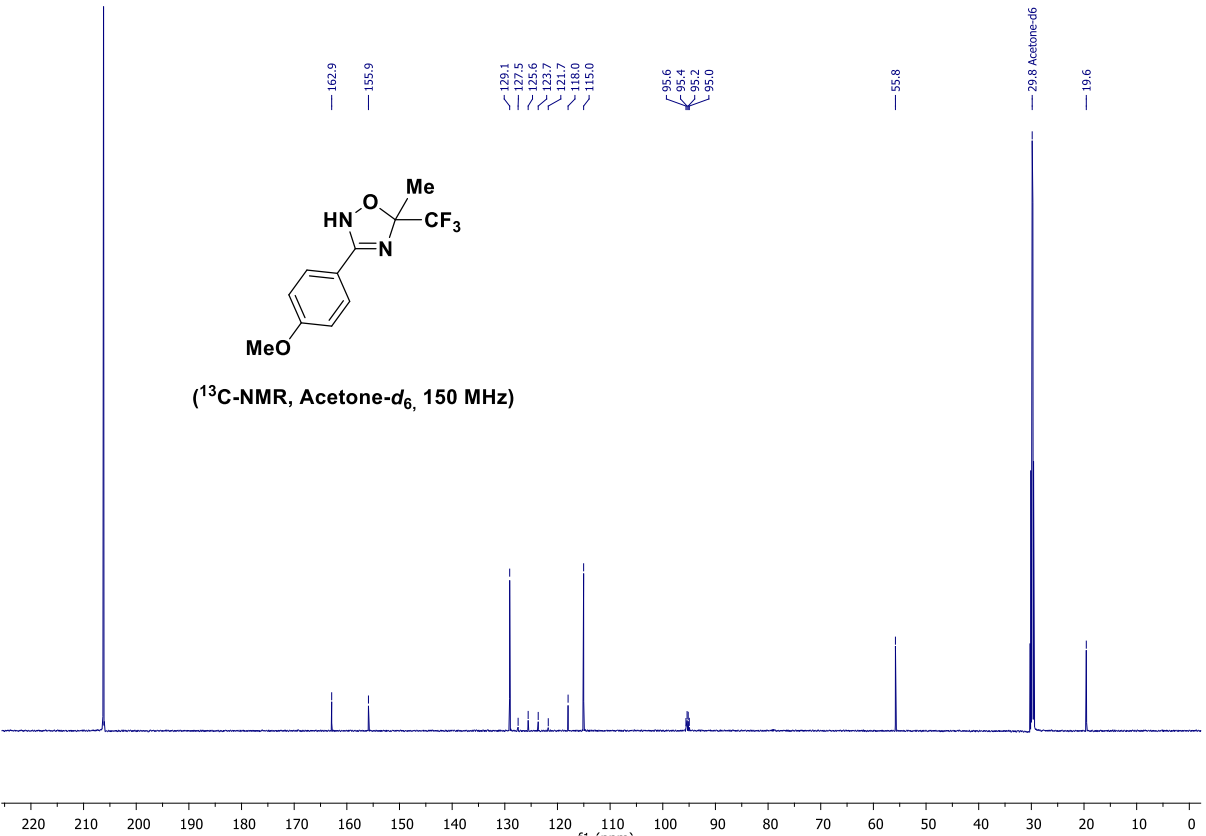



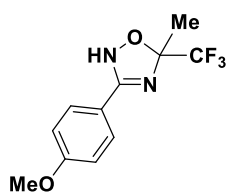

( $^{19}\text{F}$ -NMR, Acetone- $d_6$ , 565 MHz)

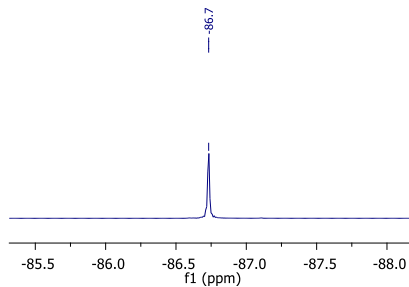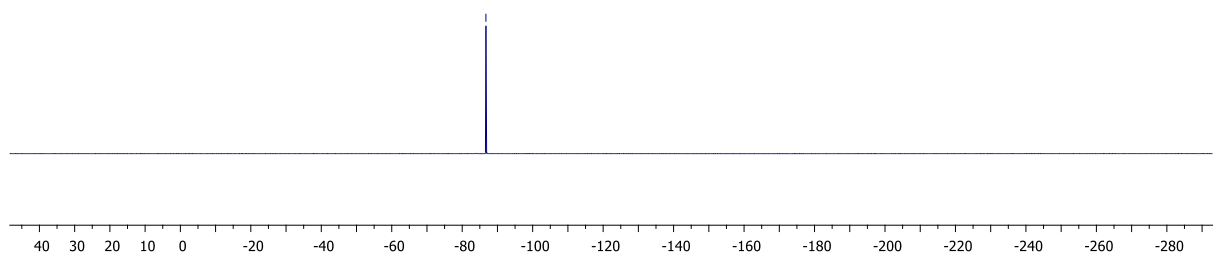

5-butyl-3-phenyl-5-(trifluoromethyl)-2,5-dihydro-1,2,4-oxadiazole (34)

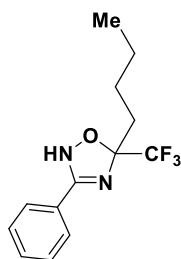

( $^1\text{H}$ -NMR, Acetone- $d_6$ , 600 MHz)

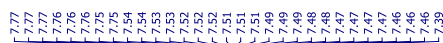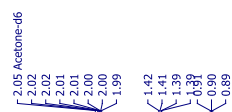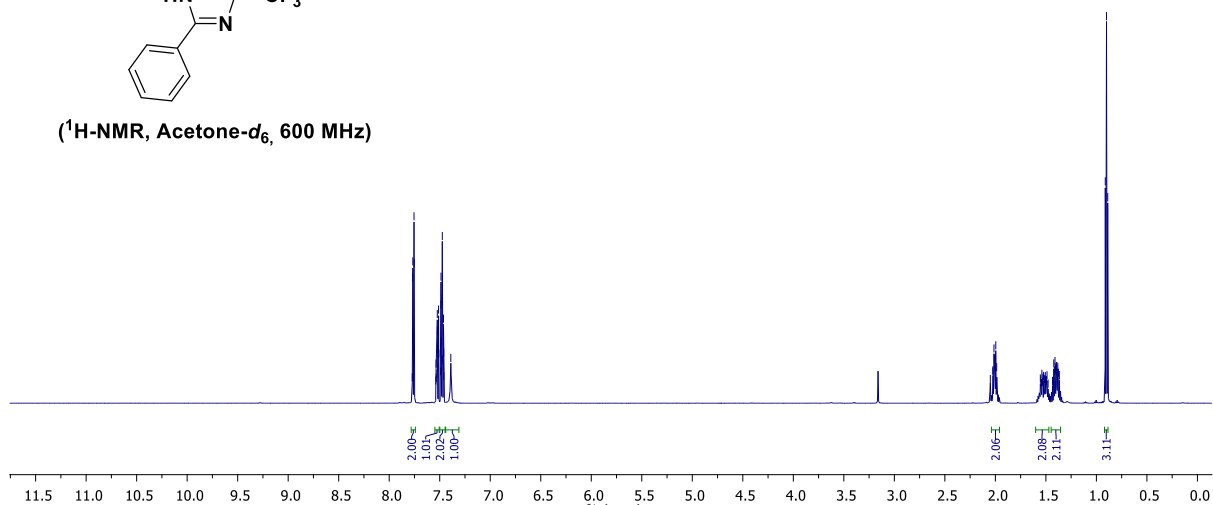



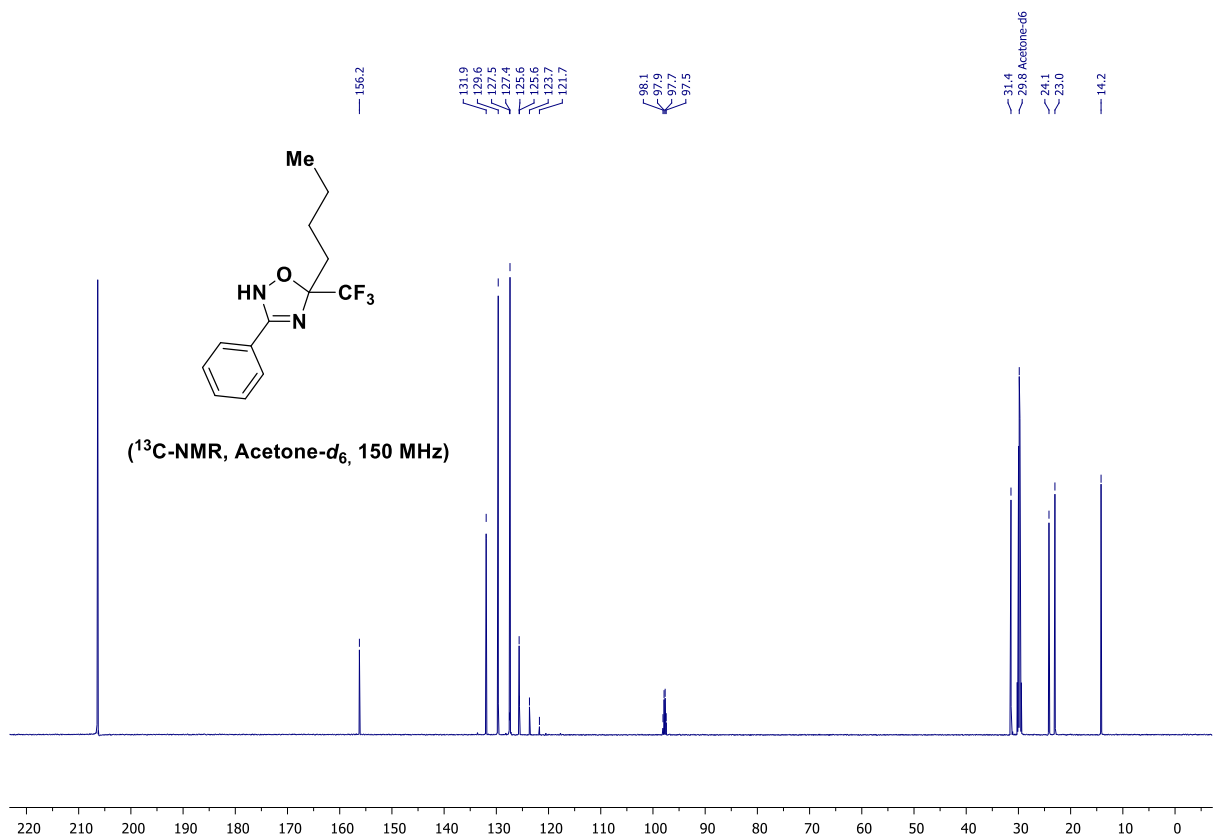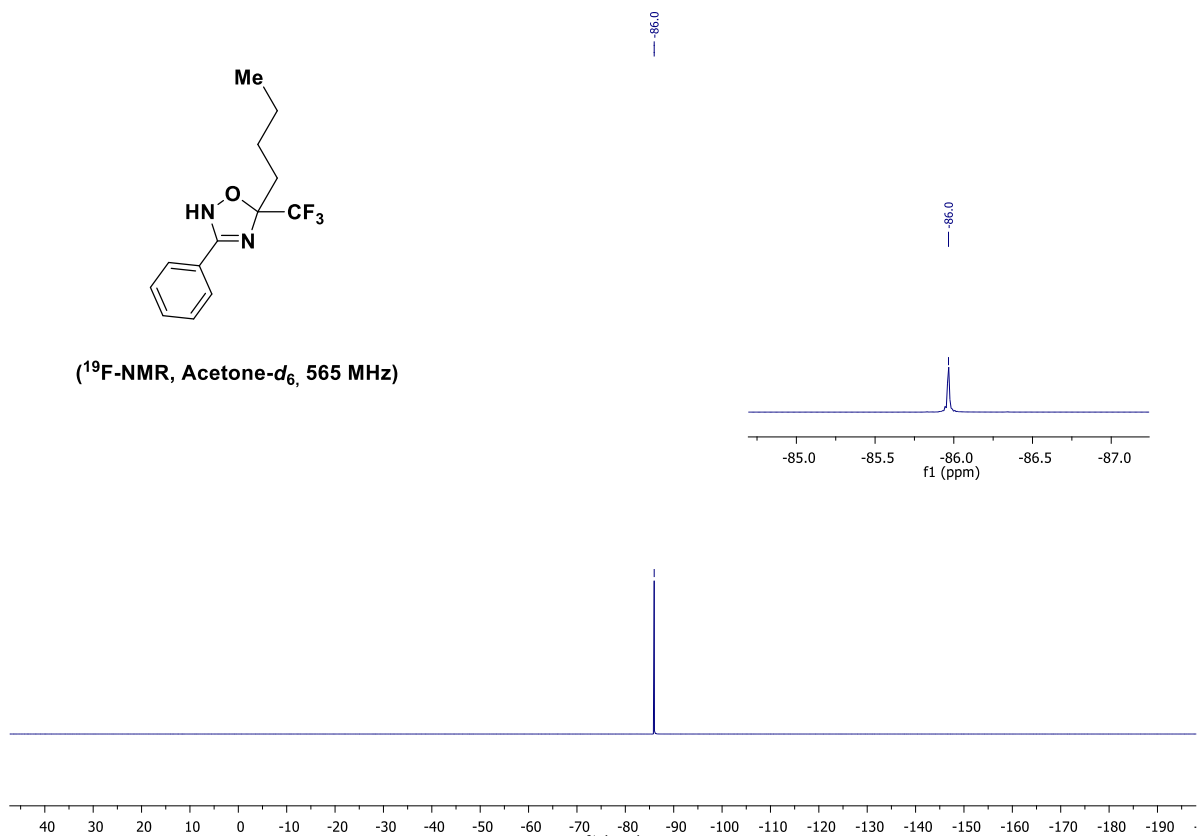



**5-(*sec*-butyl)-3-phenyl-5-(trifluoromethyl)-2,5-dihydro-1,2,4-oxadiazole (35)**

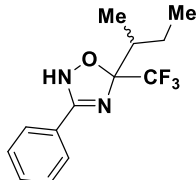

(<sup>13</sup>C-NMR, Acetone-*d*<sub>6</sub>, 100 MHz)

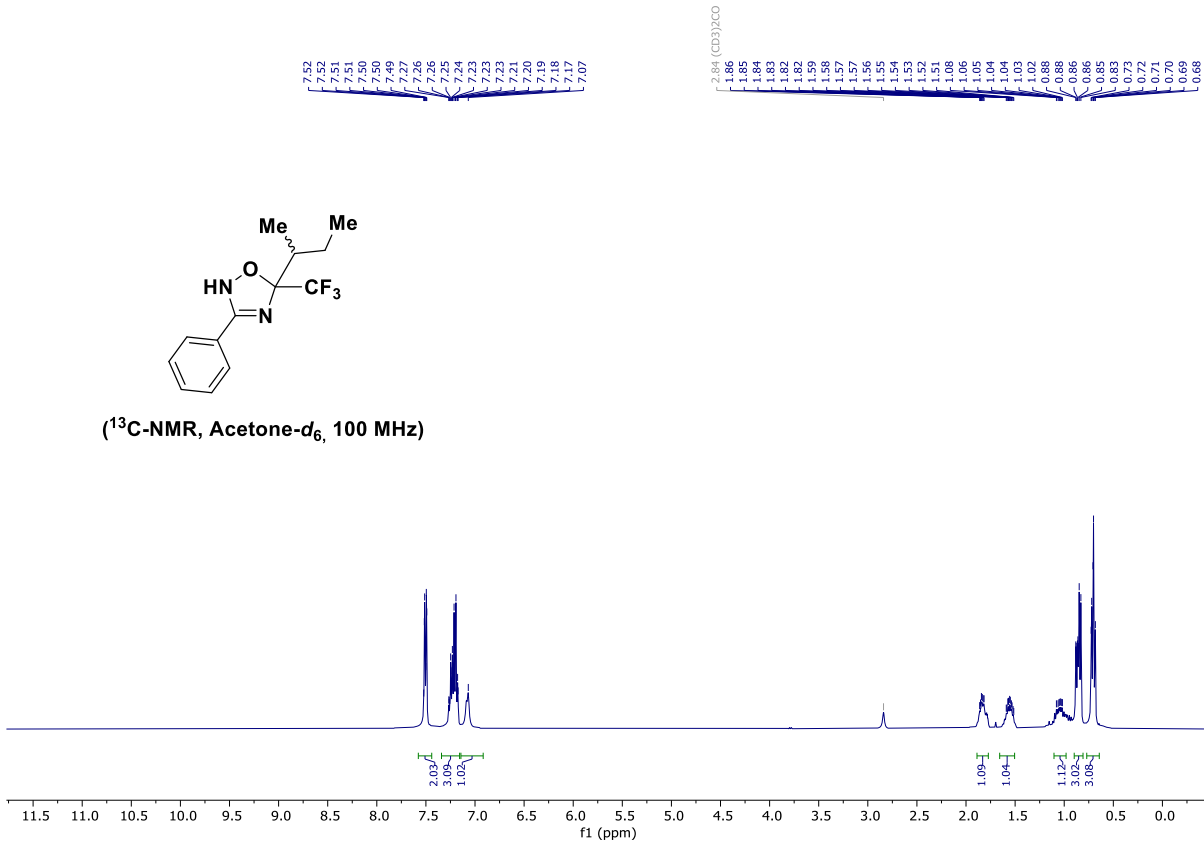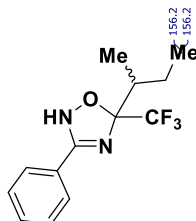

(<sup>13</sup>C-NMR, Acetone-*d*<sub>6</sub>, 100 MHz)

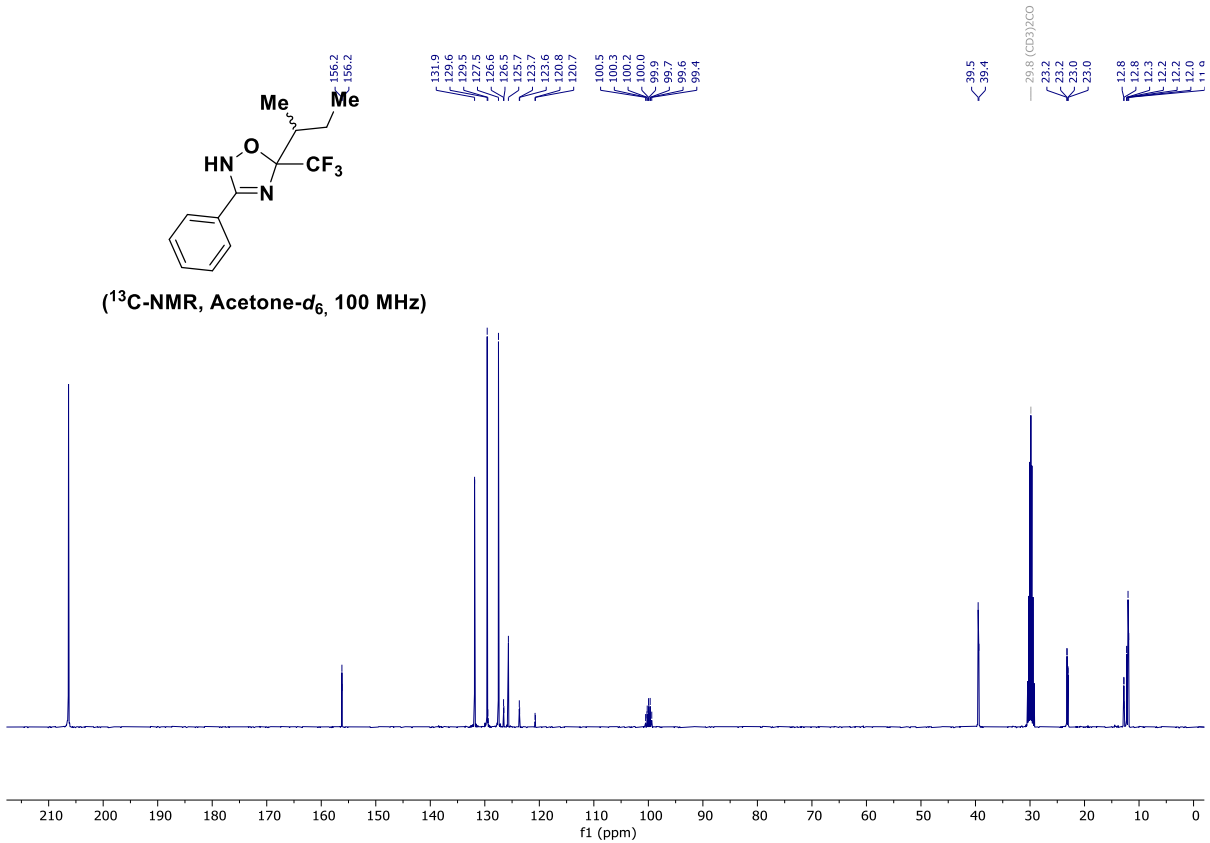



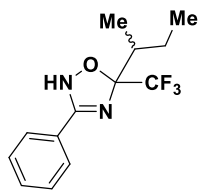

(<sup>19</sup>F-NMR, Acetone-*d*<sub>6</sub>, 377 MHz)

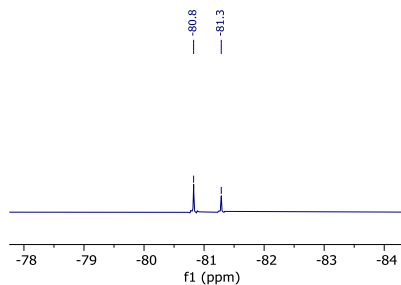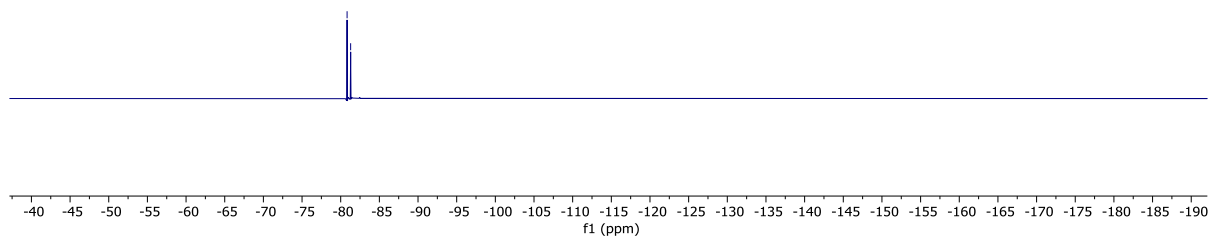

#### 4-(5-hexyl-5-(trifluoromethyl)-2,5-dihydro-1,2,4-oxadiazol-3-yl)-*N,N*-dimethylaniline (36)

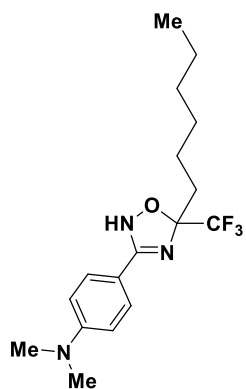

(<sup>1</sup>H-NMR, Acetone-*d*<sub>6</sub>, 600 MHz)

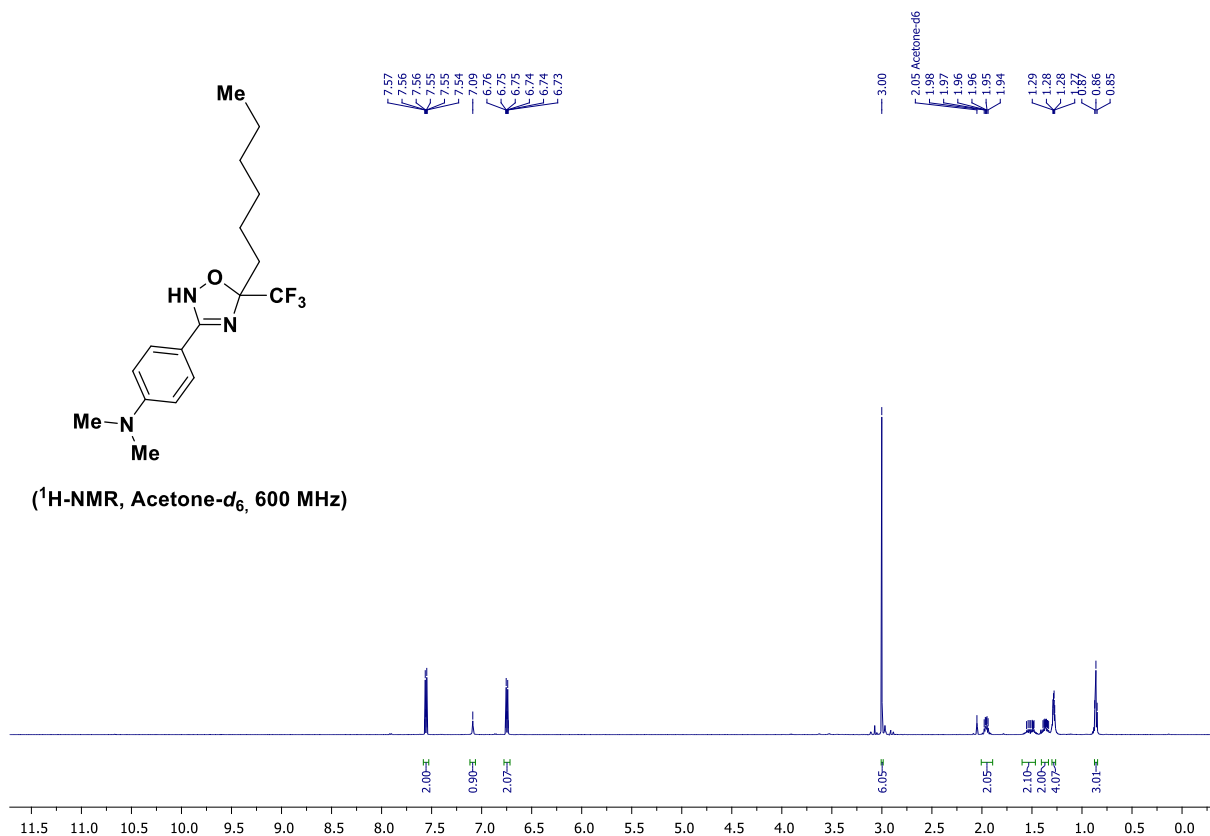



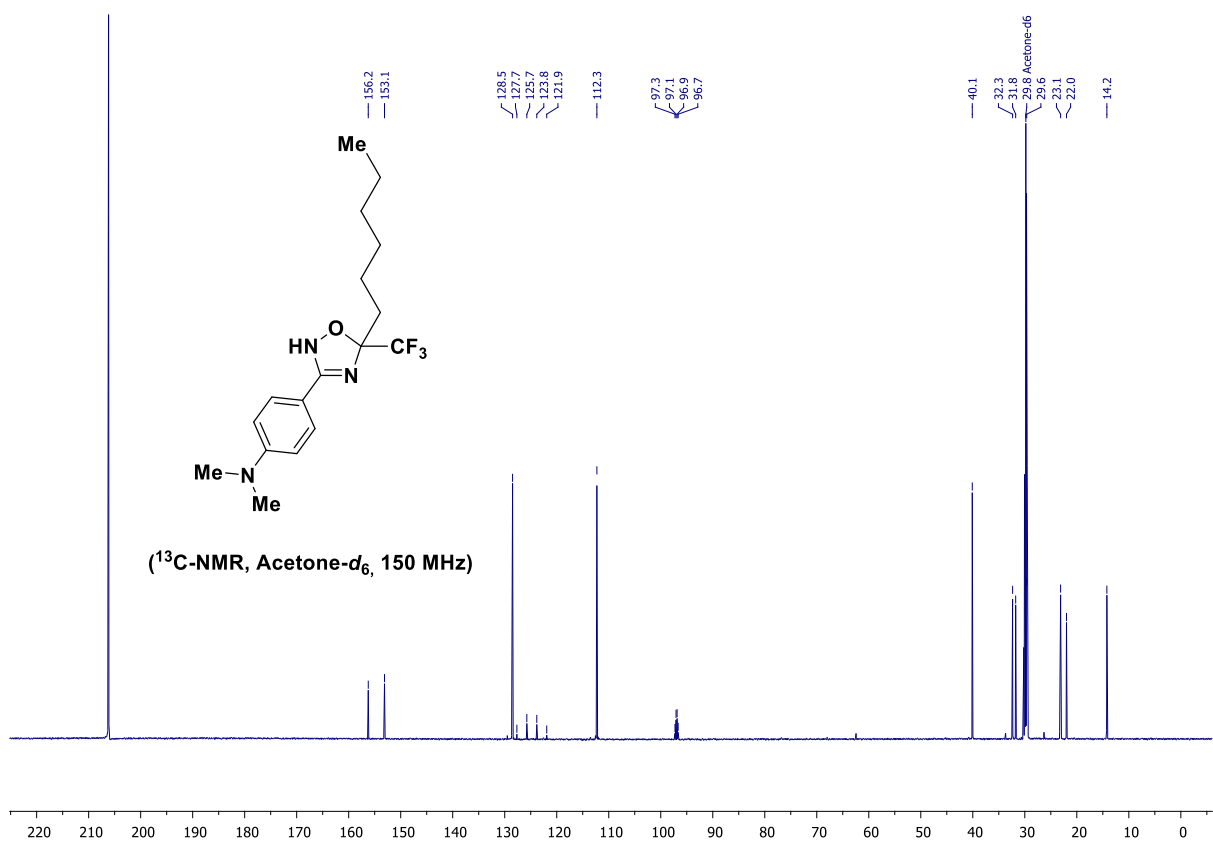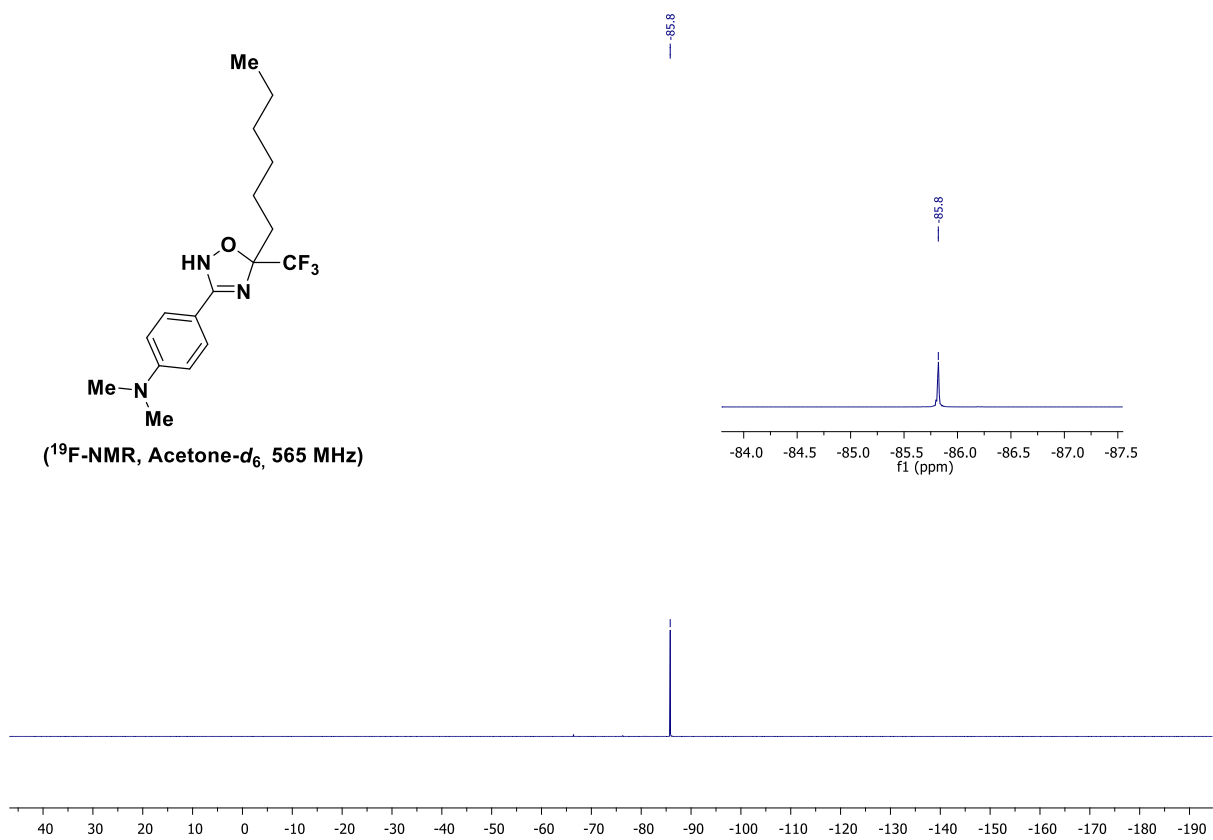



3,5-diphenyl-5-(trifluoromethyl)-2,5-dihydro-1,2,4-oxadiazole (37)

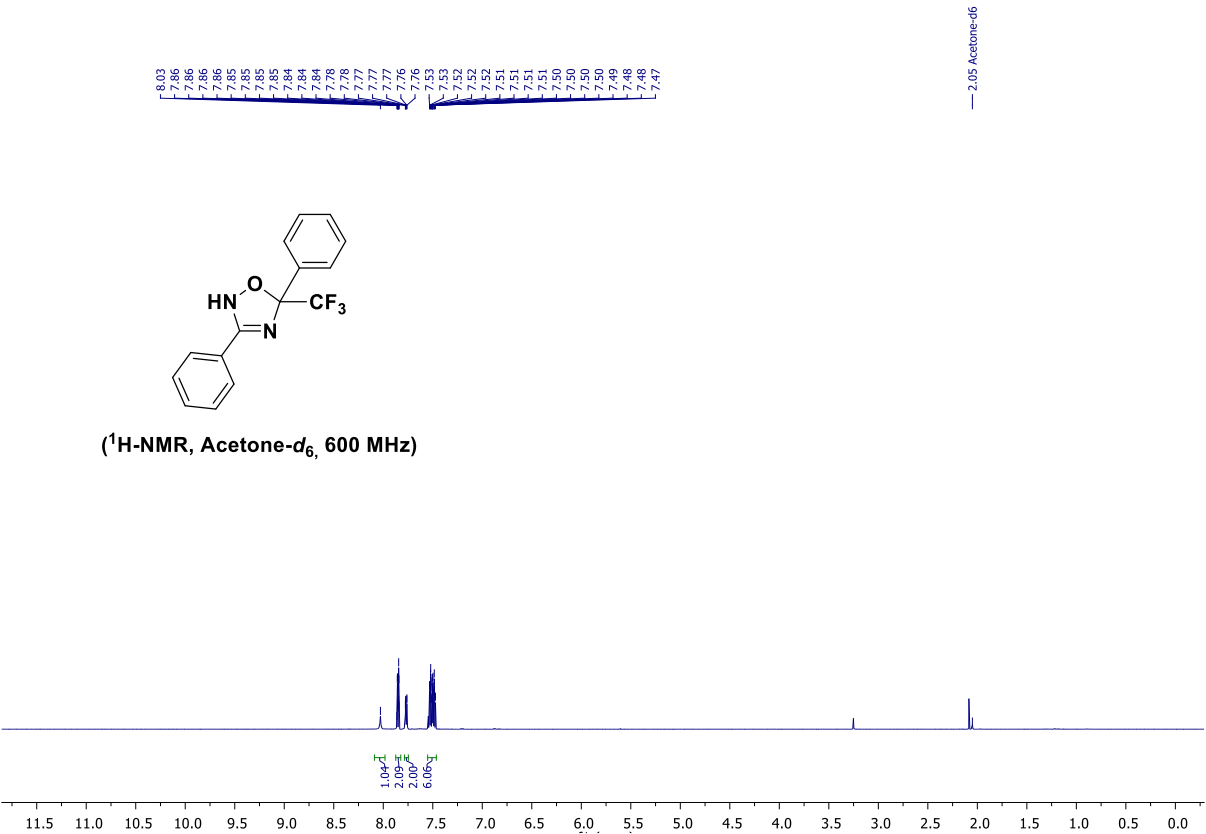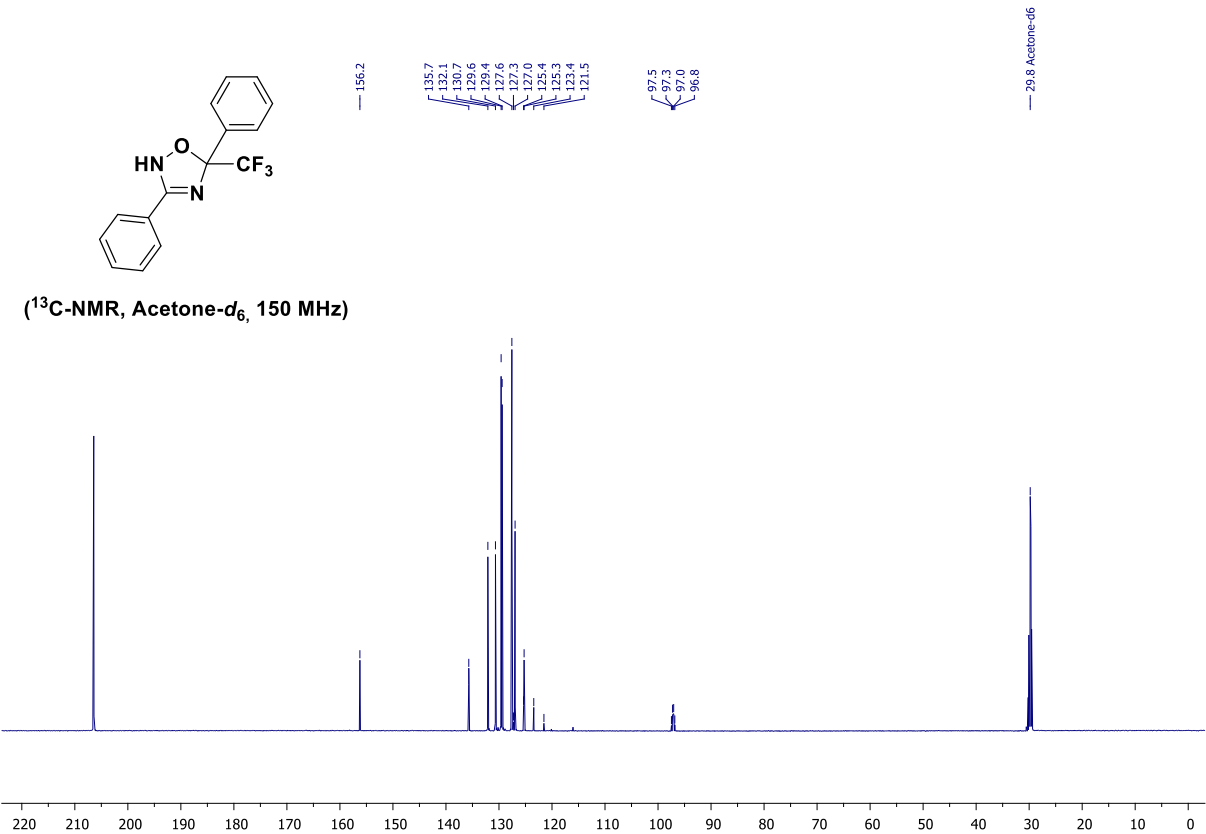



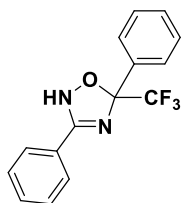

( $^{19}\text{F}$ -NMR, Acetone- $d_6$ , 565 MHz)

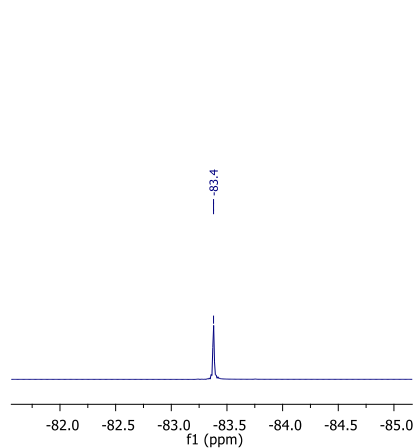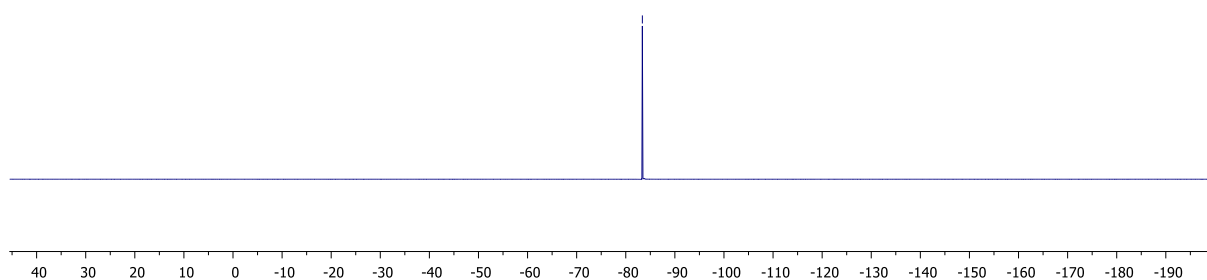

**3-phenyl-5-(thiophen-2-yl)-5-(trifluoromethyl)-2,5-dihydro-1,2,4-oxadiazole (38)**

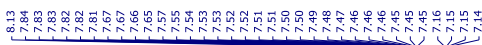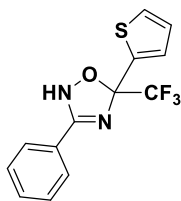

( $^1\text{H}$ -NMR, Acetone- $d_6$ , 400 MHz)

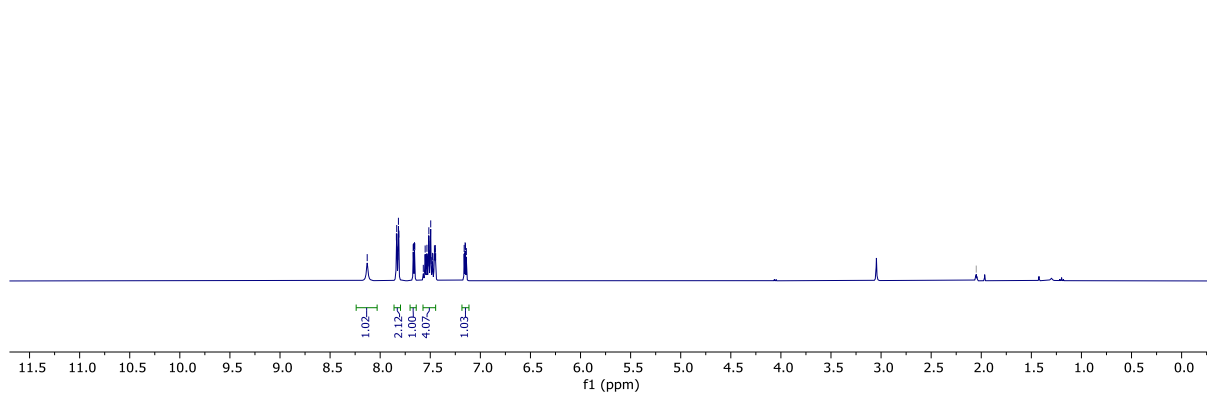



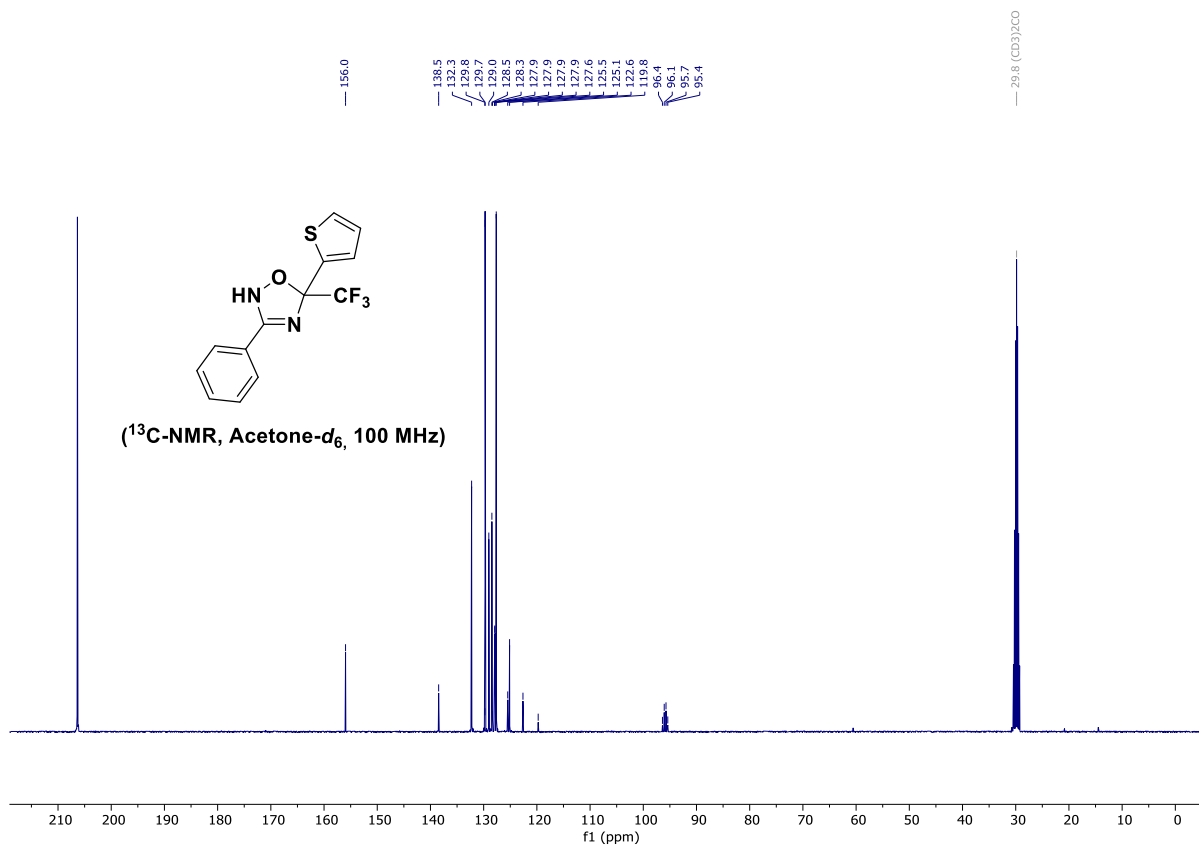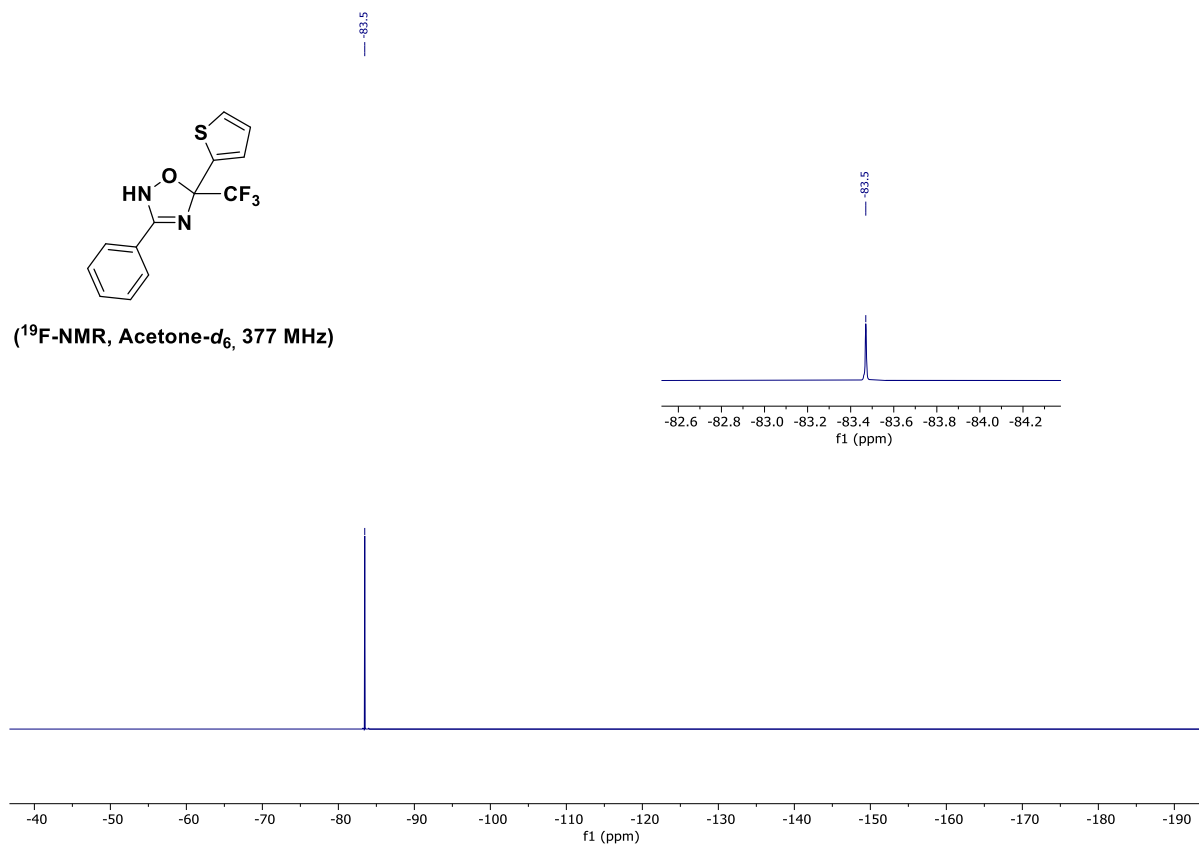



***N,N*-dimethyl-4-(5-methyl-5-(trifluoromethyl)-2,5-dihydro-1,2,4-oxadiazol-3-yl)aniline (39)**

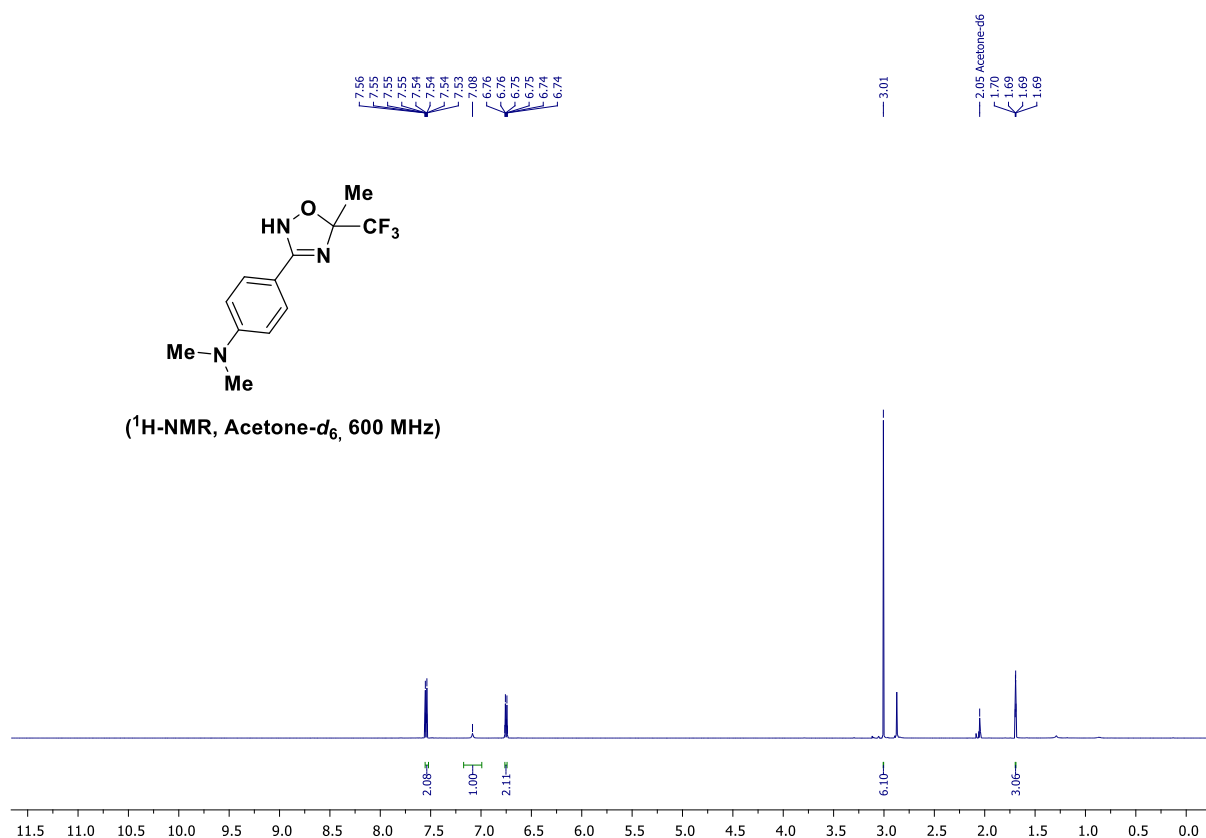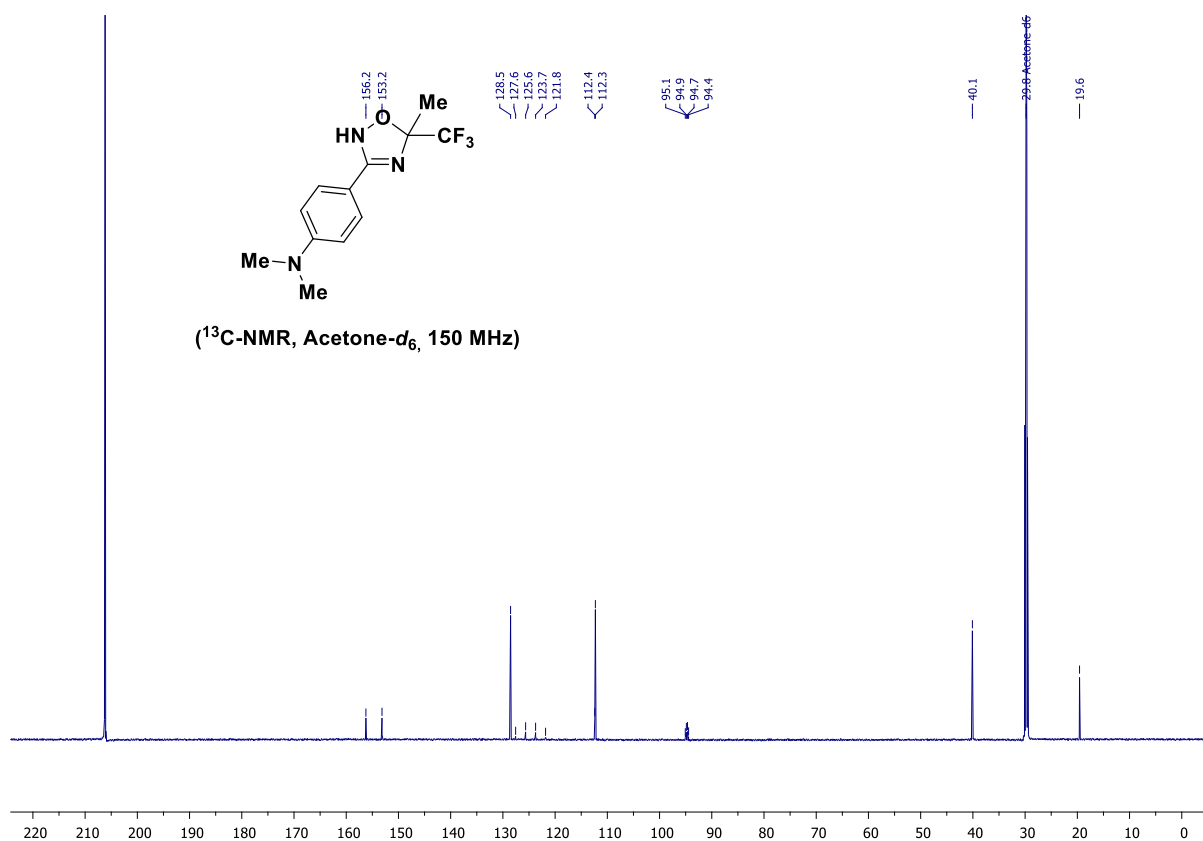



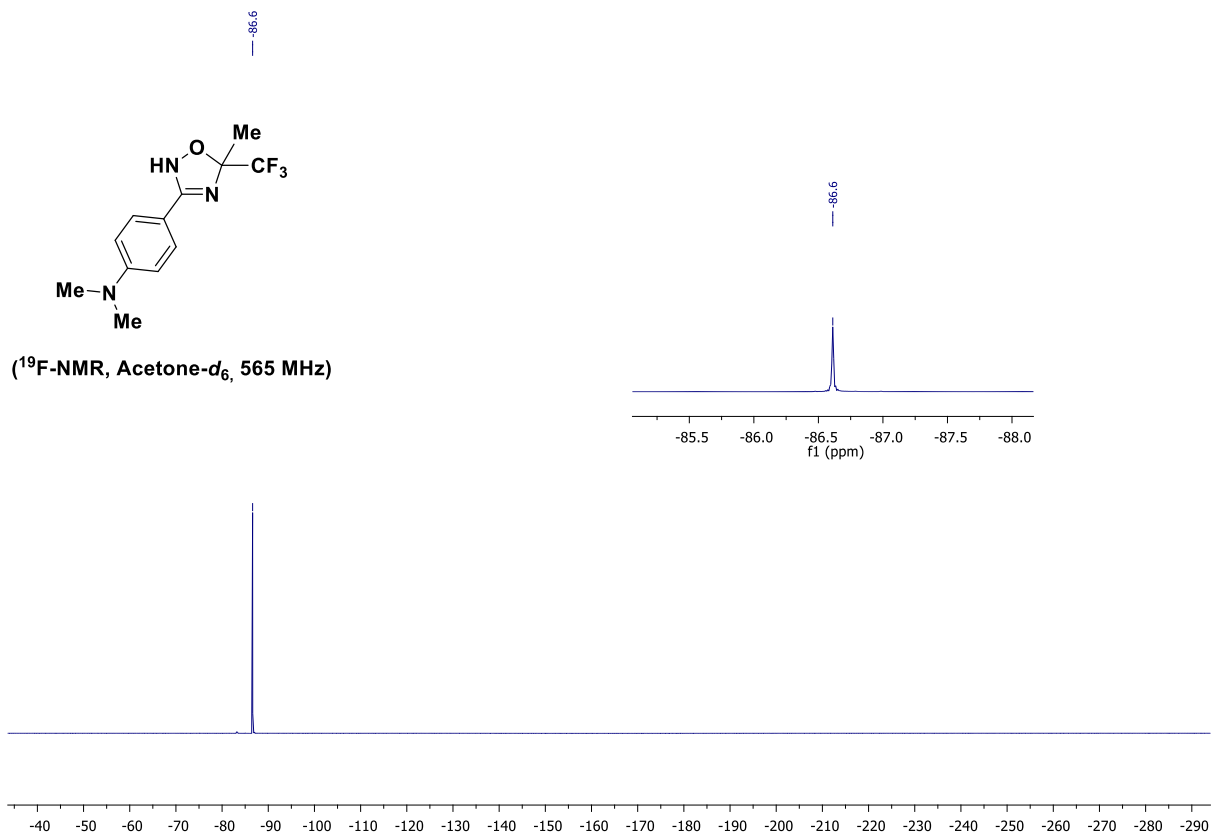

**3-(4-methoxyphenyl)-5-ethyl-5-(trifluoromethyl)-2,5-dihydro-1,2,4-oxadiazole (40)**

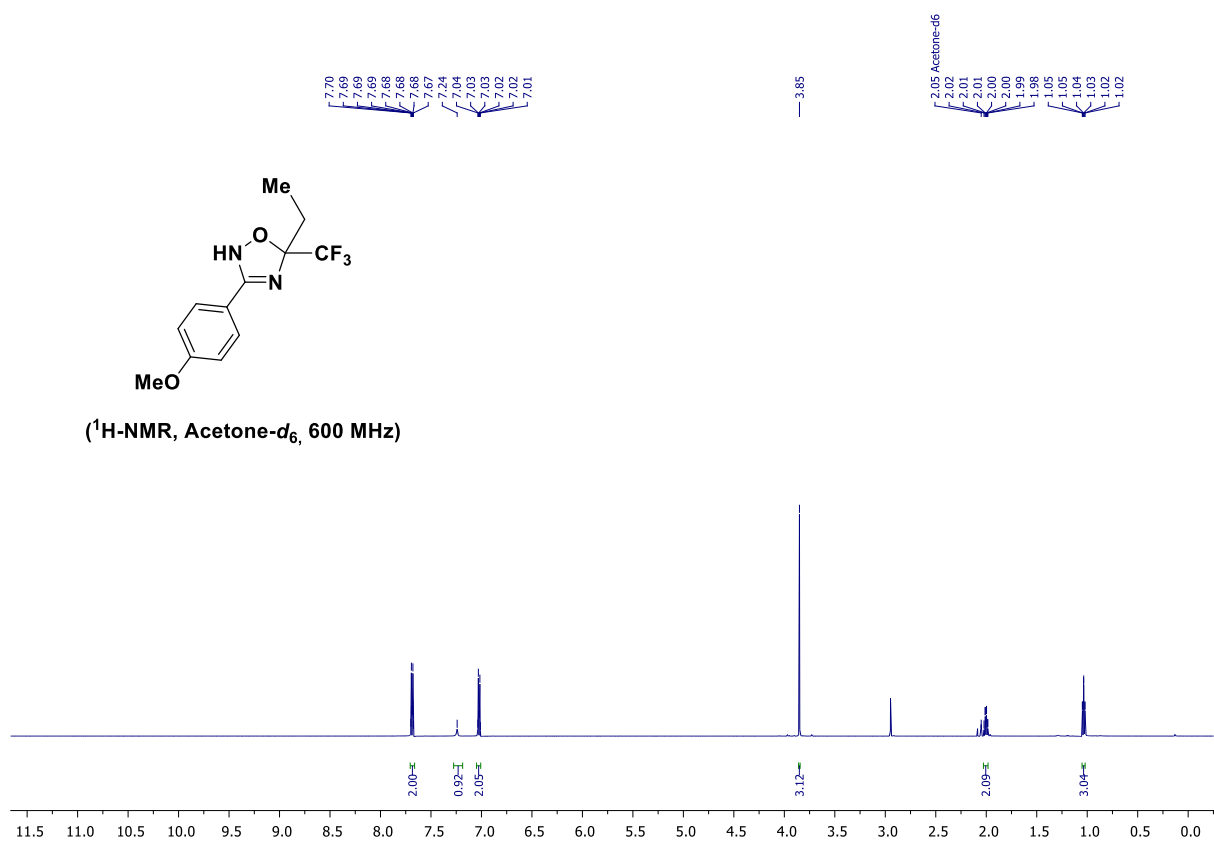



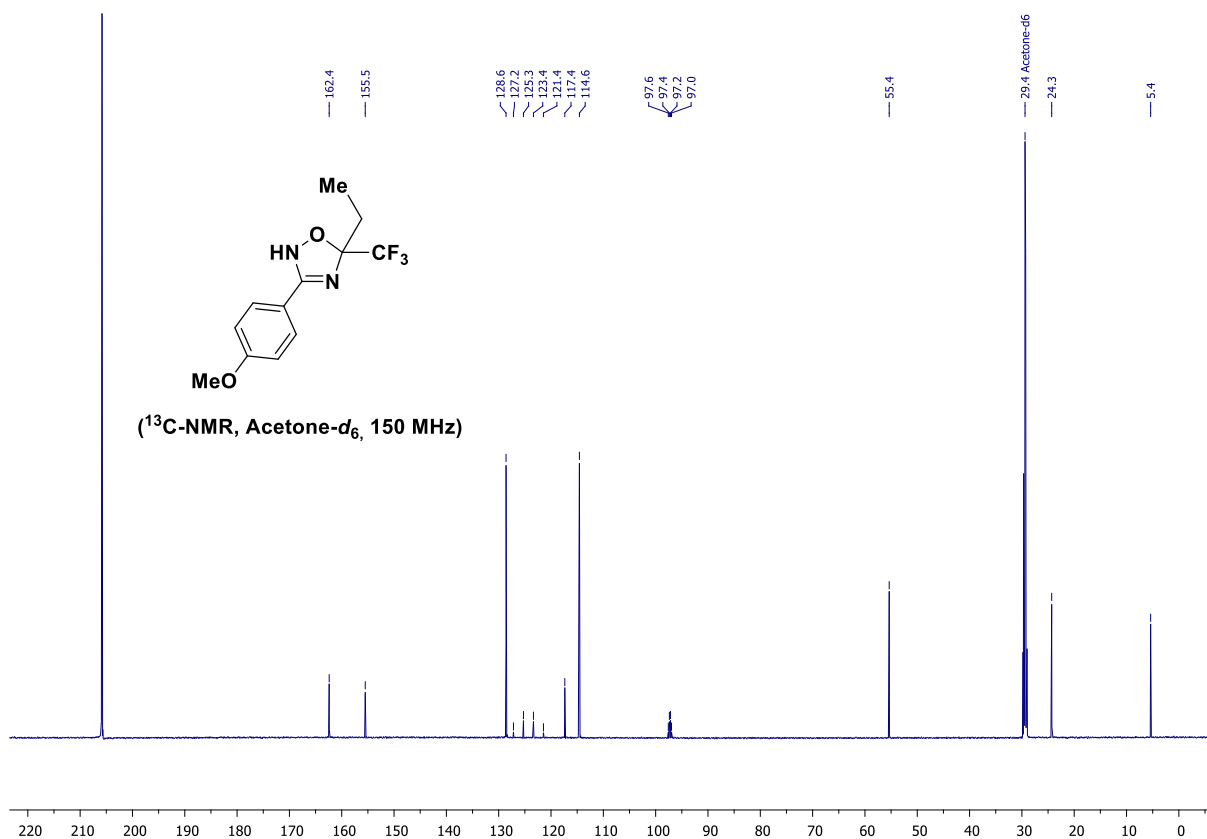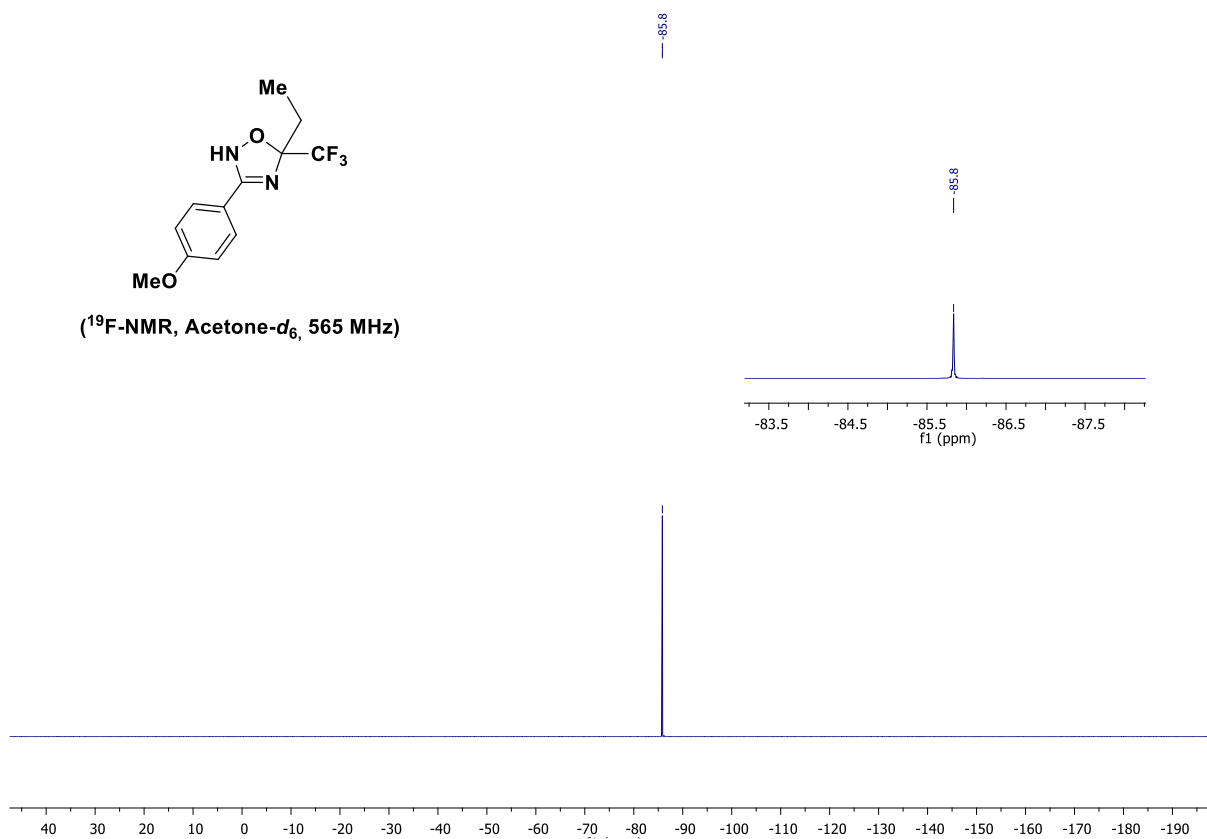



5-benzyl-3-(4-methoxyphenyl)-5-(trifluoromethyl)-2,5-dihydro-1,2,4-oxadiazole (41)

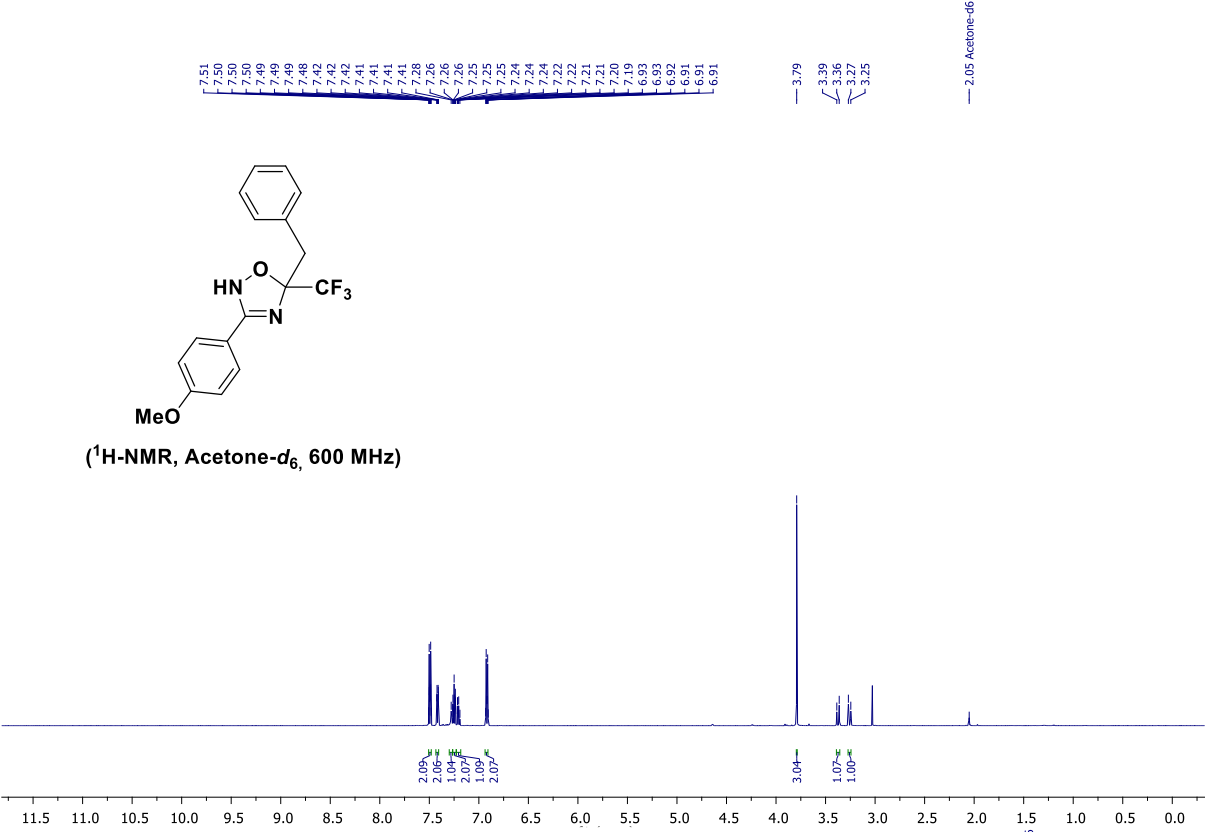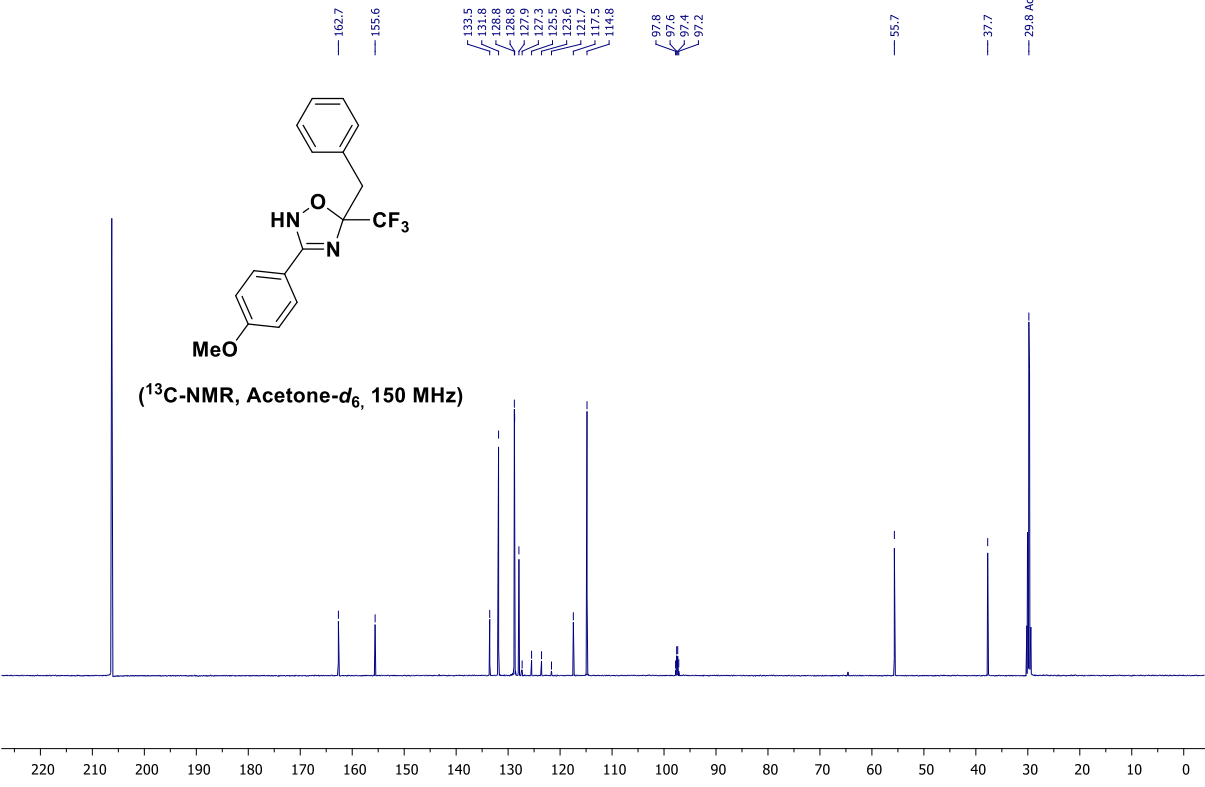



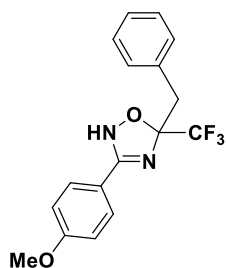

( $^{19}\text{F}$ -NMR, Acetone- $d_6$ , 565 MHz)

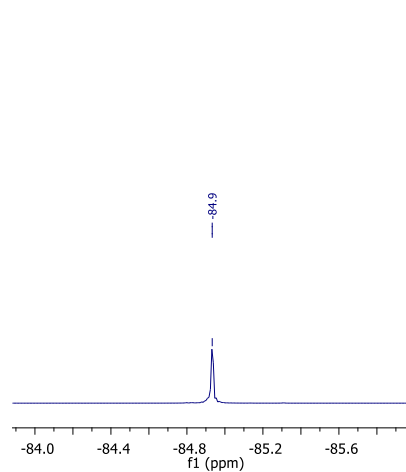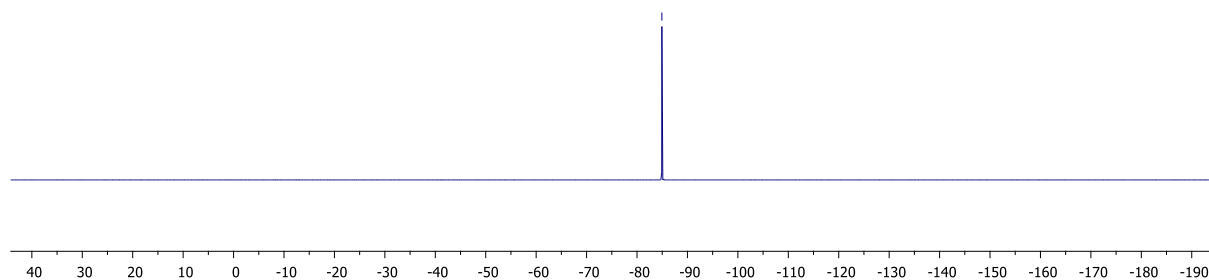

4-methyl-3-phenyl-5-(trifluoromethyl)-5-((trimethylsilyl)methyl)-4,5-dihydro-1,2,4-oxadiazole (42)

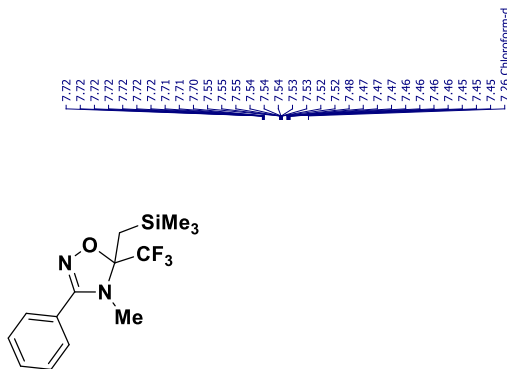

( $^1\text{H}$ -NMR,  $\text{CDCl}_3$ , 600 MHz)

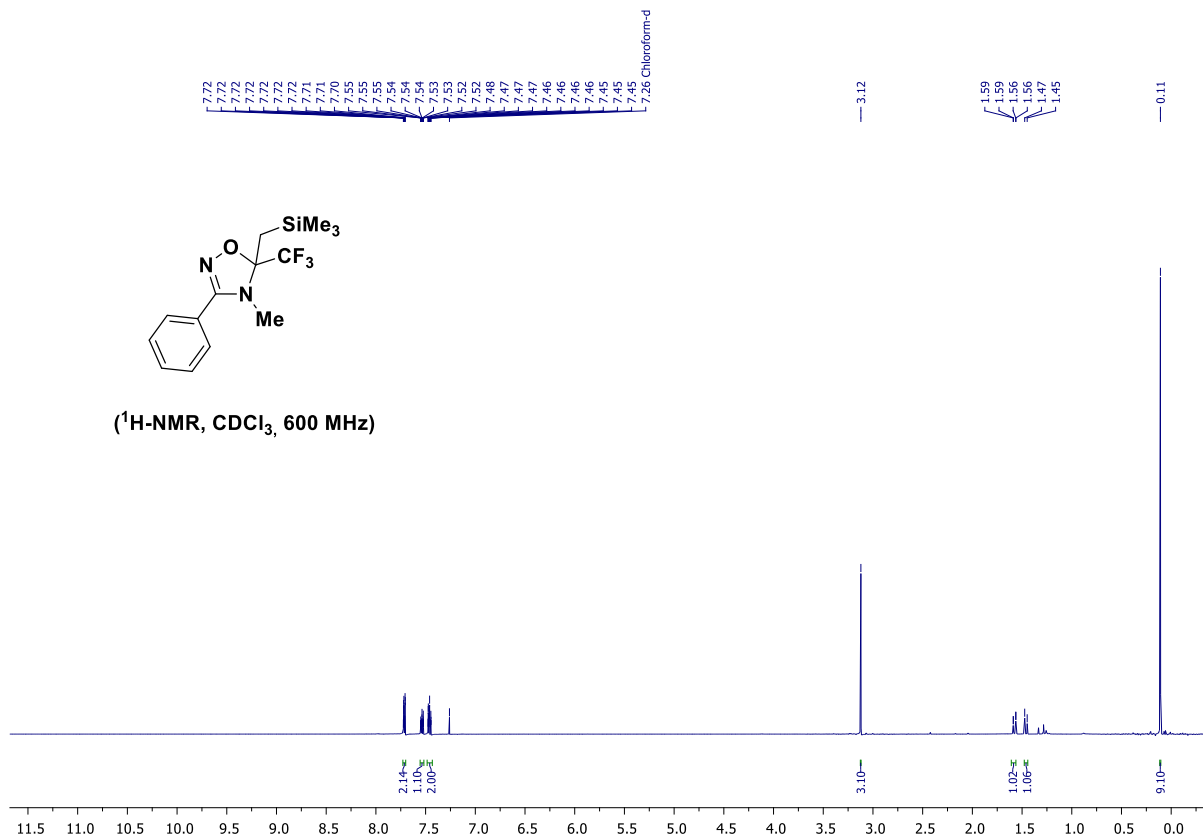



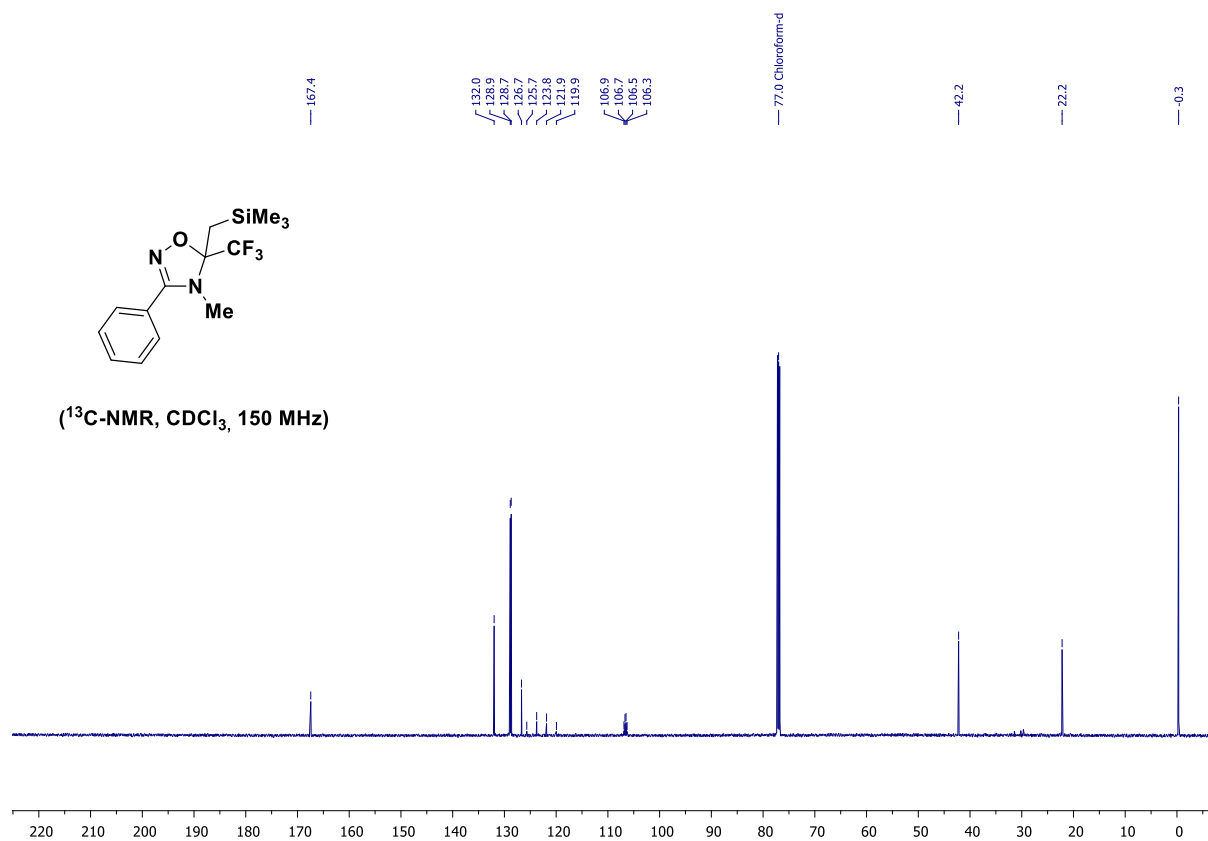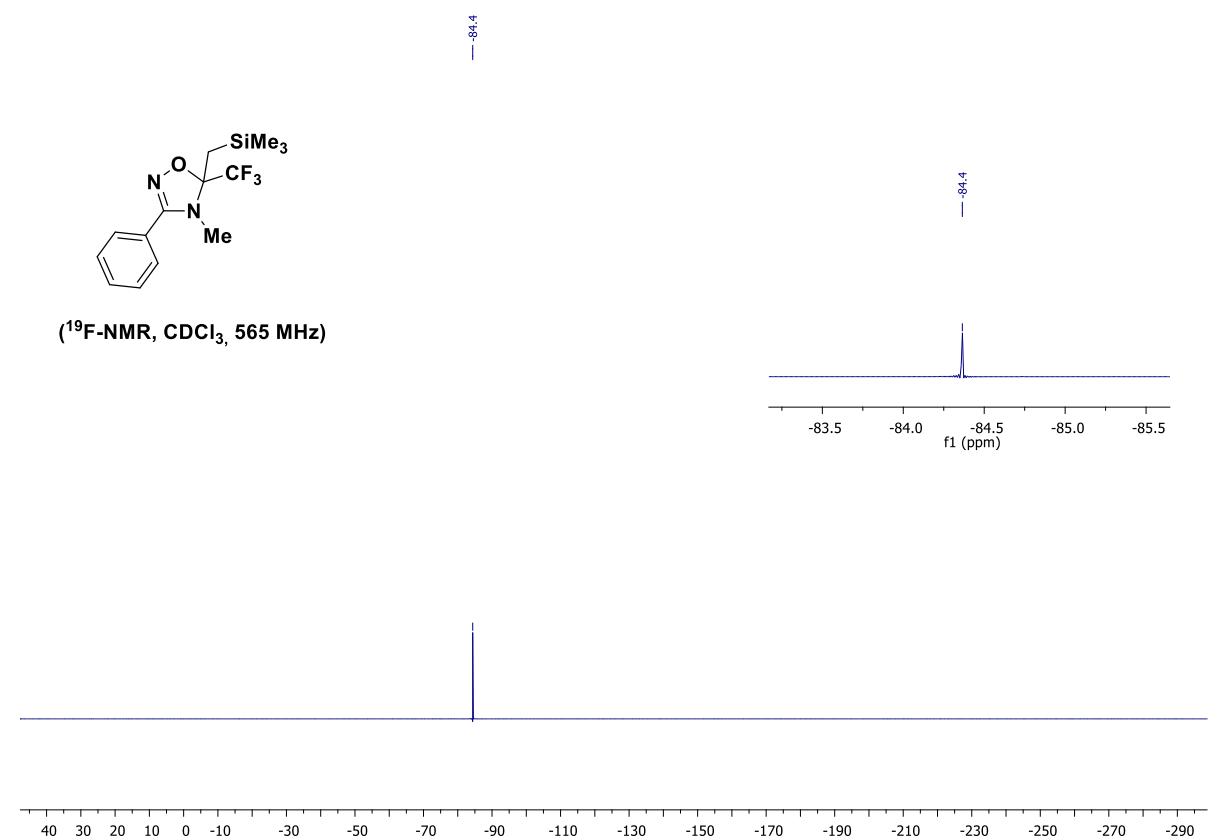



1-(5-butyl-3-phenyl-5-(trifluoromethyl)-1,2,4-oxadiazol-2(5H)-yl)ethan-1-one (43)

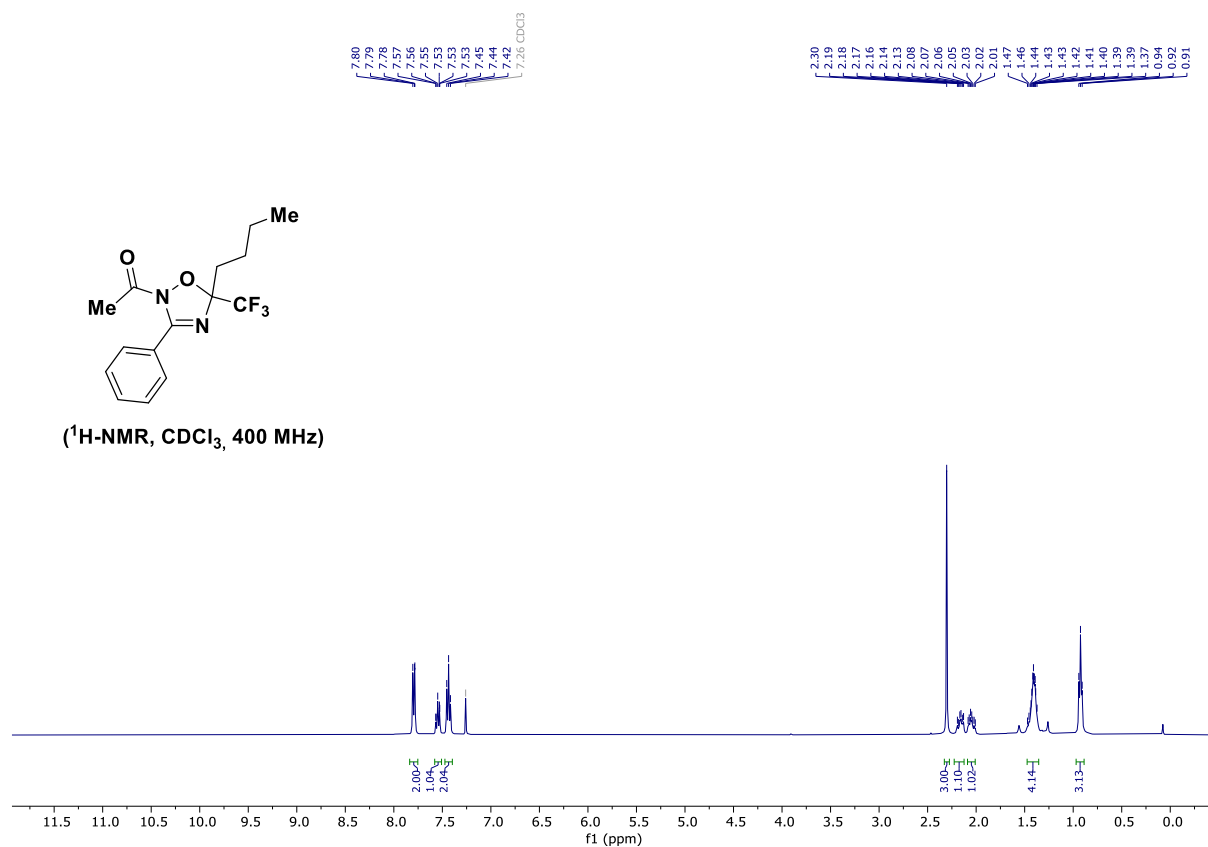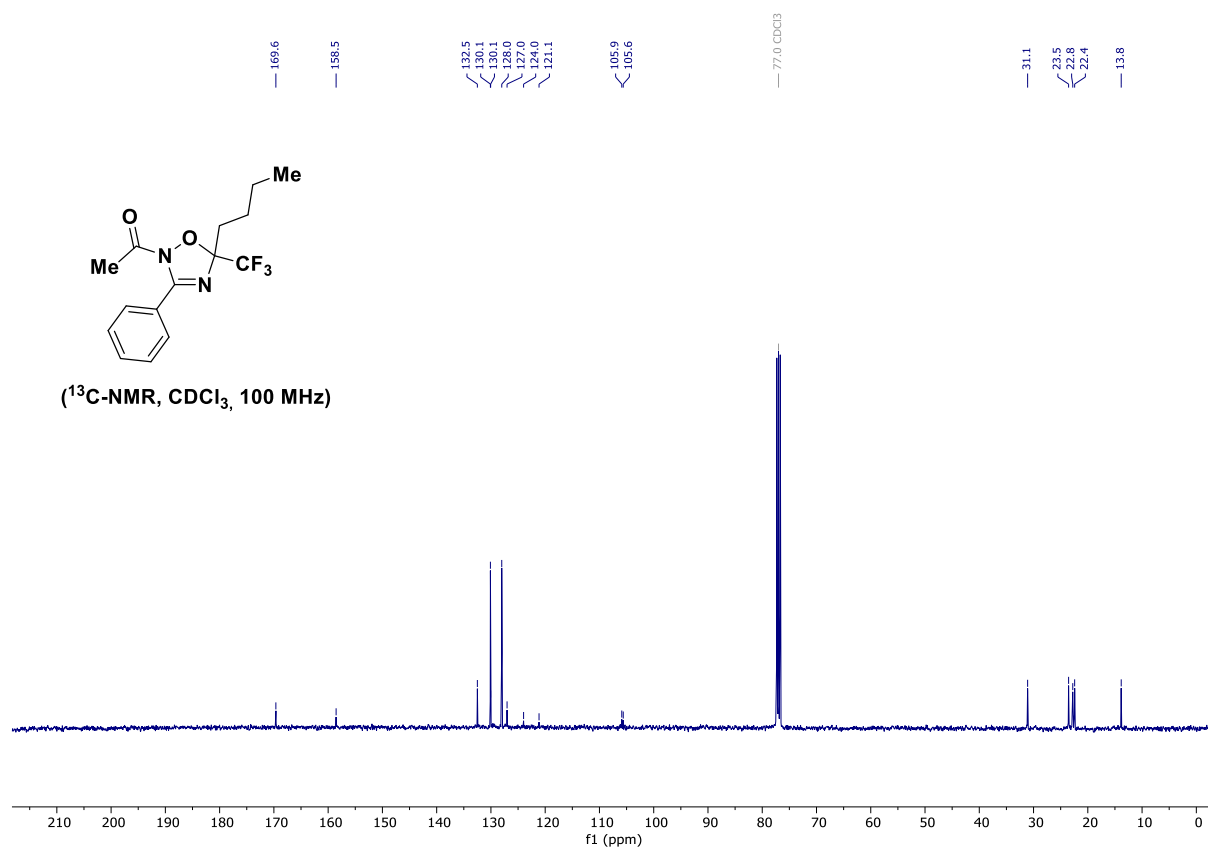



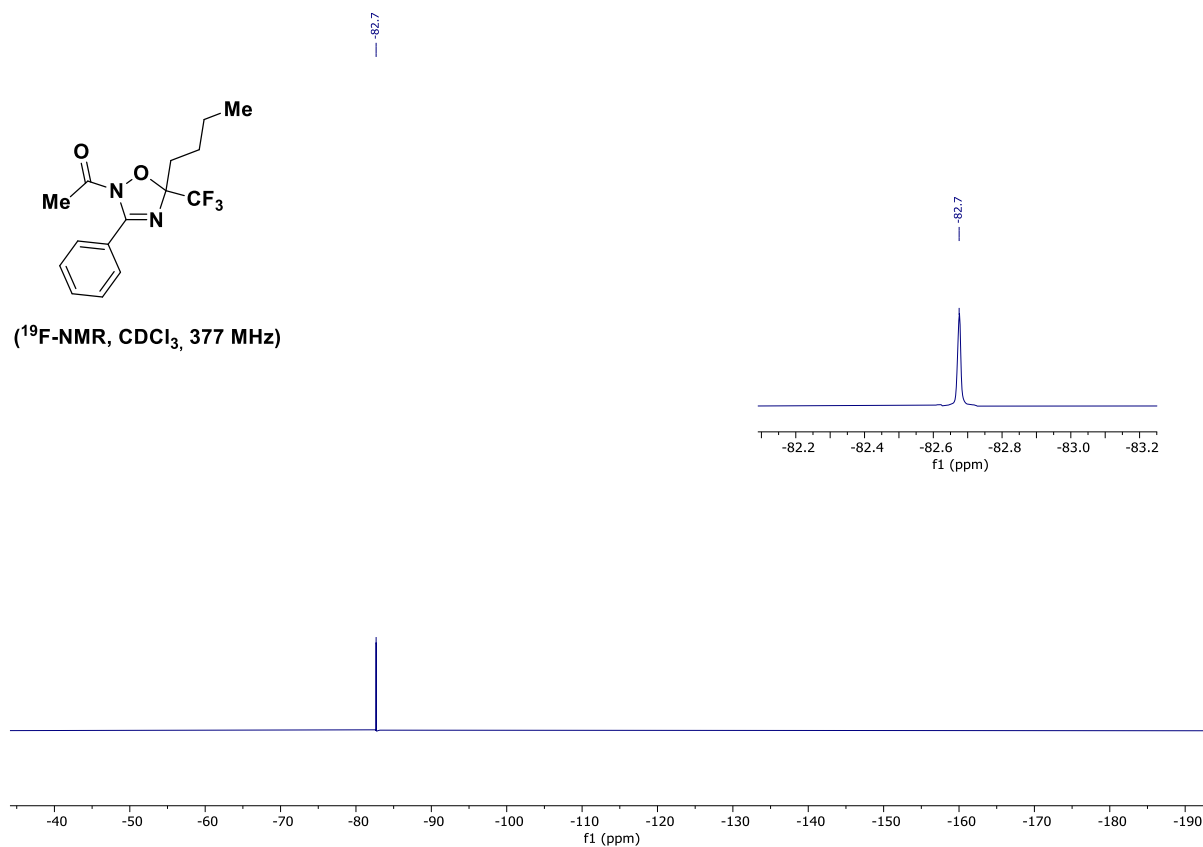

**5-(chloromethyl)-3-phenyl-5-(trifluoromethyl)-2,5-dihydro-1,2,4-oxadiazole (44)**

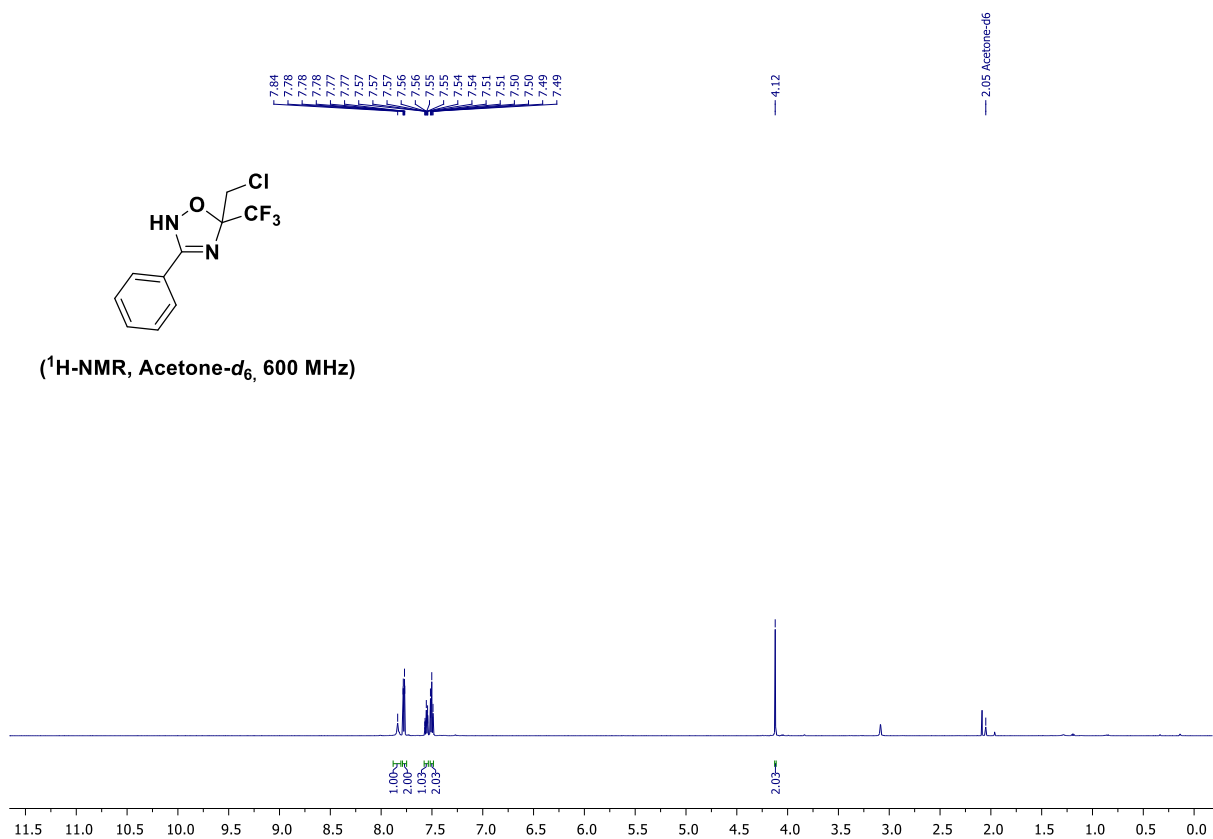



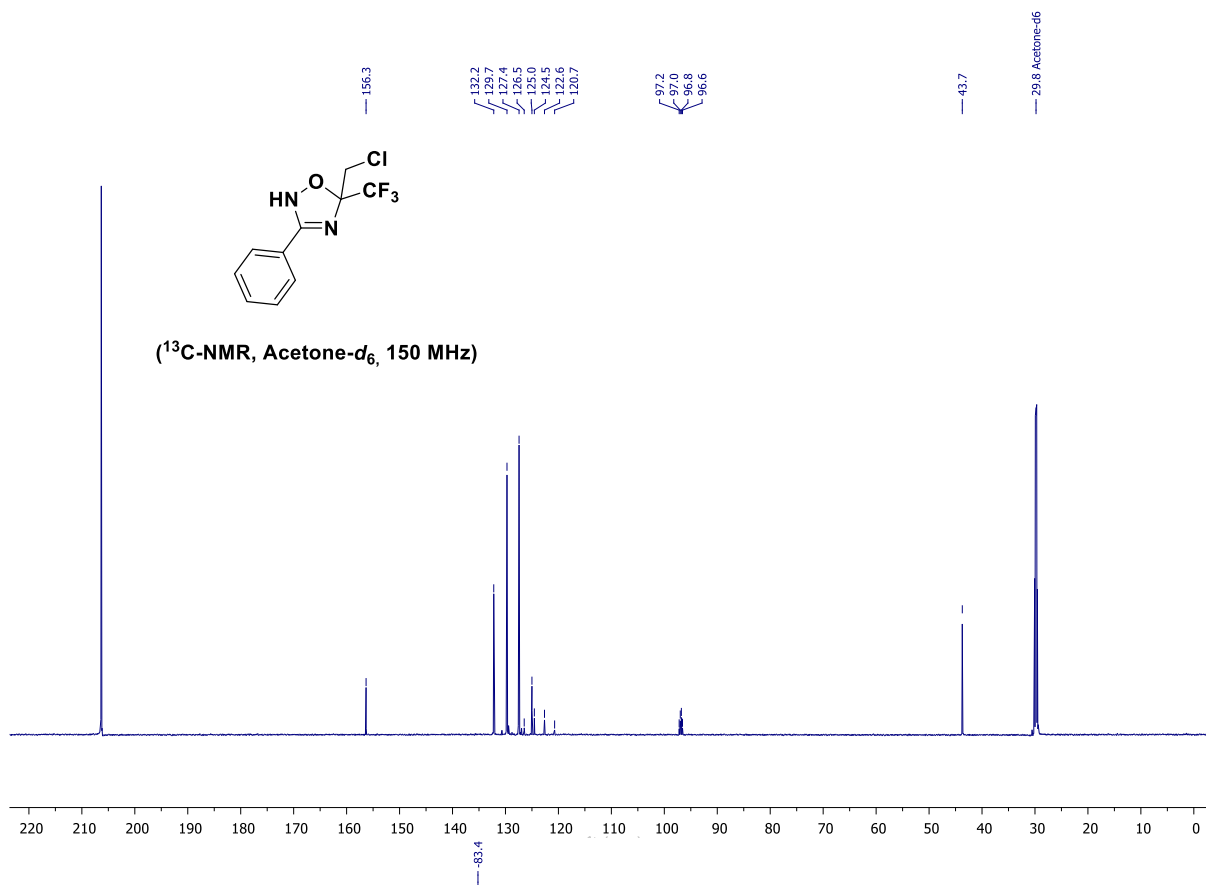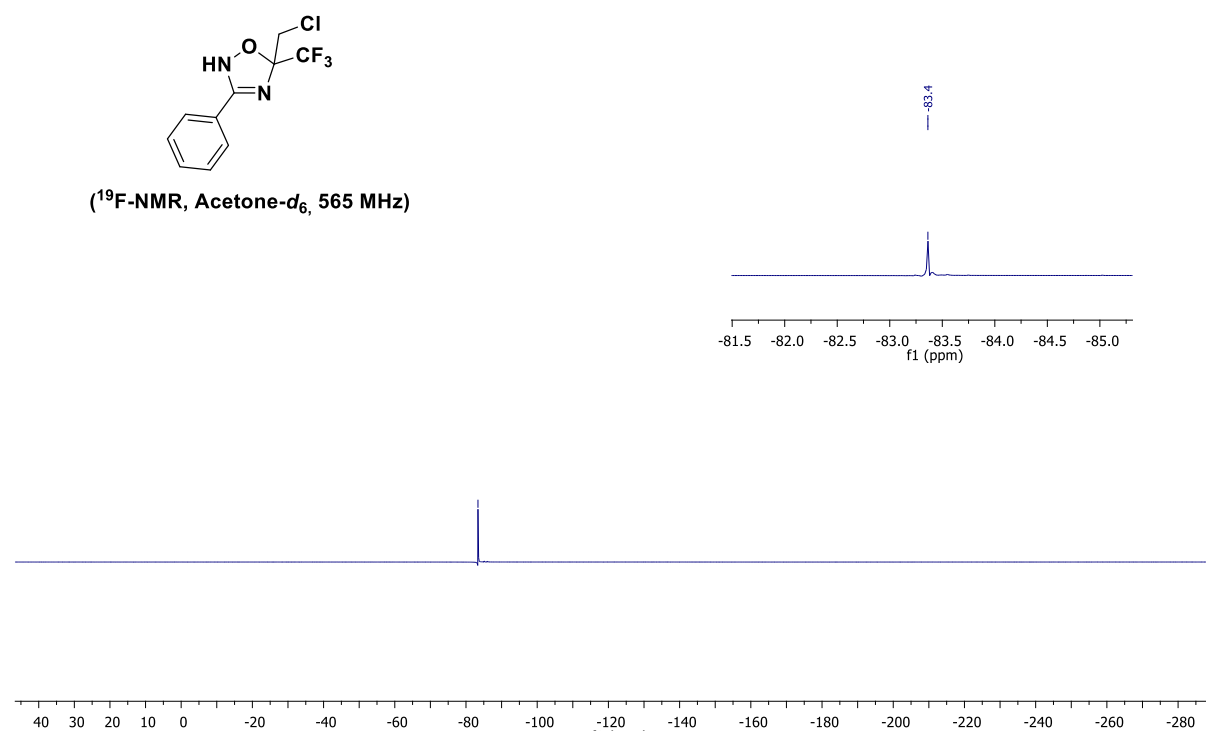



5-(chloromethyl)-3-(thiophen-2-yl)-5-(trifluoromethyl)-2,5-dihydro-1,2,4-oxadiazole (45)

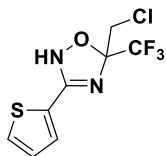

(<sup>1</sup>H-NMR, Acetone-*d*<sub>6</sub>, 600 MHz)

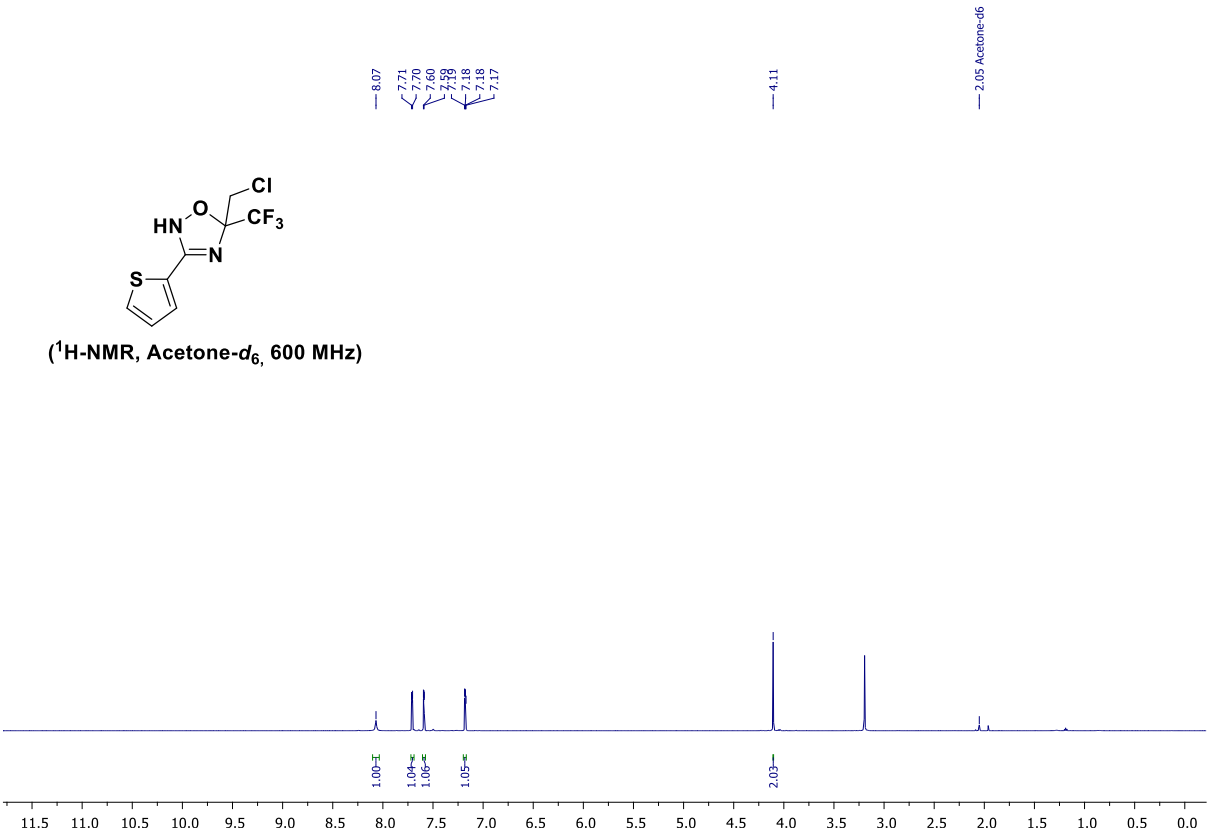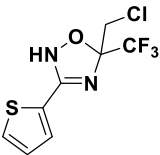

(<sup>13</sup>C-NMR, Acetone-*d*<sub>6</sub>, 150 MHz)

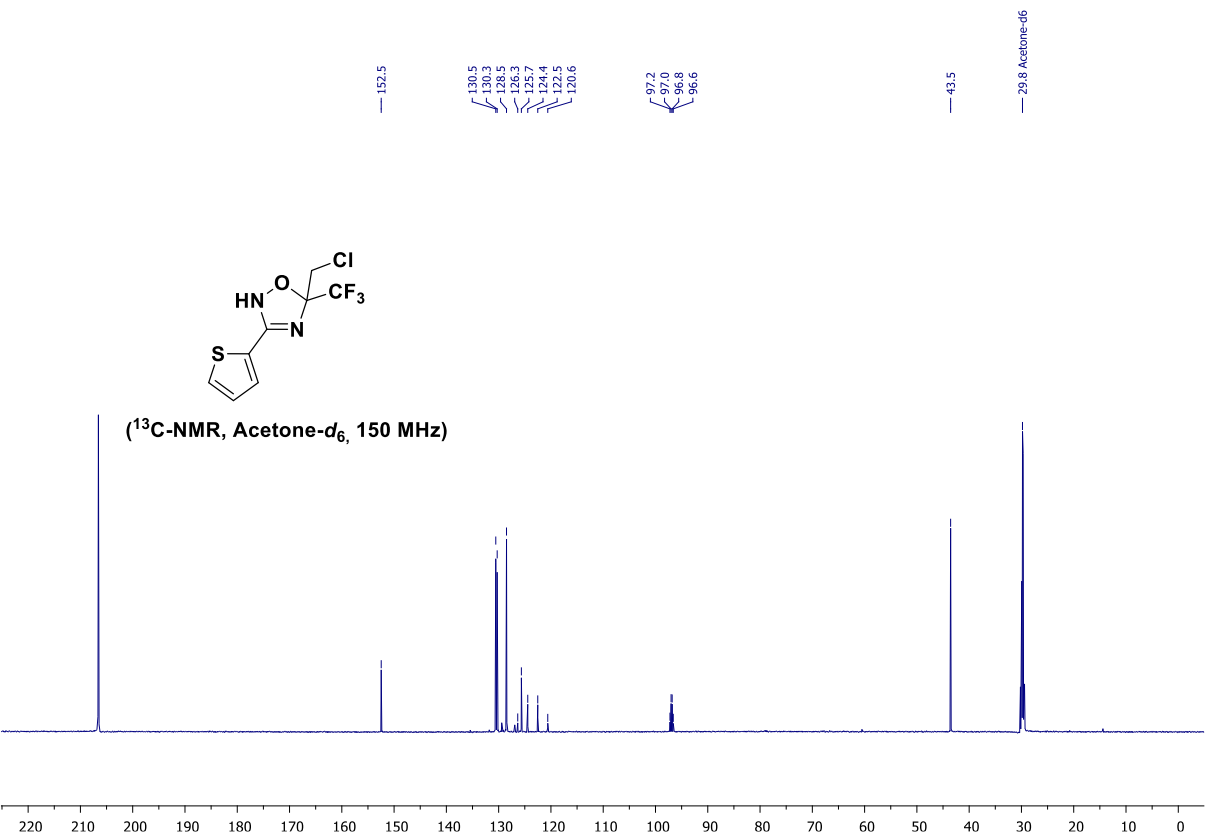



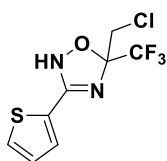

( $^{19}\text{F}$ -NMR, Acetone- $d_6$ , 565 MHz)

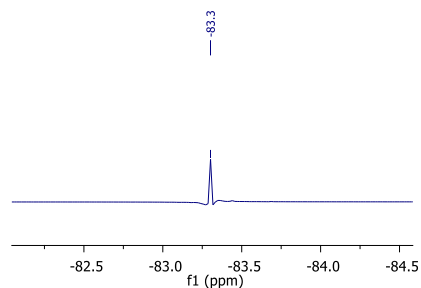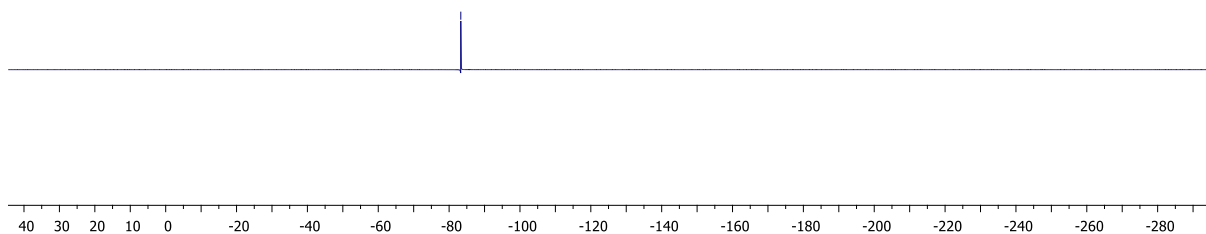

2-benzyl-5-(chloromethyl)-3-(4-chlorophenyl)-5-(trifluoromethyl)-2,5-dihydro-1,2,4-oxadiazole (46)

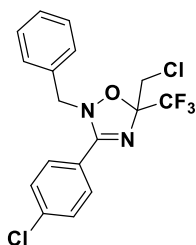

( $^1\text{H}$ -NMR,  $\text{CDCl}_3$ , 600 MHz)

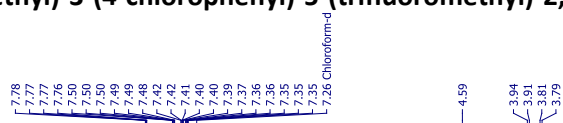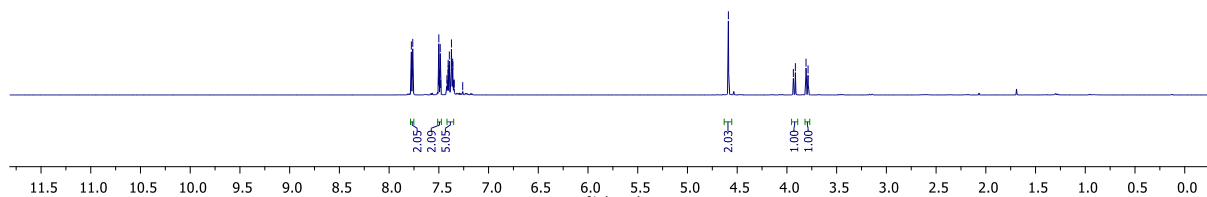



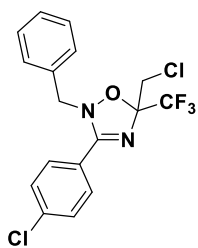

(<sup>13</sup>C-NMR, CDCl<sub>3</sub>, 150 MHz)

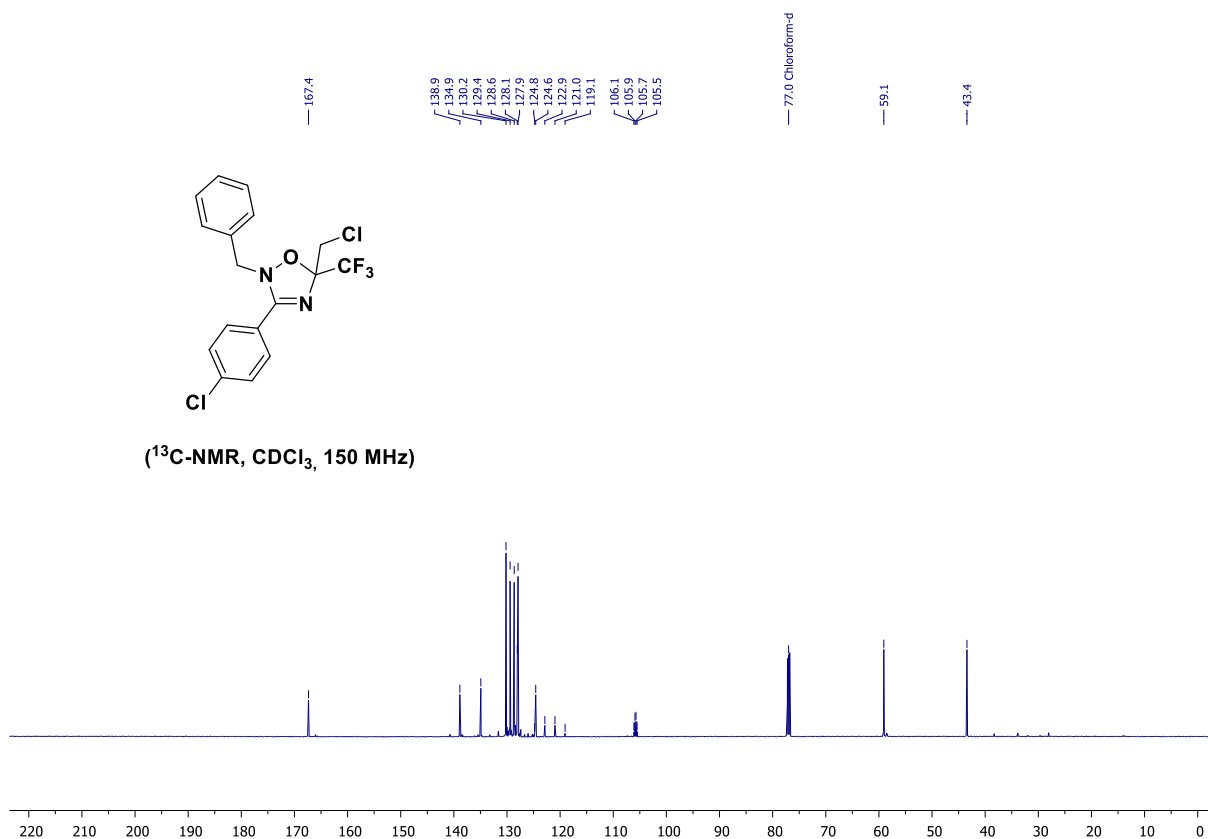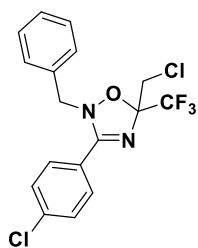

(<sup>19</sup>F-NMR, CDCl<sub>3</sub>, 565 MHz)

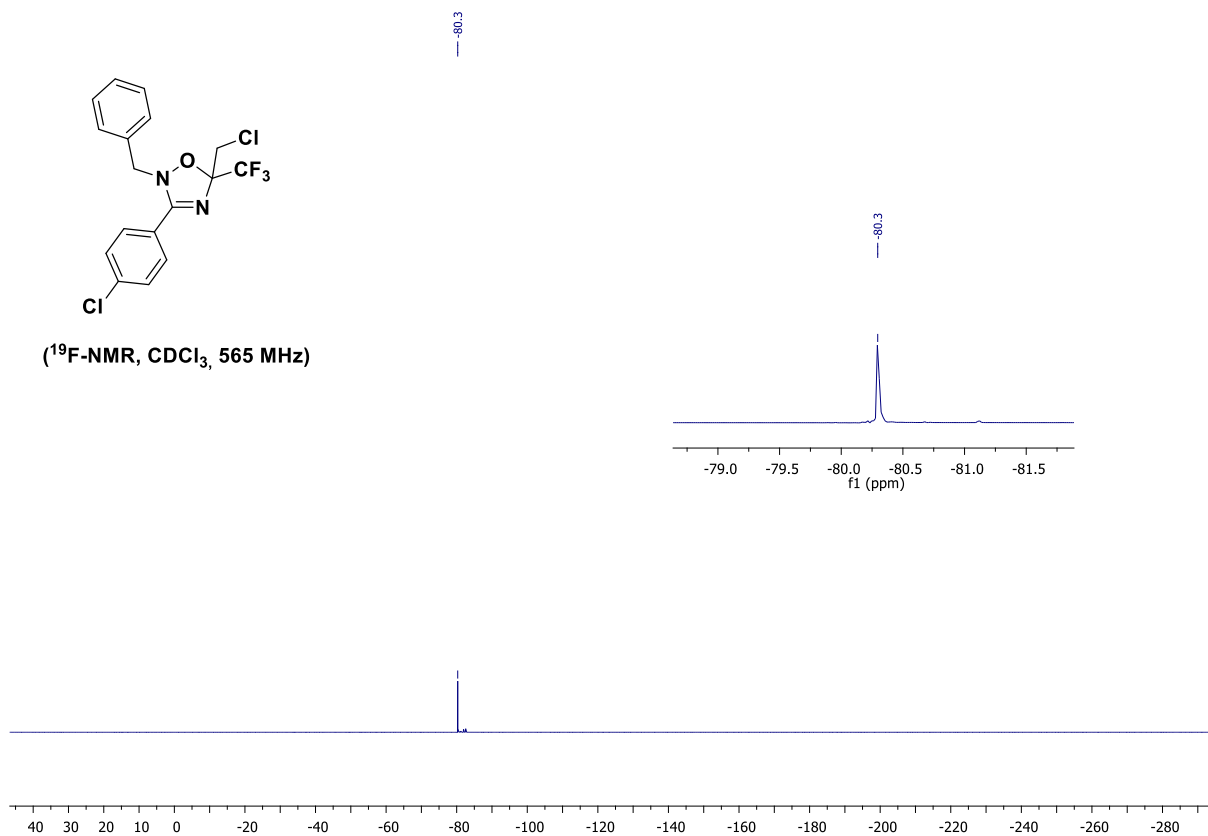



**2-allyl-5-(chloromethyl)-3-phenyl-5-(trifluoromethyl)-2,5-dihydro-1,2,4-oxadiazole (47)**

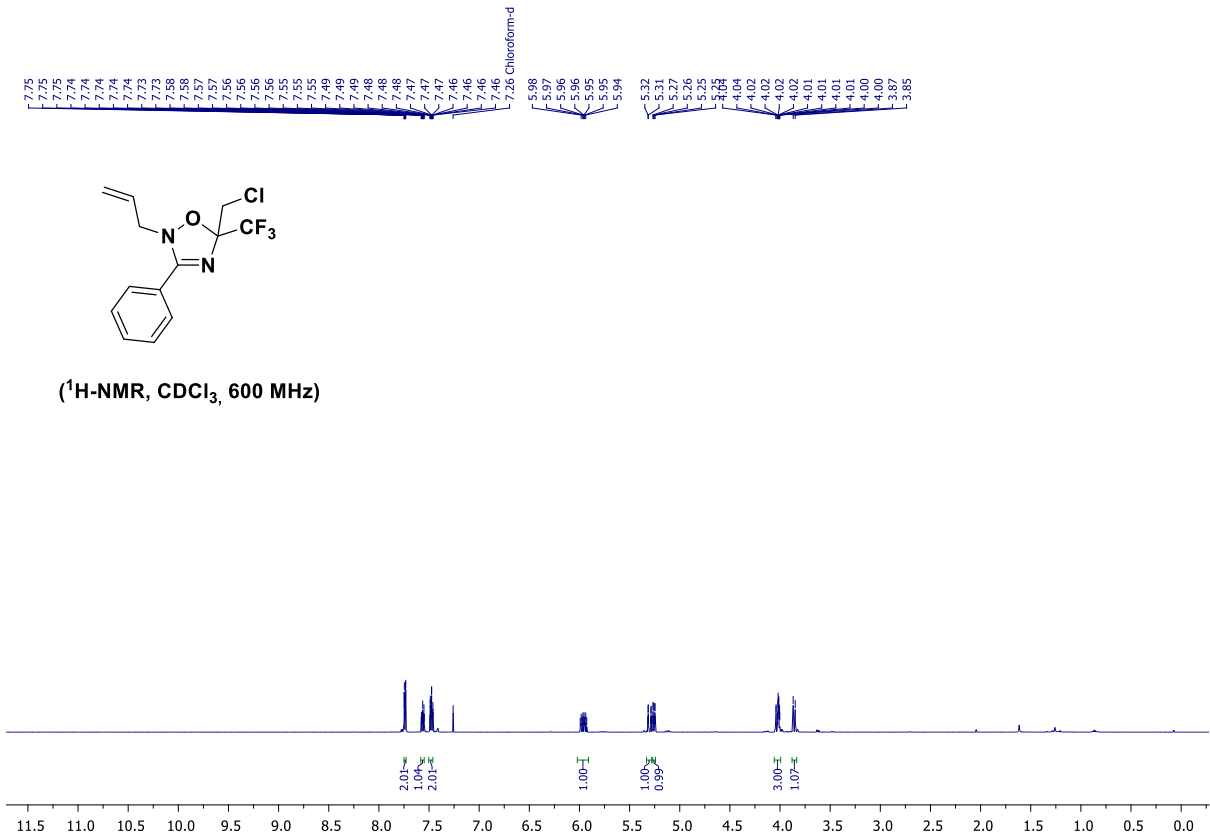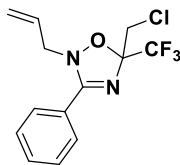

(<sup>1</sup>H-NMR, CDCl<sub>3</sub>, 600 MHz)

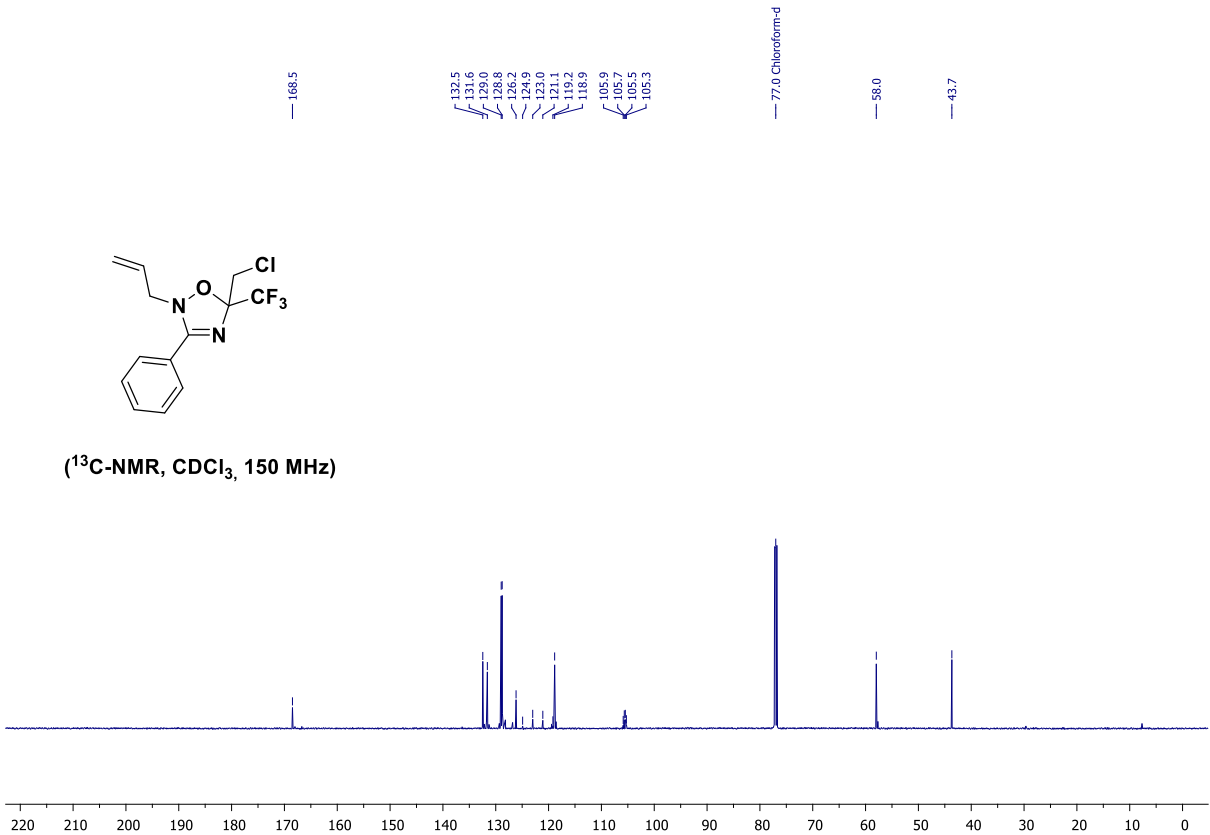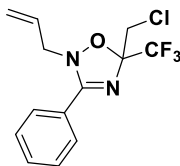

(<sup>13</sup>C-NMR, CDCl<sub>3</sub>, 150 MHz)



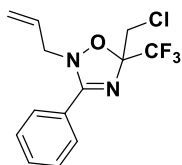

( $^{19}\text{F}$ -NMR,  $\text{CDCl}_3$ , 565 MHz)

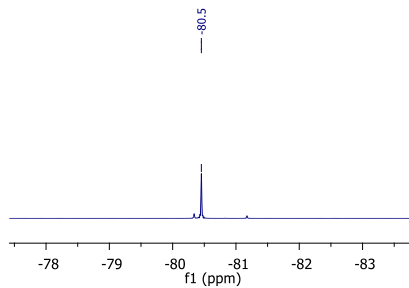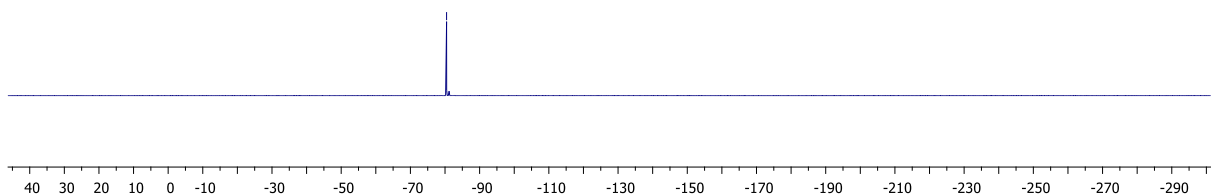

### 3-(4-methoxyphenyl)-2,5-dimethyl-5-(trifluoromethyl)-2,5-dihydro-1,2,4-oxadiazole (48)

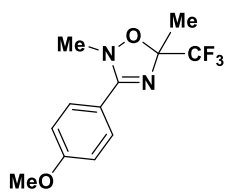

( $^1\text{H}$ -NMR,  $\text{CDCl}_3$ , 600 MHz)

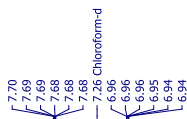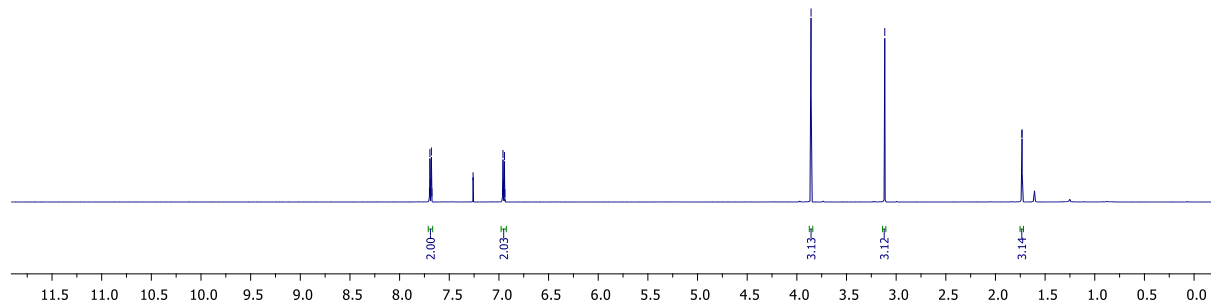



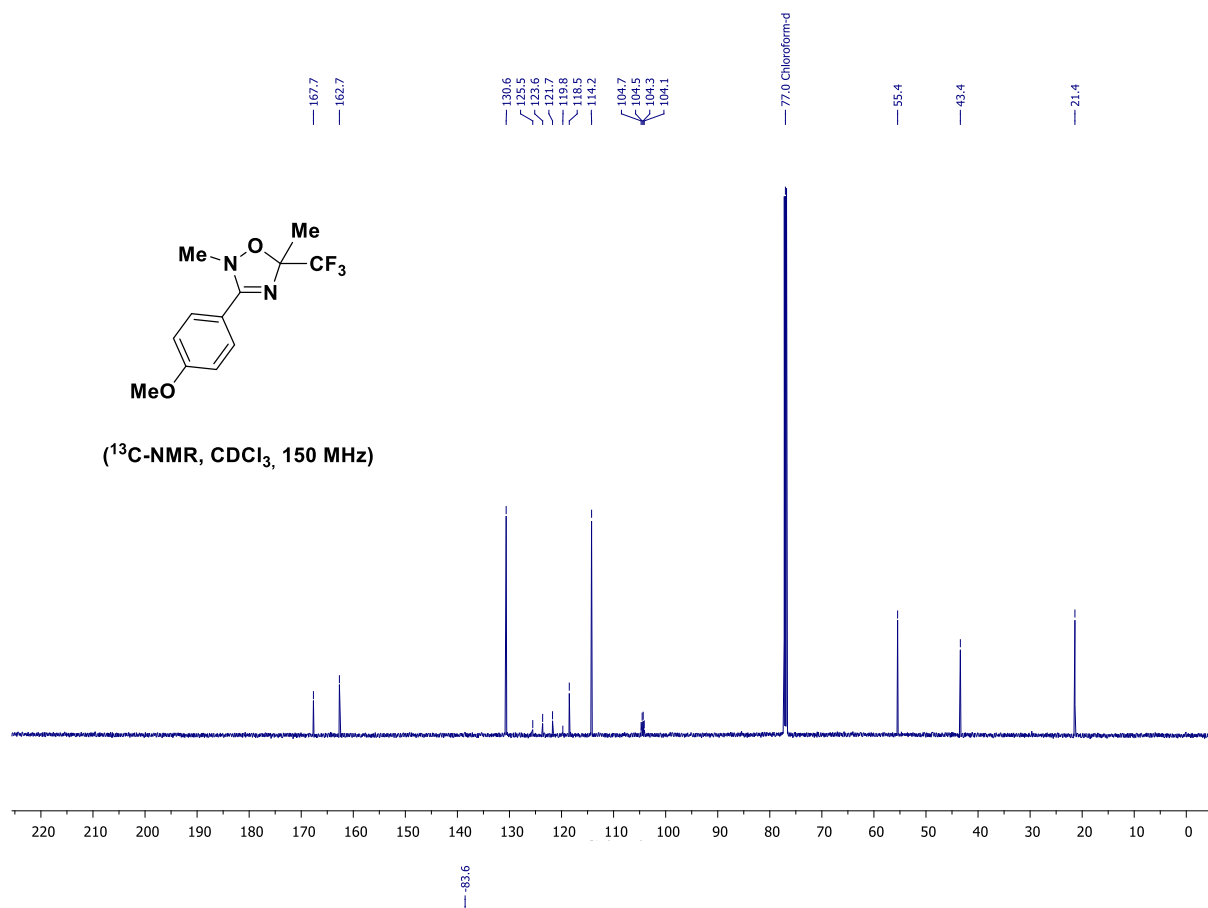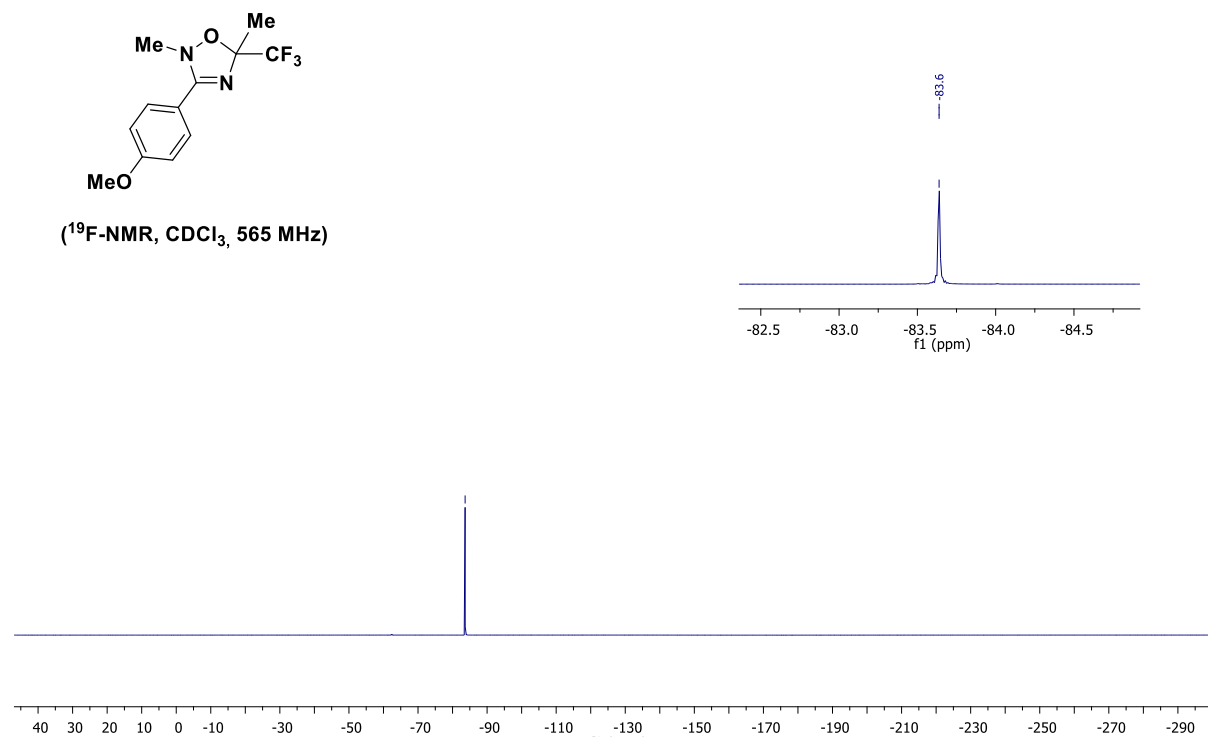



2,5-dimethyl-5-(trifluoromethyl)-3-(4-(trifluoromethyl)phenyl)-2,5-dihydro-1,2,4-oxadiazole (49)

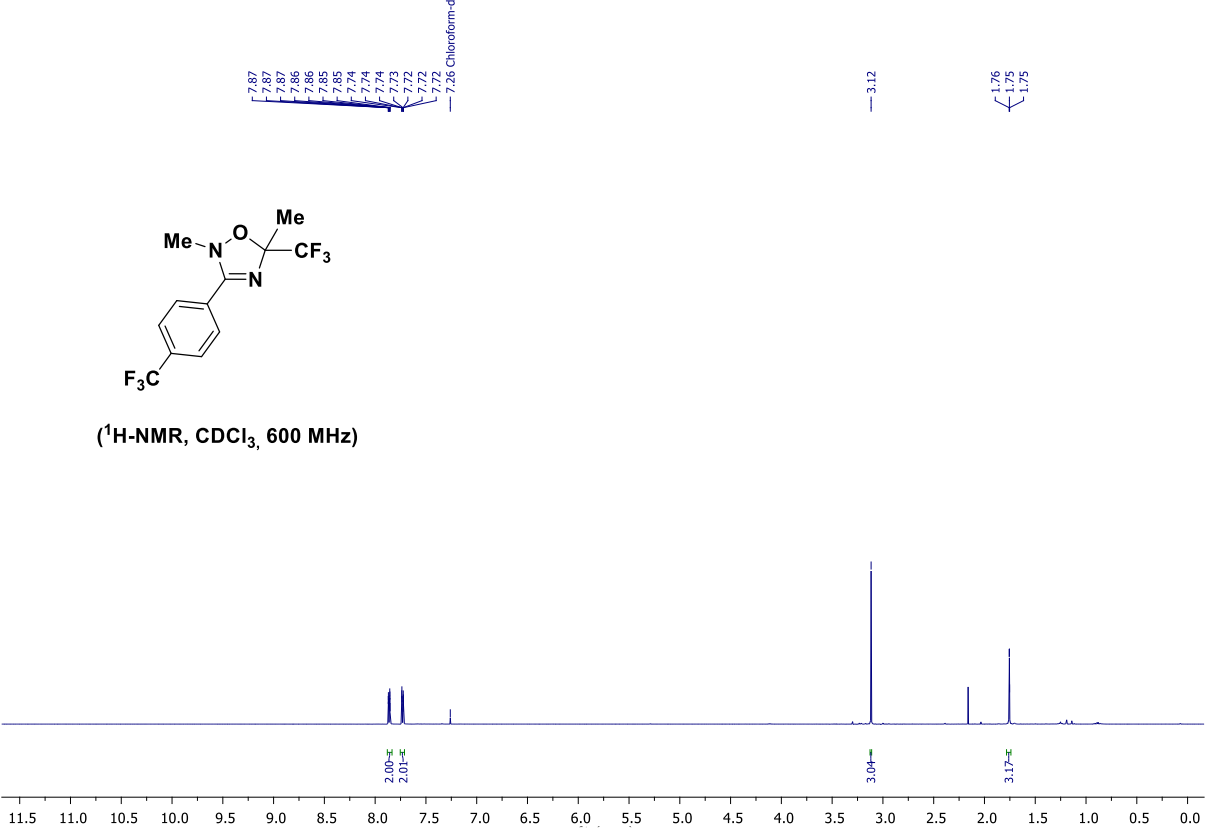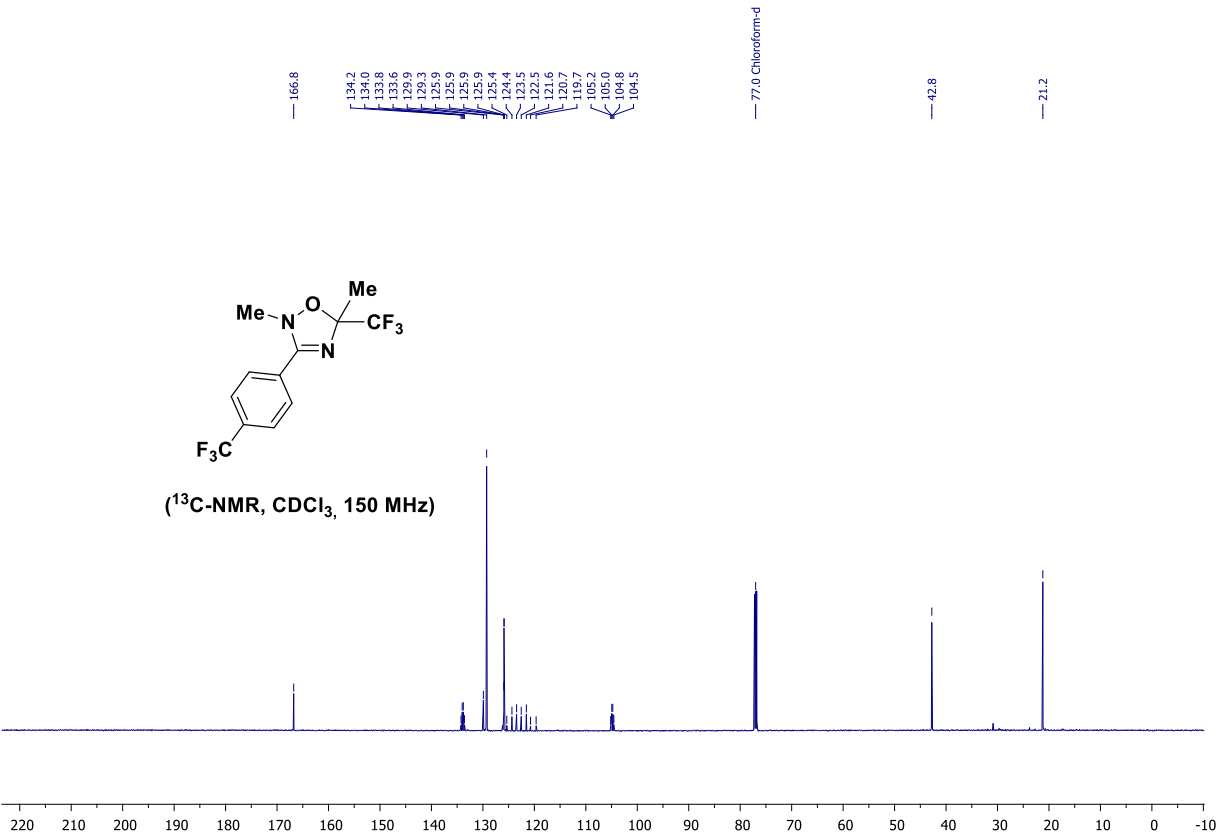



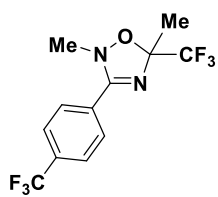

(<sup>19</sup>F-NMR, CDCl<sub>3</sub>, 565 MHz)

— -63.1

— -83.7

— -63.1

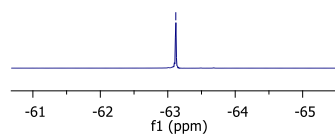

— -83.7

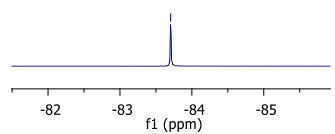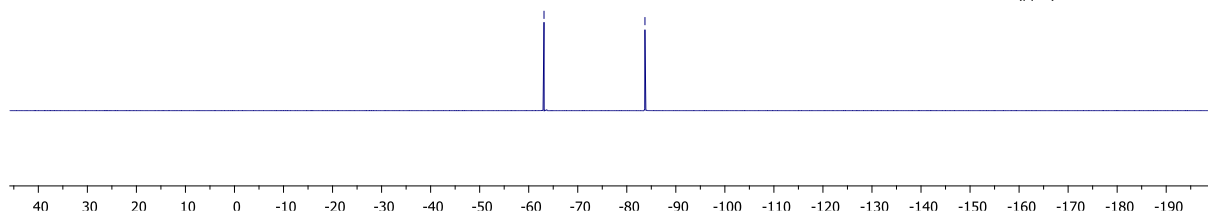



## X-Ray Analysis for compounds 2, 13, 18, 23, 24 and 46

X-ray intensity data measured on STOE STADIVARI diffractometer equipped with multilayer monochromator, Mo K/ $\alpha$  and Cu K/ $\alpha$  micro focus sealed tube and Oxford cooling system. Structures solved by *Direct Methods*. Non-hydrogen atoms were refined with *anisotropic displacement parameters*. Hydrogen atoms inserted at calculated positions and refined with riding model. Used Software: X-Area Recipe<sup>i</sup>, X-Area Pilatus3\_SV<sup>ii</sup>, OLEX2<sup>iii</sup> for cell refinement, data collection, structure solution, refinement, molecular diagrams and graphical user-interface, *Shelxl*<sup>iv</sup> for refinement and graphical user-interface *SHELXT-2015*<sup>v</sup> for structure solution, *SHELXL-2015*<sup>vi</sup> for refinement, *Platon*<sup>vii</sup> for symmetry check. Experimental data and CCDC-Codes Experimental data (Available online: <http://www.ccdc.cam.ac.uk/conts/retrieving.html>) can be found in Table 1. Tables 2 to 7 show data related to sample, crystal data, data collection and structure refinement Figure 1,3,5,7,9, and 11 show molecular structures. Figures 2,4,5,6,8,10 and 12 are related to quality aspects.

**Table 2.** Experimental parameter and CCDC-Code.

| Sample              | Machine        | Source | Temp. | Detector Distance | Time/Frame | #Frames | CCDC    |
|---------------------|----------------|--------|-------|-------------------|------------|---------|---------|
|                     |                |        | [K]   | [mm]              | [s]        |         |         |
| Compound 23 (DC707) | Stoe Stadivari | Mo     | 100   | 50                | 30         | 3381    | 2493076 |
| Compound 2 (DC716)  | Stoe Stadivari | Mo     | 100   | 50                | 10         | 6911    | 2493077 |
| Compound 46 (DC721) | Stoe Stadivari | Cu     | 100   | 40                | 2          | 11276   | 2493078 |
| Compound 13 (DC723) | Stoe Stadivari | Mo     | 100   | 50                | 10         | 4569    | 2493079 |
| Compound 24 (DC747) | Stoe Stadivari | Mo     | 100   | 50                | 2          | 4981    | 2493080 |
| Compound 18 (DC757) | Stoe Stadivari | Mo     | 100   | 50                | 1          | 5761    | 2493081 |



## Compound 2

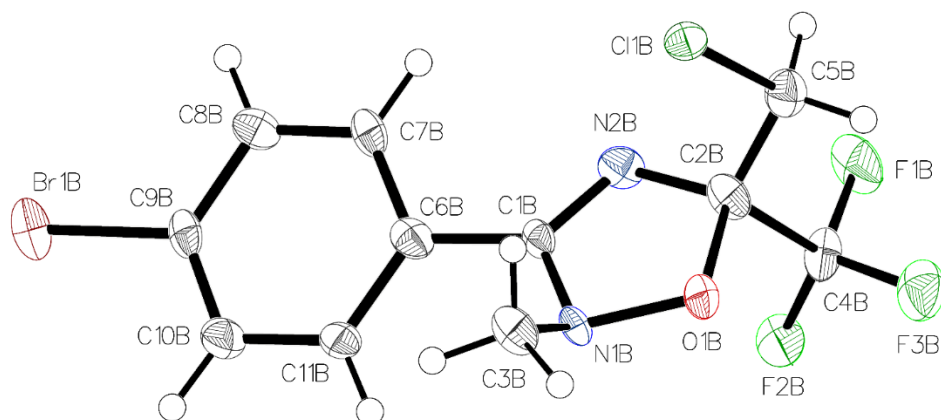

**Figure 1** One of two molecules in the asymmetric drawn with 50% displacement ellipsoid. The bond precision for C-C bonds is 0.0170Å. The spacegroup of *P212121* is chiral but the second molecule in the asymmetric unit is in S and not in R as in the one visualized at the position C2B. The resulting crystal is built of both species and characterizes the racemic compound. 2 B-Alerts had to be discussed in the Cif-file. Both seem to be related to a twinning which could not be explained with the work during the model built. Still the structure proof is reliable.

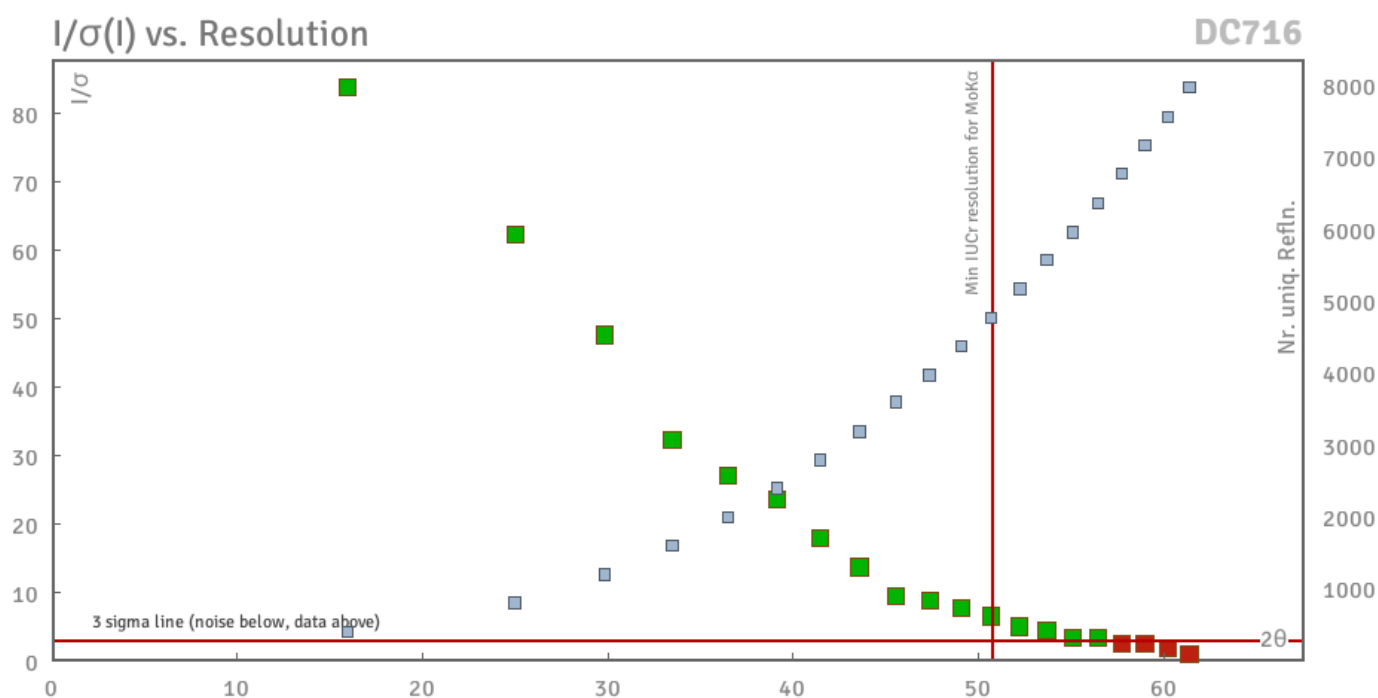

**Figure 2.** Data quality I 3 sigma line: All data are above the “noise level” line along the min IUCR definition.



**Table 1.** Sample and crystal data, Data collection and structure refinement

|                                      |                                                                    |
|--------------------------------------|--------------------------------------------------------------------|
| Identification code                  | DC716                                                              |
| Empirical formula                    | C <sub>11</sub> H <sub>9</sub> BrClF <sub>3</sub> N <sub>2</sub> O |
| Formula weight                       | 357.56                                                             |
| Temperature/K                        | 100                                                                |
| Crystal system                       | orthorhombic                                                       |
| Space group                          | P2 <sub>1</sub> 2 <sub>1</sub> 2 <sub>1</sub>                      |
| a/Å                                  | 27.4602(8)                                                         |
| b/Å                                  | 12.7464(3)                                                         |
| c/Å                                  | 7.4938(2)                                                          |
| α/°                                  | 90                                                                 |
| β/°                                  | 90                                                                 |
| γ/°                                  | 90                                                                 |
| Volume/Å <sup>3</sup>                | 2622.97(12)                                                        |
| Z                                    | 8                                                                  |
| ρ <sub>calc</sub> /g/cm <sup>3</sup> | 1.811                                                              |
| μ/mm <sup>-1</sup>                   | 3.366                                                              |
| F(000)                               | 1408.0                                                             |
| Crystal size/mm <sup>3</sup>         | 0.4 × 0.25 × 0.05                                                  |
| Radiation                            | Mo Kα (λ = 0.71073)                                                |
| 2θ range for data collection/°       | 5.48 to 51.354                                                     |
| Index ranges                         | -33 ≤ h ≤ 32, -15 ≤ k ≤ 15, -8 ≤ l ≤ 9                             |
| Reflections collected                | 38494                                                              |
| Independent reflections              | 4954 [R <sub>int</sub> = 0.0540, R <sub>sigma</sub> = 0.0405]      |
| Data/restraints/parameters           | 4954/0/347                                                         |
| Goodness-of-fit on F <sup>2</sup>    | 1.079                                                              |



|                                                |                                  |
|------------------------------------------------|----------------------------------|
| Final R indexes [ $I \geq 2\sigma(I)$ ]        | $R_1 = 0.0728$ , $wR_2 = 0.1870$ |
| Final R indexes [all data]                     | $R_1 = 0.0837$ , $wR_2 = 0.1937$ |
| Largest diff. peak/hole / $e \text{ \AA}^{-3}$ | 2.40/-0.80                       |
| Flack parameter                                | 0.5                              |

### Compound 13

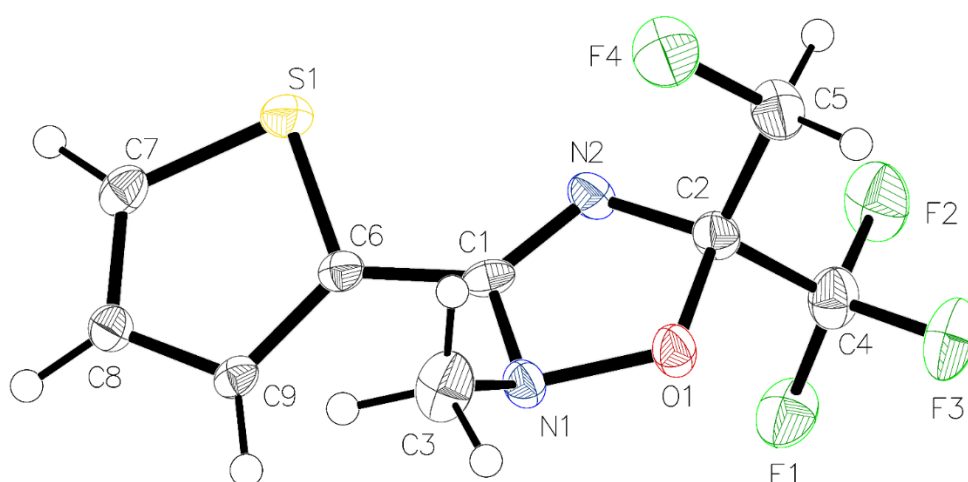

**Figure 3.** Asymmetric drawn with 50% displacement ellipsoid. The bond precision for C-C bonds is 0.0042 Å.

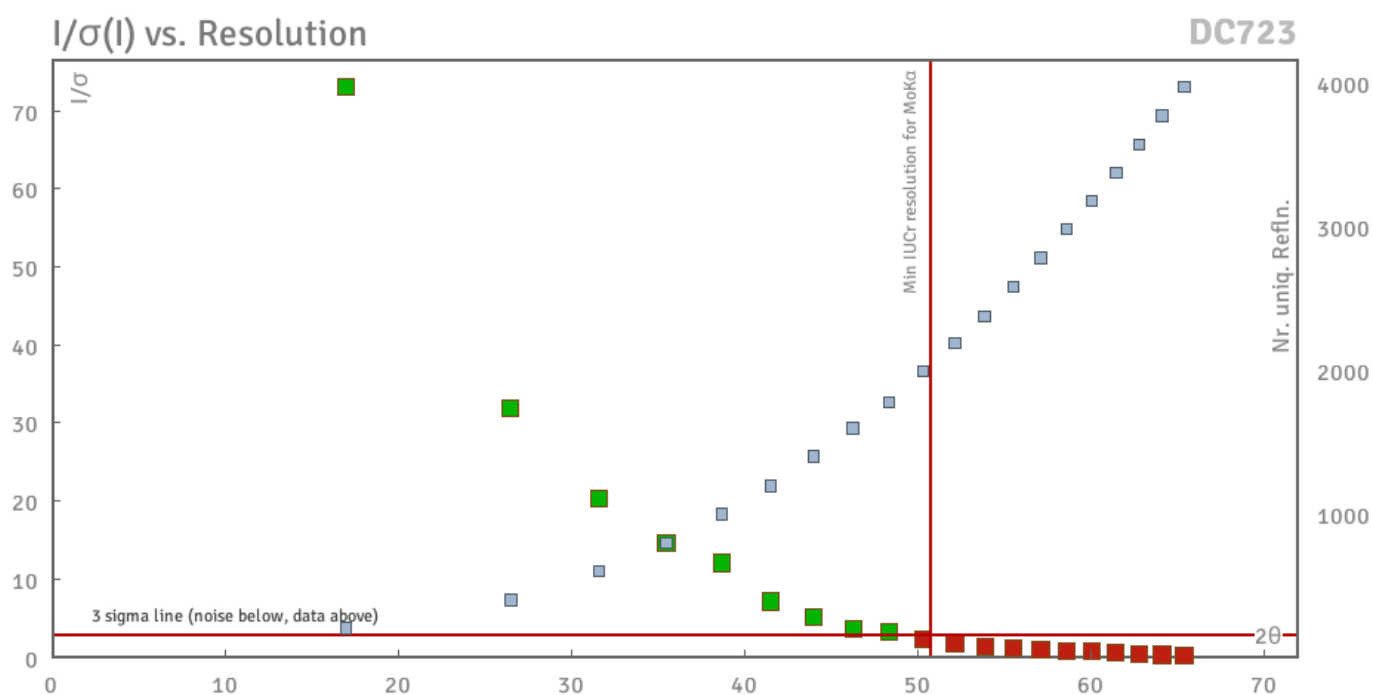

**Figure 4.** Data quality 3 sigma line: Almost all data are above the “noise level” line along the min IUCR definition.



**Table 4.** Sample and crystal data, Data collection and structure refinement

|                                      |                                                                |
|--------------------------------------|----------------------------------------------------------------|
| Identification code                  | DC723                                                          |
| Empirical formula                    | C <sub>9</sub> H <sub>8</sub> F <sub>4</sub> N <sub>2</sub> OS |
| Formula weight                       | 268.23                                                         |
| Temperature/K                        | 100                                                            |
| Crystal system                       | orthorhombic                                                   |
| Space group                          | Pbca                                                           |
| a/Å                                  | 7.6657(5)                                                      |
| b/Å                                  | 11.8373(8)                                                     |
| c/Å                                  | 24.323(2)                                                      |
| α/°                                  | 90                                                             |
| β/°                                  | 90                                                             |
| γ/°                                  | 90                                                             |
| Volume/Å <sup>3</sup>                | 2207.1(3)                                                      |
| Z                                    | 8                                                              |
| ρ <sub>calc</sub> /g/cm <sup>3</sup> | 1.614                                                          |
| μ/mm <sup>-1</sup>                   | 0.333                                                          |
| F(000)                               | 1088.0                                                         |
| Crystal size/mm <sup>3</sup>         | 0.3 × 0.187 × 0.01                                             |
| Radiation                            | Mo Kα (λ = 0.71073)                                            |
| 2θ range for data collection/°       | 6.282 to 50.694                                                |
| Index ranges                         | -9 ≤ h ≤ 9, -14 ≤ k ≤ 14, -28 ≤ l ≤ 29                         |
| Reflections collected                | 31974                                                          |
| Independent reflections              | 2020 [R <sub>int</sub> = 0.1131, R <sub>sigma</sub> = 0.0545]  |
| Data/restraints/parameters           | 2020/0/155                                                     |
| Goodness-of-fit on F <sup>2</sup>    | 0.999                                                          |



|                                                |                                  |
|------------------------------------------------|----------------------------------|
| Final R indexes [ $I \geq 2\sigma(I)$ ]        | $R_1 = 0.0421$ , $wR_2 = 0.1107$ |
| Final R indexes [all data]                     | $R_1 = 0.0728$ , $wR_2 = 0.1207$ |
| Largest diff. peak/hole / $e \text{ \AA}^{-3}$ | 0.55/-0.37                       |

### Compound 18

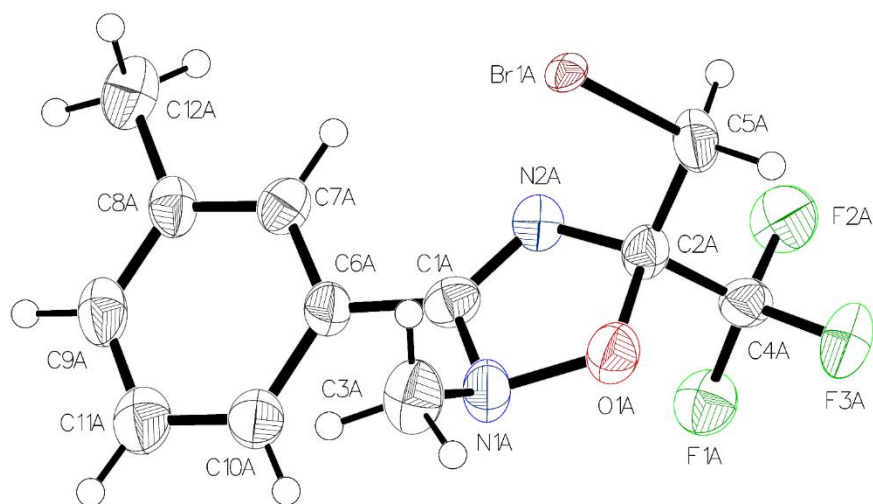

**Figure 5.** One of two molecules in the asymmetric drawn with 50% displacement ellipsoid. The bond precision for C-C bonds is 0.0107Å

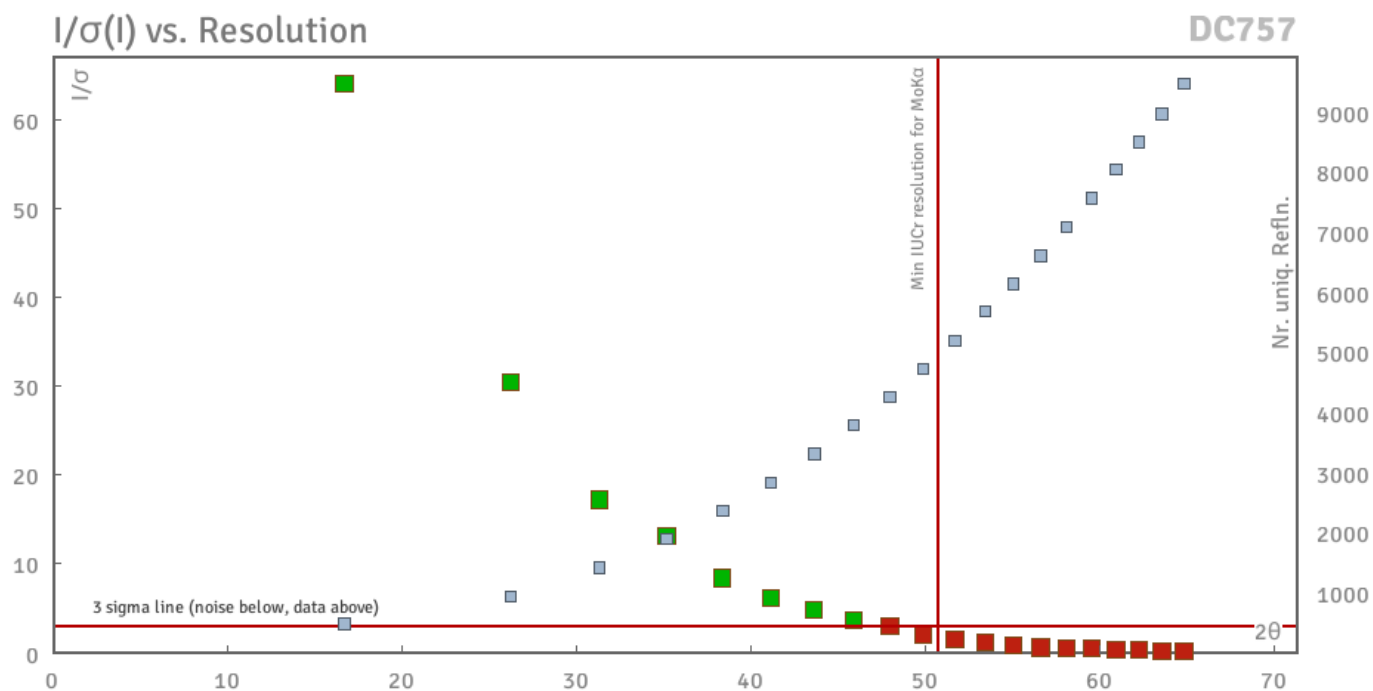

**Figure 6.** Data quality 3 sigma line: Almost all data are above the “noise level” line along the min IUCR definition.



**Table 5.** Sample and crystal data, Data collection and structure refinement

|                                      |                                                                   |
|--------------------------------------|-------------------------------------------------------------------|
| Identification code                  | DC757                                                             |
| Empirical formula                    | C <sub>12</sub> H <sub>12</sub> BrF <sub>3</sub> N <sub>2</sub> O |
| Formula weight                       | 337.15                                                            |
| Temperature/K                        | 100                                                               |
| Crystal system                       | monoclinic                                                        |
| Space group                          | P2 <sub>1</sub> /c                                                |
| a/Å                                  | 9.5398(6)                                                         |
| b/Å                                  | 14.6986(7)                                                        |
| c/Å                                  | 19.7485(14)                                                       |
| α/°                                  | 90                                                                |
| β/°                                  | 103.711(5)                                                        |
| γ/°                                  | 90                                                                |
| Volume/Å <sup>3</sup>                | 2690.3(3)                                                         |
| Z                                    | 8                                                                 |
| ρ <sub>calc</sub> /g/cm <sup>3</sup> | 1.665                                                             |
| μ/mm <sup>-1</sup>                   | 3.084                                                             |
| F(000)                               | 1344.0                                                            |
| Crystal size/mm <sup>3</sup>         | 0.3 × 0.233 × 0.1                                                 |
| Radiation                            | Mo Kα (λ = 0.71073)                                               |
| 2θ range for data collection/°       | 5.544 to 50.694                                                   |
| Index ranges                         | -11 ≤ h ≤ 11, -17 ≤ k ≤ 17, -23 ≤ l ≤ 23                          |
| Reflections collected                | 52144                                                             |
| Independent reflections              | 4922 [R <sub>int</sub> = 0.0793, R <sub>sigma</sub> = 0.0971]     |
| Data/restraints/parameters           | 4922/10/347                                                       |
| Goodness-of-fit on F <sup>2</sup>    | 1.007                                                             |



|                                                |                                  |
|------------------------------------------------|----------------------------------|
| Final R indexes [ $I \geq 2\sigma(I)$ ]        | $R_1 = 0.0490$ , $wR_2 = 0.1402$ |
| Final R indexes [all data]                     | $R_1 = 0.0842$ , $wR_2 = 0.1471$ |
| Largest diff. peak/hole / $e \text{ \AA}^{-3}$ | 0.86/-0.71                       |

### Compound 23

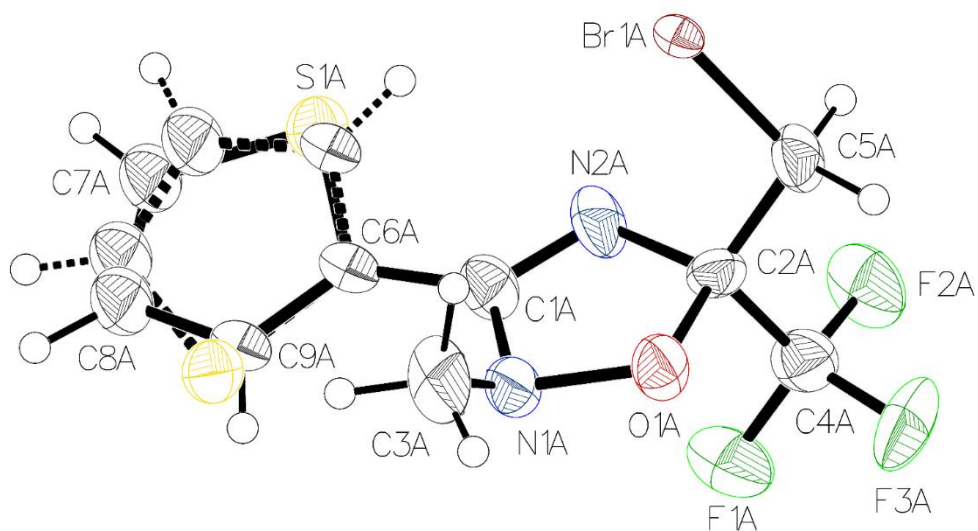

**Figure 7.** One of two molecules in the asymmetric drawn with 50% displacement ellipsoid. The bond precision for C-C bonds is 0.0137Å. The degree of disorder is 24%.



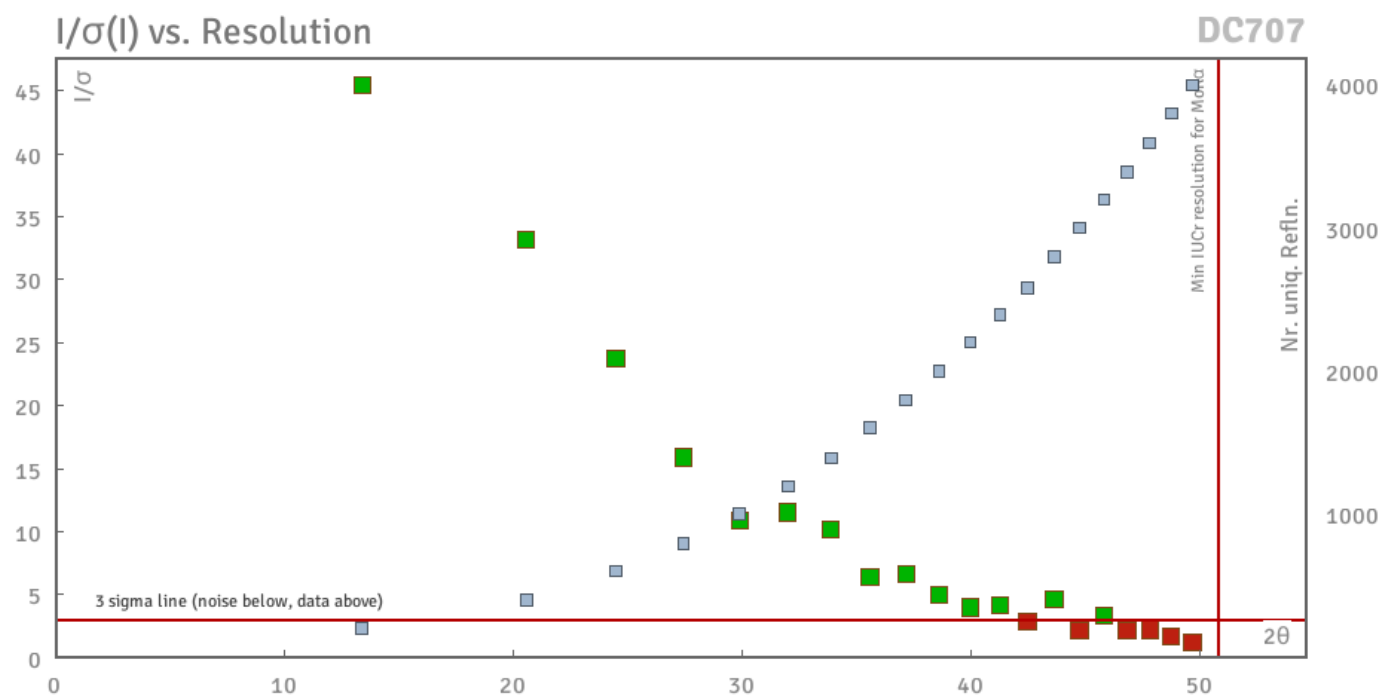

**Figure 8.** Data quality I 3 sigma line: Data higher 40 degree start getting close and below the “noise level” line along the min IUCr definition. The result still allows the proof of the structure.

**Table 6.** Sample and crystal data, Data collection and structure refinement

|                     |                                                                  |
|---------------------|------------------------------------------------------------------|
| Identification code | DC707                                                            |
| Empirical formula   | C <sub>9</sub> H <sub>8</sub> BrF <sub>3</sub> N <sub>2</sub> OS |
| Formula weight      | 329.14                                                           |
| Temperature/K       | 100                                                              |
| Crystal system      | monoclinic                                                       |
| Space group         | P2 <sub>1</sub> /c                                               |
| a/Å                 | 8.7339(10)                                                       |
| b/Å                 | 14.4009(8)                                                       |
| c/Å                 | 19.2869(13)                                                      |
| α/°                 | 90                                                               |
| β/°                 | 102.089(7)                                                       |
| γ/°                 | 90                                                               |



|                                             |                                                                |
|---------------------------------------------|----------------------------------------------------------------|
| Volume/Å <sup>3</sup>                       | 2372.0(3)                                                      |
| Z                                           | 8                                                              |
| $\rho_{\text{calc}}/\text{g}/\text{cm}^3$   | 1.843                                                          |
| $\mu/\text{mm}^{-1}$                        | 3.665                                                          |
| F(000)                                      | 1296.0                                                         |
| Crystal size/mm <sup>3</sup>                | 0.14 × 0.08 × 0.02                                             |
| Radiation                                   | Mo K $\alpha$ ( $\lambda$ = 0.71073)                           |
| 2 $\theta$ range for data collection/°      | 5.726 to 50.098                                                |
| Index ranges                                | -8 ≤ h ≤ 10, -16 ≤ k ≤ 17, -22 ≤ l ≤ 16                        |
| Reflections collected                       | 19213                                                          |
| Independent reflections                     | 4114 [ $R_{\text{int}}$ = 0.1399, $R_{\text{sigma}}$ = 0.3041] |
| Data/restraints/parameters                  | 4114/156/310                                                   |
| Goodness-of-fit on $F^2$                    | 0.963                                                          |
| Final R indexes [ $ I  \geq 2\sigma(I)$ ]   | $R_1$ = 0.0600, $wR_2$ = 0.1563                                |
| Final R indexes [all data]                  | $R_1$ = 0.1709, $wR_2$ = 0.1730                                |
| Largest diff. peak/hole / e Å <sup>-3</sup> | 1.21/-1.12                                                     |

## Compound 24

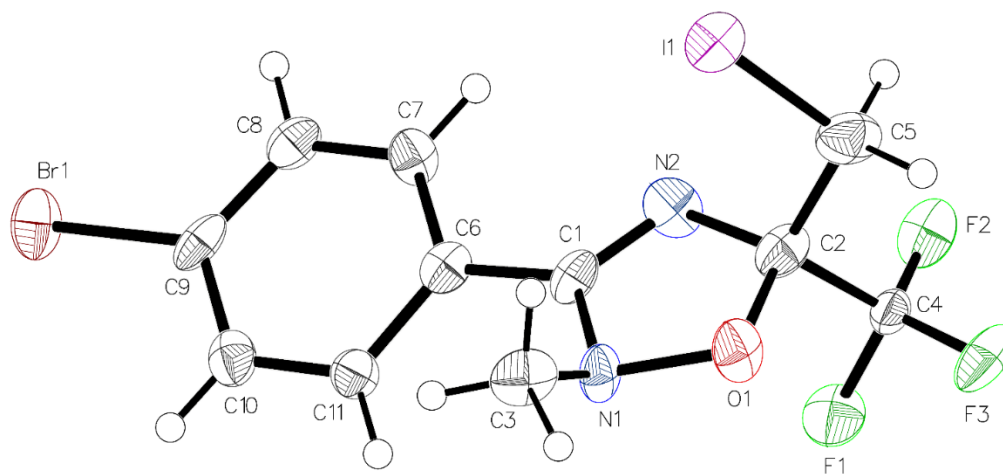

**Figure 9.** Asymmetric drawn with 50% displacement ellipsoid. The bond precision for C-C bonds is 0.0169 Å.



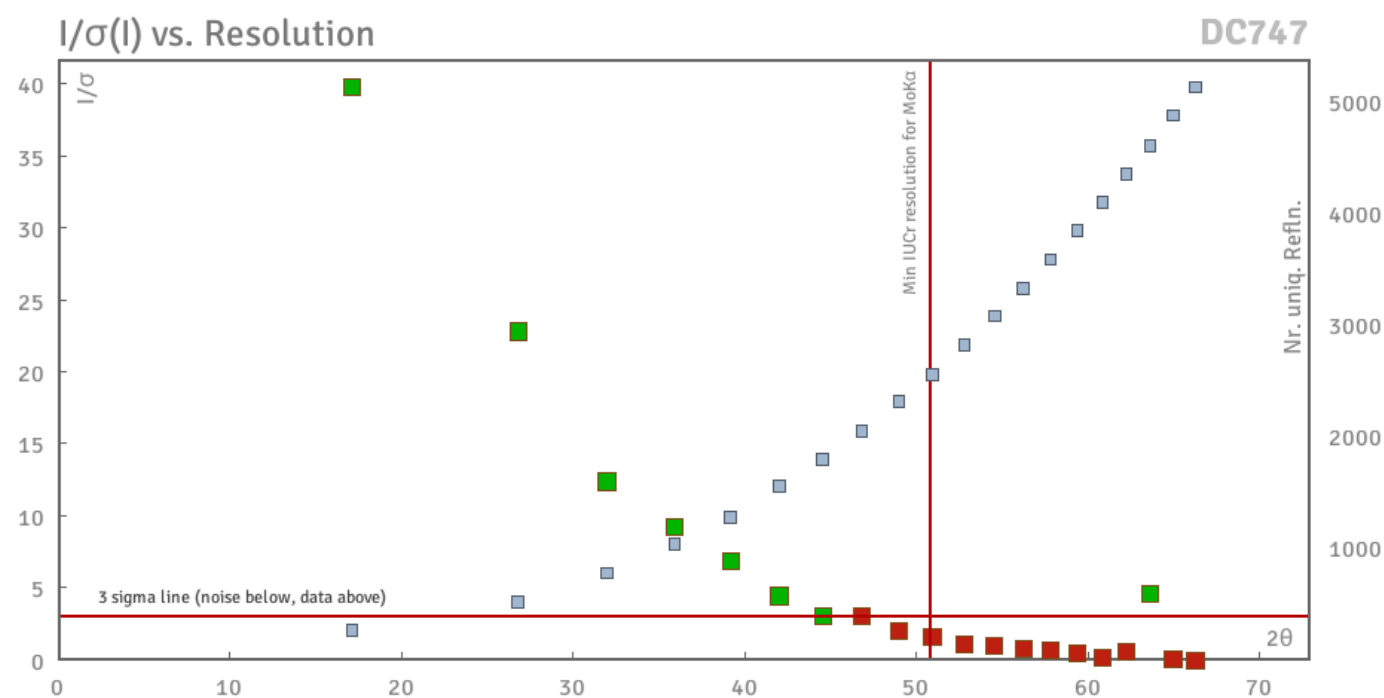

**Figure 10.** Data quality 3 sigma line: Almost all data are above the “noise level” line along the min IUCR definition.

**Table 7.** Sample and crystal data, Data collection and structure refinement

|                     |                                                                   |
|---------------------|-------------------------------------------------------------------|
| Identification code | DC747                                                             |
| Empirical formula   | C <sub>11</sub> H <sub>9</sub> BrF <sub>3</sub> IN <sub>2</sub> O |
| Formula weight      | 449.01                                                            |
| Temperature/K       | 100                                                               |
| Crystal system      | monoclinic                                                        |
| Space group         | P2 <sub>1</sub> /c                                                |
| a/Å                 | 13.9854(13)                                                       |
| b/Å                 | 12.3430(14)                                                       |
| c/Å                 | 8.1470(7)                                                         |
| α/°                 | 90                                                                |
| β/°                 | 102.027(7)                                                        |



|                                                |                                                                  |
|------------------------------------------------|------------------------------------------------------------------|
| $\gamma/^\circ$                                | 90                                                               |
| Volume/ $\text{\AA}^3$                         | 1375.5(2)                                                        |
| Z                                              | 4                                                                |
| $\rho_{\text{calc}}/\text{g}/\text{cm}^3$      | 2.168                                                            |
| $\mu/\text{mm}^{-1}$                           | 5.260                                                            |
| F(000)                                         | 848.0                                                            |
| Crystal size/ $\text{mm}^3$                    | $0.4 \times 0.217 \times 0.1$                                    |
| Radiation                                      | Mo K $\alpha$ ( $\lambda = 0.71073$ )                            |
| 2 $\theta$ range for data collection/ $^\circ$ | 6.29 to 50.696                                                   |
| Index ranges                                   | $-16 \leq h \leq 16$ , $-14 \leq k \leq 14$ , $-9 \leq l \leq 9$ |
| Reflections collected                          | 17829                                                            |
| Independent reflections                        | 2504 [ $R_{\text{int}} = 0.1449$ , $R_{\text{sigma}} = 0.1026$ ] |
| Data/restraints/parameters                     | 2504/46/173                                                      |
| Goodness-of-fit on $F^2$                       | 1.006                                                            |
| Final R indexes [ $ I  \geq 2\sigma(I)$ ]      | $R_1 = 0.0685$ , $wR_2 = 0.1725$                                 |
| Final R indexes [all data]                     | $R_1 = 0.1168$ , $wR_2 = 0.2059$                                 |
| Largest diff. peak/hole / $\text{e \AA}^{-3}$  | 2.06/-2.12                                                       |



### Compound 46

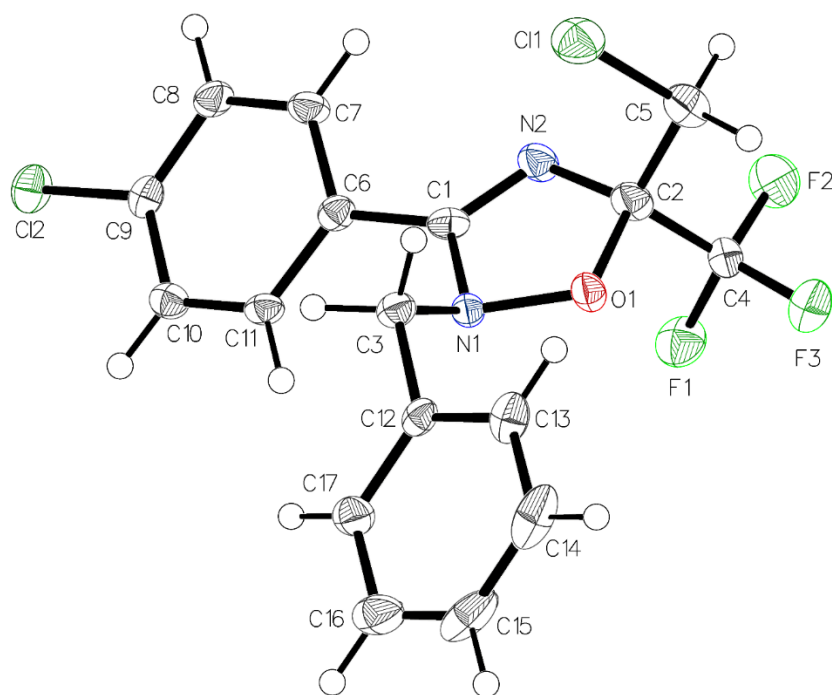

**Figure 11.** Asymmetric drawn with 50% displacement ellipsoid. The bond precision for C-C bonds is 0.0052Å.

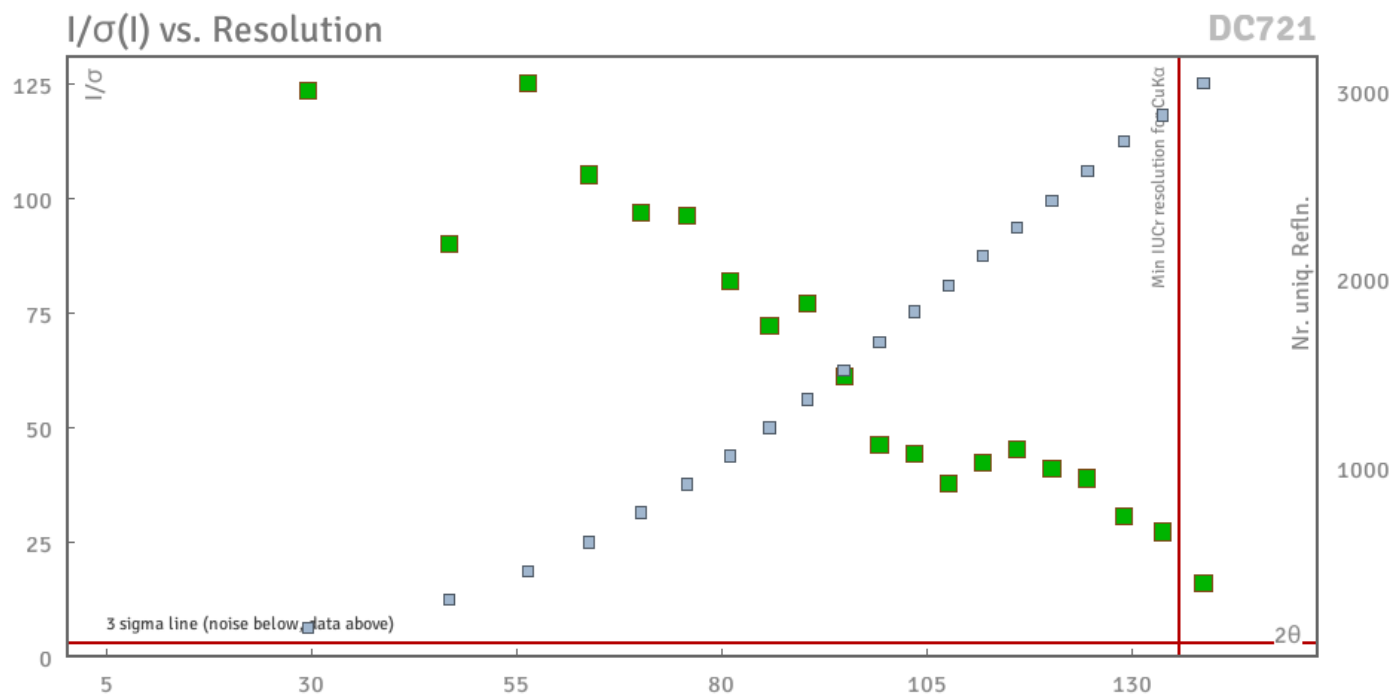

**Figure 12.** Data quality 3 sigma line: All data are above the “noise level” line along the min IUCr definition.



**Table 8.** Sample and crystal data, Data collection and structure refinement

|                                      |                                                                                 |
|--------------------------------------|---------------------------------------------------------------------------------|
| Identification code                  | DC721                                                                           |
| Empirical formula                    | C <sub>17</sub> H <sub>13</sub> Cl <sub>2</sub> F <sub>3</sub> N <sub>2</sub> O |
| Formula weight                       | 389.19                                                                          |
| Temperature/K                        | 100                                                                             |
| Crystal system                       | monoclinic                                                                      |
| Space group                          | P2 <sub>1</sub> /n                                                              |
| a/Å                                  | 10.8042(4)                                                                      |
| b/Å                                  | 13.9249(4)                                                                      |
| c/Å                                  | 11.1764(4)                                                                      |
| α/°                                  | 90                                                                              |
| β/°                                  | 99.627(3)                                                                       |
| γ/°                                  | 90                                                                              |
| Volume/Å <sup>3</sup>                | 1657.78(10)                                                                     |
| Z                                    | 4                                                                               |
| ρ <sub>calc</sub> /g/cm <sup>3</sup> | 1.559                                                                           |
| μ/mm <sup>-1</sup>                   | 3.899                                                                           |
| F(000)                               | 792.0                                                                           |
| Crystal size/mm <sup>3</sup>         | 0.34 × 0.19 × 0.06                                                              |
| Radiation                            | Cu Kα (λ = 1.54186)                                                             |
| 2θ range for data collection/°       | 10.238 to 141.27                                                                |
| Index ranges                         | -12 ≤ h ≤ 11, -15 ≤ k ≤ 16, -13 ≤ l ≤ 7                                         |
| Reflections collected                | 23115                                                                           |
| Independent reflections              | 2913 [R <sub>int</sub> = 0.0218, R <sub>sigma</sub> = 0.0116]                   |
| Data/restraints/parameters           | 2913/0/226                                                                      |
| Goodness-of-fit on F <sup>2</sup>    | 1.072                                                                           |



|                                                |                                  |
|------------------------------------------------|----------------------------------|
| Final R indexes [ $I \geq 2\sigma(I)$ ]        | $R_1 = 0.0566$ , $wR_2 = 0.1573$ |
| Final R indexes [all data]                     | $R_1 = 0.0589$ , $wR_2 = 0.1593$ |
| Largest diff. peak/hole / $e \text{ \AA}^{-3}$ | 0.94/-0.63                       |



## Computational Details

### Methods

Geometry calculations and thermochemistry were performed using the Gaussian 16 program.<sup>2</sup> The stationary points on the energy hypersurface were studied using the DFT M06-2X functional.<sup>3</sup> The basis set chosen for performing geometry optimizations and subsequent vibrational analysis was def2-TZVP.<sup>4-5</sup> Vibrational analysis was conducted to examine the nature of the critical points. The molecules were considered solutes in a polarized continuum (THF) within the Solvation Model based on density (SMD).<sup>6</sup> The relative free energies reported in this section were calculated at 195 K and expressed in kcal mol<sup>-1</sup>. Single-point calculations using the coupled cluster method, CCSD(T), were performed to refine the energy. Single-point CCSD(T) calculations were performed using geometries optimized at the M06-2X/def2-TZVP level with the same basis set using the DLPNO approximation<sup>7</sup> available in ORCA software<sup>8</sup>, version 6.0. To compute the free energies at the CCSD(T)/def2-TZVP level, the potential energies at the CCSD(T)/def2-TZVP level were combined with the thermochemistry calculated at the M06-2x/def-TZVP level. Calculations related to conformational sampling were conducted using CREST,<sup>9</sup> then the most stable conformers were optimized at DFT level. Quantitative evaluation of the steric hindrance and calculation of the Fukui function were performed using the package Multiwfn.<sup>10</sup> Images were generated using the graphical software Jmol.<sup>11</sup>

Earlier calculations related to the bromide compound were conducted with explicit solvent only (PCM) (Fig. 13a). However, subsequent studies have considered also explicit solvent simulation (explicit solvation + PCM) (Fig. 13b), due to the peculiar behaviour observed in the case of brominated compounds. Since the same reaction performed with bromine gave the two products in comparable yield, explicit solvent molecules were introduced in the calculation to better and more realistically account for all possible interactions and steric effects.

This involves the introduction of coordinated molecules to the Li atom. Experimentally, the reaction between 1,2,4-oxodiazole and methyl iodide was conducted in tetrahydrofuran; thus, three molecules of THF were added to the calculations.

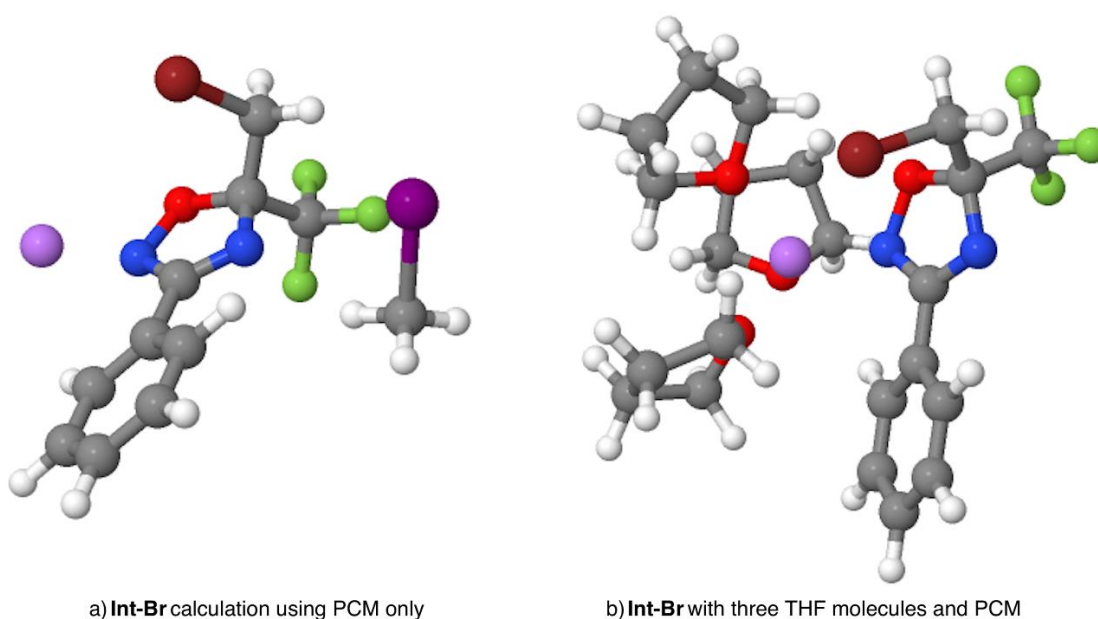

**Figure 13.** Solvent simulation with and without explicit solvent molecules.



The nucleophilicity of the two nitrogen atoms was evaluated in each reactant with the three different halogen atoms for each structure. This evaluation was conducted using the Fukui function,<sup>12</sup> a significant principal in conceptual density functional theory (CDFT). This function calculates the frontier orbitals and describes the electronic density distribution after the addition or removal of electrons. This enables the prediction of the most electrophilic and nucleophilic sites within a molecule.

Fukui functions are also defined as derivatives of the electron density with respect to the number of electrons at a constant potential. Therefore, by adding or removing an electron while maintaining a constant potential, we can calculate the density changes at each point. These electrons are then added/removed from the frontier orbitals.

The Fukui function for electrophilic attack  $f^-$  is:

$$f^-(r) = \rho_N(r) - \rho_{N-1}(r) \approx \rho^{HOMO}(r)$$

The Fukui function for nucleophilic attack  $f^+$  is:

$$f^+(r) = \rho_{N+1}(r) - \rho_N(r) \approx \rho^{LUMO}(r)$$

where  $N$  denotes the number of electrons in the system.

Finally, to determine the condensed local nucleophilicity index:

$$N_{Nu}^A = N_{Nu} f_A^-$$

Condensed nucleophilicity indices were calculated for the most stable conformations with explicit solvation, considering the different orientations of the halogen atom forming dihedral angles with the oxygen atom of approximately 60, 180 and -60 degrees, with fluoride, bromine and iodine (Table 9), respectively 1 for 60 degrees, 2 for 180 degrees, and 3 for -60 degrees. (Example for clarity: Int-F1 refers to the Int-F compound with the fluorine atom at 60 degrees relative to the oxygen in the ring).

**Table 9.** Condensed nucleophilicity indices,  $N_{Nu}^A$ , for nitrogen at the 2 and 4-position. Expressed as  $e^*eV$ , where  $e$  is the elementary charge. The figure on the right shows the **Int-F** molecule, in which the nitrogen atom near the oxygen in the isoxazole ring is referred to as N2, while the nitrogen at position 4 is referred to as N4.

| Compound | N2      | N4      |
|----------|---------|---------|
| Int-F1   | 0.69005 | 0.52398 |
| Int-F2   | 0.62602 | 0.51844 |
| Int-F3   | 0.62575 | 0.5673  |
| Int-I1   | 0.6361  | 0.53307 |
| Int-I2   | 0.60085 | 0.50644 |
| Int-I3   | 0.57774 | 0.46737 |
| Int-Br   | 0.57182 | 0.49387 |

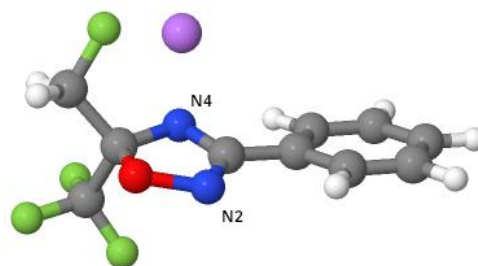

According to the calculations of nucleophilicity, the reactivity could be explained by a steric effect.

A conformational search was performed to determine the best conformation:

- coordination sites for lithium atoms,
- for the three solvent molecules surrounding the cation,
- orientation of the halogen atom attached to the oxadiazole ring.



It was found to be the most stable compound for the cases with fluoride, bromine, and iodide, as summarized in Figure 14.

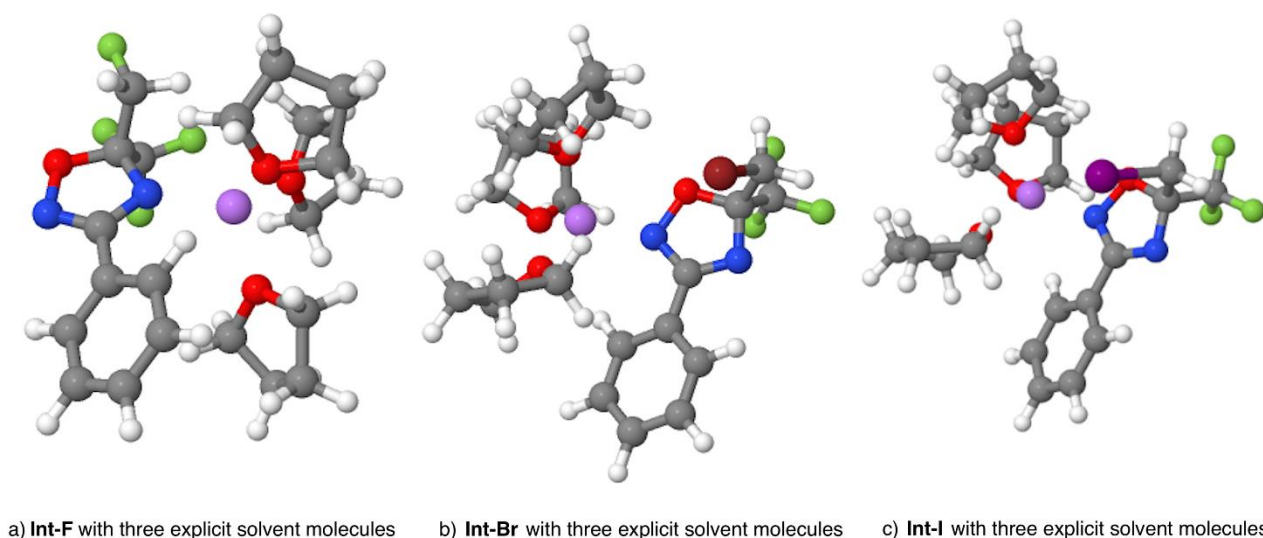

**Figure 14.** Results of the conformational search for the compound with halogen's dihedral angle respect to oxygen atom of oxadiazole ring with fluoride (left, in green), bromine (center, in dark red), and iodine (right, in purple).

In the case of the compound with fluorine, the most stable conformation was with the halogen atom on the opposite side of the lithium coordination at the nitrogen in the 4-position, forming a dihedral angle of approximately  $60^\circ$  with oxygen (Figure 14a). Conversely, for the compound with iodine and bromine, the halogen prefers to be above the ring, while coordination between lithium and nitrogen occurs at the 2-position (Figure 14b and 14c).

Energy decomposition analysis (EDA) is an important class of methods for exploring the nature of the interactions between fragments in a chemical system. In the current study, Liu's energy decomposition<sup>13</sup> (EDA-SBL) was used. In this method, the total molecular energy is expressed as:

$$E = E_{steric} + E_{electrostatic} + E_{quantum}$$

The steric term corresponds to the energy derived from the Weizsäcker kinetic functional,<sup>14</sup> representing the exact kinetic energy under the assumption that electrons in the current system behave as noninteracting bosons. The electrostatic term is the sum of all the classical Coulomb interactions of the particles in the system, and the quantum term is the energy caused by the quantum effect.

Cartesian Coordinates and energies:

#### **Int-F**

| Atom | X         | Y         | Z (Angstrom) |
|------|-----------|-----------|--------------|
| 8    | 1.289789  | -0.006651 | -1.579827    |
| 6    | 1.594440  | 0.285624  | -0.225156    |
| 7    | 0.344432  | 0.488525  | 0.442197     |
| 6    | -0.553036 | 0.030306  | -0.466412    |
| 7    | -0.109361 | -0.304804 | -1.636180    |
| 6    | 2.339727  | -0.940453 | 0.348967     |
| 9    | 3.533997  | -1.105098 | -0.243538    |
| 6    | 2.542420  | 1.487113  | -0.129117    |
| 9    | 1.764627  | 2.653914  | 0.000924     |
| 6    | -1.996491 | -0.043830 | -0.156637    |



|   |           |           |           |
|---|-----------|-----------|-----------|
| 6 | -2.427130 | 0.059074  | 1.163656  |
| 6 | -3.781967 | 0.003897  | 1.464860  |
| 6 | -4.713685 | -0.160152 | 0.449468  |
| 6 | -4.286978 | -0.269277 | -0.870183 |
| 6 | -2.936583 | -0.208951 | -1.174155 |
| 9 | 1.649398  | -2.064624 | 0.174281  |
| 9 | 2.568314  | -0.810239 | 1.662519  |
| 1 | -1.694596 | 0.163605  | 1.954149  |
| 1 | -2.600020 | -0.285372 | -2.199938 |
| 1 | -4.108224 | 0.082092  | 2.494341  |
| 1 | -5.011152 | -0.398209 | -1.664685 |
| 1 | -5.769932 | -0.205229 | 0.683471  |
| 1 | 3.180808  | 1.445230  | 0.752186  |
| 1 | 3.136513  | 1.593527  | -1.033477 |
| 3 | 0.190489  | 2.281948  | 1.077009  |

Energy                -976.972697    (Hartree)

**TS Int-F→2F**

| Atom | X         | Y         | Z (Angstrom) |
|------|-----------|-----------|--------------|
| 8    | 2.794132  | -0.983191 | 1.084905     |
| 6    | 1.650056  | -1.436919 | 0.355648     |
| 7    | 0.904165  | -0.259968 | 0.024319     |
| 6    | 1.673911  | 0.755137  | 0.380945     |
| 7    | 2.821596  | 0.476122  | 0.970915     |
| 6    | 2.188683  | -2.088428 | -0.937950    |
| 9    | 2.774180  | -3.264686 | -0.715831    |
| 6    | 0.897164  | -2.469078 | 1.181633     |
| 9    | 0.397287  | -1.836172 | 2.300481     |
| 6    | 1.322105  | 2.164196  | 0.117782     |
| 6    | 0.551317  | 2.487193  | -0.997143    |
| 6    | 0.233986  | 3.811811  | -1.258331    |
| 6    | 0.684093  | 4.815407  | -0.409323    |
| 6    | 1.455459  | 4.494520  | 0.701155     |
| 6    | 1.777129  | 3.171810  | 0.965966     |
| 9    | 3.142936  | -1.279221 | -1.469823    |
| 9    | 1.254971  | -2.255990 | -1.860051    |
| 1    | 0.214059  | 1.700742  | -1.660926    |
| 1    | 2.368497  | 2.913498  | 1.834957     |
| 1    | -0.363113 | 4.060619  | -2.126138    |
| 1    | 1.803106  | 5.275705  | 1.364875     |
| 1    | 0.432774  | 5.848686  | -0.612855    |
| 1    | 0.066155  | -2.887403 | 0.610390     |
| 1    | 1.567064  | -3.263236 | 1.509347     |
| 6    | -1.203876 | -0.302374 | 0.000162     |
| 1    | -1.156212 | -0.844331 | -0.926612    |
| 1    | -1.189583 | -0.822400 | 0.940656     |
| 1    | -1.214540 | 0.772744  | -0.007576    |
| 53   | -3.764505 | -0.380827 | -0.031879    |
| 3    | 4.350881  | -0.304455 | 0.073772     |

Energy                -1314.479476    (Hartree)

**4F**

| Atom | X        | Y         | Z (Angstrom) |
|------|----------|-----------|--------------|
| 8    | 2.817500 | -1.475748 | 0.896410     |
| 6    | 1.537853 | -1.710725 | 0.349079     |
| 7    | 1.055819 | -0.392635 | -0.000517    |
| 6    | 2.077236 | 0.471013  | 0.313549     |
| 7    | 3.126585 | -0.093150 | 0.783895     |
| 6    | 1.722701 | -2.549452 | -0.932592    |
| 9    | 2.214712 | -3.761117 | -0.659580    |
| 6    | 0.673639 | -2.464829 | 1.351451     |
| 9    | 0.555289 | -1.675704 | 2.476991     |
| 6    | 2.029550 | 1.922296  | 0.068578     |



|        |              |           |           |
|--------|--------------|-----------|-----------|
| 6      | 1.471538     | 2.417911  | -1.108349 |
| 6      | 1.474904     | 3.782932  | -1.351574 |
| 6      | 2.031082     | 4.654843  | -0.423489 |
| 6      | 2.589118     | 4.160348  | 0.748668  |
| 6      | 2.590465     | 2.795789  | 0.996993  |
| 9      | 2.565452     | -1.951854 | -1.771904 |
| 9      | 0.561275     | -2.716456 | -1.572465 |
| 1      | 1.049916     | 1.734995  | -1.835762 |
| 1      | 3.017300     | 2.401251  | 1.909995  |
| 1      | 1.044441     | 4.165584  | -2.267906 |
| 1      | 3.020587     | 4.838491  | 1.473635  |
| 1      | 2.028275     | 5.720611  | -0.614003 |
| 1      | -0.322492    | -2.663332 | 0.953890  |
| 1      | 1.160990     | -3.397959 | 1.632996  |
| 6      | -0.367826    | -0.071106 | 0.031634  |
| 1      | -0.902664    | -0.721150 | -0.657905 |
| 1      | -0.784650    | -0.183432 | 1.033848  |
| 1      | -0.510439    | 0.955502  | -0.291629 |
| 53     | -4.163589    | 0.242414  | -0.009682 |
| Energy | -1307.096728 |           | (Hartree) |

# **TS Int-F→2F**

| Atom   | X            | Y         | Z (Angstrom) |
|--------|--------------|-----------|--------------|
| 8      | -1.164481    | -1.317420 | -0.720228    |
| 6      | -2.126338    | -1.139926 | 0.334860     |
| 7      | -2.025401    | 0.219709  | 0.755997     |
| 6      | -1.170132    | 0.775922  | -0.042730    |
| 6      | -3.501772    | -1.384052 | -0.316882    |
| 9      | -3.689028    | -2.663434 | -0.638256    |
| 6      | -1.871681    | -2.148062 | 1.444866     |
| 9      | -0.645466    | -1.853454 | 2.003015     |
| 6      | -0.792621    | 2.199891  | 0.032887     |
| 6      | -1.180923    | 2.953056  | 1.139044     |
| 6      | -0.830064    | 4.291057  | 1.222569     |
| 6      | -0.094237    | 4.883753  | 0.202857     |
| 6      | 0.291078     | 4.135965  | -0.902550    |
| 6      | -0.055406    | 2.795666  | -0.989270    |
| 9      | -3.565037    | -0.683238 | -1.479187    |
| 9      | -4.512815    | -0.991746 | 0.438561     |
| 1      | -1.751040    | 2.480707  | 1.928244     |
| 1      | 0.239785     | 2.213926  | -1.853581    |
| 1      | -1.128498    | 4.872611  | 2.085317     |
| 1      | 0.861757     | 4.596493  | -1.698582    |
| 1      | 0.179132     | 5.929222  | 0.270346     |
| 1      | -2.639047    | -2.061435 | 2.215410     |
| 1      | -1.834802    | -3.163999 | 1.052468     |
| 7      | -0.582317    | -0.010450 | -0.985920    |
| 6      | 1.435427     | -0.371912 | -0.542555    |
| 1      | 1.459610     | -1.030238 | -1.392359    |
| 1      | 1.678349     | 0.669013  | -0.666495    |
| 1      | 1.116274     | -0.746800 | 0.415554     |
| 53     | 3.874392     | -0.922664 | 0.002523     |
| 3      | -1.621101    | -0.668345 | -2.511514    |
| Energy | -1314.480082 |           | (Hartree)    |

# **Int-I**

| Atom | X         | Y         | Z (Angstrom) |
|------|-----------|-----------|--------------|
| 6    | -0.935236 | 0.906598  | 0.028695     |
| 6    | 1.121198  | 0.303308  | -0.307452    |
| 7    | 0.266835  | 0.487584  | 0.669819     |
| 7    | 0.708263  | 0.474861  | -1.563682    |
| 6    | 2.527719  | -0.091390 | -0.065256    |
| 6    | 3.033512  | -0.072244 | 1.232083     |



|        |              |           |           |
|--------|--------------|-----------|-----------|
| 6      | 3.349507     | -0.481114 | -1.121320 |
| 6      | 4.350394     | -0.436976 | 1.470704  |
| 1      | 2.387887     | 0.230607  | 2.045962  |
| 6      | 4.666177     | -0.844251 | -0.879631 |
| 1      | 2.951900     | -0.507002 | -2.127758 |
| 6      | 5.168715     | -0.822545 | 0.415956  |
| 1      | 4.738748     | -0.420297 | 2.481140  |
| 1      | 5.300005     | -1.148660 | -1.702819 |
| 1      | 6.196294     | -1.107985 | 0.603370  |
| 8      | -0.710923    | 0.812300  | -1.386177 |
| 6      | -1.157335    | 2.415498  | 0.298532  |
| 9      | -0.167744    | 3.122098  | -0.316201 |
| 9      | -1.123761    | 2.732455  | 1.583243  |
| 9      | -2.303075    | 2.872621  | -0.211130 |
| 6      | -2.191665    | 0.152152  | 0.434184  |
| 1      | -2.367029    | 0.256929  | 1.501875  |
| 1      | -3.060015    | 0.483252  | -0.127535 |
| 53     | -1.989952    | -1.933070 | 0.053112  |
| 3      | 0.311555     | 2.237194  | -2.228307 |
| Energy | -1174.756440 | (Hartree) |           |

#### TS Int-F→4I

| Atom   | X            | Y         | Z (Angstrom) |
|--------|--------------|-----------|--------------|
| 6      | -1.860165    | -0.289934 | 0.839063     |
| 6      | -0.992791    | 1.624748  | 0.203309     |
| 7      | -0.649892    | 0.472851  | 0.756586     |
| 7      | -2.263434    | 1.805416  | -0.104136    |
| 6      | -0.023608    | 2.705228  | -0.072835    |
| 6      | 1.097657     | 2.859036  | 0.739140     |
| 6      | -0.236123    | 3.581545  | -1.135684    |
| 6      | 2.002491     | 3.879498  | 0.485130     |
| 1      | 1.250470     | 2.189620  | 1.575731     |
| 6      | 0.672543     | 4.597891  | -1.387685    |
| 1      | -1.107055    | 3.459255  | -1.766776    |
| 6      | 1.792668     | 4.747494  | -0.578836    |
| 1      | 2.870718     | 3.997371  | 1.120543     |
| 1      | 0.508046     | 5.272772  | -2.217816    |
| 1      | 2.501528     | 5.541407  | -0.777208    |
| 8      | -2.884391    | 0.540496  | 0.282548     |
| 6      | -2.226021    | -0.505863 | 2.324400     |
| 9      | -2.337450    | 0.655858  | 2.964288     |
| 9      | -1.285798    | -1.225152 | 2.943278     |
| 9      | -3.388769    | -1.151702 | 2.463297     |
| 6      | -1.856707    | -1.645347 | 0.140262     |
| 1      | -1.090542    | -2.309368 | 0.529424     |
| 1      | -2.830872    | -2.121004 | 0.207021     |
| 53     | -1.471499    | -1.389346 | -1.945334    |
| 6      | 1.262362     | -0.400136 | 0.535885     |
| 1      | 1.463428     | 0.304956  | -0.250405    |
| 1      | 0.805996     | -1.343523 | 0.298020     |
| 1      | 1.474837     | -0.152908 | 1.559211     |
| 53     | 3.590290     | -1.428150 | 0.244597     |
| 3      | -3.119927    | 0.926950  | -1.618943    |
| Energy | -1512.268672 | (Hartree) |              |

#### 4I

| Atom | X         | Y        | Z (Angstrom) |
|------|-----------|----------|--------------|
| 6    | -2.341904 | 0.410888 | -0.028478    |
| 6    | -0.424454 | 1.446334 | -0.579331    |
| 7    | -1.058850 | 0.846863 | 0.469696     |
| 7    | -1.083210 | 1.430454 | -1.678846    |
| 6    | 0.888030  | 2.114286 | -0.510637    |
| 6    | 1.279687  | 2.823875 | 0.627111     |



|                               |           |           |           |
|-------------------------------|-----------|-----------|-----------|
| 6                             | 1.731949  | 2.065917  | -1.624353 |
| 6                             | 2.507443  | 3.479864  | 0.648342  |
| 1                             | 0.630399  | 2.872780  | 1.490841  |
| 6                             | 2.954770  | 2.726904  | -1.599426 |
| 1                             | 1.433606  | 1.496077  | -2.493890 |
| 6                             | 3.345377  | 3.434874  | -0.463477 |
| 1                             | 2.808560  | 4.021619  | 1.534619  |
| 1                             | 3.608901  | 2.675400  | -2.459170 |
| 1                             | 4.302991  | 3.937263  | -0.440711 |
| 8                             | -2.278066 | 0.719446  | -1.404409 |
| 6                             | -3.458209 | 1.291318  | 0.590115  |
| 9                             | -3.239015 | 2.580320  | 0.335151  |
| 9                             | -3.501393 | 1.144472  | 1.918909  |
| 9                             | -4.660104 | 0.980873  | 0.104315  |
| 6                             | -2.697795 | -1.053553 | 0.181642  |
| 1                             | -2.864126 | -1.288901 | 1.229106  |
| 1                             | -3.587401 | -1.293458 | -0.393563 |
| 53                            | -1.148170 | -2.333000 | -0.520076 |
| 6                             | -0.517105 | 0.470797  | 1.764278  |
| 1                             | 0.559760  | 0.331216  | 1.687617  |
| 1                             | -0.946210 | -0.483320 | 2.067740  |
| 1                             | -0.742090 | 1.217648  | 2.526913  |
| 53                            | 3.071975  | -1.370706 | 0.502457  |
| 3                             | 3.016934  | 1.164440  | 0.207861  |
| Energy -1512.346490 (Hartree) |           |           |           |

#### TS Int-F→2I

| Atom                          | X         | Y         | Z (Angstrom) |
|-------------------------------|-----------|-----------|--------------|
| 8                             | 0.685224  | -1.091731 | -0.550357    |
| 6                             | 1.421625  | -1.002289 | 0.679985     |
| 7                             | 1.253440  | 0.330350  | 1.162600     |
| 6                             | 0.481154  | 0.922421  | 0.308151     |
| 7                             | 0.043545  | 0.196390  | -0.757377    |
| 6                             | 0.748645  | -1.993863 | 1.654188     |
| 9                             | 0.803090  | -3.247477 | 1.192969     |
| 6                             | 2.871521  | -1.419820 | 0.473407     |
| 6                             | 0.040569  | 2.323639  | 0.442348     |
| 6                             | 0.351968  | 3.031888  | 1.601478     |
| 6                             | -0.061405 | 4.347070  | 1.741141     |
| 6                             | -0.787202 | 4.960880  | 0.726606     |
| 6                             | -1.098530 | 4.257341  | -0.429955    |
| 6                             | -0.686082 | 2.940874  | -0.574504    |
| 9                             | -0.536701 | -1.688926 | 1.826057     |
| 9                             | 1.338552  | -1.975414 | 2.850053     |
| 1                             | 0.913801  | 2.542572  | 2.386296     |
| 1                             | -0.922433 | 2.395793  | -1.479433    |
| 1                             | 0.180607  | 4.894382  | 2.643105     |
| 1                             | -1.662358 | 4.734238  | -1.221224    |
| 1                             | -1.110518 | 5.988185  | 0.838004     |
| 1                             | 3.449492  | -1.260139 | 1.378751     |
| 1                             | 2.958001  | -2.447656 | 0.133318     |
| 6                             | -2.017501 | -0.217718 | -0.636025    |
| 1                             | -1.740410 | -1.253468 | -0.726658    |
| 1                             | -2.083515 | 0.239107  | 0.336195     |
| 1                             | -2.189633 | 0.374262  | -1.516912    |
| 53                            | -4.497995 | -0.861197 | -0.530989    |
| 53                            | 3.779803  | -0.214597 | -1.039152    |
| 3                             | 1.225799  | -0.279908 | -2.243432    |
| Energy -1512.270339 (Hartree) |           |           |              |

#### 2I

| Atom | X        | Y         | Z (Angstrom) |
|------|----------|-----------|--------------|
| 8    | 0.787827 | -1.206217 | -0.388918    |



|        |              |           |           |
|--------|--------------|-----------|-----------|
| 6      | 1.730814     | -1.062364 | 0.668874  |
| 7      | 1.659554     | 0.300309  | 1.119389  |
| 6      | 0.742111     | 0.860270  | 0.427308  |
| 7      | 0.159526     | 0.061149  | -0.547088 |
| 6      | 1.273686     | -1.989769 | 1.817677  |
| 9      | 1.244289     | -3.267634 | 1.429867  |
| 6      | 3.117413     | -1.491323 | 0.214600  |
| 6      | 0.342005     | 2.269352  | 0.566406  |
| 6      | 0.485350     | 2.893428  | 1.804117  |
| 6      | 0.137370     | 4.226849  | 1.947966  |
| 6      | -0.345561    | 4.941691  | 0.857827  |
| 6      | -0.480673    | 4.322403  | -0.378231 |
| 6      | -0.140249    | 2.986246  | -0.527257 |
| 9      | 0.045177     | -1.670270 | 2.226515  |
| 9      | 2.086627     | -1.902545 | 2.871815  |
| 1      | 0.862759     | 2.325910  | 2.645002  |
| 1      | -0.230252    | 2.504445  | -1.492759 |
| 1      | 0.242478     | 4.709705  | 2.910897  |
| 1      | -0.848163    | 4.880949  | -1.229261 |
| 1      | -0.614960    | 5.984155  | 0.971717  |
| 1      | 3.832852     | -1.388673 | 1.025189  |
| 1      | 3.107839     | -2.511023 | -0.159427 |
| 6      | -1.291242    | -0.120258 | -0.562916 |
| 1      | -1.550901    | -0.719911 | -1.431899 |
| 1      | -1.636933    | -0.612334 | 0.348884  |
| 1      | -1.758392    | 0.856823  | -0.656535 |
| 53     | -5.078058    | -0.644661 | -0.649268 |
| 53     | 3.826550     | -0.272095 | -1.381831 |
| 3      | -5.974536    | -1.925848 | 1.349892  |
| Energy | -1512.329889 | (Hartree) |           |

#### Methyl Iodide

| Atom   | X           | Y         | Z (Angstrom) |
|--------|-------------|-----------|--------------|
| 6      | 1.807446    | 0.000000  | 0.000004     |
| 1      | 2.130162    | 0.173891  | 1.020203     |
| 1      | 2.129833    | 0.796650  | -0.660780    |
| 1      | 2.129788    | -0.970580 | -0.359585    |
| 53     | -0.325178   | 0.000001  | 0.000003     |
| Energy | -337.532450 | (Hartree) |              |

#### Int-Br

| Atom | X         | Y         | Z (Angstrom) |
|------|-----------|-----------|--------------|
| 6    | 0.136288  | -1.670735 | -0.513929    |
| 6    | 1.783810  | -0.286142 | -0.305669    |
| 7    | 0.476615  | -0.290184 | -0.400870    |
| 7    | 2.413256  | -1.452082 | -0.340051    |
| 6    | 2.549929  | 0.970194  | -0.143504    |
| 6    | 1.892347  | 2.115022  | 0.302648     |
| 6    | 3.911930  | 1.029814  | -0.431912    |
| 6    | 2.592050  | 3.301503  | 0.467920     |
| 1    | 0.832704  | 2.061975  | 0.522760     |
| 6    | 4.610047  | 2.217499  | -0.264974    |
| 1    | 4.422664  | 0.153885  | -0.813436    |
| 6    | 3.952021  | 3.354709  | 0.186914     |
| 1    | 2.075296  | 4.186293  | 0.817798     |
| 1    | 5.667134  | 2.257347  | -0.495603    |
| 1    | 4.496964  | 4.281518  | 0.315219     |
| 8    | 1.353855  | -2.411466 | -0.505067    |
| 6    | -0.522230 | -1.923894 | -1.888284    |
| 9    | 0.276653  | -1.542804 | -2.885762    |
| 9    | -1.671700 | -1.248487 | -2.015880    |
| 9    | -0.801935 | -3.220905 | -2.083079    |
| 6    | -0.826835 | -2.176220 | 0.561290     |



|        |                        |           |           |
|--------|------------------------|-----------|-----------|
| 1      | -1.742013              | -1.589601 | 0.557179  |
| 1      | -1.048991              | -3.232599 | 0.436171  |
| 3      | 3.920760               | -2.310855 | 0.363932  |
| 35     | -0.042489              | -1.979319 | 2.326129  |
| 6      | -1.581979              | 2.191515  | -1.486529 |
| 1      | -2.240001              | 2.026995  | -2.332765 |
| 1      | -1.278671              | 3.230357  | -1.415131 |
| 1      | -0.734092              | 1.513738  | -1.487867 |
| 53     | -2.698066              | 1.739181  | 0.275000  |
| Energy | -3788.857295 (Hartree) |           |           |

# TS IntBr→2Br

| Atom   | X                      | Y         | Z (Angstrom) |
|--------|------------------------|-----------|--------------|
| 6      | 1.801573               | -1.024569 | 0.456278     |
| 6      | 0.827702               | 0.896578  | 0.174079     |
| 7      | 1.655566               | 0.297178  | 0.968871     |
| 7      | 0.317591               | 0.178124  | -0.864967    |
| 6      | 0.396792               | 2.295428  | 0.350897     |
| 6      | 0.753686               | 2.979600  | 1.511440     |
| 6      | -0.364384              | 2.933912  | -0.626700    |
| 6      | 0.350319               | 4.292822  | 1.691631     |
| 1      | 1.341903               | 2.473185  | 2.265508     |
| 6      | -0.765098              | 4.248947  | -0.442108    |
| 1      | -0.634870              | 2.407273  | -1.533034    |
| 6      | -0.409107              | 4.928553  | 0.715909     |
| 1      | 0.626339               | 4.821573  | 2.594896     |
| 1      | -1.354529              | 4.743507  | -1.203275    |
| 1      | -0.723742              | 5.954660  | 0.858720     |
| 8      | 0.960169               | -1.117556 | -0.701945    |
| 6      | 1.256632               | -2.049091 | 1.473667     |
| 9      | -0.009430              | -1.776901 | 1.779492     |
| 9      | 1.967169               | -2.034953 | 2.601325     |
| 9      | 1.293470               | -3.291570 | 0.982986     |
| 6      | 3.237472               | -1.392477 | 0.095127     |
| 1      | 3.904417               | -1.217707 | 0.934455     |
| 1      | 3.323421               | -2.414152 | -0.264698    |
| 3      | 1.363808               | -0.338859 | -2.430679    |
| 35     | 3.850630               | -0.239024 | -1.355763    |
| 6      | -1.728095              | -0.220672 | -0.614899    |
| 1      | -1.480332              | -1.253496 | -0.787677    |
| 1      | -1.958668              | 0.425180  | -1.443120    |
| 1      | -1.716419              | 0.175148  | 0.386041     |
| 53     | -4.209250              | -0.840053 | -0.361547    |
| Energy | -3788.833286 (Hartree) |           |              |

# 2Br

| Atom | X         | Y         | Z (Angstrom) |
|------|-----------|-----------|--------------|
| 6    | 2.134659  | -0.678056 | 0.033032     |
| 6    | 0.890278  | 1.116721  | 0.084003     |
| 7    | 1.871499  | 0.605396  | -0.540788    |
| 7    | 0.352407  | 0.303541  | 1.115577     |
| 6    | 0.273295  | 2.413706  | -0.207929    |
| 6    | 1.045481  | 3.409238  | -0.805300    |
| 6    | -1.075330 | 2.634784  | 0.069334     |
| 6    | 0.468595  | 4.629616  | -1.112775    |
| 1    | 2.090521  | 3.220944  | -1.015165    |
| 6    | -1.646769 | 3.856528  | -0.251339    |
| 1    | -1.679974 | 1.849558  | 0.508714     |
| 6    | -0.876083 | 4.852986  | -0.836505    |
| 1    | 1.066455  | 5.408130  | -1.568290    |
| 1    | -2.695620 | 4.027596  | -0.047510    |
| 1    | -1.324975 | 5.807423  | -1.080958    |
| 8    | 1.183645  | -0.867751 | 1.090173     |



|    |           |           |           |
|----|-----------|-----------|-----------|
| 6  | 3.538978  | -0.684272 | 0.673544  |
| 9  | 3.648668  | 0.295611  | 1.565984  |
| 9  | 4.483744  | -0.516052 | -0.247550 |
| 9  | 3.769527  | -1.835991 | 1.302479  |
| 6  | 2.031079  | -1.816749 | -0.973485 |
| 1  | 2.690236  | -1.638534 | -1.818210 |
| 1  | 2.244427  | -2.777182 | -0.512374 |
| 3  | -0.912433 | -1.223695 | 0.635585  |
| 35 | 0.215652  | -1.912607 | -1.670121 |
| 6  | 0.361494  | 0.864687  | 2.475034  |
| 53 | -3.457867 | -0.995994 | 0.423809  |
| 1  | 1.370333  | 1.160522  | 2.764903  |
| 1  | -0.304799 | 1.723760  | 2.481926  |
| 1  | -0.028189 | 0.109961  | 3.153742  |

Energy -3788.917330 (Hartree)

#### TS Int-Br→4Br

| Atom | X         | Y         | Z (Angstrom) |
|------|-----------|-----------|--------------|
| 6    | -1.587613 | -1.067844 | 0.479293     |
| 6    | -1.182495 | 1.077049  | 0.577148     |
| 7    | -0.665627 | -0.039313 | 0.090206     |
| 7    | -2.319555 | 0.973433  | 1.224736     |
| 6    | -0.574528 | 2.408768  | 0.376685     |
| 6    | -0.006401 | 2.728327  | -0.854800    |
| 6    | -0.589764 | 3.355152  | 1.399121     |
| 6    | 0.540845  | 3.986044  | -1.060461    |
| 1    | -0.006887 | 1.991271  | -1.648765    |
| 6    | -0.039543 | 4.612086  | 1.189352     |
| 1    | -1.007623 | 3.097999  | 2.365177     |
| 6    | 0.525292  | 4.928705  | -0.039395    |
| 1    | 0.979226  | 4.230957  | -2.019403    |
| 1    | -0.043949 | 5.341064  | 1.989659     |
| 1    | 0.956974  | 5.908389  | -0.200621    |
| 8    | -2.628879 | -0.420826 | 1.203351     |
| 6    | -0.936545 | -2.052849 | 1.479768     |
| 9    | -0.384603 | -1.400461 | 2.503464     |
| 9    | 0.021199  | -2.790717 | 0.907229     |
| 9    | -1.838879 | -2.898578 | 1.988207     |
| 6    | -2.143290 | -1.882049 | -0.688225    |
| 1    | -1.332517 | -2.339008 | -1.249522    |
| 1    | -2.842300 | -2.641708 | -0.348157    |
| 3    | -3.717239 | 2.121914  | 1.771961     |
| 35   | -3.110871 | -0.737219 | -1.919089    |
| 6    | 1.424058  | -0.374597 | -0.120692    |
| 53   | 3.930108  | -0.768379 | -0.387302    |
| 1    | 1.518310  | 0.633023  | -0.480928    |
| 1    | 1.486378  | -0.571888 | 0.934166     |
| 1    | 1.196627  | -1.166298 | -0.810654    |

Energy -3788.828728 (Hartree)

#### 4Br

| Atom | X         | Y         | Z (Angstrom) |
|------|-----------|-----------|--------------|
| 6    | -2.432936 | -0.044552 | -0.306181    |
| 6    | -0.409668 | 0.937320  | -0.176153    |
| 7    | -1.626063 | 0.917460  | 0.408065     |
| 7    | -0.319685 | 0.161720  | -1.203073    |
| 6    | 0.759620  | 1.693780  | 0.299055     |
| 6    | 1.180579  | 1.568136  | 1.621462     |
| 6    | 1.499831  | 2.445353  | -0.609285    |
| 6    | 2.346310  | 2.196482  | 2.029792     |
| 1    | 0.616921  | 0.960445  | 2.318995     |
| 6    | 2.661165  | 3.077642  | -0.189934    |
| 1    | 1.164500  | 2.533654  | -1.635060    |



|        |              |           |           |
|--------|--------------|-----------|-----------|
| 6      | 3.085159     | 2.951050  | 1.126007  |
| 1      | 2.683495     | 2.088604  | 3.052367  |
| 1      | 3.237250     | 3.663968  | -0.893775 |
| 1      | 3.996208     | 3.438422  | 1.449006  |
| 8      | -1.591718    | -0.446521 | -1.365522 |
| 6      | -3.663845    | 0.629030  | -0.966883 |
| 9      | -3.306275    | 1.736781  | -1.608849 |
| 9      | -4.594837    | 0.956539  | -0.066956 |
| 9      | -4.226141    | -0.194830 | -1.849067 |
| 6      | -2.904934    | -1.231124 | 0.529328  |
| 1      | -3.549329    | -0.907947 | 1.342981  |
| 1      | -3.432170    | -1.944376 | -0.099188 |
| 3      | 1.285274     | -0.664589 | -1.959045 |
| 35     | -1.389381    | -2.152888 | 1.309148  |
| 6      | -2.093061    | 1.678365  | 1.552367  |
| 53     | 3.433906     | -1.132232 | -0.608544 |
| 1      | -1.314305    | 2.376605  | 1.844703  |
| 1      | -2.984346    | 2.248181  | 1.292210  |
| 1      | -2.312766    | 1.018173  | 2.393203  |
| Energy | -3788.923419 | (Hartree) |           |

# Int-Br-EXPSOLV

| Atom | X         | Y         | Z (Angstrom) |
|------|-----------|-----------|--------------|
| 6    | -1.242589 | -1.344877 | -0.698794    |
| 6    | -0.387199 | 0.625155  | -0.916922    |
| 7    | -1.556885 | 0.044584  | -0.736432    |
| 7    | 0.683449  | -0.137356 | -1.024705    |
| 6    | -0.248939 | 2.098221  | -0.971737    |
| 6    | -1.223844 | 2.897363  | -0.377329    |
| 6    | 0.840744  | 2.698232  | -1.600407    |
| 6    | -1.104735 | 4.279958  | -0.399952    |
| 1    | -2.068769 | 2.422863  | 0.107307     |
| 6    | 0.954073  | 4.081259  | -1.627837    |
| 1    | 1.593025  | 2.080004  | -2.075466    |
| 6    | -0.015092 | 4.874714  | -1.024398    |
| 1    | -1.863658 | 4.893641  | 0.068998     |
| 1    | 1.797503  | 4.542158  | -2.126793    |
| 1    | 0.076044  | 5.953538  | -1.046902    |
| 8    | 0.159447  | -1.472568 | -0.920893    |
| 6    | -1.941610 | -2.065883 | -1.872593    |
| 9    | -1.594552 | -1.535949 | -3.046319    |
| 9    | -3.276180 | -1.985668 | -1.777940    |
| 9    | -1.629734 | -3.370505 | -1.925896    |
| 6    | -1.659680 | -2.059321 | 0.589834     |
| 1    | -2.730691 | -1.964360 | 0.750810     |
| 1    | -1.364096 | -3.105413 | 0.582668     |
| 3    | 2.548743  | 0.043397  | -0.464397    |
| 6    | 4.022827  | 2.682146  | -0.015832    |
| 8    | 3.074861  | 1.677671  | 0.331349     |
| 6    | 2.449224  | 2.115405  | 1.538607     |
| 6    | 3.547499  | 2.839208  | 2.335016     |
| 6    | 4.686101  | 3.031884  | 1.310370     |
| 1    | 4.694807  | 2.271121  | -0.767082    |
| 1    | 3.494036  | 3.545180  | -0.435028    |
| 1    | 1.628232  | 2.793622  | 1.283463     |
| 1    | 2.041764  | 1.235595  | 2.037295     |
| 1    | 3.179248  | 3.790514  | 2.714787     |
| 1    | 3.878917  | 2.243822  | 3.184567     |
| 1    | 5.089171  | 4.042913  | 1.311234     |
| 1    | 5.502553  | 2.336986  | 1.508861     |
| 6    | 2.592850  | -2.547953 | 1.119004     |
| 8    | 3.132190  | -1.244941 | 0.853240     |
| 6    | 4.090294  | -0.977896 | 1.875587     |



|        |              |           |           |
|--------|--------------|-----------|-----------|
| 6      | 3.422216     | -1.493404 | 3.138046  |
| 6      | 2.711959     | -2.762148 | 2.638376  |
| 1      | 1.570217     | -2.552738 | 0.748800  |
| 1      | 3.182097     | -3.290004 | 0.571874  |
| 1      | 5.014534     | -1.530063 | 1.663005  |
| 1      | 4.301228     | 0.090361  | 1.874781  |
| 1      | 4.134683     | -1.690544 | 3.937259  |
| 1      | 2.697275     | -0.757828 | 3.490459  |
| 1      | 3.307659     | -3.649306 | 2.849752  |
| 1      | 1.735817     | -2.889502 | 3.101858  |
| 6      | 3.363411     | -1.023985 | -2.955542 |
| 8      | 3.777427     | -0.084543 | -1.959999 |
| 6      | 5.064720     | -0.527058 | -1.515951 |
| 6      | 5.036235     | -2.063358 | -1.590210 |
| 6      | 3.735635     | -2.372410 | -2.357813 |
| 1      | 2.297334     | -0.883253 | -3.124262 |
| 1      | 3.914235     | -0.829398 | -3.882016 |
| 1      | 5.826728     | -0.110947 | -2.180885 |
| 1      | 5.223019     | -0.137846 | -0.509815 |
| 1      | 5.912156     | -2.435352 | -2.119474 |
| 1      | 5.025768     | -2.508144 | -0.596087 |
| 1      | 3.862055     | -3.141876 | -3.117355 |
| 1      | 2.949516     | -2.690328 | -1.671151 |
| 35     | -0.794002    | -1.250621 | 2.130224  |
| 6      | -4.754458    | 1.051284  | -1.271898 |
| 1      | -5.401085    | 0.482543  | -1.931142 |
| 1      | -4.994141    | 2.108752  | -1.295856 |
| 1      | -3.702148    | 0.861120  | -1.461510 |
| 53     | -5.128910    | 0.369209  | 0.716083  |
| Energy | -4486.247909 | (Hartree) |           |

**TS Int-Br→2Br-EXPSOLV**

| Atom | X         | Y         | Z (Angstrom) |
|------|-----------|-----------|--------------|
| 6    | -0.211396 | 2.442086  | -0.982119    |
| 6    | 0.032293  | 1.465059  | 0.933449     |
| 7    | -0.217549 | 2.637912  | 0.432816     |
| 7    | 0.221061  | 0.442053  | 0.067616     |
| 6    | 0.126704  | 1.223238  | 2.389197     |
| 6    | -0.252624 | 2.233708  | 3.272205     |
| 6    | 0.587377  | 0.009307  | 2.895172     |
| 6    | -0.164687 | 2.034011  | 4.641377     |
| 1    | -0.614705 | 3.172572  | 2.874103     |
| 6    | 0.685416  | -0.184216 | 4.266332     |
| 1    | 0.869261  | -0.790760 | 2.224281     |
| 6    | 0.310540  | 0.826755  | 5.141489     |
| 1    | -0.463154 | 2.823050  | 5.319817     |
| 1    | 1.053361  | -1.127624 | 4.649786     |
| 1    | 0.385815  | 0.674253  | 6.210840     |
| 8    | 0.027746  | 1.057767  | -1.213566    |
| 6    | 0.973487  | 3.216577  | -1.604192    |
| 9    | 2.130766  | 2.845520  | -1.056593    |
| 9    | 0.848844  | 4.535630  | -1.429855    |
| 9    | 1.070004  | 2.994216  | -2.921292    |
| 6    | -1.486028 | 2.894017  | -1.690960    |
| 1    | -1.653708 | 3.956185  | -1.535717    |
| 1    | -1.445734 | 2.668641  | -2.753546    |
| 3    | -0.774964 | -1.324214 | -0.003547    |
| 6    | -1.678544 | -2.548577 | 2.666297     |
| 8    | -1.806948 | -1.622227 | 1.573592     |
| 6    | -2.772690 | -0.605939 | 1.888247     |
| 6    | -2.889883 | -0.624850 | 3.400691     |
| 6    | -2.701314 | -2.110609 | 3.710171     |
| 1    | -1.860558 | -3.557482 | 2.293997     |



|        |              |           |           |
|--------|--------------|-----------|-----------|
| 1      | -0.656034    | -2.490322 | 3.044123  |
| 1      | -2.413178    | 0.339873  | 1.483373  |
| 1      | -3.724962    | -0.856767 | 1.408773  |
| 1      | -2.089459    | -0.031520 | 3.845456  |
| 1      | -3.847926    | -0.236760 | 3.742197  |
| 1      | -2.348824    | -2.295753 | 4.723519  |
| 1      | -3.640957    | -2.646107 | 3.566236  |
| 6      | -2.109593    | -1.087989 | -2.718330 |
| 8      | -2.107147    | -1.594599 | -1.376178 |
| 6      | -3.308358    | -2.347505 | -1.207599 |
| 6      | -4.358792    | -1.516033 | -1.921342 |
| 6      | -3.586461    | -0.985805 | -3.139475 |
| 1      | -1.588503    | -0.133165 | -2.702063 |
| 1      | -1.562609    | -1.785321 | -3.359921 |
| 1      | -3.195744    | -3.329442 | -1.682980 |
| 1      | -3.476527    | -2.482830 | -0.140890 |
| 1      | -5.235894    | -2.099597 | -2.195676 |
| 1      | -4.673605    | -0.695137 | -1.275878 |
| 1      | -3.772966    | -1.605597 | -4.015627 |
| 1      | -3.864985    | 0.038040  | -3.381291 |
| 6      | 1.155689     | -2.602992 | -1.613870 |
| 8      | 0.434105     | -2.783527 | -0.375660 |
| 6      | -0.302031    | -4.020902 | -0.416486 |
| 6      | -0.331381    | -4.430708 | -1.878110 |
| 6      | 1.018474     | -3.915314 | -2.370630 |
| 1      | 0.701478     | -1.770377 | -2.161424 |
| 1      | 2.190654     | -2.353326 | -1.381862 |
| 1      | 0.221652     | -4.758178 | 0.197384  |
| 1      | -1.292986    | -3.846232 | 0.005416  |
| 1      | -0.457250    | -5.504898 | -2.001962 |
| 1      | -1.142875    | -3.917155 | -2.396746 |
| 1      | 1.815334     | -4.601674 | -2.079786 |
| 1      | 1.059766     | -3.769245 | -3.448490 |
| 35     | -3.033180    | 1.966153  | -0.979115 |
| 6      | 2.312190     | -0.031050 | 0.028403  |
| 1      | 2.216439     | 0.142623  | -1.028801 |
| 1      | 2.105551     | -1.002964 | 0.438276  |
| 1      | 2.546307     | 0.786011  | 0.689459  |
| 53     | 4.777363     | -0.625409 | -0.240247 |
| Energy | -4486.225321 |           | (Hartree) |

# 2Br-EXPSOLV

| Atom | X         | Y        | Z (Angstrom) |
|------|-----------|----------|--------------|
| 6    | -2.742003 | 1.776503 | -0.595379    |
| 6    | -0.813183 | 1.907939 | 0.414015     |
| 7    | -2.000700 | 2.354477 | 0.483620     |
| 7    | -0.580976 | 0.991298 | -0.652117    |
| 6    | 0.263780  | 2.249067 | 1.350447     |
| 6    | 0.076936  | 3.333718 | 2.211672     |
| 6    | 1.438070  | 1.503304 | 1.416192     |
| 6    | 1.057991  | 3.662678 | 3.128424     |
| 1    | -0.836658 | 3.910096 | 2.149499     |
| 6    | 2.417576  | 1.836438 | 2.341481     |
| 1    | 1.605559  | 0.660220 | 0.755121     |
| 6    | 2.228934  | 2.912248 | 3.196047     |
| 1    | 0.913991  | 4.505791 | 3.791430     |
| 1    | 3.329633  | 1.255040 | 2.382297     |
| 1    | 2.996628  | 3.172668 | 3.913606     |
| 8    | -1.859390 | 0.901425 | -1.288514    |
| 6    | -3.172573 | 2.892453 | -1.573710    |
| 9    | -2.119989 | 3.582705 | -2.005023    |
| 9    | -4.012311 | 3.747273 | -0.990817    |
| 9    | -3.784417 | 2.379044 | -2.643012    |



|        |              |           |           |
|--------|--------------|-----------|-----------|
| 6      | -3.985058    | 1.023194  | -0.139255 |
| 1      | -4.655845    | 1.688536  | 0.396913  |
| 1      | -4.496828    | 0.571338  | -0.984886 |
| 3      | -0.221190    | -1.070101 | -0.120887 |
| 6      | 0.624509     | -1.455752 | 2.775326  |
| 8      | -0.307933    | -1.657390 | 1.701253  |
| 6      | -1.224570    | -2.657022 | 2.153876  |
| 6      | -0.333780    | -3.685500 | 2.828235  |
| 6      | 0.742289     | -2.809966 | 3.496140  |
| 1      | 1.562464     | -1.111028 | 2.345972  |
| 1      | 0.230488     | -0.680007 | 3.436678  |
| 1      | -1.918088    | -2.209390 | 2.875016  |
| 1      | -1.782647    | -3.025047 | 1.294269  |
| 1      | -0.881131    | -4.302209 | 3.538557  |
| 1      | 0.110840     | -4.336257 | 2.073514  |
| 1      | 0.549423     | -2.688625 | 4.560612  |
| 1      | 1.736330     | -3.238236 | 3.379814  |
| 6      | -2.430508    | -2.355089 | -1.905178 |
| 8      | -1.205190    | -2.300508 | -1.173780 |
| 6      | -0.712059    | -3.645076 | -1.108216 |
| 6      | -1.954841    | -4.551001 | -1.074658 |
| 6      | -3.126182    | -3.590349 | -1.358094 |
| 1      | -2.963549    | -1.422107 | -1.742345 |
| 1      | -2.203471    | -2.462311 | -2.971497 |
| 1      | -0.100779    | -3.840389 | -1.993603 |
| 1      | -0.083147    | -3.726561 | -0.221201 |
| 1      | -1.878889    | -5.324403 | -1.836924 |
| 1      | -2.065672    | -5.041086 | -0.108468 |
| 1      | -3.849915    | -4.000624 | -2.059831 |
| 1      | -3.646667    | -3.334988 | -0.434197 |
| 6      | 1.930385     | -1.563186 | -2.083159 |
| 8      | 1.571674     | -1.521769 | -0.684205 |
| 6      | 2.427066     | -2.404646 | 0.062969  |
| 6      | 2.943585     | -3.408775 | -0.950436 |
| 6      | 3.093322     | -2.543297 | -2.200054 |
| 1      | 1.049622     | -1.890824 | -2.640727 |
| 1      | 2.211398     | -0.560955 | -2.402895 |
| 1      | 3.242574     | -1.821582 | 0.501058  |
| 1      | 1.834159     | -2.858696 | 0.856973  |
| 1      | 3.879893     | -3.863979 | -0.632196 |
| 1      | 2.205388     | -4.196762 | -1.109148 |
| 1      | 4.038805     | -2.000499 | -2.167903 |
| 1      | 3.048868     | -3.114395 | -3.125727 |
| 35     | -3.492089    | -0.408000 | 1.067756  |
| 6      | 0.387451     | 1.456433  | -1.666644 |
| 53     | 4.617698     | 1.030899  | -0.866256 |
| 1      | 0.160842     | 2.473984  | -1.986402 |
| 1      | 1.391336     | 1.408569  | -1.248598 |
| 1      | 0.319800     | 0.775809  | -2.511143 |
| Energy | -4486.291270 | (Hartree) |           |

**TS Int-Br→4Br-EXPSOLV**

| Atom | X         | Y         | Z (Angstrom) |
|------|-----------|-----------|--------------|
| 6    | 1.149709  | -1.825526 | 0.409721     |
| 6    | 0.618320  | 0.288414  | 0.399430     |
| 7    | 1.590376  | -0.524074 | -0.007126    |
| 7    | -0.383433 | -0.243860 | 1.053269     |
| 6    | 0.572013  | 1.729843  | 0.075621     |
| 6    | 1.087844  | 2.185677  | -1.135593    |
| 6    | -0.032685 | 2.629713  | 0.952265     |
| 6    | 0.999070  | 3.530305  | -1.467470    |
| 1    | 1.542200  | 1.478368  | -1.818923    |
| 6    | -0.117915 | 3.973579  | 0.618033     |



|    |           |           |           |
|----|-----------|-----------|-----------|
| 1  | -0.428681 | 2.271546  | 1.893773  |
| 6  | 0.395545  | 4.425355  | -0.592363 |
| 1  | 1.398149  | 3.878982  | -2.411526 |
| 1  | -0.581710 | 4.670387  | 1.305109  |
| 1  | 0.329758  | 5.474767  | -0.851087 |
| 8  | -0.042299 | -1.630074 | 1.160253  |
| 6  | 2.150565  | -2.483122 | 1.382725  |
| 9  | 2.424540  | -1.682412 | 2.412487  |
| 9  | 3.309494  | -2.778908 | 0.780989  |
| 9  | 1.665302  | -3.623761 | 1.887075  |
| 6  | 0.915093  | -2.796156 | -0.751438 |
| 1  | 1.808396  | -2.885821 | -1.364087 |
| 1  | 0.593479  | -3.774050 | -0.401522 |
| 3  | -2.238267 | 0.088002  | 0.403646  |
| 6  | -2.423394 | 2.045745  | -1.844075 |
| 8  | -2.606260 | 0.711318  | -1.365128 |
| 6  | -3.357675 | 0.037482  | -2.370086 |
| 6  | -4.436059 | 1.042479  | -2.754978 |
| 6  | -3.722604 | 2.401105  | -2.585701 |
| 1  | -2.202800 | 2.682473  | -0.987866 |
| 1  | -1.567576 | 2.057614  | -2.524557 |
| 1  | -2.704445 | -0.184094 | -3.222009 |
| 1  | -3.730683 | -0.896277 | -1.951934 |
| 1  | -4.805751 | 0.880132  | -3.765740 |
| 1  | -5.276666 | 0.961401  | -2.064263 |
| 1  | -3.498935 | 2.862653  | -3.545918 |
| 1  | -4.331346 | 3.098007  | -2.011695 |
| 6  | -3.199399 | -2.805824 | 0.736682  |
| 8  | -3.389890 | -1.391870 | 0.701021  |
| 6  | -4.794555 | -1.154689 | 0.571478  |
| 6  | -5.371045 | -2.378576 | -0.164997 |
| 6  | -4.167229 | -3.327333 | -0.311348 |
| 1  | -2.150074 | -3.003878 | 0.530984  |
| 1  | -3.454447 | -3.177845 | 1.735407  |
| 1  | -5.231511 | -1.046924 | 1.568206  |
| 1  | -4.922889 | -0.217854 | 0.027665  |
| 1  | -6.162617 | -2.836432 | 0.426129  |
| 1  | -5.789736 | -2.104927 | -1.132428 |
| 1  | -4.430290 | -4.371481 | -0.151622 |
| 1  | -3.716262 | -3.231320 | -1.300121 |
| 6  | -3.138058 | 1.193638  | 2.876580  |
| 8  | -3.076916 | 1.444459  | 1.461824  |
| 6  | -4.077179 | 2.398352  | 1.079691  |
| 6  | -5.032160 | 2.468731  | 2.259585  |
| 6  | -4.080031 | 2.249374  | 3.434452  |
| 1  | -3.527513 | 0.183307  | 3.031178  |
| 1  | -2.126967 | 1.247715  | 3.280882  |
| 1  | -3.594722 | 3.364607  | 0.900956  |
| 1  | -4.542570 | 2.057767  | 0.153641  |
| 1  | -5.566294 | 3.416153  | 2.302969  |
| 1  | -5.759383 | 1.655824  | 2.204632  |
| 1  | -3.532723 | 3.168527  | 3.651938  |
| 1  | -4.578836 | 1.915928  | 4.342504  |
| 35 | -0.498469 | -2.123912 | -1.904478 |
| 6  | 3.648568  | 0.090599  | -0.037649 |
| 53 | 6.079502  | 0.826021  | -0.107348 |
| 1  | 3.308587  | 1.065718  | -0.334361 |
| 1  | 3.723172  | -0.148542 | 1.007277  |
| 1  | 3.819155  | -0.663016 | -0.783500 |

Energy            -4486.220575    (Hartree)

**4Br-EXPSOLV**



| Atom | X         | Y         | Z (Angstrom) |
|------|-----------|-----------|--------------|
| 6    | 2.955865  | -1.100657 | -0.847496    |
| 6    | 1.286962  | -1.275913 | 0.652100     |
| 7    | 2.401428  | -1.915269 | 0.206890     |
| 7    | 1.099844  | -0.126845 | 0.108498     |
| 6    | 0.373306  | -1.787401 | 1.686665     |
| 6    | 0.871147  | -2.249424 | 2.904158     |
| 6    | -0.998636 | -1.753278 | 1.453440     |
| 6    | -0.009335 | -2.681901 | 3.883173     |
| 1    | 1.938506  | -2.251177 | 3.089583     |
| 6    | -1.873161 | -2.193669 | 2.436938     |
| 1    | -1.382734 | -1.396111 | 0.503471     |
| 6    | -1.379880 | -2.657875 | 3.648872     |
| 1    | 0.374361  | -3.034938 | 4.831656     |
| 1    | -2.939081 | -2.172659 | 2.246178     |
| 1    | -2.063813 | -3.001790 | 4.414437     |
| 8    | 2.162637  | 0.063472  | -0.812716    |
| 6    | 2.727970  | -1.746454 | -2.242419    |
| 9    | 1.460589  | -2.132052 | -2.375022    |
| 9    | 3.504440  | -2.815969 | -2.435614    |
| 9    | 2.993863  | -0.872576 | -3.212097    |
| 6    | 4.435710  | -0.769615 | -0.698159    |
| 1    | 5.044803  | -1.669101 | -0.734925    |
| 1    | 4.746973  | -0.083100 | -1.481337    |
| 3    | -0.269623 | 1.339724  | 0.152096     |
| 6    | -2.621916 | 1.259228  | 1.907368     |
| 8    | -1.303955 | 1.776928  | 1.682422     |
| 6    | -1.234810 | 3.015921  | 2.386988     |
| 6    | -2.575025 | 3.680077  | 2.104193     |
| 6    | -3.544522 | 2.484990  | 1.999794     |
| 1    | -2.860742 | 0.583479  | 1.086728     |
| 1    | -2.618647 | 0.695017  | 2.843860     |
| 1    | -1.108390 | 2.813394  | 3.455946     |
| 1    | -0.369517 | 3.567195  | 2.020513     |
| 1    | -2.853881 | 4.385607  | 2.884873     |
| 1    | -2.527283 | 4.217827  | 1.156766     |
| 1    | -4.187453 | 2.410848  | 2.875071     |
| 1    | -4.181859 | 2.567657  | 1.121022     |
| 6    | 2.028772  | 3.137881  | 0.313369     |
| 8    | 0.745210  | 2.872491  | -0.280014    |
| 6    | 0.198146  | 4.072032  | -0.850442    |
| 6    | 1.347284  | 5.067647  | -0.868129    |
| 6    | 2.132917  | 4.653053  | 0.375333     |
| 1    | 2.065134  | 2.650899  | 1.288809     |
| 1    | 2.801404  | 2.705290  | -0.325654    |
| 1    | -0.194511 | 3.833407  | -1.839285    |
| 1    | -0.621363 | 4.422406  | -0.214952    |
| 1    | 1.955152  | 4.927473  | -1.763726    |
| 1    | 0.998146  | 6.098028  | -0.838329    |
| 1    | 3.166631  | 4.993812  | 0.369260     |
| 1    | 1.643458  | 5.032437  | 1.274734     |
| 6    | -1.272355 | 0.177492  | -2.324666    |
| 8    | -1.559135 | 0.973558  | -1.159024    |
| 6    | -2.648905 | 1.868906  | -1.423814    |
| 6    | -2.681107 | 1.999966  | -2.935566    |
| 6    | -2.308544 | 0.581140  | -3.367983    |
| 1    | -0.253760 | 0.408344  | -2.647436    |
| 1    | -1.334136 | -0.876826 | -2.050299    |



|        |              |           |           |
|--------|--------------|-----------|-----------|
| 1      | -3.574391    | 1.424158  | -1.047163 |
| 1      | -2.454690    | 2.803617  | -0.894038 |
| 1      | -3.656057    | 2.317546  | -3.301238 |
| 1      | -1.926739    | 2.715243  | -3.270097 |
| 1      | -3.181029    | -0.070019 | -3.299149 |
| 1      | -1.909145    | 0.528516  | -4.379178 |
| 35     | 4.772349     | 0.095292  | 1.000990  |
| 6      | 2.734442     | -3.320083 | 0.371002  |
| 53     | -4.479260    | -1.687775 | -0.622153 |
| 1      | 2.371673     | -3.663625 | 1.334512  |
| 1      | 2.289729     | -3.934059 | -0.414718 |
| 1      | 3.817730     | -3.434930 | 0.350514  |
| Energy | -4486.299618 | (Hartree) |           |



## References

1. Buscemi, S.; Pace, A.; Pibiri, I.; Vivona, N.; Spinelli, D., Fluorinated heterocyclic compounds. An expedient route to 5-perfluoroalkyl-1, 2, 4-triazoles via an unusual hydrazinolysis of 5-perfluoroalkyl-1, 2, 4-oxadiazoles: First examples of an ANRORC-like reaction in 1, 2, 4-oxadiazole derivatives. *The Journal of Organic Chemistry* **2003**, *68* (2), 605-608.
2. Frisch, M. J.; Trucks, G. W.; Schlegel, H. B.; Scuseria, G. E.; Robb, M. A.; Cheeseman, J. R.; Scalmani, G.; Barone, V.; Petersson, G. A.; Nakatsuji, H.; Li, X.; Caricato, M.; Marenich, A. V.; Bloino, J.; Janesko, B. G.; Gomperts, R.; Mennucci, B.; Hratchian, H. P.; Ortiz, J. V.; Izmaylov, A. F.; Sonnenberg, J. L.; Williams; Ding, F.; Lipparini, F.; Egidi, F.; Goings, J.; Peng, B.; Petrone, A.; Henderson, T.; Ranasinghe, D.; Zakrzewski, V. G.; Gao, J.; Rega, N.; Zheng, G.; Liang, W.; Hada, M.; Ehara, M.; Toyota, K.; Fukuda, R.; Hasegawa, J.; Ishida, M.; Nakajima, T.; Honda, Y.; Kitao, O.; Nakai, H.; Vreven, T.; Throssell, K.; Montgomery Jr., J. A.; Peralta, J. E.; Ogliaro, F.; Bearpark, M. J.; Heyd, J. J.; Brothers, E. N.; Kudin, K. N.; Staroverov, V. N.; Keith, T. A.; Kobayashi, R.; Normand, J.; Raghavachari, K.; Rendell, A. P.; Burant, J. C.; Iyengar, S. S.; Tomasi, J.; Cossi, M.; Millam, J. M.; Klene, M.; Adamo, C.; Cammi, R.; Ochterski, J. W.; Martin, R. L.; Morokuma, K.; Farkas, O.; Foresman, J. B.; Fox, D. J. *Gaussian 16 Rev. B.01*, Wallingford, CT, 2016.
3. Zhao, Y.; Truhlar, D. G., The M06 suite of density functionals for main group thermochemistry, thermochemical kinetics, noncovalent interactions, excited states, and transition elements: two new functionals and systematic testing of four M06-class functionals and 12 other functionals. *Theor Chem Acc* **2008**, *120* (1-3), 215-241.
4. Weigend, F., Accurate Coulomb-fitting basis sets for H to Rn. *Physical chemistry chemical physics* **2006**, *8* (9), 1057-1065.
5. Weigend, F.; Ahlrichs, R., Balanced basis sets of split valence, triple zeta valence and quadruple zeta valence quality for H to Rn: Design and assessment of accuracy. *Physical Chemistry Chemical Physics* **2005**, *7* (18), 3297-3305.
6. Marenich, A. V.; Cramer, C. J.; Truhlar, D. G., Universal Solvation Model Based on Solute Electron Density and on a Continuum Model of the Solvent Defined by the Bulk Dielectric Constant and Atomic Surface Tensions. *The Journal of Physical Chemistry B* **2009**, *113* (18), 6378-6396.
7. Riplinger, C.; Neese, F., An efficient and near linear scaling pair natural orbital based local coupled cluster method. *The Journal of Chemical Physics* **2013**, *138* (3).
8. Neese, F., Software update: The ORCA program system—Version 5.0. *WIREs Computational Molecular Science* **2022**, *12* (5).
9. Pracht, P.; Grimme, S.; Bannwarth, C.; Bohle, F.; Ehlert, S.; Feldmann, G.; Gorges, J.; Müller, M.; Neudecker, T.; Plett, C.; Spicher, S.; Steinbach, P.; Wesolowski, P. A.; Zeller, F., CREST-A program for the exploration of low-energy molecular chemical space. *J Chem Phys* **2024**, *160* (11).
10. Lu, T.; Chen, F. W., Multiwfn: A multifunctional wavefunction analyzer. *J Comput Chem* **2012**, *33* (5), 580-592.
11. Scalfani, V. F.; Williams, A. J.; Tkachenko, V.; Karapetyan, K.; Pshenichnov, A.; Hanson, R. M.; Liddie, J. M.; Bara, J. E., Programmatic conversion of crystal structures into 3D printable files using Jmol. *Journal of Cheminformatics* **2016**, *8* (1).
12. Parr, R. G.; Yang, W., Density functional approach to the frontier-electron theory of chemical reactivity. *Journal of the American Chemical Society* **2002**, *106* (14), 4049-4050.
13. Liu, S., Steric effect: A quantitative description from density functional theory. *The Journal of Chemical Physics* **2007**, *126* (24).
14. Weizsäcker, C. F. v., Zur Theorie der Kernmassen. *Zeitschrift für Physik* **1935**, *96* (7-8), 431-458.

<sup>i</sup> Version 1.37.0.0 (STOE, 2021)

<sup>ii</sup> Version 1.31.186.0 (STOE, 2022)

<sup>iii</sup> Dolomanov, O.V., Bourhis, L.J., Gildea, R.J., Howard, J.A.K. & Puschmann, H., OLEX2, (2009), *J. Appl. Cryst.* **42**, 339-341



---

<sup>iv</sup> C. B. Huebschle, G. M. Sheldrick and B. Dittrich, ShelXle: a Qt graphical user interface for SHELXL, J. Appl. Cryst., 44, (2011) 1281-1284

<sup>v</sup> Sheldrick, G. M. (2015). *SHELXS v 2016/4* University of Göttingen, Germany.

<sup>vi</sup> Sheldrick, G. M. (2015). *SHELXL v 2016/4* University of Göttingen, Germany.

<sup>vii</sup> A. L. Spek, Acta Cryst. 2009, D65, 148-155
